# Supplementary material for: Network modeling suggests HIV infection phenocopies PI3K-AKT pathway mutations to enhance HPV-associated cervical cancer
Source: Royal Society of Chemistry journal article supplement (doi:10.1039/d3mo00025g), 2023-05-19
Supplement: d3mo00025g2.xlsx [file d3mo00025g2.xlsx]

## Sheet: Metadata
Table S1. A complete set of enriched biological pathways for HIV preys, Hi-SIFs, HPV preys and HPV-HIV overalapping preys.
Table S2. A complete set of enriched biological pathways for HPV/Hi-SIFs propagated subnetwork clusters.
Table S3. A complete set of enriched biological pathways for HIV preys propagated subnetwork clusters.
Table S4. A complete set of enriched biological pathways for Hi-SIFs preys propagated subnetwork clusters.
Table S5. A complete set of enriched biological pathways for HPV preys propagated subnetwork clusters.
Table S6. A complete set of enriched biological pathways for HPV/HIV preys propagated subnetwork clusters.
Table S7. A complete set of enriched biological pathways for the HPV/Hi-SIFs subnetwork clusters connected to the top mutated Hi-SIFs.
Table S8. A complete set of enriched biological pathways for the HPV/HIV subnetwork clusters connected to the top mutated HIV preys.
Table S9. Pathway common base network used for network propagation.
Table S10. Network propagation scores for HPV prey, Hi-SIFs and HPV preys.

## Sheet: Table S1
group	ID	Description	GeneRatio	BgRatio	pvalue	p.adjust	qvalue	geneID	Count
HIV PPIs	REACTOME_NEDDYLATION	REACTOME_NEDDYLATION	23/187	240/13356	3.11408e-13	3.72133e-10	2.93051e-10	PSMD11/PSMD7/PSMB6/PSMA1/FBXO6/PUM2/DCAF16/ELOB/ELOC/RNF7/CUL5/PSME3/SQSTM1/CUL2/DDB1/RBBP7/DDA1/DCAF11/FBXW11/BTRC/SKP1/CUL1/NEDD8	23
HIV PPIs	WP_NSP1_FROM_SARSCOV2_INHIBITS_TRANSLATION_INITIATION_IN_THE_HOST_CELL	WP_NSP1_FROM_SARSCOV2_INHIBITS_TRANSLATION_INITIATION_IN_THE_HOST_CELL	8/187	16/13356	1.48677e-11	8.88346e-09	6.99565e-09	EIF3D/EIF3I/EIF3F/EIF3A/EIF3C/EIF3B/EIF3H/EIF3E	8
HIV PPIs	REACTOME_ACTIVATION_OF_THE_MRNA_UPON_BINDING_OF_THE_CAP_BINDING_COMPLEX_AND_EIFS_AND_SUBSEQUENT_BINDING_TO_43S	REACTOME_ACTIVATION_OF_THE_MRNA_UPON_BINDING_OF_THE_CAP_BINDING_COMPLEX_AND_EIFS_AND_SUBSEQUENT_BINDING_TO_43S	11/187	60/13356	5.69652e-10	1.88033e-07	1.48075e-07	EIF3D/EIF3I/EIF3F/EIF3A/EIF3C/EIF3L/EIF3K/EIF3B/EIF3H/EIF3E/EIF3M	11
HIV PPIs	KEGG_UBIQUITIN_MEDIATED_PROTEOLYSIS	KEGG_UBIQUITIN_MEDIATED_PROTEOLYSIS	15/187	135/13356	6.294e-10	1.88033e-07	1.48075e-07	UBA1/HERC2/ELOB/ELOC/HUWE1/STUB1/RNF7/CUL5/CUL2/DDB1/NEDD4L/FBXW11/BTRC/SKP1/CUL1	15
HIV PPIs	REACTOME_ANTIGEN_PROCESSING_UBIQUITINATION_PROTEASOME_DEGRADATION	REACTOME_ANTIGEN_PROCESSING_UBIQUITINATION_PROTEASOME_DEGRADATION	21/187	308/13356	2.0827e-09	4.97766e-07	3.91987e-07	PSMD11/PSMD7/PSMB6/PSMA1/FBXO6/UBA1/HERC2/ELOB/ELOC/HUWE1/STUB1/RNF7/CUL5/PSME3/CUL2/DCAF1/NEDD4L/FBXW11/BTRC/SKP1/CUL1	21
HIV PPIs	REACTOME_CLASS_I_MHC_MEDIATED_ANTIGEN_PROCESSING_PRESENTATION	REACTOME_CLASS_I_MHC_MEDIATED_ANTIGEN_PROCESSING_PRESENTATION	23/187	381/13356	3.5655e-09	7.10128e-07	5.5922e-07	PSMD11/PSMD7/PSMB6/CALR/PSMA1/PDIA3/FBXO6/UBA1/HERC2/ELOB/ELOC/HUWE1/STUB1/RNF7/CUL5/PSME3/CUL2/DCAF1/NEDD4L/FBXW11/BTRC/SKP1/CUL1	23
HIV PPIs	REACTOME_MITOTIC_G2_G2_M_PHASES	REACTOME_MITOTIC_G2_G2_M_PHASES	16/187	200/13356	2.05103e-08	3.5014e-06	2.75732e-06	PSMD11/PSMD7/PSMB6/PSMA1/YWHAE/YWHAG/SDCCAG8/PPP1R12A/PPP2CB/PSME3/DYNC1H1/DYNC1I2/FBXW11/BTRC/SKP1/CUL1	16
HIV PPIs	WP_TRANSLATION_FACTORS	WP_TRANSLATION_FACTORS	9/187	50/13356	2.6054e-08	3.89182e-06	3.06477e-06	EIF2AK2/EIF3D/EIF3I/EIF3F/EIF3A/EIF3C/EIF3B/EIF3H/EIF3E	9
HIV PPIs	REACTOME_TRANSLATION	REACTOME_TRANSLATION	19/187	295/13356	3.20343e-08	4.25345e-06	3.34955e-06	AIMP1/AIMP2/EEF1E1/NARS2/HARS2/MRPL11/EIF3D/EIF3I/EIF3F/EIF3A/EIF3C/EIF3L/EIF3K/EIF3B/EIF3H/EIF3E/EIF3M/MRPL42/CHCHD1	19
HIV PPIs	REACTOME_HOST_INTERACTIONS_OF_HIV_FACTORS	REACTOME_HOST_INTERACTIONS_OF_HIV_FACTORS	13/187	131/13356	3.59698e-08	4.29839e-06	3.38495e-06	PSMD11/PSMD7/PSMB6/PSMA1/CCNT1/CDK9/ELOB/ELOC/CUL5/PSME3/BTRC/SKP1/RANBP2	13
HIV PPIs	REACTOME_CELLULAR_RESPONSE_TO_CHEMICAL_STRESS	REACTOME_CELLULAR_RESPONSE_TO_CHEMICAL_STRESS	15/187	194/13356	9.07838e-08	9.86242e-06	7.76657e-06	PSMD11/PSMD7/PSMB6/P4HB/COX4I1/PSMA1/COX6B1/COX5A/CDKN2A/PSME3/SQSTM1/LRPPRC/BTRC/SKP1/CUL1	15
HIV PPIs	REACTOME_CELL_CYCLE_CHECKPOINTS	REACTOME_CELL_CYCLE_CHECKPOINTS	18/187	291/13356	1.38471e-07	1.30545e-05	1.02803e-05	PSMD11/PSMD7/PSMB6/PSMA1/YWHAE/YWHAZ/YWHAB/MCM6/YWHAG/CDKN2A/PPP2CB/HERC2/PSME3/DYNC1H1/DYNC1I2/DYNC1LI1/PPP2R5E/RANBP2	18
HIV PPIs	REACTOME_NUCLEAR_EVENTS_MEDIATED_BY_NFE2L2	REACTOME_NUCLEAR_EVENTS_MEDIATED_BY_NFE2L2	10/187	79/13356	1.42016e-07	1.30545e-05	1.02803e-05	PSMD11/PSMD7/PSMB6/PSMA1/CDKN2A/PSME3/SQSTM1/BTRC/SKP1/CUL1	10
HIV PPIs	REACTOME_MITOTIC_G1_PHASE_AND_G1_S_TRANSITION	REACTOME_MITOTIC_G1_PHASE_AND_G1_S_TRANSITION	13/187	149/13356	1.66279e-07	1.41931e-05	1.11769e-05	PSMD11/PSMD7/PSMB6/PSMA1/MCM6/CDKN2A/PPP2CB/POLE/POLE3/POLE4/PSME3/SKP1/CUL1	13
HIV PPIs	REACTOME_DECTIN_1_MEDIATED_NONCANONICAL_NF_KB_SIGNALING	REACTOME_DECTIN_1_MEDIATED_NONCANONICAL_NF_KB_SIGNALING	9/187	62/13356	1.82578e-07	1.45454e-05	1.14544e-05	PSMD11/PSMD7/PSMB6/PSMA1/PSME3/FBXW11/BTRC/SKP1/CUL1	9
HIV PPIs	REACTOME_PROGRAMMED_CELL_DEATH	REACTOME_PROGRAMMED_CELL_DEATH	15/187	208/13356	2.26159e-07	1.68913e-05	1.33017e-05	PSMD11/PSMD7/PSMB6/FLOT1/PSMA1/YWHAE/YWHAZ/DSP/YWHAB/YWHAG/SDCBP/NMT1/CDKN2A/STUB1/PSME3	15
HIV PPIs	REACTOME_DEGRADATION_OF_BETA_CATENIN_BY_THE_DESTRUCTION_COMPLEX	REACTOME_DEGRADATION_OF_BETA_CATENIN_BY_THE_DESTRUCTION_COMPLEX	10/187	85/13356	2.86867e-07	2.01651e-05	1.58798e-05	PSMD11/PSMD7/PSMB6/PSMA1/PPP2CB/PSME3/BTRC/SKP1/CUL1/PPP2R5E	10
HIV PPIs	REACTOME_REGULATION_OF_PLK1_ACTIVITY_AT_G2_M_TRANSITION	REACTOME_REGULATION_OF_PLK1_ACTIVITY_AT_G2_M_TRANSITION	10/187	87/13356	3.58007e-07	2.37677e-05	1.87168e-05	YWHAE/YWHAG/SDCCAG8/PPP1R12A/DYNC1H1/DYNC1I2/FBXW11/BTRC/SKP1/CUL1	10
HIV PPIs	REACTOME_INTERLEUKIN_1_SIGNALING	REACTOME_INTERLEUKIN_1_SIGNALING	11/187	114/13356	5.55228e-07	3.49209e-05	2.75e-05	PSMD11/PSMD7/PSMB6/APP/PSMA1/PSME3/SQSTM1/FBXW11/BTRC/SKP1/CUL1	11
HIV PPIs	REACTOME_NEGATIVE_REGULATION_OF_NOTCH4_SIGNALING	REACTOME_NEGATIVE_REGULATION_OF_NOTCH4_SIGNALING	8/187	54/13356	7.62882e-07	4.35562e-05	3.43002e-05	PSMD11/PSMD7/PSMB6/PSMA1/YWHAZ/PSME3/SKP1/CUL1	8
HIV PPIs	REACTOME_REGULATION_OF_RUNX2_EXPRESSION_AND_ACTIVITY	REACTOME_REGULATION_OF_RUNX2_EXPRESSION_AND_ACTIVITY	9/187	73/13356	7.65423e-07	4.35562e-05	3.43002e-05	PSMD11/PSMD7/PSMB6/PSMA1/CBFB/STUB1/PSME3/SKP1/CUL1	9
HIV PPIs	REACTOME_HIV_INFECTION	REACTOME_HIV_INFECTION	15/187	231/13356	8.68289e-07	4.58328e-05	3.60929e-05	PSMD11/PSMD7/PSMB6/PSMA1/NMT1/CCNT1/CDK9/ELOB/ELOC/CUL5/PSME3/NEDD4L/BTRC/SKP1/RANBP2	15
HIV PPIs	REACTOME_SCF_BETA_TRCP_MEDIATED_DEGRADATION_OF_EMI1	REACTOME_SCF_BETA_TRCP_MEDIATED_DEGRADATION_OF_EMI1	8/187	55/13356	8.82137e-07	4.58328e-05	3.60929e-05	PSMD11/PSMD7/PSMB6/PSMA1/PSME3/BTRC/SKP1/CUL1	8
HIV PPIs	REACTOME_EUKARYOTIC_TRANSLATION_INITIATION	REACTOME_EUKARYOTIC_TRANSLATION_INITIATION	11/187	120/13356	9.31221e-07	4.62083e-05	3.63886e-05	EIF3D/EIF3I/EIF3F/EIF3A/EIF3C/EIF3L/EIF3K/EIF3B/EIF3H/EIF3E/EIF3M	11
HIV PPIs	REACTOME_CELLULAR_RESPONSE_TO_HYPOXIA	REACTOME_CELLULAR_RESPONSE_TO_HYPOXIA	9/187	75/13356	9.66701e-07	4.62083e-05	3.63886e-05	PSMD11/PSMD7/PSMB6/PSMA1/LIMD1/ELOB/ELOC/PSME3/CUL2	9
HIV PPIs	REACTOME_SYNTHESIS_OF_DNA	REACTOME_SYNTHESIS_OF_DNA	11/187	121/13356	1.01199e-06	4.65128e-05	3.66285e-05	PSMD11/PSMD7/PSMB6/PSMA1/MCM6/POLE/POLE3/POLE4/PSME3/SKP1/CUL1	11
HIV PPIs	REACTOME_CLEC7A_DECTIN_1_SIGNALING	REACTOME_CLEC7A_DECTIN_1_SIGNALING	10/187	100/13356	1.32376e-06	5.85888e-05	4.61382e-05	PSMD11/PSMD7/PSMB6/PSMA1/AHCYL1/PSME3/FBXW11/BTRC/SKP1/CUL1	10
HIV PPIs	REACTOME_KEAP1_NFE2L2_PATHWAY	REACTOME_KEAP1_NFE2L2_PATHWAY	10/187	102/13356	1.59004e-06	6.78606e-05	5.34396e-05	PSMD11/PSMD7/PSMB6/PSMA1/CDKN2A/PSME3/SQSTM1/BTRC/SKP1/CUL1	10
HIV PPIs	REACTOME_DEGRADATION_OF_GLI1_BY_THE_PROTEASOME	REACTOME_DEGRADATION_OF_GLI1_BY_THE_PROTEASOME	8/187	60/13356	1.74633e-06	7.1961e-05	5.66687e-05	PSMD11/PSMD7/PSMB6/PSMA1/PSME3/BTRC/SKP1/CUL1	8
HIV PPIs	REACTOME_DOWNSTREAM_SIGNALING_EVENTS_OF_B_CELL_RECEPTOR_BCR	REACTOME_DOWNSTREAM_SIGNALING_EVENTS_OF_B_CELL_RECEPTOR_BCR	9/187	81/13356	1.86829e-06	7.44202e-05	5.86053e-05	PSMD11/PSMD7/PSMB6/PSMA1/PSME3/FBXW11/BTRC/SKP1/CUL1	9
HIV PPIs	REACTOME_TRANSCRIPTIONAL_REGULATION_BY_TP53	REACTOME_TRANSCRIPTIONAL_REGULATION_BY_TP53	18/187	363/13356	3.4318e-06	0.00013229	0.000104177	PRMT1/COX4I1/COX6B1/COX5A/YWHAE/YWHAZ/YWHAB/YWHAG/CDKN2A/PPP2CB/MSH2/CCNT1/CDK9/ELOB/ELOC/RBBP7/LRPPRC/PIP4P1	18
HIV PPIs	KEGG_OOCYTE_MEIOSIS	KEGG_OOCYTE_MEIOSIS	10/187	113/13356	4.05808e-06	0.000151544	0.00011934	YWHAE/YWHAZ/YWHAB/YWHAG/PPP2CB/FBXW11/BTRC/SKP1/CUL1/PPP2R5E	10
HIV PPIs	BIOCARTA_ERAD_PATHWAY	BIOCARTA_ERAD_PATHWAY	5/187	19/13356	5.05708e-06	0.000183128	0.000144211	GANAB/UGGT1/MOGS/SKP1/CUL1	5
HIV PPIs	REACTOME_ORC1_REMOVAL_FROM_CHROMATIN	REACTOME_ORC1_REMOVAL_FROM_CHROMATIN	8/187	71/13356	6.36863e-06	0.000221433	0.000174377	PSMD11/PSMD7/PSMB6/PSMA1/MCM6/PSME3/SKP1/CUL1	8
HIV PPIs	SIG_INSULIN_RECEPTOR_PATHWAY_IN_CARDIAC_MYOCYTES	SIG_INSULIN_RECEPTOR_PATHWAY_IN_CARDIAC_MYOCYTES	7/187	51/13356	6.4855e-06	0.000221433	0.000174377	FLOT1/YWHAE/YWHAZ/YWHAB/YWHAG/CDKN2A/GRB2	7
HIV PPIs	REACTOME_N_GLYCAN_TRIMMING_IN_THE_ER_AND_CALNEXIN_CALRETICULIN_CYCLE	REACTOME_N_GLYCAN_TRIMMING_IN_THE_ER_AND_CALNEXIN_CALRETICULIN_CYCLE	6/187	35/13356	8.05045e-06	0.000260899	0.000205456	GANAB/PRKCSH/CALR/PDIA3/UGGT1/MOGS	6
HIV PPIs	REACTOME_APOPTOSIS	REACTOME_APOPTOSIS	12/187	179/13356	8.07804e-06	0.000260899	0.000205456	PSMD11/PSMD7/PSMB6/PSMA1/YWHAE/YWHAZ/DSP/YWHAB/YWHAG/NMT1/CDKN2A/PSME3	12
HIV PPIs	REACTOME_INTERLEUKIN_1_FAMILY_SIGNALING	REACTOME_INTERLEUKIN_1_FAMILY_SIGNALING	11/187	152/13356	9.42136e-06	0.000296277	0.000233316	PSMD11/PSMD7/PSMB6/APP/PSMA1/PSME3/SQSTM1/FBXW11/BTRC/SKP1/CUL1	11
HIV PPIs	REACTOME_REGULATION_OF_RUNX3_EXPRESSION_AND_ACTIVITY	REACTOME_REGULATION_OF_RUNX3_EXPRESSION_AND_ACTIVITY	7/187	55/13356	1.08437e-05	0.000332262	0.000261653	PSMD11/PSMD7/PSMB6/PSMA1/CDKN2A/CBFB/PSME3	7
HIV PPIs	REACTOME_TNFR2_NON_CANONICAL_NF_KB_PATHWAY	REACTOME_TNFR2_NON_CANONICAL_NF_KB_PATHWAY	9/187	101/13356	1.17617e-05	0.00035138	0.000276709	PSMD11/PSMD7/PSMB6/PSMA1/PSME3/FBXW11/BTRC/SKP1/CUL1	9
HIV PPIs	REACTOME_FORMATION_OF_RNA_POL_II_ELONGATION_COMPLEX	REACTOME_FORMATION_OF_RNA_POL_II_ELONGATION_COMPLEX	7/187	58/13356	1.55085e-05	0.000452016	0.000355959	WDR61/CCNT1/CDK9/AFF4/MLLT1/ELOB/ELOC	7
HIV PPIs	REACTOME_SARS_COV_2_TARGETS_HOST_INTRACELLULAR_SIGNALLING_AND_REGULATORY_PATHWAYS	REACTOME_SARS_COV_2_TARGETS_HOST_INTRACELLULAR_SIGNALLING_AND_REGULATORY_PATHWAYS	4/187	12/13356	1.68728e-05	0.000480072	0.000378053	YWHAE/YWHAZ/YWHAB/YWHAG	4
HIV PPIs	REACTOME_S_PHASE	REACTOME_S_PHASE	11/187	163/13356	1.8245e-05	0.000507042	0.000399292	PSMD11/PSMD7/PSMB6/PSMA1/MCM6/POLE/POLE3/POLE4/PSME3/SKP1/CUL1	11
HIV PPIs	REACTOME_SIGNALING_BY_NOTCH4	REACTOME_SIGNALING_BY_NOTCH4	8/187	82/13356	1.87147e-05	0.000508273	0.000400261	PSMD11/PSMD7/PSMB6/PSMA1/YWHAZ/PSME3/SKP1/CUL1	8
HIV PPIs	REACTOME_SCF_SKP2_MEDIATED_DEGRADATION_OF_P27_P21	REACTOME_SCF_SKP2_MEDIATED_DEGRADATION_OF_P27_P21	7/187	60/13356	1.94562e-05	0.000516669	0.000406873	PSMD11/PSMD7/PSMB6/PSMA1/PSME3/SKP1/CUL1	7
HIV PPIs	REACTOME_SIGNALING_BY_THE_B_CELL_RECEPTOR_BCR	REACTOME_SIGNALING_BY_THE_B_CELL_RECEPTOR_BCR	11/187	166/13356	2.16403e-05	0.000562177	0.00044271	PSMD11/PSMD7/PSMB6/PSMA1/GRB2/AHCYL1/PSME3/FBXW11/BTRC/SKP1/CUL1	11
HIV PPIs	REACTOME_G2_M_CHECKPOINTS	REACTOME_G2_M_CHECKPOINTS	11/187	167/13356	2.28875e-05	0.000581926	0.000458262	PSMD11/PSMD7/PSMB6/PSMA1/YWHAE/YWHAZ/YWHAB/MCM6/YWHAG/HERC2/PSME3	11
HIV PPIs	REACTOME_CHK1_CHK2_CDS1_MEDIATED_INACTIVATION_OF_CYCLIN_B_CDK1_COMPLEX	REACTOME_CHK1_CHK2_CDS1_MEDIATED_INACTIVATION_OF_CYCLIN_B_CDK1_COMPLEX	4/187	13/13356	2.41055e-05	0.000600126	0.000472594	YWHAE/YWHAZ/YWHAB/YWHAG	4
HIV PPIs	REACTOME_CALNEXIN_CALRETICULIN_CYCLE	REACTOME_CALNEXIN_CALRETICULIN_CYCLE	5/187	26/13356	2.6419e-05	0.000644301	0.000507382	GANAB/PRKCSH/CALR/PDIA3/UGGT1	5
HIV PPIs	REACTOME_C_TYPE_LECTIN_RECEPTORS_CLRS	REACTOME_C_TYPE_LECTIN_RECEPTORS_CLRS	10/187	140/13356	2.707e-05	0.000646972	0.000509485	PSMD11/PSMD7/PSMB6/PSMA1/AHCYL1/PSME3/FBXW11/BTRC/SKP1/CUL1	10
HIV PPIs	REACTOME_TP53_REGULATES_METABOLIC_GENES	REACTOME_TP53_REGULATES_METABOLIC_GENES	8/187	87/13356	2.89096e-05	0.000677391	0.00053344	COX4I1/COX6B1/COX5A/YWHAE/YWHAZ/YWHAB/YWHAG/LRPPRC	8
HIV PPIs	REACTOME_APC_C_MEDIATED_DEGRADATION_OF_CELL_CYCLE_PROTEINS	REACTOME_APC_C_MEDIATED_DEGRADATION_OF_CELL_CYCLE_PROTEINS	8/187	88/13356	3.14244e-05	0.000722156	0.000568692	PSMD11/PSMD7/PSMB6/PSMA1/PSME3/BTRC/SKP1/CUL1	8
HIV PPIs	WP_VEGFAVEGFR2_SIGNALING_PATHWAY	WP_VEGFAVEGFR2_SIGNALING_PATHWAY	18/187	431/13356	3.52551e-05	0.000794903	0.00062598	SDF2L1/PSMD11/P4HA2/CALU/P4HB/CALR/LMAN1/TXNDC5/YWHAE/SDCBP/EIF3D/EIF3F/RCN1/EIF3H/ARRB2/GRB2/ELOC/FBXW11	18
HIV PPIs	SIG_PIP3_SIGNALING_IN_CARDIAC_MYOCTES	SIG_PIP3_SIGNALING_IN_CARDIAC_MYOCTES	7/187	67/13356	4.03436e-05	0.00089279	0.000703065	YWHAE/YWHAZ/YWHAB/YWHAG/NOLC1/CDKN2A/GRB2	7
HIV PPIs	REACTOME_SWITCHING_OF_ORIGINS_TO_A_POST_REPLICATIVE_STATE	REACTOME_SWITCHING_OF_ORIGINS_TO_A_POST_REPLICATIVE_STATE	8/187	92/13356	4.33918e-05	0.000942785	0.000742435	PSMD11/PSMD7/PSMB6/PSMA1/MCM6/PSME3/SKP1/CUL1	8
HIV PPIs	REACTOME_ACTIVATION_OF_BAD_AND_TRANSLOCATION_TO_MITOCHONDRIA	REACTOME_ACTIVATION_OF_BAD_AND_TRANSLOCATION_TO_MITOCHONDRIA	4/187	15/13356	4.50197e-05	0.000960689	0.000756535	YWHAE/YWHAZ/YWHAB/YWHAG	4
HIV PPIs	REACTOME_TRANSCRIPTIONAL_REGULATION_BY_RUNX2	REACTOME_TRANSCRIPTIONAL_REGULATION_BY_RUNX2	9/187	120/13356	4.6894e-05	0.000983128	0.000774205	PSMD11/PSMD7/PSMB6/PSMA1/CBFB/STUB1/PSME3/SKP1/CUL1	9
HIV PPIs	REACTOME_SIGNALING_BY_HEDGEHOG	REACTOME_SIGNALING_BY_HEDGEHOG	10/187	150/13356	4.89234e-05	0.00100799	0.000793785	PSMD11/PSMD7/PSMB6/P4HB/PSMA1/ARRB2/PSME3/BTRC/SKP1/CUL1	10
HIV PPIs	REACTOME_SIGNALING_BY_CSF3_G_CSF	REACTOME_SIGNALING_BY_CSF3_G_CSF	5/187	30/13356	5.4693e-05	0.00110777	0.000872356	GRB2/ELOB/ELOC/RNF7/CUL5	5
HIV PPIs	REACTOME_MAP3K8_TPL2_DEPENDENT_MAPK1_3_ACTIVATION	REACTOME_MAP3K8_TPL2_DEPENDENT_MAPK1_3_ACTIVATION	4/187	16/13356	5.93711e-05	0.00118247	0.000931189	FBXW11/BTRC/SKP1/CUL1	4
HIV PPIs	REACTOME_TCR_SIGNALING	REACTOME_TCR_SIGNALING	9/187	124/13356	6.06569e-05	0.00118772	0.000935317	PSMD11/PSMD7/PSMB6/PSMA1/PSME3/FBXW11/BTRC/SKP1/CUL1	9
HIV PPIs	REACTOME_FC_EPSILON_RECEPTOR_FCERI_SIGNALING	REACTOME_FC_EPSILON_RECEPTOR_FCERI_SIGNALING	11/187	186/13356	6.16221e-05	0.00118772	0.000935317	PSMD11/PSMD7/PSMB6/PSMA1/GRB2/AHCYL1/PSME3/FBXW11/BTRC/SKP1/CUL1	11
HIV PPIs	REACTOME_DNA_REPLICATION	REACTOME_DNA_REPLICATION	11/187	188/13356	6.78806e-05	0.00128758	0.00101396	PSMD11/PSMD7/PSMB6/PSMA1/MCM6/POLE/POLE3/POLE4/PSME3/SKP1/CUL1	11
HIV PPIs	REACTOME_SEPARATION_OF_SISTER_CHROMATIDS	REACTOME_SEPARATION_OF_SISTER_CHROMATIDS	11/187	191/13356	7.8288e-05	0.00146178	0.00115114	PSMD11/PSMD7/PSMB6/PSMA1/PPP2CB/PSME3/DYNC1H1/DYNC1I2/DYNC1LI1/PPP2R5E/RANBP2	11
HIV PPIs	PID_TGFBR_PATHWAY	PID_TGFBR_PATHWAY	6/187	54/13356	0.000102751	0.00188904	0.0014876	YWHAE/STRAP/PPP2CB/ARRB2/GRB2/NEDD4L	6
HIV PPIs	REACTOME_INTRINSIC_PATHWAY_FOR_APOPTOSIS	REACTOME_INTRINSIC_PATHWAY_FOR_APOPTOSIS	6/187	55/13356	0.000114005	0.00206418	0.00162553	YWHAE/YWHAZ/YWHAB/YWHAG/NMT1/CDKN2A	6
HIV PPIs	KEGG_BASE_EXCISION_REPAIR	KEGG_BASE_EXCISION_REPAIR	5/187	35/13356	0.000117725	0.00209971	0.00165351	POLE/POLE3/PARP4/POLE4/MPG	5
HIV PPIs	PID_HIF1A_PATHWAY	PID_HIF1A_PATHWAY	4/187	19/13356	0.000122349	0.00214638	0.00169025	CDKN2A/ELOB/ELOC/CUL2	4
HIV PPIs	REACTOME_FCERI_MEDIATED_NF_KB_ACTIVATION	REACTOME_FCERI_MEDIATED_NF_KB_ACTIVATION	9/187	136/13356	0.000123933	0.00214638	0.00169025	PSMD11/PSMD7/PSMB6/PSMA1/PSME3/FBXW11/BTRC/SKP1/CUL1	9
HIV PPIs	PID_BETA_CATENIN_NUC_PATHWAY	PID_BETA_CATENIN_NUC_PATHWAY	7/187	80/13356	0.000126478	0.00215917	0.00170033	YWHAE/YWHAZ/YWHAB/YWHAG/CDKN2A/SKP1/CUL1	7
HIV PPIs	KEGG_DNA_REPLICATION	KEGG_DNA_REPLICATION	5/187	36/13356	0.000135172	0.00222177	0.00174962	MCM6/POLE/POLE3/POLE4/SSBP1	5
HIV PPIs	PID_PI3K_PLC_TRK_PATHWAY	PID_PI3K_PLC_TRK_PATHWAY	5/187	36/13356	0.000135172	0.00222177	0.00174962	YWHAE/YWHAZ/YWHAB/YWHAG/GRB2	5
HIV PPIs	REACTOME_RNA_POLYMERASE_II_PRE_TRANSCRIPTION_EVENTS	REACTOME_RNA_POLYMERASE_II_PRE_TRANSCRIPTION_EVENTS	7/187	81/13356	0.000136826	0.00222177	0.00174962	WDR61/CCNT1/CDK9/AFF4/MLLT1/ELOB/ELOC	7
HIV PPIs	REACTOME_STABILIZATION_OF_P53	REACTOME_STABILIZATION_OF_P53	6/187	57/13356	0.000139442	0.00222177	0.00174962	PSMD11/PSMD7/PSMB6/PSMA1/CDKN2A/PSME3	6
HIV PPIs	REACTOME_TRANSLATION_OF_SARSCOV2_STRUCTURAL_PROTEINS	REACTOME_TRANSLATION_OF_SARSCOV2_STRUCTURAL_PROTEINS	6/187	57/13356	0.000139442	0.00222177	0.00174962	PRMT1/GANAB/PRKCSH/FUT8/PARP4/MOGS	6
HIV PPIs	PID_P38_MK2_PATHWAY	PID_P38_MK2_PATHWAY	4/187	21/13356	0.000184827	0.00284788	0.00224268	YWHAE/YWHAZ/YWHAB/YWHAG	4
HIV PPIs	REACTOME_CYCLIN_A_CDK2_ASSOCIATED_EVENTS_AT_S_PHASE_ENTRY	REACTOME_CYCLIN_A_CDK2_ASSOCIATED_EVENTS_AT_S_PHASE_ENTRY	7/187	85/13356	0.000185311	0.00284788	0.00224268	PSMD11/PSMD7/PSMB6/PSMA1/PSME3/SKP1/CUL1	7
HIV PPIs	REACTOME_HEDGEHOG_OFF_STATE	REACTOME_HEDGEHOG_OFF_STATE	8/187	113/13356	0.000185887	0.00284788	0.00224268	PSMD11/PSMD7/PSMB6/PSMA1/PSME3/BTRC/SKP1/CUL1	8
HIV PPIs	REACTOME_REGULATION_OF_MRNA_STABILITY_BY_PROTEINS_THAT_BIND_AU_RICH_ELEMENTS	REACTOME_REGULATION_OF_MRNA_STABILITY_BY_PROTEINS_THAT_BIND_AU_RICH_ELEMENTS	7/187	87/13356	0.000214293	0.00324151	0.00255267	PSMD11/PSMD7/PSMB6/PSMA1/YWHAZ/YWHAB/PSME3	7
HIV PPIs	WP_PROTEASOME_DEGRADATION	WP_PROTEASOME_DEGRADATION	6/187	62/13356	0.000222948	0.00333029	0.00262257	PSMD11/PSMD7/PSMB6/PSMA1/UBA1/PSME3	6
HIV PPIs	WP_DNA_MISMATCH_REPAIR	WP_DNA_MISMATCH_REPAIR	4/187	23/13356	0.000267536	0.00394697	0.00310821	POLE/POLE3/MSH2/POLE4	4
HIV PPIs	WP_CELL_CYCLE	WP_CELL_CYCLE	8/187	120/13356	0.000280921	0.00409391	0.00322392	YWHAE/YWHAZ/YWHAB/MCM6/YWHAG/CDKN2A/SKP1/CUL1	8
HIV PPIs	REACTOME_TRNA_AMINOACYLATION	REACTOME_TRNA_AMINOACYLATION	5/187	42/13356	0.000284986	0.00410311	0.00323117	AIMP1/AIMP2/EEF1E1/NARS2/HARS2	5
HIV PPIs	REACTOME_HEDGEHOG_LIGAND_BIOGENESIS	REACTOME_HEDGEHOG_LIGAND_BIOGENESIS	6/187	65/13356	0.000289351	0.00411637	0.00324161	PSMD11/PSMD7/PSMB6/P4HB/PSMA1/PSME3	6
HIV PPIs	REACTOME_ASPARAGINE_N_LINKED_GLYCOSYLATION	REACTOME_ASPARAGINE_N_LINKED_GLYCOSYLATION	13/187	305/13356	0.000365168	0.00507773	0.00399867	GANAB/PRKCSH/CALR/LMAN1/FUT8/LMAN2/PDIA3/UGGT1/TMED9/DYNC1H1/MOGS/DYNC1I2/DYNC1LI1	13
HIV PPIs	REACTOME_G1_S_DNA_DAMAGE_CHECKPOINTS	REACTOME_G1_S_DNA_DAMAGE_CHECKPOINTS	6/187	68/13356	0.000370368	0.00507773	0.00399867	PSMD11/PSMD7/PSMB6/PSMA1/CDKN2A/PSME3	6
HIV PPIs	KEGG_CELL_CYCLE	KEGG_CELL_CYCLE	8/187	125/13356	0.000370606	0.00507773	0.00399867	YWHAE/YWHAZ/YWHAB/MCM6/YWHAG/CDKN2A/SKP1/CUL1	8
HIV PPIs	REACTOME_INACTIVATION_OF_CSF3_G_CSF_SIGNALING	REACTOME_INACTIVATION_OF_CSF3_G_CSF_SIGNALING	4/187	25/13356	0.000373925	0.00507773	0.00399867	ELOB/ELOC/RNF7/CUL5	4
HIV PPIs	REACTOME_TRANSCRIPTIONAL_REGULATION_BY_RUNX3	REACTOME_TRANSCRIPTIONAL_REGULATION_BY_RUNX3	7/187	96/13356	0.000393333	0.00528127	0.00415896	PSMD11/PSMD7/PSMB6/PSMA1/CDKN2A/CBFB/PSME3	7
HIV PPIs	REACTOME_REGULATION_OF_PTEN_STABILITY_AND_ACTIVITY	REACTOME_REGULATION_OF_PTEN_STABILITY_AND_ACTIVITY	6/187	69/13356	0.000400985	0.00532419	0.00419275	PSMD11/PSMD7/PSMB6/PSMA1/STUB1/PSME3	6
HIV PPIs	REACTOME_DNA_REPLICATION_PRE_INITIATION	REACTOME_DNA_REPLICATION_PRE_INITIATION	9/187	160/13356	0.000418602	0.00549703	0.00432887	PSMD11/PSMD7/PSMB6/PSMA1/MCM6/POLE/POLE3/POLE4/PSME3	9
HIV PPIs	PID_INSULIN_GLUCOSE_PATHWAY	PID_INSULIN_GLUCOSE_PATHWAY	4/187	26/13356	0.000437108	0.00557997	0.00439418	YWHAE/YWHAZ/YWHAB/YWHAG	4
HIV PPIs	KEGG_PROTEASOME	KEGG_PROTEASOME	5/187	46/13356	0.000438926	0.00557997	0.00439418	PSMD11/PSMD7/PSMB6/PSMA1/PSME3	5
HIV PPIs	PID_A6B1_A6B4_INTEGRIN_PATHWAY	PID_A6B1_A6B4_INTEGRIN_PATHWAY	5/187	46/13356	0.000438926	0.00557997	0.00439418	YWHAE/YWHAZ/YWHAB/YWHAG/GRB2	5
HIV PPIs	REACTOME_MITOTIC_METAPHASE_AND_ANAPHASE	REACTOME_MITOTIC_METAPHASE_AND_ANAPHASE	11/187	236/13356	0.000493211	0.00620407	0.00488565	PSMD11/PSMD7/PSMB6/PSMA1/PPP2CB/PSME3/DYNC1H1/DYNC1I2/DYNC1LI1/PPP2R5E/RANBP2	11
HIV PPIs	REACTOME_REGULATION_OF_LOCALIZATION_OF_FOXO_TRANSCRIPTION_FACTORS	REACTOME_REGULATION_OF_LOCALIZATION_OF_FOXO_TRANSCRIPTION_FACTORS	3/187	12/13356	0.000541398	0.00673928	0.00530713	YWHAZ/YWHAB/YWHAG	3
HIV PPIs	REACTOME_UCH_PROTEINASES	REACTOME_UCH_PROTEINASES	7/187	102/13356	0.00056806	0.00699826	0.00551107	PSMD11/PSMD7/PSMB6/PSMA1/RUVBL1/PSME3/NEDD8	7
HIV PPIs	REACTOME_ABC_FAMILY_PROTEINS_MEDIATED_TRANSPORT	REACTOME_ABC_FAMILY_PROTEINS_MEDIATED_TRANSPORT	7/187	103/13356	0.000602389	0.00734546	0.00578449	PSMD11/PSMD7/PSMB6/PSMA1/PSME3/ABCD3/ABCB10	7
HIV PPIs	REACTOME_CROSS_PRESENTATION_OF_SOLUBLE_EXOGENOUS_ANTIGENS_ENDOSOMES	REACTOME_CROSS_PRESENTATION_OF_SOLUBLE_EXOGENOUS_ANTIGENS_ENDOSOMES	5/187	50/13356	0.000648495	0.00782779	0.00616432	PSMD11/PSMD7/PSMB6/PSMA1/PSME3	5
HIV PPIs	REACTOME_TRANSLATION_OF_SARSCOV1_STRUCTURAL_PROTEINS	REACTOME_TRANSLATION_OF_SARSCOV1_STRUCTURAL_PROTEINS	4/187	29/13356	0.000672051	0.008031	0.00632435	GANAB/PRKCSH/PARP4/MOGS	4
HIV PPIs	BIOCARTA_P27_PATHWAY	BIOCARTA_P27_PATHWAY	3/187	13/13356	0.000696586	0.00824178	0.00649034	SKP1/CUL1/NEDD8	3
HIV PPIs	REACTOME_ANTIGEN_PROCESSING_CROSS_PRESENTATION	REACTOME_ANTIGEN_PROCESSING_CROSS_PRESENTATION	7/187	106/13356	0.000715369	0.00838103	0.00659999	PSMD11/PSMD7/PSMB6/CALR/PSMA1/PDIA3/PSME3	7
HIV PPIs	REACTOME_ACTIVATION_OF_BH3_ONLY_PROTEINS	REACTOME_ACTIVATION_OF_BH3_ONLY_PROTEINS	4/187	30/13356	0.000767029	0.00881345	0.00694052	YWHAE/YWHAZ/YWHAB/YWHAG	4
HIV PPIs	REACTOME_RECOGNITION_OF_DNA_DAMAGE_BY_PCNA_CONTAINING_REPLICATION_COMPLEX	REACTOME_RECOGNITION_OF_DNA_DAMAGE_BY_PCNA_CONTAINING_REPLICATION_COMPLEX	4/187	30/13356	0.000767029	0.00881345	0.00694052	POLE/POLE3/POLE4/DDB1	4
HIV PPIs	REACTOME_SIGNALING_BY_WNT	REACTOME_SIGNALING_BY_WNT	13/187	331/13356	0.000787595	0.00896358	0.00705874	PSMD11/PSMD7/PSMB6/PSMA1/YWHAZ/PPP2CB/RUVBL1/ARRB2/PSME3/BTRC/SKP1/CUL1/PPP2R5E	13
HIV PPIs	WP_APOPTOSISRELATED_NETWORK_DUE_TO_ALTERED_NOTCH3_IN_OVARIAN_CANCER	WP_APOPTOSISRELATED_NETWORK_DUE_TO_ALTERED_NOTCH3_IN_OVARIAN_CANCER	5/187	53/13356	0.00084912	0.00957263	0.00753837	APP/RNF7/CUL5/SQSTM1/CUL1	5
HIV PPIs	WP_BASE_EXCISION_REPAIR	WP_BASE_EXCISION_REPAIR	4/187	31/13356	0.000871111	0.00972876	0.00766132	POLE/POLE3/POLE4/MPG	4
HIV PPIs	WP_CILIARY_LANDSCAPE	WP_CILIARY_LANDSCAPE	10/187	215/13356	0.000900703	0.00996611	0.00784823	PSMD7/MCM6/AIMP1/MSH2/DYNC1H1/DYNC1I2/DYNC1LI1/DCAF11/LRPPRC/ACSL3	10
HIV PPIs	REACTOME_AUF1_HNRNP_D0_BINDS_AND_DESTABILIZES_MRNA	REACTOME_AUF1_HNRNP_D0_BINDS_AND_DESTABILIZES_MRNA	5/187	55/13356	0.00100641	0.0108348	0.00853228	PSMD11/PSMD7/PSMB6/PSMA1/PSME3	5
HIV PPIs	REACTOME_DEGRADATION_OF_AXIN	REACTOME_DEGRADATION_OF_AXIN	5/187	55/13356	0.00100641	0.0108348	0.00853228	PSMD11/PSMD7/PSMB6/PSMA1/PSME3	5
HIV PPIs	REACTOME_SIGNALING_BY_ALK_IN_CANCER	REACTOME_SIGNALING_BY_ALK_IN_CANCER	5/187	55/13356	0.00100641	0.0108348	0.00853228	GRB2/SQSTM1/SKP1/CUL1/RANBP2	5
HIV PPIs	REACTOME_SIGNALING_BY_INTERLEUKINS	REACTOME_SIGNALING_BY_INTERLEUKINS	16/187	474/13356	0.00102998	0.0109895	0.00865416	PSMD11/PSMD7/PSMB6/P4HB/APP/PSMA1/YWHAZ/PPP2CB/MCL1/GRB2/PSME3/SQSTM1/FBXW11/BTRC/SKP1/CUL1	16
HIV PPIs	REACTOME_PROLACTIN_RECEPTOR_SIGNALING	REACTOME_PROLACTIN_RECEPTOR_SIGNALING	3/187	15/13356	0.00108557	0.011395	0.00897343	BTRC/SKP1/CUL1	3
HIV PPIs	REACTOME_ACTIVATION_OF_THE_PRE_REPLICATIVE_COMPLEX	REACTOME_ACTIVATION_OF_THE_PRE_REPLICATIVE_COMPLEX	4/187	33/13356	0.00110845	0.011395	0.00897343	MCM6/POLE/POLE3/POLE4	4
HIV PPIs	REACTOME_HIV_ELONGATION_ARREST_AND_RECOVERY	REACTOME_HIV_ELONGATION_ARREST_AND_RECOVERY	4/187	33/13356	0.00110845	0.011395	0.00897343	CCNT1/CDK9/ELOB/ELOC	4
HIV PPIs	WP_TYPE_I_COLLAGEN_SYNTHESIS_IN_THE_CONTEXT_OF_OSTEOGENESIS_IMPERFECTA	WP_TYPE_I_COLLAGEN_SYNTHESIS_IN_THE_CONTEXT_OF_OSTEOGENESIS_IMPERFECTA	4/187	33/13356	0.00110845	0.011395	0.00897343	P4HA2/P4HB/PLOD1/PLOD2	4
HIV PPIs	REACTOME_SARS_COV_INFECTIONS	REACTOME_SARS_COV_INFECTIONS	15/187	432/13356	0.00111566	0.011395	0.00897343	PRMT1/GANAB/PRKCSH/FUT8/YWHAE/YWHAZ/YWHAB/YWHAG/PARP4/FKBP4/GRB2/RBBP7/MOGS/COMT/RANBP2	15
HIV PPIs	REACTOME_DEGRADATION_OF_DVL	REACTOME_DEGRADATION_OF_DVL	5/187	57/13356	0.00118436	0.0119942	0.0094453	PSMD11/PSMD7/PSMB6/PSMA1/PSME3	5
HIV PPIs	KEGG_WNT_SIGNALING_PATHWAY	KEGG_WNT_SIGNALING_PATHWAY	8/187	151/13356	0.00128626	0.0128755	0.0101393	PPP2CB/RUVBL1/NFAT5/FBXW11/BTRC/SKP1/CUL1/PPP2R5E	8
HIV PPIs	REACTOME_HEDGEHOG_ON_STATE	REACTOME_HEDGEHOG_ON_STATE	6/187	86/13356	0.00129293	0.0128755	0.0101393	PSMD11/PSMD7/PSMB6/PSMA1/ARRB2/PSME3	6
HIV PPIs	REACTOME_METABOLISM_OF_POLYAMINES	REACTOME_METABOLISM_OF_POLYAMINES	5/187	59/13356	0.00138459	0.0135934	0.0107047	PSMD11/PSMD7/PSMB6/PSMA1/PSME3	5
HIV PPIs	PID_PI3KCI_AKT_PATHWAY	PID_PI3KCI_AKT_PATHWAY	4/187	35/13356	0.00138778	0.0135934	0.0107047	YWHAE/YWHAZ/YWHAB/YWHAG	4
HIV PPIs	REACTOME_DEFECTIVE_CFTR_CAUSES_CYSTIC_FIBROSIS	REACTOME_DEFECTIVE_CFTR_CAUSES_CYSTIC_FIBROSIS	5/187	61/13356	0.00160874	0.0155035	0.0122089	PSMD11/PSMD7/PSMB6/PSMA1/PSME3	5
HIV PPIs	WP_MODULATORS_OF_TCR_SIGNALING_AND_T_CELL_ACTIVATION	WP_MODULATORS_OF_TCR_SIGNALING_AND_T_CELL_ACTIVATION	5/187	61/13356	0.00160874	0.0155035	0.0122089	NDUFB10/GRB2/ELOB/RNF7/CUL5	5
HIV PPIs	REACTOME_TCF_DEPENDENT_SIGNALING_IN_RESPONSE_TO_WNT	REACTOME_TCF_DEPENDENT_SIGNALING_IN_RESPONSE_TO_WNT	10/187	234/13356	0.00170264	0.0162446	0.0127925	PSMD11/PSMD7/PSMB6/PSMA1/YWHAZ/PPP2CB/RUVBL1/PSME3/BTRC/PPP2R5E	10
HIV PPIs	REACTOME_MATURATION_OF_SARSCOV2_SPIKE_PROTEIN	REACTOME_MATURATION_OF_SARSCOV2_SPIKE_PROTEIN	4/187	37/13356	0.00171282	0.0162446	0.0127925	GANAB/PRKCSH/FUT8/MOGS	4
HIV PPIs	REACTOME_TP53_REGULATES_TRANSCRIPTION_OF_DNA_REPAIR_GENES	REACTOME_TP53_REGULATES_TRANSCRIPTION_OF_DNA_REPAIR_GENES	5/187	62/13356	0.0017303	0.0162811	0.0128213	MSH2/CCNT1/CDK9/ELOB/ELOC	5
HIV PPIs	REACTOME_PCP_CE_PATHWAY	REACTOME_PCP_CE_PATHWAY	6/187	92/13356	0.00183032	0.0170878	0.0134565	PSMD11/PSMD7/PSMB6/PSMA1/ARRB2/PSME3	6
HIV PPIs	REACTOME_RESOLUTION_OF_ABASIC_SITES_AP_SITES	REACTOME_RESOLUTION_OF_ABASIC_SITES_AP_SITES	4/187	38/13356	0.00189363	0.0175418	0.013814	POLE/POLE3/POLE4/MPG	4
HIV PPIs	REACTOME_SIGNALING_BY_TGF_BETA_RECEPTOR_COMPLEX	REACTOME_SIGNALING_BY_TGF_BETA_RECEPTOR_COMPLEX	6/187	93/13356	0.00193422	0.0177799	0.0140015	STRAP/CCNT1/CDK9/STUB1/NEDD4L/NEDD8	6
HIV PPIs	REACTOME_ASYMMETRIC_LOCALIZATION_OF_PCP_PROTEINS	REACTOME_ASYMMETRIC_LOCALIZATION_OF_PCP_PROTEINS	5/187	64/13356	0.00199344	0.0181844	0.0143201	PSMD11/PSMD7/PSMB6/PSMA1/PSME3	5
HIV PPIs	REACTOME_RHO_GTPASE_EFFECTORS	REACTOME_RHO_GTPASE_EFFECTORS	12/187	324/13356	0.00204619	0.0185243	0.0145877	YWHAE/YWHAZ/YWHAB/YWHAG/PPP1R12A/PPP2CB/GRB2/DYNC1H1/DYNC1I2/DYNC1LI1/PPP2R5E/RANBP2	12
HIV PPIs	REACTOME_PROTEIN_LOCALIZATION	REACTOME_PROTEIN_LOCALIZATION	8/187	164/13356	0.00216913	0.0194895	0.0153478	APP/TOMM40/TIMM13/TYSND1/ACOT8/AGPS/ABCD3/ACBD5	8
HIV PPIs	BIOCARTA_PROTEASOME_PATHWAY	BIOCARTA_PROTEASOME_PATHWAY	3/187	19/13356	0.00221862	0.0196719	0.0154915	PSMB6/PSMA1/UBA1	3
HIV PPIs	REACTOME_M_PHASE	REACTOME_M_PHASE	14/187	417/13356	0.00222235	0.0196719	0.0154915	PSMD11/PSMD7/PSMB6/PSMA1/YWHAE/YWHAG/SDCCAG8/PPP2CB/PSME3/DYNC1H1/DYNC1I2/DYNC1LI1/PPP2R5E/RANBP2	14
HIV PPIs	REACTOME_MITOTIC_PROMETAPHASE	REACTOME_MITOTIC_PROMETAPHASE	9/187	203/13356	0.00224488	0.0197252	0.0155334	YWHAE/YWHAG/SDCCAG8/PPP2CB/DYNC1H1/DYNC1I2/DYNC1LI1/PPP2R5E/RANBP2	9
HIV PPIs	REACTOME_DUAL_INCISION_IN_GG_NER	REACTOME_DUAL_INCISION_IN_GG_NER	4/187	41/13356	0.00251466	0.0218967	0.0172435	POLE/POLE3/POLE4/DDB1	4
HIV PPIs	REACTOME_SARS_COV_2_INFECTION	REACTOME_SARS_COV_2_INFECTION	11/187	289/13356	0.00252866	0.0218967	0.0172435	PRMT1/GANAB/PRKCSH/FUT8/YWHAE/YWHAZ/YWHAB/YWHAG/PARP4/MOGS/RANBP2	11
HIV PPIs	WP_TGFBETA_SIGNALING_PATHWAY	WP_TGFBETA_SIGNALING_PATHWAY	7/187	132/13356	0.00255414	0.0219582	0.0172919	APP/STRAP/GRB2/NEDD4L/BTRC/SKP1/CUL1	7
HIV PPIs	REACTOME_REGULATION_OF_RAS_BY_GAPS	REACTOME_REGULATION_OF_RAS_BY_GAPS	5/187	68/13356	0.00260576	0.0222421	0.0175154	PSMD11/PSMD7/PSMB6/PSMA1/PSME3	5
HIV PPIs	PID_MTOR_4PATHWAY	PID_MTOR_4PATHWAY	5/187	69/13356	0.00277801	0.0235441	0.0185408	YWHAE/YWHAZ/YWHAB/YWHAG/FBXW11	5
HIV PPIs	REACTOME_REGULATION_OF_EXPRESSION_OF_SLITS_AND_ROBOS	REACTOME_REGULATION_OF_EXPRESSION_OF_SLITS_AND_ROBOS	8/187	172/13356	0.00291349	0.0245185	0.0193081	PSMD11/PSMD7/PSMB6/PSMA1/ELOB/ELOC/PSME3/CUL2	8
HIV PPIs	KEGG_RENAL_CELL_CARCINOMA	KEGG_RENAL_CELL_CARCINOMA	5/187	70/13356	0.00295836	0.024713	0.0194613	FLCN/GRB2/ELOB/ELOC/CUL2	5
HIV PPIs	REACTOME_PCNA_DEPENDENT_LONG_PATCH_BASE_EXCISION_REPAIR	REACTOME_PCNA_DEPENDENT_LONG_PATCH_BASE_EXCISION_REPAIR	3/187	21/13356	0.00298321	0.024713	0.0194613	POLE/POLE3/POLE4	3
HIV PPIs	REACTOME_HIV_TRANSCRIPTION_ELONGATION	REACTOME_HIV_TRANSCRIPTION_ELONGATION	4/187	43/13356	0.00299865	0.024713	0.0194613	CCNT1/CDK9/ELOB/ELOC	4
HIV PPIs	REACTOME_DISEASES_OF_SIGNAL_TRANSDUCTION_BY_GROWTH_FACTOR_RECEPTORS_AND_SECOND_MESSENGERS	REACTOME_DISEASES_OF_SIGNAL_TRANSDUCTION_BY_GROWTH_FACTOR_RECEPTORS_AND_SECOND_MESSENGERS	14/187	432/13356	0.00306198	0.0250621	0.0197362	PSMD11/PSMD7/PSMB6/PSMA1/YWHAB/PPP2CB/ARRB2/GRB2/PSME3/SQSTM1/SKP1/CUL1/PPP2R5E/RANBP2	14
HIV PPIs	REACTOME_INTERLEUKIN_17_SIGNALING	REACTOME_INTERLEUKIN_17_SIGNALING	5/187	71/13356	0.00314701	0.02541	0.0200101	PPP2CB/FBXW11/BTRC/SKP1/CUL1	5
HIV PPIs	WP_PARKINUBIQUITIN_PROTEASOMAL_SYSTEM_PATHWAY	WP_PARKINUBIQUITIN_PROTEASOMAL_SYSTEM_PATHWAY	5/187	71/13356	0.00314701	0.02541	0.0200101	PSMD11/PSMD7/UBA1/STUB1/CUL1	5
HIV PPIs	REACTOME_RESPIRATORY_ELECTRON_TRANSPORT	REACTOME_RESPIRATORY_ELECTRON_TRANSPORT	6/187	103/13356	0.00323526	0.0258226	0.0203351	COX4I1/COX6B1/NDUFB10/COX5A/NDUFS8/LRPPRC	6
HIV PPIs	KEGG_NUCLEOTIDE_EXCISION_REPAIR	KEGG_NUCLEOTIDE_EXCISION_REPAIR	4/187	44/13356	0.00326294	0.0258226	0.0203351	POLE/POLE3/POLE4/DDB1	4
HIV PPIs	WP_NUCLEOTIDE_EXCISION_REPAIR	WP_NUCLEOTIDE_EXCISION_REPAIR	4/187	44/13356	0.00326294	0.0258226	0.0203351	POLE/POLE3/POLE4/DDB1	4
HIV PPIs	REACTOME_AURKA_ACTIVATION_BY_TPX2	REACTOME_AURKA_ACTIVATION_BY_TPX2	5/187	72/13356	0.00334419	0.0262915	0.0207043	YWHAE/YWHAG/SDCCAG8/DYNC1H1/DYNC1I2	5
HIV PPIs	REACTOME_PTEN_REGULATION	REACTOME_PTEN_REGULATION	7/187	139/13356	0.00340849	0.0266218	0.0209645	PSMD11/PSMD7/PSMB6/PSMA1/STUB1/PSME3/RBBP7	7
HIV PPIs	REACTOME_TOLL_LIKE_RECEPTOR_9_TLR9_CASCADE	REACTOME_TOLL_LIKE_RECEPTOR_9_TLR9_CASCADE	6/187	106/13356	0.00372962	0.0288406	0.0227118	APP/PPP2CB/FBXW11/BTRC/SKP1/CUL1	6
HIV PPIs	REACTOME_APC_C_CDH1_MEDIATED_DEGRADATION_OF_CDC20_AND_OTHER_APC_C_CDH1_TARGETED_PROTEINS_IN_LATE_MITOSIS_EARLY_G1	REACTOME_APC_C_CDH1_MEDIATED_DEGRADATION_OF_CDC20_AND_OTHER_APC_C_CDH1_TARGETED_PROTEINS_IN_LATE_MITOSIS_EARLY_G1	5/187	74/13356	0.00376497	0.0288406	0.0227118	PSMD11/PSMD7/PSMB6/PSMA1/PSME3	5
HIV PPIs	REACTOME_RHOC_GTPASE_CYCLE	REACTOME_RHOC_GTPASE_CYCLE	5/187	74/13356	0.00376497	0.0288406	0.0227118	LMAN1/FLOT1/ARHGEF12/ABCD3/ACBD5	5
HIV PPIs	REACTOME_TGF_BETA_RECEPTOR_SIGNALING_ACTIVATES_SMADS	REACTOME_TGF_BETA_RECEPTOR_SIGNALING_ACTIVATES_SMADS	4/187	46/13356	0.00383828	0.0292149	0.0230065	STRAP/STUB1/NEDD4L/NEDD8	4
HIV PPIs	REACTOME_INTRACELLULAR_SIGNALING_BY_SECOND_MESSENGERS	REACTOME_INTRACELLULAR_SIGNALING_BY_SECOND_MESSENGERS	11/187	307/13356	0.00400549	0.0302947	0.0238568	PSMD11/PSMD7/PSMB6/PSMA1/PPP2CB/GRB2/AHCYL1/STUB1/PSME3/RBBP7/PPP2R5E	11
HIV PPIs	REACTOME_MYD88_INDEPENDENT_TLR4_CASCADE	REACTOME_MYD88_INDEPENDENT_TLR4_CASCADE	6/187	108/13356	0.00408898	0.0307317	0.0242009	APP/PPP2CB/FBXW11/BTRC/SKP1/CUL1	6
HIV PPIs	PID_LKB1_PATHWAY	PID_LKB1_PATHWAY	4/187	47/13356	0.00415015	0.0308039	0.0242578	YWHAE/YWHAZ/YWHAB/YWHAG	4
HIV PPIs	REACTOME_CYCLIN_D_ASSOCIATED_EVENTS_IN_G1	REACTOME_CYCLIN_D_ASSOCIATED_EVENTS_IN_G1	4/187	47/13356	0.00415015	0.0308039	0.0242578	CDKN2A/PPP2CB/SKP1/CUL1	4
HIV PPIs	REACTOME_CYTOSOLIC_TRNA_AMINOACYLATION	REACTOME_CYTOSOLIC_TRNA_AMINOACYLATION	3/187	24/13356	0.00440227	0.0324735	0.0255727	AIMP1/AIMP2/EEF1E1	3
HIV PPIs	REACTOME_DNA_DAMAGE_BYPASS	REACTOME_DNA_DAMAGE_BYPASS	4/187	48/13356	0.0044787	0.0328346	0.025857	POLE/POLE3/POLE4/DDB1	4
HIV PPIs	REACTOME_MITOTIC_SPINDLE_CHECKPOINT	REACTOME_MITOTIC_SPINDLE_CHECKPOINT	6/187	111/13356	0.00467524	0.0340666	0.0268271	PPP2CB/DYNC1H1/DYNC1I2/DYNC1LI1/PPP2R5E/RANBP2	6
HIV PPIs	REACTOME_ABC_TRANSPORTER_DISORDERS	REACTOME_ABC_TRANSPORTER_DISORDERS	5/187	78/13356	0.00471822	0.0341714	0.0269097	PSMD11/PSMD7/PSMB6/PSMA1/PSME3	5
HIV PPIs	PID_FOXO_PATHWAY	PID_FOXO_PATHWAY	4/187	49/13356	0.00482434	0.0347294	0.0273491	YWHAE/YWHAZ/YWHAB/YWHAG	4
HIV PPIs	REACTOME_DEFECTIVE_INTRINSIC_PATHWAY_FOR_APOPTOSIS	REACTOME_DEFECTIVE_INTRINSIC_PATHWAY_FOR_APOPTOSIS	3/187	25/13356	0.00495159	0.0348529	0.0274464	APP/YWHAE/CDKN2A	3
HIV PPIs	REACTOME_GAP_FILLING_DNA_REPAIR_SYNTHESIS_AND_LIGATION_IN_GG_NER	REACTOME_GAP_FILLING_DNA_REPAIR_SYNTHESIS_AND_LIGATION_IN_GG_NER	3/187	25/13356	0.00495159	0.0348529	0.0274464	POLE/POLE3/POLE4	3
HIV PPIs	REACTOME_RESOLUTION_OF_AP_SITES_VIA_THE_MULTIPLE_NUCLEOTIDE_PATCH_REPLACEMENT_PATHWAY	REACTOME_RESOLUTION_OF_AP_SITES_VIA_THE_MULTIPLE_NUCLEOTIDE_PATCH_REPLACEMENT_PATHWAY	3/187	25/13356	0.00495159	0.0348529	0.0274464	POLE/POLE3/POLE4	3
HIV PPIs	REACTOME_THE_ROLE_OF_GTSE1_IN_G2_M_PROGRESSION_AFTER_G2_CHECKPOINT	REACTOME_THE_ROLE_OF_GTSE1_IN_G2_M_PROGRESSION_AFTER_G2_CHECKPOINT	5/187	79/13356	0.00498104	0.0348529	0.0274464	PSMD11/PSMD7/PSMB6/PSMA1/PSME3	5
HIV PPIs	REACTOME_HIV_LIFE_CYCLE	REACTOME_HIV_LIFE_CYCLE	7/187	149/13356	0.00498732	0.0348529	0.0274464	NMT1/CCNT1/CDK9/ELOB/ELOC/NEDD4L/RANBP2	7
HIV PPIs	REACTOME_RECRUITMENT_OF_MITOTIC_CENTROSOME_PROTEINS_AND_COMPLEXES	REACTOME_RECRUITMENT_OF_MITOTIC_CENTROSOME_PROTEINS_AND_COMPLEXES	5/187	81/13356	0.00553755	0.037497	0.0295286	YWHAE/YWHAG/SDCCAG8/DYNC1H1/DYNC1I2	5
HIV PPIs	KEGG_SELENOAMINO_ACID_METABOLISM	KEGG_SELENOAMINO_ACID_METABOLISM	3/187	26/13356	0.00554044	0.037497	0.0295286	AHCY/AHCYL1/AHCYL2	3
HIV PPIs	PID_IL3_PATHWAY	PID_IL3_PATHWAY	3/187	26/13356	0.00554044	0.037497	0.0295286	YWHAZ/YWHAG/GRB2	3
HIV PPIs	REACTOME_DOWNREGULATION_OF_TGF_BETA_RECEPTOR_SIGNALING	REACTOME_DOWNREGULATION_OF_TGF_BETA_RECEPTOR_SIGNALING	3/187	26/13356	0.00554044	0.037497	0.0295286	STRAP/STUB1/NEDD4L	3
HIV PPIs	REACTOME_TOLL_LIKE_RECEPTOR_TLR1_TLR2_CASCADE	REACTOME_TOLL_LIKE_RECEPTOR_TLR1_TLR2_CASCADE	6/187	115/13356	0.00555039	0.037497	0.0295286	APP/PPP2CB/FBXW11/BTRC/SKP1/CUL1	6
HIV PPIs	WP_CALCIUM_REGULATION_IN_CARDIAC_CELLS	WP_CALCIUM_REGULATION_IN_CARDIAC_CELLS	7/187	152/13356	0.00555395	0.037497	0.0295286	CALR/YWHAE/YWHAZ/YWHAB/YWHAG/ARRB2/ATP2B1	7
HIV PPIs	REACTOME_REGULATION_OF_HSF1_MEDIATED_HEAT_SHOCK_RESPONSE	REACTOME_REGULATION_OF_HSF1_MEDIATED_HEAT_SHOCK_RESPONSE	5/187	82/13356	0.00583166	0.038932	0.0306586	YWHAE/CCAR2/FKBP4/DNAJC7/RANBP2	5
HIV PPIs	REACTOME_SELECTIVE_AUTOPHAGY	REACTOME_SELECTIVE_AUTOPHAGY	5/187	82/13356	0.00583166	0.038932	0.0306586	TOMM40/SQSTM1/DYNC1H1/DYNC1I2/DYNC1LI1	5
HIV PPIs	REACTOME_SARS_COV_1_INFECTION	REACTOME_SARS_COV_1_INFECTION	4/187	52/13356	0.00596766	0.0396187	0.0311994	GANAB/PRKCSH/PARP4/MOGS	4
HIV PPIs	WP_INTRAFLAGELLAR_TRANSPORT_PROTEINS_BINDING_TO_DYNEIN	WP_INTRAFLAGELLAR_TRANSPORT_PROTEINS_BINDING_TO_DYNEIN	3/187	27/13356	0.00616955	0.0407327	0.0320766	DYNC1H1/DYNC1I2/DYNC1LI1	3
HIV PPIs	PID_NFAT_3PATHWAY	PID_NFAT_3PATHWAY	4/187	53/13356	0.0063855	0.0419268	0.033017	YWHAE/YWHAZ/YWHAB/YWHAG	4
HIV PPIs	REACTOME_GLOBAL_GENOME_NUCLEOTIDE_EXCISION_REPAIR_GG_NER	REACTOME_GLOBAL_GENOME_NUCLEOTIDE_EXCISION_REPAIR_GG_NER	5/187	84/13356	0.00645261	0.0421359	0.0331817	RUVBL1/POLE/POLE3/POLE4/DDB1	5
HIV PPIs	WP_DNA_REPAIR_PATHWAYS_FULL_NETWORK	WP_DNA_REPAIR_PATHWAYS_FULL_NETWORK	6/187	120/13356	0.00680598	0.0442019	0.0348086	POLE/POLE3/MSH2/POLE4/MPG/DDB1	6
HIV PPIs	REACTOME_SIGNALING_BY_TGFB_FAMILY_MEMBERS	REACTOME_SIGNALING_BY_TGFB_FAMILY_MEMBERS	6/187	122/13356	0.00736175	0.0475529	0.0374475	STRAP/CCNT1/CDK9/STUB1/NEDD4L/NEDD8	6
HIV PPIs	PID_IGF1_PATHWAY	PID_IGF1_PATHWAY	3/187	29/13356	0.00755125	0.0482553	0.0380007	YWHAE/YWHAZ/GRB2	3
HIV PPIs	REACTOME_RIPK1_MEDIATED_REGULATED_NECROSIS	REACTOME_RIPK1_MEDIATED_REGULATED_NECROSIS	3/187	29/13356	0.00755125	0.0482553	0.0380007	FLOT1/SDCBP/STUB1	3
HIV PPIs	REACTOME_SIGNALING_BY_NOTCH	REACTOME_SIGNALING_BY_NOTCH	9/187	247/13356	0.00804874	0.0511609	0.0402888	PSMD11/PSMD7/PSMB6/PSMA1/YWHAZ/ARRB2/PSME3/SKP1/CUL1	9
HIV PPIs	BIOCARTA_SKP2E2F_PATHWAY	BIOCARTA_SKP2E2F_PATHWAY	2/187	10/13356	0.00814959	0.0512566	0.0403642	SKP1/CUL1	2
HIV PPIs	REACTOME_RUNX3_REGULATES_P14_ARF	REACTOME_RUNX3_REGULATES_P14_ARF	2/187	10/13356	0.00814959	0.0512566	0.0403642	CDKN2A/CBFB	2
HIV PPIs	REACTOME_HSP90_CHAPERONE_CYCLE_FOR_STEROID_HORMONE_RECEPTORS_SHR_IN_THE_PRESENCE_OF_LIGAND	REACTOME_HSP90_CHAPERONE_CYCLE_FOR_STEROID_HORMONE_RECEPTORS_SHR_IN_THE_PRESENCE_OF_LIGAND	4/187	57/13356	0.00825014	0.0516174	0.0406483	FKBP4/DYNC1H1/DYNC1I2/DYNC1LI1	4
HIV PPIs	REACTOME_RESOLUTION_OF_SISTER_CHROMATID_COHESION	REACTOME_RESOLUTION_OF_SISTER_CHROMATID_COHESION	6/187	126/13356	0.00857058	0.0533429	0.0420071	PPP2CB/DYNC1H1/DYNC1I2/DYNC1LI1/PPP2R5E/RANBP2	6
HIV PPIs	REACTOME_RESPIRATORY_ELECTRON_TRANSPORT_ATP_SYNTHESIS_BY_CHEMIOSMOTIC_COUPLING_AND_HEAT_PRODUCTION_BY_UNCOUPLING_PROTEINS	REACTOME_RESPIRATORY_ELECTRON_TRANSPORT_ATP_SYNTHESIS_BY_CHEMIOSMOTIC_COUPLING_AND_HEAT_PRODUCTION_BY_UNCOUPLING_PROTEINS	6/187	127/13356	0.00889378	0.0550677	0.0433653	COX4I1/COX6B1/NDUFB10/COX5A/NDUFS8/LRPPRC	6
HIV PPIs	WP_TNFALPHA_SIGNALING_PATHWAY	WP_TNFALPHA_SIGNALING_PATHWAY	5/187	92/13356	0.00940223	0.0579158	0.0456082	GRB2/FBXW11/BTRC/SKP1/CUL1	5
HIV PPIs	PID_PDGFRB_PATHWAY	PID_PDGFRB_PATHWAY	6/187	129/13356	0.00956622	0.0586238	0.0461657	EIF2AK2/YWHAE/YWHAZ/YWHAB/YWHAG/GRB2	6
HIV PPIs	REACTOME_MAPK6_MAPK4_SIGNALING	REACTOME_MAPK6_MAPK4_SIGNALING	5/187	93/13356	0.00982655	0.0591032	0.0465433	PSMD11/PSMD7/PSMB6/PSMA1/PSME3	5
HIV PPIs	REACTOME_MITOCHONDRIAL_FATTY_ACID_BETA_OXIDATION_OF_SATURATED_FATTY_ACIDS	REACTOME_MITOCHONDRIAL_FATTY_ACID_BETA_OXIDATION_OF_SATURATED_FATTY_ACIDS	2/187	11/13356	0.00986944	0.0591032	0.0465433	HADHA/HADHB	2
HIV PPIs	REACTOME_REGULATION_OF_BACH1_ACTIVITY	REACTOME_REGULATION_OF_BACH1_ACTIVITY	2/187	11/13356	0.00986944	0.0591032	0.0465433	SKP1/CUL1	2
HIV PPIs	KEGG_PARKINSONS_DISEASE	KEGG_PARKINSONS_DISEASE	6/187	130/13356	0.00991572	0.0591032	0.0465433	COX4I1/COX6B1/NDUFB10/COX5A/UBA1/NDUFS8	6
HIV PPIs	REACTOME_RUNX1_REGULATES_TRANSCRIPTION_OF_GENES_INVOLVED_IN_DIFFERENTIATION_OF_HSCS	REACTOME_RUNX1_REGULATES_TRANSCRIPTION_OF_GENES_INVOLVED_IN_DIFFERENTIATION_OF_HSCS	6/187	130/13356	0.00991572	0.0591032	0.0465433	PSMD11/PSMD7/PSMB6/PSMA1/CBFB/PSME3	6
HIV PPIs	REACTOME_TERMINATION_OF_TRANSLESION_DNA_SYNTHESIS	REACTOME_TERMINATION_OF_TRANSLESION_DNA_SYNTHESIS	3/187	32/13356	0.00994121	0.0591032	0.0465433	POLE/POLE3/POLE4	3
HIV PPIs	REACTOME_G2_M_DNA_DAMAGE_CHECKPOINT	REACTOME_G2_M_DNA_DAMAGE_CHECKPOINT	5/187	94/13356	0.0102639	0.0604202	0.0475804	YWHAE/YWHAZ/YWHAB/YWHAG/HERC2	5
HIV PPIs	REACTOME_RHO_GTPASES_ACTIVATE_PKNS	REACTOME_RHO_GTPASES_ACTIVATE_PKNS	5/187	94/13356	0.0102639	0.0604202	0.0475804	YWHAE/YWHAZ/YWHAB/YWHAG/PPP1R12A	5
HIV PPIs	REACTOME_RECRUITMENT_OF_NUMA_TO_MITOTIC_CENTROSOMES	REACTOME_RECRUITMENT_OF_NUMA_TO_MITOTIC_CENTROSOMES	5/187	95/13356	0.0107143	0.0627629	0.0494252	YWHAE/YWHAG/SDCCAG8/DYNC1H1/DYNC1I2	5
HIV PPIs	WP_16P112_DISTAL_DELETION_SYNDROME	WP_16P112_DISTAL_DELETION_SYNDROME	3/187	33/13356	0.0108245	0.0630989	0.0496898	PRMT1/SDCCAG8/GRB2	3
HIV PPIs	REACTOME_PLATELET_ACTIVATION_SIGNALING_AND_AGGREGATION	REACTOME_PLATELET_ACTIVATION_SIGNALING_AND_AGGREGATION	9/187	261/13356	0.0112968	0.064716	0.0509633	CALU/APP/ENDOD1/YWHAZ/LGALS3BP/ARRB2/GRB2/CYB5R1/DAGLB	9
HIV PPIs	REACTOME_ANCHORING_OF_THE_BASAL_BODY_TO_THE_PLASMA_MEMBRANE	REACTOME_ANCHORING_OF_THE_BASAL_BODY_TO_THE_PLASMA_MEMBRANE	5/187	97/13356	0.0116555	0.064716	0.0509633	YWHAE/YWHAG/SDCCAG8/DYNC1H1/DYNC1I2	5
HIV PPIs	REACTOME_SIGNALING_BY_ROBO_RECEPTORS	REACTOME_SIGNALING_BY_ROBO_RECEPTORS	8/187	218/13356	0.0117215	0.064716	0.0509633	PSMD11/PSMD7/PSMB6/PSMA1/ELOB/ELOC/PSME3/CUL2	8
HIV PPIs	WP_VALPROIC_ACID_PATHWAY	WP_VALPROIC_ACID_PATHWAY	2/187	12/13356	0.0117351	0.064716	0.0509633	HADHA/HADHB	2
HIV PPIs	KEGG_CYSTEINE_AND_METHIONINE_METABOLISM	KEGG_CYSTEINE_AND_METHIONINE_METABOLISM	3/187	34/13356	0.0117518	0.064716	0.0509633	AHCY/AHCYL1/AHCYL2	3
HIV PPIs	PID_HDAC_CLASSII_PATHWAY	PID_HDAC_CLASSII_PATHWAY	3/187	34/13356	0.0117518	0.064716	0.0509633	YWHAE/YWHAB/RANBP2	3
HIV PPIs	PID_HIF2PATHWAY	PID_HIF2PATHWAY	3/187	34/13356	0.0117518	0.064716	0.0509633	EIF3E/ELOB/ELOC	3
HIV PPIs	REACTOME_RAF_ACTIVATION	REACTOME_RAF_ACTIVATION	3/187	34/13356	0.0117518	0.064716	0.0509633	YWHAB/PPP2CB/PPP2R5E	3
HIV PPIs	REACTOME_SYNTHESIS_OF_BILE_ACIDS_AND_BILE_SALTS	REACTOME_SYNTHESIS_OF_BILE_ACIDS_AND_BILE_SALTS	3/187	34/13356	0.0117518	0.064716	0.0509633	ACOT8/OSBPL3/OSBPL6	3
HIV PPIs	WP_FATTY_ACID_BETAOXIDATION	WP_FATTY_ACID_BETAOXIDATION	3/187	34/13356	0.0117518	0.064716	0.0509633	HADHA/HADHB/ACSL3	3
HIV PPIs	WP_MITOCHONDRIAL_COMPLEX_IV_ASSEMBLY	WP_MITOCHONDRIAL_COMPLEX_IV_ASSEMBLY	3/187	34/13356	0.0117518	0.064716	0.0509633	COX4I1/COX6B1/COX5A	3
HIV PPIs	WP_TYPE_2_PAPILLARY_RENAL_CELL_CARCINOMA	WP_TYPE_2_PAPILLARY_RENAL_CELL_CARCINOMA	3/187	34/13356	0.0117518	0.064716	0.0509633	ELOB/ELOC/CUL2	3
HIV PPIs	REACTOME_CYTOPROTECTION_BY_HMOX1	REACTOME_CYTOPROTECTION_BY_HMOX1	4/187	64/13356	0.012308	0.0672338	0.0529461	COX4I1/COX6B1/COX5A/LRPPRC	4
HIV PPIs	REACTOME_DISORDERS_OF_TRANSMEMBRANE_TRANSPORTERS	REACTOME_DISORDERS_OF_TRANSMEMBRANE_TRANSPORTERS	7/187	177/13356	0.0123215	0.0672338	0.0529461	PSMD11/PSMD7/PSMB6/PSMA1/PSME3/SLC27A4/RANBP2	7
HIV PPIs	REACTOME_UB_SPECIFIC_PROCESSING_PROTEASES	REACTOME_UB_SPECIFIC_PROCESSING_PROTEASES	8/187	221/13356	0.0126484	0.0685576	0.0539885	PSMD11/PSMD7/PSMB6/PSMA1/RUVBL1/ARRB2/USP11/PSME3	8
HIV PPIs	REACTOME_THE_CITRIC_ACID_TCA_CYCLE_AND_RESPIRATORY_ELECTRON_TRANSPORT	REACTOME_THE_CITRIC_ACID_TCA_CYCLE_AND_RESPIRATORY_ELECTRON_TRANSPORT	7/187	178/13356	0.0126789	0.0685576	0.0539885	COX4I1/COX6B1/NDUFB10/COX5A/SUCLA2/NDUFS8/LRPPRC	7
HIV PPIs	REACTOME_DUAL_INCISION_IN_TC_NER	REACTOME_DUAL_INCISION_IN_TC_NER	4/187	65/13356	0.012975	0.0698431	0.0550009	POLE/POLE3/POLE4/DDB1	4
HIV PPIs	REACTOME_CELLULAR_RESPONSE_TO_HEAT_STRESS	REACTOME_CELLULAR_RESPONSE_TO_HEAT_STRESS	5/187	101/13356	0.0137035	0.0726626	0.0572212	YWHAE/CCAR2/FKBP4/DNAJC7/RANBP2	5
HIV PPIs	REACTOME_ADVANCED_GLYCOSYLATION_ENDPRODUCT_RECEPTOR_SIGNALING	REACTOME_ADVANCED_GLYCOSYLATION_ENDPRODUCT_RECEPTOR_SIGNALING	2/187	13/13356	0.013742	0.0726626	0.0572212	PRKCSH/APP	2
HIV PPIs	REACTOME_CYTOSOLIC_IRON_SULFUR_CLUSTER_ASSEMBLY	REACTOME_CYTOSOLIC_IRON_SULFUR_CLUSTER_ASSEMBLY	2/187	13/13356	0.013742	0.0726626	0.0572212	CIAO2B/CIAO1	2
HIV PPIs	WP_DOPAMINE_METABOLISM	WP_DOPAMINE_METABOLISM	2/187	13/13356	0.013742	0.0726626	0.0572212	PPP2CB/COMT	2
HIV PPIs	REACTOME_RHO_GTPASES_ACTIVATE_FORMINS	REACTOME_RHO_GTPASES_ACTIVATE_FORMINS	6/187	140/13356	0.0139253	0.0733075	0.057729	PPP2CB/DYNC1H1/DYNC1I2/DYNC1LI1/PPP2R5E/RANBP2	6
HIV PPIs	REACTOME_COLLAGEN_BIOSYNTHESIS_AND_MODIFYING_ENZYMES	REACTOME_COLLAGEN_BIOSYNTHESIS_AND_MODIFYING_ENZYMES	4/187	67/13356	0.0143773	0.0753549	0.0593414	P4HA2/P4HB/PLOD1/PLOD2	4
HIV PPIs	WP_ELECTRON_TRANSPORT_CHAIN_OXPHOS_SYSTEM_IN_MITOCHONDRIA	WP_ELECTRON_TRANSPORT_CHAIN_OXPHOS_SYSTEM_IN_MITOCHONDRIA	5/187	103/13356	0.0148131	0.0772996	0.0608728	COX4I1/COX6B1/NDUFB10/COX5A/NDUFS8	5
HIV PPIs	REACTOME_TRANSPORT_TO_THE_GOLGI_AND_SUBSEQUENT_MODIFICATION	REACTOME_TRANSPORT_TO_THE_GOLGI_AND_SUBSEQUENT_MODIFICATION	7/187	186/13356	0.0158112	0.0818273	0.0644383	LMAN1/FUT8/LMAN2/TMED9/DYNC1H1/DYNC1I2/DYNC1LI1	7
HIV PPIs	PID_IL5_PATHWAY	PID_IL5_PATHWAY	2/187	14/13356	0.0158861	0.0818273	0.0644383	SDCBP/GRB2	2
HIV PPIs	REACTOME_METHYLATION	REACTOME_METHYLATION	2/187	14/13356	0.0158861	0.0818273	0.0644383	AHCY/COMT	2
HIV PPIs	PID_ERBB1_DOWNSTREAM_PATHWAY	PID_ERBB1_DOWNSTREAM_PATHWAY	5/187	105/13356	0.0159813	0.0819642	0.0645461	YWHAE/YWHAZ/YWHAB/YWHAG/GRB2	5
HIV PPIs	REACTOME_TRANSCRIPTION_OF_THE_HIV_GENOME	REACTOME_TRANSCRIPTION_OF_THE_HIV_GENOME	4/187	70/13356	0.0166548	0.0850533	0.0669788	CCNT1/CDK9/ELOB/ELOC	4
HIV PPIs	REACTOME_BETA_CATENIN_INDEPENDENT_WNT_SIGNALING	REACTOME_BETA_CATENIN_INDEPENDENT_WNT_SIGNALING	6/187	146/13356	0.0168113	0.0852943	0.0671685	PSMD11/PSMD7/PSMB6/PSMA1/ARRB2/PSME3	6
HIV PPIs	REACTOME_MAPK_FAMILY_SIGNALING_CASCADES	REACTOME_MAPK_FAMILY_SIGNALING_CASCADES	10/187	327/13356	0.0168969	0.0852943	0.0671685	PSMD11/PSMD7/PSMB6/PSMA1/YWHAB/PPP2CB/ARRB2/GRB2/PSME3/PPP2R5E	10
HIV PPIs	PID_ATR_PATHWAY	PID_ATR_PATHWAY	3/187	39/13356	0.0170589	0.0852943	0.0671685	YWHAZ/YWHAB/FBXW11	3
HIV PPIs	REACTOME_ASSOCIATION_OF_TRIC_CCT_WITH_TARGET_PROTEINS_DURING_BIOSYNTHESIS	REACTOME_ASSOCIATION_OF_TRIC_CCT_WITH_TARGET_PROTEINS_DURING_BIOSYNTHESIS	3/187	39/13356	0.0170589	0.0852943	0.0671685	FBXO6/USP11/ARFGEF2	3
HIV PPIs	REACTOME_TRANSLESION_SYNTHESIS_BY_Y_FAMILY_DNA_POLYMERASES_BYPASSES_LESIONS_ON_DNA_TEMPLATE	REACTOME_TRANSLESION_SYNTHESIS_BY_Y_FAMILY_DNA_POLYMERASES_BYPASSES_LESIONS_ON_DNA_TEMPLATE	3/187	39/13356	0.0170589	0.0852943	0.0671685	POLE/POLE3/POLE4	3
HIV PPIs	REACTOME_MATURATION_OF_SARSCOV2_NUCLEOPROTEIN	REACTOME_MATURATION_OF_SARSCOV2_NUCLEOPROTEIN	2/187	15/13356	0.0181632	0.0900621	0.0709232	PRMT1/PARP4	2
HIV PPIs	REACTOME_SIGNALING_BY_CTNNB1_PHOSPHO_SITE_MUTANTS	REACTOME_SIGNALING_BY_CTNNB1_PHOSPHO_SITE_MUTANTS	2/187	15/13356	0.0181632	0.0900621	0.0709232	PPP2CB/PPP2R5E	2
HIV PPIs	REACTOME_TRANSLOCATION_OF_SLC2A4_GLUT4_TO_THE_PLASMA_MEMBRANE	REACTOME_TRANSLOCATION_OF_SLC2A4_GLUT4_TO_THE_PLASMA_MEMBRANE	4/187	72/13356	0.0182916	0.0903244	0.0711298	YWHAE/YWHAZ/YWHAB/YWHAG	4
HIV PPIs	REACTOME_NUCLEOTIDE_EXCISION_REPAIR	REACTOME_NUCLEOTIDE_EXCISION_REPAIR	5/187	110/13356	0.0191666	0.0942555	0.0742254	RUVBL1/POLE/POLE3/POLE4/DDB1	5
HIV PPIs	KEGG_AMINOACYL_TRNA_BIOSYNTHESIS	KEGG_AMINOACYL_TRNA_BIOSYNTHESIS	3/187	41/13356	0.0194987	0.0951709	0.0749463	SEPSECS/NARS2/HARS2	3
HIV PPIs	REACTOME_AUTOPHAGY	REACTOME_AUTOPHAGY	6/187	151/13356	0.019512	0.0951709	0.0749463	TOMM40/AMBRA1/SQSTM1/DYNC1H1/DYNC1I2/DYNC1LI1	6
HIV PPIs	REACTOME_RAP1_SIGNALLING	REACTOME_RAP1_SIGNALLING	2/187	16/13356	0.020569	0.0991126	0.0780504	YWHAZ/YWHAB	2
HIV PPIs	REACTOME_SPRY_REGULATION_OF_FGF_SIGNALING	REACTOME_SPRY_REGULATION_OF_FGF_SIGNALING	2/187	16/13356	0.020569	0.0991126	0.0780504	PPP2CB/GRB2	2
HIV PPIs	WP_INTERACTOME_OF_POLYCOMB_REPRESSIVE_COMPLEX_2_PRC2	WP_INTERACTOME_OF_POLYCOMB_REPRESSIVE_COMPLEX_2_PRC2	2/187	16/13356	0.020569	0.0991126	0.0780504	THRAP3/RBBP7	2
HIV PPIs	KEGG_FATTY_ACID_METABOLISM	KEGG_FATTY_ACID_METABOLISM	3/187	42/13356	0.0207871	0.0993626	0.0782472	HADHA/HADHB/ACSL3	3
HIV PPIs	PID_TCPTP_PATHWAY	PID_TCPTP_PATHWAY	3/187	42/13356	0.0207871	0.0993626	0.0782472	EIF2AK2/LMAN1/GRB2	3
HIV PPIs	WP_NUCLEOTIDE_EXCISION_REPAIR_IN_XERODERMA_PIGMENTOSUM	WP_NUCLEOTIDE_EXCISION_REPAIR_IN_XERODERMA_PIGMENTOSUM	4/187	75/13356	0.0209286	0.0996402	0.0784658	POLE/POLE3/POLE4/DDB1	4
HIV PPIs	REACTOME_ER_TO_GOLGI_ANTEROGRADE_TRANSPORT	REACTOME_ER_TO_GOLGI_ANTEROGRADE_TRANSPORT	6/187	155/13356	0.0218752	0.103733	0.0816892	LMAN1/LMAN2/TMED9/DYNC1H1/DYNC1I2/DYNC1LI1	6
HIV PPIs	REACTOME_NEGATIVE_REGULATION_OF_MAPK_PATHWAY	REACTOME_NEGATIVE_REGULATION_OF_MAPK_PATHWAY	3/187	43/13356	0.0221213	0.104486	0.0822818	YWHAB/PPP2CB/PPP2R5E	3
HIV PPIs	BIOCARTA_ARAP_PATHWAY	BIOCARTA_ARAP_PATHWAY	2/187	17/13356	0.0230996	0.10659	0.0839387	ARFGEF1/ARFGEF2	2
HIV PPIs	REACTOME_BETA_CATENIN_PHOSPHORYLATION_CASCADE	REACTOME_BETA_CATENIN_PHOSPHORYLATION_CASCADE	2/187	17/13356	0.0230996	0.10659	0.0839387	PPP2CB/PPP2R5E	2
HIV PPIs	REACTOME_PLATELET_SENSITIZATION_BY_LDL	REACTOME_PLATELET_SENSITIZATION_BY_LDL	2/187	17/13356	0.0230996	0.10659	0.0839387	PPP2CB/PPP2R5E	2
HIV PPIs	WP_IL9_SIGNALING_PATHWAY	WP_IL9_SIGNALING_PATHWAY	2/187	17/13356	0.0230996	0.10659	0.0839387	GRB2/CDK9	2
HIV PPIs	WP_MITOCHONDRIAL_LONG_CHAIN_FATTY_ACID_BETAOXIDATION	WP_MITOCHONDRIAL_LONG_CHAIN_FATTY_ACID_BETAOXIDATION	2/187	17/13356	0.0230996	0.10659	0.0839387	HADHA/ACSL3	2
HIV PPIs	WP_CIRCADIAN_RHYTHM_GENES	WP_CIRCADIAN_RHYTHM_GENES	7/187	201/13356	0.0231019	0.10659	0.0839387	THRAP3/CCAR2/AHCY/FBXW11/BTRC/SKP1/CUL1	7
HIV PPIs	KEGG_LYSINE_DEGRADATION	KEGG_LYSINE_DEGRADATION	3/187	44/13356	0.0235012	0.106783	0.0840906	PLOD1/PLOD2/HADHA	3
HIV PPIs	KEGG_VASOPRESSIN_REGULATED_WATER_REABSORPTION	KEGG_VASOPRESSIN_REGULATED_WATER_REABSORPTION	3/187	44/13356	0.0235012	0.106783	0.0840906	DYNC1H1/DYNC1I2/DYNC1LI1	3
HIV PPIs	REACTOME_AGGREPHAGY	REACTOME_AGGREPHAGY	3/187	44/13356	0.0235012	0.106783	0.0840906	DYNC1H1/DYNC1I2/DYNC1LI1	3
HIV PPIs	WP_VASOPRESSINREGULATED_WATER_REABSORPTION	WP_VASOPRESSINREGULATED_WATER_REABSORPTION	3/187	44/13356	0.0235012	0.106783	0.0840906	DYNC1H1/DYNC1I2/DYNC1LI1	3
HIV PPIs	KEGG_PEROXISOME	KEGG_PEROXISOME	4/187	78/13356	0.0237876	0.107269	0.0844731	ACOT8/AGPS/ABCD3/ACSL3	4
HIV PPIs	REACTOME_TRANSCRIPTION_COUPLED_NUCLEOTIDE_EXCISION_REPAIR_TC_NER	REACTOME_TRANSCRIPTION_COUPLED_NUCLEOTIDE_EXCISION_REPAIR_TC_NER	4/187	78/13356	0.0237876	0.107269	0.0844731	POLE/POLE3/POLE4/DDB1	4
HIV PPIs	WP_SUDDEN_INFANT_DEATH_SYNDROME_SIDS_SUSCEPTIBILITY_PATHWAYS	WP_SUDDEN_INFANT_DEATH_SYNDROME_SIDS_SUSCEPTIBILITY_PATHWAYS	6/187	159/13356	0.0244247	0.109728	0.0864095	YWHAE/YWHAZ/YWHAB/YWHAG/HADHA/HADHB	6
HIV PPIs	REACTOME_BILE_ACID_AND_BILE_SALT_METABOLISM	REACTOME_BILE_ACID_AND_BILE_SALT_METABOLISM	3/187	45/13356	0.0249268	0.111435	0.0877541	ACOT8/OSBPL3/OSBPL6	3
HIV PPIs	REACTOME_DEUBIQUITINATION	REACTOME_DEUBIQUITINATION	9/187	299/13356	0.0250063	0.111435	0.0877541	PSMD11/PSMD7/PSMB6/PSMA1/RUVBL1/ARRB2/USP11/PSME3/NEDD8	9
HIV PPIs	REACTOME_SELENOAMINO_ACID_METABOLISM	REACTOME_SELENOAMINO_ACID_METABOLISM	5/187	118/13356	0.0250845	0.111435	0.0877541	SEPSECS/AIMP1/AIMP2/EEF1E1/AHCY	5
HIV PPIs	PID_BETA_CATENIN_DEG_PATHWAY	PID_BETA_CATENIN_DEG_PATHWAY	2/187	18/13356	0.0257511	0.113552	0.0894212	SKP1/CUL1	2
HIV PPIs	WP_FATTY_ACID_TRANSPORTERS	WP_FATTY_ACID_TRANSPORTERS	2/187	18/13356	0.0257511	0.113552	0.0894212	ACSL3/SLC27A4	2
HIV PPIs	KEGG_N_GLYCAN_BIOSYNTHESIS	KEGG_N_GLYCAN_BIOSYNTHESIS	3/187	46/13356	0.0263981	0.115977	0.0913307	GANAB/FUT8/MOGS	3
HIV PPIs	WP_DNA_IRDAMAGE_AND_CELLULAR_RESPONSE_VIA_ATR	WP_DNA_IRDAMAGE_AND_CELLULAR_RESPONSE_VIA_ATR	4/187	81/13356	0.0268724	0.117628	0.0926313	EEF1E1/RECQL/HERC2/MSH2	4
HIV PPIs	REACTOME_NUCLEAR_EVENTS_STIMULATED_BY_ALK_SIGNALING_IN_CANCER	REACTOME_NUCLEAR_EVENTS_STIMULATED_BY_ALK_SIGNALING_IN_CANCER	2/187	19/13356	0.0285196	0.124383	0.0979506	SKP1/CUL1	2
HIV PPIs	KEGG_ALZHEIMERS_DISEASE	KEGG_ALZHEIMERS_DISEASE	6/187	166/13356	0.0293511	0.127082	0.100076	COX4I1/APP/COX6B1/NDUFB10/COX5A/NDUFS8	6
HIV PPIs	REACTOME_TOLL_LIKE_RECEPTOR_CASCADES	REACTOME_TOLL_LIKE_RECEPTOR_CASCADES	6/187	166/13356	0.0293511	0.127082	0.100076	APP/PPP2CB/FBXW11/BTRC/SKP1/CUL1	6
HIV PPIs	PID_HEDGEHOG_GLI_PATHWAY	PID_HEDGEHOG_GLI_PATHWAY	3/187	48/13356	0.0294774	0.127168	0.100144	ARRB2/RBBP7/FBXW11	3
HIV PPIs	REACTOME_REGULATION_OF_INSULIN_LIKE_GROWTH_FACTOR_IGF_TRANSPORT_AND_UPTAKE_BY_INSULIN_LIKE_GROWTH_FACTOR_BINDING_PROTEINS_IGFBPS	REACTOME_REGULATION_OF_INSULIN_LIKE_GROWTH_FACTOR_IGF_TRANSPORT_AND_UPTAKE_BY_INSULIN_LIKE_GROWTH_FACTOR_BINDING_PROTEINS_IGFBPS	5/187	124/13356	0.0302174	0.129891	0.102288	PRKCSH/CALU/P4HB/APP/RCN1	5
HIV PPIs	REACTOME_CLASS_I_PEROXISOMAL_MEMBRANE_PROTEIN_IMPORT	REACTOME_CLASS_I_PEROXISOMAL_MEMBRANE_PROTEIN_IMPORT	2/187	20/13356	0.0314014	0.134017	0.105537	ABCD3/ACBD5	2
HIV PPIs	REACTOME_SIGNALING_BY_HIPPO	REACTOME_SIGNALING_BY_HIPPO	2/187	20/13356	0.0314014	0.134017	0.105537	YWHAE/YWHAB	2
HIV PPIs	KEGG_NEUROTROPHIN_SIGNALING_PATHWAY	KEGG_NEUROTROPHIN_SIGNALING_PATHWAY	5/187	126/13356	0.0320647	0.136361	0.107383	YWHAE/YWHAZ/YWHAB/YWHAG/GRB2	5
HIV PPIs	REACTOME_SIGNALING_BY_ERBB2	REACTOME_SIGNALING_BY_ERBB2	3/187	50/13356	0.0327382	0.138731	0.10925	GRB2/STUB1/CUL5	3
HIV PPIs	REACTOME_CTLA4_INHIBITORY_SIGNALING	REACTOME_CTLA4_INHIBITORY_SIGNALING	2/187	21/13356	0.0343928	0.144391	0.113707	PPP2CB/PPP2R5E	2
HIV PPIs	REACTOME_MITOCHONDRIAL_TRNA_AMINOACYLATION	REACTOME_MITOCHONDRIAL_TRNA_AMINOACYLATION	2/187	21/13356	0.0343928	0.144391	0.113707	NARS2/HARS2	2
HIV PPIs	REACTOME_TRANSCRIPTIONAL_ACTIVITY_OF_SMAD2_SMAD3_SMAD4_HETEROTRIMER	REACTOME_TRANSCRIPTIONAL_ACTIVITY_OF_SMAD2_SMAD3_SMAD4_HETEROTRIMER	3/187	51/13356	0.0344363	0.144391	0.113707	CCNT1/CDK9/NEDD4L	3
HIV PPIs	REACTOME_METABOLISM_OF_AMINO_ACIDS_AND_DERIVATIVES	REACTOME_METABOLISM_OF_AMINO_ACIDS_AND_DERIVATIVES	10/187	373/13356	0.037246	0.155626	0.122554	SEPSECS/PSMD11/PSMD7/PSMB6/PSMA1/AIMP1/AIMP2/EEF1E1/AHCY/PSME3	10
HIV PPIs	REACTOME_PINK1_PRKN_MEDIATED_MITOPHAGY	REACTOME_PINK1_PRKN_MEDIATED_MITOPHAGY	2/187	22/13356	0.0374902	0.155636	0.122562	TOMM40/SQSTM1	2
HIV PPIs	REACTOME_COLLAGEN_FORMATION	REACTOME_COLLAGEN_FORMATION	4/187	90/13356	0.0375089	0.155636	0.122562	P4HA2/P4HB/PLOD1/PLOD2	4
HIV PPIs	REACTOME_COPI_INDEPENDENT_GOLGI_TO_ER_RETROGRADE_TRAFFIC	REACTOME_COPI_INDEPENDENT_GOLGI_TO_ER_RETROGRADE_TRAFFIC	3/187	53/13356	0.037967	0.156149	0.122966	DYNC1H1/DYNC1I2/DYNC1LI1	3
HIV PPIs	KEGG_OXIDATIVE_PHOSPHORYLATION	KEGG_OXIDATIVE_PHOSPHORYLATION	5/187	132/13356	0.0380247	0.156149	0.122966	COX4I1/COX6B1/NDUFB10/COX5A/NDUFS8	5
HIV PPIs	REACTOME_RESPONSE_TO_ELEVATED_PLATELET_CYTOSOLIC_CA2	REACTOME_RESPONSE_TO_ELEVATED_PLATELET_CYTOSOLIC_CA2	5/187	132/13356	0.0380247	0.156149	0.122966	CALU/APP/ENDOD1/LGALS3BP/CYB5R1	5
HIV PPIs	REACTOME_FATTY_ACID_METABOLISM	REACTOME_FATTY_ACID_METABOLISM	6/187	177/13356	0.0383404	0.156907	0.123563	PON2/ACOT8/ACBD5/HADHA/HADHB/ACSL3	6
HIV PPIs	REACTOME_BASE_EXCISION_REPAIR	REACTOME_BASE_EXCISION_REPAIR	4/187	91/13356	0.0388201	0.158328	0.124682	POLE/POLE3/POLE4/MPG	4
HIV PPIs	KEGG_MISMATCH_REPAIR	KEGG_MISMATCH_REPAIR	2/187	23/13356	0.0406901	0.164829	0.129802	MSH2/SSBP1	2
HIV PPIs	WP_SPHINGOLIPID_METABOLISM_OVERVIEW	WP_SPHINGOLIPID_METABOLISM_OVERVIEW	2/187	23/13356	0.0406901	0.164829	0.129802	SGPL1/CERS2	2
HIV PPIs	REACTOME_REGULATED_NECROSIS	REACTOME_REGULATED_NECROSIS	3/187	56/13356	0.0435952	0.176001	0.138599	FLOT1/SDCBP/STUB1	3
HIV PPIs	REACTOME_HCMV_EARLY_EVENTS	REACTOME_HCMV_EARLY_EVENTS	5/187	138/13356	0.0446212	0.179536	0.141383	DYNC1H1/RBBP7/DYNC1I2/DYNC1LI1/RANBP2	5
HIV PPIs	PID_MYC_PATHWAY	PID_MYC_PATHWAY	2/187	25/13356	0.0473835	0.190011	0.149632	CDKN2A/RUVBL1	2
HIV PPIs	REACTOME_IRON_UPTAKE_AND_TRANSPORT	REACTOME_IRON_UPTAKE_AND_TRANSPORT	3/187	58/13356	0.0475657	0.190104	0.149705	SKP1/CUL1/NEDD8	3
HIV PPIs	REACTOME_PROTEIN_FOLDING	REACTOME_PROTEIN_FOLDING	4/187	98/13356	0.0487261	0.194092	0.152846	FBXO6/VBP1/USP11/ARFGEF2	4
HIV PPIs	PID_P53_REGULATION_PATHWAY	PID_P53_REGULATION_PATHWAY	3/187	59/13356	0.0496155	0.196978	0.155119	CDKN2A/HUWE1/NEDD8	3
HIV PPIs	WP_SPHINGOLIPID_METABOLISM_INTEGRATED_PATHWAY	WP_SPHINGOLIPID_METABOLISM_INTEGRATED_PATHWAY	2/187	26/13356	0.0508704	0.201292	0.158516	SGPL1/CERS2	2
HIV PPIs	REACTOME_TRANSCRIPTIONAL_REGULATION_BY_RUNX1	REACTOME_TRANSCRIPTIONAL_REGULATION_BY_RUNX1	7/187	239/13356	0.051175	0.201829	0.158939	PRMT1/PSMD11/PSMD7/PSMB6/PSMA1/CBFB/PSME3	7
HIV PPIs	REACTOME_RRNA_MODIFICATION_IN_THE_NUCLEUS_AND_CYTOSOL	REACTOME_RRNA_MODIFICATION_IN_THE_NUCLEUS_AND_CYTOSOL	3/187	60/13356	0.0517078	0.203259	0.160065	DDX49/HEATR1/SNU13	3
HIV PPIs	PID_TRKR_PATHWAY	PID_TRKR_PATHWAY	3/187	61/13356	0.0538424	0.210956	0.166126	GRB2/SQSTM1/NEDD4L	3
HIV PPIs	WP_PHOTODYNAMIC_THERAPYINDUCED_UNFOLDED_PROTEIN_RESPONSE	WP_PHOTODYNAMIC_THERAPYINDUCED_UNFOLDED_PROTEIN_RESPONSE	2/187	27/13356	0.0544465	0.212626	0.167441	DNAJB11/CALR	2
HIV PPIs	REACTOME_COPI_MEDIATED_ANTEROGRADE_TRANSPORT	REACTOME_COPI_MEDIATED_ANTEROGRADE_TRANSPORT	4/187	102/13356	0.0549567	0.213919	0.16846	TMED9/DYNC1H1/DYNC1I2/DYNC1LI1	4
HIV PPIs	REACTOME_DISEASES_OF_PROGRAMMED_CELL_DEATH	REACTOME_DISEASES_OF_PROGRAMMED_CELL_DEATH	4/187	103/13356	0.0565786	0.219518	0.172868	APP/YWHAE/CDKN2A/RBBP7	4
HIV PPIs	PID_LIS1_PATHWAY	PID_LIS1_PATHWAY	2/187	28/13356	0.0581086	0.224371	0.17669	YWHAE/DYNC1H1	2
HIV PPIs	REACTOME_PEROXISOMAL_PROTEIN_IMPORT	REACTOME_PEROXISOMAL_PROTEIN_IMPORT	3/187	63/13356	0.0582365	0.224371	0.17669	TYSND1/ACOT8/AGPS	3
HIV PPIs	REACTOME_RHOA_GTPASE_CYCLE	REACTOME_RHOA_GTPASE_CYCLE	5/187	149/13356	0.0583928	0.224371	0.17669	LMAN1/FLOT1/ARHGEF12/ABCD3/ACBD5	5
HIV PPIs	REACTOME_ESTROGEN_DEPENDENT_GENE_EXPRESSION	REACTOME_ESTROGEN_DEPENDENT_GENE_EXPRESSION	5/187	150/13356	0.0597529	0.228861	0.180226	PRMT1/FKBP4/CCNT1/CDK9/CBFB	5
HIV PPIs	WP_G1_TO_S_CELL_CYCLE_CONTROL	WP_G1_TO_S_CELL_CYCLE_CONTROL	3/187	64/13356	0.0604953	0.230964	0.181883	MCM6/CDKN2A/POLE	3
HIV PPIs	REACTOME_ANTIGEN_PRESENTATION_FOLDING_ASSEMBLY_AND_PEPTIDE_LOADING_OF_CLASS_I_MHC	REACTOME_ANTIGEN_PRESENTATION_FOLDING_ASSEMBLY_AND_PEPTIDE_LOADING_OF_CLASS_I_MHC	2/187	29/13356	0.0618535	0.230984	0.181898	CALR/PDIA3	2
HIV PPIs	REACTOME_DOWNREGULATION_OF_ERBB2_SIGNALING	REACTOME_DOWNREGULATION_OF_ERBB2_SIGNALING	2/187	29/13356	0.0618535	0.230984	0.181898	STUB1/CUL5	2
HIV PPIs	REACTOME_MITOPHAGY	REACTOME_MITOPHAGY	2/187	29/13356	0.0618535	0.230984	0.181898	TOMM40/SQSTM1	2
HIV PPIs	REACTOME_NEGATIVE_REGULATION_OF_FGFR3_SIGNALING	REACTOME_NEGATIVE_REGULATION_OF_FGFR3_SIGNALING	2/187	29/13356	0.0618535	0.230984	0.181898	PPP2CB/GRB2	2
HIV PPIs	REACTOME_PEROXISOMAL_LIPID_METABOLISM	REACTOME_PEROXISOMAL_LIPID_METABOLISM	2/187	29/13356	0.0618535	0.230984	0.181898	ACOT8/ACBD5	2
HIV PPIs	WP_ONECARBON_METABOLISM	WP_ONECARBON_METABOLISM	2/187	29/13356	0.0618535	0.230984	0.181898	AHCY/AHCYL2	2
HIV PPIs	WP_PDGFRBETA_PATHWAY	WP_PDGFRBETA_PATHWAY	2/187	29/13356	0.0618535	0.230984	0.181898	EIF2AK2/GRB2	2
HIV PPIs	REACTOME_FOXO_MEDIATED_TRANSCRIPTION	REACTOME_FOXO_MEDIATED_TRANSCRIPTION	3/187	66/13356	0.0651341	0.242478	0.190949	YWHAZ/YWHAB/YWHAG	3
HIV PPIs	REACTOME_REGULATION_OF_TP53_ACTIVITY_THROUGH_ACETYLATION	REACTOME_REGULATION_OF_TP53_ACTIVITY_THROUGH_ACETYLATION	2/187	30/13356	0.0656784	0.24299	0.191353	RBBP7/PIP4P1	2
HIV PPIs	WP_SPHINGOLIPID_PATHWAY	WP_SPHINGOLIPID_PATHWAY	2/187	30/13356	0.0656784	0.24299	0.191353	SGPL1/CERS2	2
HIV PPIs	WP_NONALCOHOLIC_FATTY_LIVER_DISEASE	WP_NONALCOHOLIC_FATTY_LIVER_DISEASE	5/187	155/13356	0.0668231	0.246462	0.194087	COX4I1/COX6B1/NDUFB10/COX5A/NDUFS8	5
HIV PPIs	WP_TRANSSULFURATION_ONECARBON_METABOLISM_AND_RELATED_PATHWAYS	WP_TRANSSULFURATION_ONECARBON_METABOLISM_AND_RELATED_PATHWAYS	3/187	67/13356	0.0675134	0.248241	0.195488	AHCY/AHCYL1/AHCYL2	3
HIV PPIs	WP_MYOMETRIAL_RELAXATION_AND_CONTRACTION_PATHWAYS	WP_MYOMETRIAL_RELAXATION_AND_CONTRACTION_PATHWAYS	5/187	156/13356	0.0682909	0.25033	0.197133	YWHAE/YWHAZ/YWHAB/YWHAG/ARRB2	5
HIV PPIs	PID_NEPHRIN_NEPH1_PATHWAY	PID_NEPHRIN_NEPH1_PATHWAY	2/187	31/13356	0.0695803	0.250957	0.197626	ARRB2/GRB2	2
HIV PPIs	REACTOME_DISASSEMBLY_OF_THE_DESTRUCTION_COMPLEX_AND_RECRUITMENT_OF_AXIN_TO_THE_MEMBRANE	REACTOME_DISASSEMBLY_OF_THE_DESTRUCTION_COMPLEX_AND_RECRUITMENT_OF_AXIN_TO_THE_MEMBRANE	2/187	31/13356	0.0695803	0.250957	0.197626	PPP2CB/PPP2R5E	2
HIV PPIs	REACTOME_HSF1_ACTIVATION	REACTOME_HSF1_ACTIVATION	2/187	31/13356	0.0695803	0.250957	0.197626	YWHAE/FKBP4	2
HIV PPIs	REACTOME_NEGATIVE_REGULATION_OF_FGFR4_SIGNALING	REACTOME_NEGATIVE_REGULATION_OF_FGFR4_SIGNALING	2/187	31/13356	0.0695803	0.250957	0.197626	PPP2CB/GRB2	2
HIV PPIs	WP_ETHANOL_EFFECTS_ON_HISTONE_MODIFICATIONS	WP_ETHANOL_EFFECTS_ON_HISTONE_MODIFICATIONS	2/187	31/13356	0.0695803	0.250957	0.197626	AHCY/HAT1	2
HIV PPIs	PID_P75_NTR_PATHWAY	PID_P75_NTR_PATHWAY	3/187	68/13356	0.0699318	0.250957	0.197626	APP/YWHAE/SQSTM1	3
HIV PPIs	REACTOME_HDR_THROUGH_HOMOLOGOUS_RECOMBINATION_HRR	REACTOME_HDR_THROUGH_HOMOLOGOUS_RECOMBINATION_HRR	3/187	68/13356	0.0699318	0.250957	0.197626	POLE/POLE3/POLE4	3
HIV PPIs	WP_INITIATION_OF_TRANSCRIPTION_AND_TRANSLATION_ELONGATION_AT_THE_HIV1_LTR	WP_INITIATION_OF_TRANSCRIPTION_AND_TRANSLATION_ELONGATION_AT_THE_HIV1_LTR	2/187	32/13356	0.0735562	0.263173	0.207246	CCNT1/CDK9	2
HIV PPIs	REACTOME_CIRCADIAN_CLOCK	REACTOME_CIRCADIAN_CLOCK	3/187	70/13356	0.0748847	0.267126	0.210359	BTRC/SKP1/CUL1	3
HIV PPIs	REACTOME_HCMV_INFECTION	REACTOME_HCMV_INFECTION	5/187	162/13356	0.0774715	0.273558	0.215425	DYNC1H1/RBBP7/DYNC1I2/DYNC1LI1/RANBP2	5
HIV PPIs	KEGG_PROPANOATE_METABOLISM	KEGG_PROPANOATE_METABOLISM	2/187	33/13356	0.0776034	0.273558	0.215425	SUCLA2/HADHA	2
HIV PPIs	REACTOME_CARGO_CONCENTRATION_IN_THE_ER	REACTOME_CARGO_CONCENTRATION_IN_THE_ER	2/187	33/13356	0.0776034	0.273558	0.215425	LMAN1/LMAN2	2
HIV PPIs	REACTOME_NEGATIVE_REGULATION_OF_FGFR1_SIGNALING	REACTOME_NEGATIVE_REGULATION_OF_FGFR1_SIGNALING	2/187	33/13356	0.0776034	0.273558	0.215425	PPP2CB/GRB2	2
HIV PPIs	REACTOME_TRANS_GOLGI_NETWORK_VESICLE_BUDDING	REACTOME_TRANS_GOLGI_NETWORK_VESICLE_BUDDING	3/187	72/13356	0.0799888	0.281137	0.221393	APP/TXNDC5/GAK	3
HIV PPIs	PID_IL2_PI3K_PATHWAY	PID_IL2_PI3K_PATHWAY	2/187	34/13356	0.0817192	0.283056	0.222904	EIF3A/GRB2	2
HIV PPIs	REACTOME_NEGATIVE_REGULATION_OF_FGFR2_SIGNALING	REACTOME_NEGATIVE_REGULATION_OF_FGFR2_SIGNALING	2/187	34/13356	0.0817192	0.283056	0.222904	PPP2CB/GRB2	2
HIV PPIs	REACTOME_SIGNALING_BY_WNT_IN_CANCER	REACTOME_SIGNALING_BY_WNT_IN_CANCER	2/187	34/13356	0.0817192	0.283056	0.222904	PPP2CB/PPP2R5E	2
HIV PPIs	REACTOME_SIGNALLING_TO_ERKS	REACTOME_SIGNALLING_TO_ERKS	2/187	34/13356	0.0817192	0.283056	0.222904	YWHAB/GRB2	2
HIV PPIs	WP_COHESIN_COMPLEX_CORNELIA_DE_LANGE_SYNDROME	WP_COHESIN_COMPLEX_CORNELIA_DE_LANGE_SYNDROME	2/187	34/13356	0.0817192	0.283056	0.222904	PPP2CB/PPP2R5E	2
HIV PPIs	REACTOME_COSTIMULATION_BY_THE_CD28_FAMILY	REACTOME_COSTIMULATION_BY_THE_CD28_FAMILY	3/187	74/13356	0.0852402	0.29355	0.231169	PPP2CB/GRB2/PPP2R5E	3
HIV PPIs	REACTOME_SIGNALING_BY_NOTCH1	REACTOME_SIGNALING_BY_NOTCH1	3/187	74/13356	0.0852402	0.29355	0.231169	ARRB2/SKP1/CUL1	3
HIV PPIs	REACTOME_LYSOSOME_VESICLE_BIOGENESIS	REACTOME_LYSOSOME_VESICLE_BIOGENESIS	2/187	35/13356	0.0859007	0.294975	0.232291	APP/TXNDC5	2
HIV PPIs	WP_FRAGILE_X_SYNDROME	WP_FRAGILE_X_SYNDROME	4/187	120/13356	0.0879823	0.301257	0.237238	APP/CDKN2A/GRB2/ABCD3	4
HIV PPIs	PID_GMCSF_PATHWAY	PID_GMCSF_PATHWAY	2/187	36/13356	0.0901455	0.305956	0.240938	YWHAZ/GRB2	2
HIV PPIs	REACTOME_SMAD2_SMAD3_SMAD4_HETEROTRIMER_REGULATES_TRANSCRIPTION	REACTOME_SMAD2_SMAD3_SMAD4_HETEROTRIMER_REGULATES_TRANSCRIPTION	2/187	36/13356	0.0901455	0.305956	0.240938	CCNT1/CDK9	2
HIV PPIs	SIG_PIP3_SIGNALING_IN_B_LYMPHOCYTES	SIG_PIP3_SIGNALING_IN_B_LYMPHOCYTES	2/187	36/13356	0.0901455	0.305956	0.240938	FLOT1/CDKN2A	2
HIV PPIs	REACTOME_CELL_DEATH_SIGNALLING_VIA_NRAGE_NRIF_AND_NADE	REACTOME_CELL_DEATH_SIGNALLING_VIA_NRAGE_NRIF_AND_NADE	3/187	76/13356	0.0906347	0.305956	0.240938	YWHAE/ARHGEF12/SQSTM1	3
HIV PPIs	WP_PROLACTIN_SIGNALING_PATHWAY	WP_PROLACTIN_SIGNALING_PATHWAY	3/187	76/13356	0.0906347	0.305956	0.240938	YWHAZ/YWHAG/GRB2	3
HIV PPIs	REACTOME_SUMOYLATION_OF_DNA_DAMAGE_RESPONSE_AND_REPAIR_PROTEINS	REACTOME_SUMOYLATION_OF_DNA_DAMAGE_RESPONSE_AND_REPAIR_PROTEINS	3/187	77/13356	0.0933844	0.31435	0.247548	CDKN2A/HERC2/RANBP2	3
HIV PPIs	REACTOME_MITOCHONDRIAL_FATTY_ACID_BETA_OXIDATION	REACTOME_MITOCHONDRIAL_FATTY_ACID_BETA_OXIDATION	2/187	37/13356	0.0944509	0.316159	0.248973	HADHA/HADHB	2
HIV PPIs	REACTOME_REGULATION_OF_TP53_EXPRESSION_AND_DEGRADATION	REACTOME_REGULATION_OF_TP53_EXPRESSION_AND_DEGRADATION	2/187	37/13356	0.0944509	0.316159	0.248973	CDKN2A/PPP2CB	2
HIV PPIs	REACTOME_DNA_REPAIR	REACTOME_DNA_REPAIR	8/187	333/13356	0.0964245	0.321864	0.253465	RUVBL1/POLE/HERC2/POLE3/MSH2/POLE4/MPG/DDB1	8
HIV PPIs	REACTOME_DNA_DAMAGE_RECOGNITION_IN_GG_NER	REACTOME_DNA_DAMAGE_RECOGNITION_IN_GG_NER	2/187	38/13356	0.0988145	0.328578	0.258752	RUVBL1/DDB1	2
HIV PPIs	KEGG_CARDIAC_MUSCLE_CONTRACTION	KEGG_CARDIAC_MUSCLE_CONTRACTION	3/187	79/13356	0.0989858	0.328578	0.258752	COX4I1/COX6B1/COX5A	3
HIV PPIs	WP_MRNA_PROCESSING	WP_MRNA_PROCESSING	4/187	126/13356	0.100718	0.333403	0.262552	RBM17/PRMT1/SNU13/SF3A3	4
HIV PPIs	REACTOME_MAP2K_AND_MAPK_ACTIVATION	REACTOME_MAP2K_AND_MAPK_ACTIVATION	2/187	40/13356	0.107706	0.353596	0.278454	YWHAB/ARRB2	2
HIV PPIs	REACTOME_SIGNALING_BY_FGFR3	REACTOME_SIGNALING_BY_FGFR3	2/187	40/13356	0.107706	0.353596	0.278454	PPP2CB/GRB2	2
HIV PPIs	WP_GLYCOGEN_SYNTHESIS_AND_DEGRADATION	WP_GLYCOGEN_SYNTHESIS_AND_DEGRADATION	2/187	40/13356	0.107706	0.353596	0.278454	PPP2CB/PPP2R5E	2
HIV PPIs	REACTOME_NS1_MEDIATED_EFFECTS_ON_HOST_PATHWAYS	REACTOME_NS1_MEDIATED_EFFECTS_ON_HOST_PATHWAYS	2/187	41/13356	0.11223	0.366433	0.288563	EIF2AK2/RANBP2	2
HIV PPIs	REACTOME_SIGNALING_BY_FGFR4	REACTOME_SIGNALING_BY_FGFR4	2/187	41/13356	0.11223	0.366433	0.288563	PPP2CB/GRB2	2
HIV PPIs	KEGG_HUNTINGTONS_DISEASE	KEGG_HUNTINGTONS_DISEASE	5/187	182/13356	0.112562	0.366516	0.288629	COX4I1/COX6B1/NDUFB10/COX5A/NDUFS8	5
HIV PPIs	WP_PYRIMIDINE_METABOLISM	WP_PYRIMIDINE_METABOLISM	3/187	84/13356	0.113559	0.368759	0.290395	POLE/POLE3/POLE4	3
HIV PPIs	REACTOME_DEACTIVATION_OF_THE_BETA_CATENIN_TRANSACTIVATING_COMPLEX	REACTOME_DEACTIVATION_OF_THE_BETA_CATENIN_TRANSACTIVATING_COMPLEX	2/187	42/13356	0.116802	0.376221	0.296271	YWHAZ/BTRC	2
HIV PPIs	WP_2Q112_COPY_NUMBER_VARIATION_SYNDROME	WP_2Q112_COPY_NUMBER_VARIATION_SYNDROME	2/187	42/13356	0.116802	0.376221	0.296271	CIAO2B/CIAO1	2
HIV PPIs	WP_DNA_REPLICATION	WP_DNA_REPLICATION	2/187	42/13356	0.116802	0.376221	0.296271	MCM6/POLE	2
HIV PPIs	REACTOME_GOLGI_TO_ER_RETROGRADE_TRANSPORT	REACTOME_GOLGI_TO_ER_RETROGRADE_TRANSPORT	4/187	134/13356	0.118939	0.382074	0.30088	TMED9/DYNC1H1/DYNC1I2/DYNC1LI1	4
HIV PPIs	KEGG_TGF_BETA_SIGNALING_PATHWAY	KEGG_TGF_BETA_SIGNALING_PATHWAY	3/187	86/13356	0.119605	0.38216	0.300948	PPP2CB/SKP1/CUL1	3
HIV PPIs	REACTOME_PLATELET_HOMEOSTASIS	REACTOME_PLATELET_HOMEOSTASIS	3/187	86/13356	0.119605	0.38216	0.300948	PPP2CB/ATP2B1/PPP2R5E	3
HIV PPIs	REACTOME_ORGANELLE_BIOGENESIS_AND_MAINTENANCE	REACTOME_ORGANELLE_BIOGENESIS_AND_MAINTENANCE	7/187	296/13356	0.122444	0.390189	0.30727	YWHAE/YWHAG/SDCCAG8/SSBP1/DYNC1H1/DYNC1I2/TMEM11	7
HIV PPIs	KEGG_ANTIGEN_PROCESSING_AND_PRESENTATION	KEGG_ANTIGEN_PROCESSING_AND_PRESENTATION	3/187	88/13356	0.125767	0.394991	0.311052	CALR/PDIA3/PSME3	3
HIV PPIs	KEGG_ABC_TRANSPORTERS	KEGG_ABC_TRANSPORTERS	2/187	44/13356	0.126083	0.394991	0.311052	ABCD3/ABCB10	2
HIV PPIs	KEGG_VALINE_LEUCINE_AND_ISOLEUCINE_DEGRADATION	KEGG_VALINE_LEUCINE_AND_ISOLEUCINE_DEGRADATION	2/187	44/13356	0.126083	0.394991	0.311052	HADHA/HADHB	2
HIV PPIs	REACTOME_HOMOLOGY_DIRECTED_REPAIR	REACTOME_HOMOLOGY_DIRECTED_REPAIR	4/187	138/13356	0.128549	0.394991	0.311052	POLE/HERC2/POLE3/POLE4	4
HIV PPIs	PID_ILK_PATHWAY	PID_ILK_PATHWAY	2/187	45/13356	0.130788	0.394991	0.311052	PPP1R12A/RUVBL1	2
HIV PPIs	REACTOME_SIGNALING_BY_MODERATE_KINASE_ACTIVITY_BRAF_MUTANTS	REACTOME_SIGNALING_BY_MODERATE_KINASE_ACTIVITY_BRAF_MUTANTS	2/187	45/13356	0.130788	0.394991	0.311052	YWHAB/ARRB2	2
HIV PPIs	REACTOME_SPHINGOLIPID_DE_NOVO_BIOSYNTHESIS	REACTOME_SPHINGOLIPID_DE_NOVO_BIOSYNTHESIS	2/187	45/13356	0.130788	0.394991	0.311052	SGPL1/CERS2	2
HIV PPIs	BIOCARTA_EIF2_PATHWAY	BIOCARTA_EIF2_PATHWAY	1/187	10/13356	0.131553	0.394991	0.311052	EIF2AK2	1
HIV PPIs	BIOCARTA_RNA_PATHWAY	BIOCARTA_RNA_PATHWAY	1/187	10/13356	0.131553	0.394991	0.311052	EIF2AK2	1
HIV PPIs	KEGG_LIMONENE_AND_PINENE_DEGRADATION	KEGG_LIMONENE_AND_PINENE_DEGRADATION	1/187	10/13356	0.131553	0.394991	0.311052	HADHA	1
HIV PPIs	REACTOME_ATF6_ATF6_ALPHA_ACTIVATES_CHAPERONE_GENES	REACTOME_ATF6_ATF6_ALPHA_ACTIVATES_CHAPERONE_GENES	1/187	10/13356	0.131553	0.394991	0.311052	CALR	1
HIV PPIs	REACTOME_BICARBONATE_TRANSPORTERS	REACTOME_BICARBONATE_TRANSPORTERS	1/187	10/13356	0.131553	0.394991	0.311052	AHCYL2	1
HIV PPIs	REACTOME_CHYLOMICRON_ASSEMBLY	REACTOME_CHYLOMICRON_ASSEMBLY	1/187	10/13356	0.131553	0.394991	0.311052	P4HB	1
HIV PPIs	REACTOME_MASTL_FACILITATES_MITOTIC_PROGRESSION	REACTOME_MASTL_FACILITATES_MITOTIC_PROGRESSION	1/187	10/13356	0.131553	0.394991	0.311052	PPP2CB	1
HIV PPIs	REACTOME_MET_RECEPTOR_RECYCLING	REACTOME_MET_RECEPTOR_RECYCLING	1/187	10/13356	0.131553	0.394991	0.311052	GRB2	1
HIV PPIs	REACTOME_REACTIONS_SPECIFIC_TO_THE_COMPLEX_N_GLYCAN_SYNTHESIS_PATHWAY	REACTOME_REACTIONS_SPECIFIC_TO_THE_COMPLEX_N_GLYCAN_SYNTHESIS_PATHWAY	1/187	10/13356	0.131553	0.394991	0.311052	FUT8	1
HIV PPIs	REACTOME_RUNX1_AND_FOXP3_CONTROL_THE_DEVELOPMENT_OF_REGULATORY_T_LYMPHOCYTES_TREGS	REACTOME_RUNX1_AND_FOXP3_CONTROL_THE_DEVELOPMENT_OF_REGULATORY_T_LYMPHOCYTES_TREGS	1/187	10/13356	0.131553	0.394991	0.311052	CBFB	1
HIV PPIs	REACTOME_SIGNAL_ATTENUATION	REACTOME_SIGNAL_ATTENUATION	1/187	10/13356	0.131553	0.394991	0.311052	GRB2	1
HIV PPIs	REACTOME_STAT5_ACTIVATION_DOWNSTREAM_OF_FLT3_ITD_MUTANTS	REACTOME_STAT5_ACTIVATION_DOWNSTREAM_OF_FLT3_ITD_MUTANTS	1/187	10/13356	0.131553	0.394991	0.311052	GRB2	1
HIV PPIs	WP_BIOSYNTHESIS_AND_REGENERATION_OF_TETRAHYDROBIOPTERIN_AND_CATABOLISM_OF_PHENYLALANINE	WP_BIOSYNTHESIS_AND_REGENERATION_OF_TETRAHYDROBIOPTERIN_AND_CATABOLISM_OF_PHENYLALANINE	1/187	10/13356	0.131553	0.394991	0.311052	COMT	1
HIV PPIs	WP_INTERLEUKIN1_INDUCED_ACTIVATION_OF_NFKB	WP_INTERLEUKIN1_INDUCED_ACTIVATION_OF_NFKB	1/187	10/13356	0.131553	0.394991	0.311052	SQSTM1	1
HIV PPIs	WP_MICRORNA_NETWORK_ASSOCIATED_WITH_CHRONIC_LYMPHOCYTIC_LEUKEMIA	WP_MICRORNA_NETWORK_ASSOCIATED_WITH_CHRONIC_LYMPHOCYTIC_LEUKEMIA	1/187	10/13356	0.131553	0.394991	0.311052	MCL1	1
HIV PPIs	WP_TRANSSULFURATION_PATHWAY	WP_TRANSSULFURATION_PATHWAY	1/187	10/13356	0.131553	0.394991	0.311052	AHCY	1
HIV PPIs	WP_RETINOBLASTOMA_GENE_IN_CANCER	WP_RETINOBLASTOMA_GENE_IN_CANCER	3/187	90/13356	0.132042	0.395465	0.311425	MCM6/POLE/RBBP7	3
HIV PPIs	WP_ANDROGEN_RECEPTOR_SIGNALING_PATHWAY	WP_ANDROGEN_RECEPTOR_SIGNALING_PATHWAY	3/187	91/13356	0.13522	0.400165	0.315126	CALR/FKBP4/STUB1	3
HIV PPIs	PID_PLK1_PATHWAY	PID_PLK1_PATHWAY	2/187	46/13356	0.135533	0.400165	0.315126	PPP1R12A/FBXW11	2
HIV PPIs	SIG_BCR_SIGNALING_PATHWAY	SIG_BCR_SIGNALING_PATHWAY	2/187	46/13356	0.135533	0.400165	0.315126	FLOT1/GRB2	2
HIV PPIs	WP_ENDOPLASMIC_RETICULUM_STRESS_RESPONSE_IN_CORONAVIRUS_INFECTION	WP_ENDOPLASMIC_RETICULUM_STRESS_RESPONSE_IN_CORONAVIRUS_INFECTION	2/187	46/13356	0.135533	0.400165	0.315126	EIF2AK2/PPP1R12A	2
HIV PPIs	WP_ENVELOPE_PROTEINS_AND_THEIR_POTENTIAL_ROLES_IN_EDMD_PHYSIOPATHOLOGY	WP_ENVELOPE_PROTEINS_AND_THEIR_POTENTIAL_ROLES_IN_EDMD_PHYSIOPATHOLOGY	2/187	46/13356	0.135533	0.400165	0.315126	SUN1/GRB2	2
HIV PPIs	REACTOME_NEUTROPHIL_DEGRANULATION	REACTOME_NEUTROPHIL_DEGRANULATION	10/187	479/13356	0.135621	0.400165	0.315126	PSMD11/PSMD7/PRDX4/TXNDC5/DSP/SDCBP/HUWE1/DYNC1H1/DYNC1LI1/ATAD3B	10
HIV PPIs	PID_IL6_7_PATHWAY	PID_IL6_7_PATHWAY	2/187	47/13356	0.140316	0.400344	0.315268	MCL1/GRB2	2
HIV PPIs	BIOCARTA_BTG2_PATHWAY	BIOCARTA_BTG2_PATHWAY	1/187	11/13356	0.143722	0.400344	0.315268	PRMT1	1
HIV PPIs	BIOCARTA_IL4_PATHWAY	BIOCARTA_IL4_PATHWAY	1/187	11/13356	0.143722	0.400344	0.315268	GRB2	1
HIV PPIs	BIOCARTA_NPC_PATHWAY	BIOCARTA_NPC_PATHWAY	1/187	11/13356	0.143722	0.400344	0.315268	RANBP2	1
HIV PPIs	BIOCARTA_RANBP2_PATHWAY	BIOCARTA_RANBP2_PATHWAY	1/187	11/13356	0.143722	0.400344	0.315268	RANBP2	1
HIV PPIs	BIOCARTA_SRCRPTP_PATHWAY	BIOCARTA_SRCRPTP_PATHWAY	1/187	11/13356	0.143722	0.400344	0.315268	GRB2	1
HIV PPIs	BIOCARTA_VITCB_PATHWAY	BIOCARTA_VITCB_PATHWAY	1/187	11/13356	0.143722	0.400344	0.315268	P4HB	1
HIV PPIs	PID_RANBP2_PATHWAY	PID_RANBP2_PATHWAY	1/187	11/13356	0.143722	0.400344	0.315268	RANBP2	1
HIV PPIs	REACTOME_ACTIVATED_NTRK2_SIGNALS_THROUGH_FRS2_AND_FRS3	REACTOME_ACTIVATED_NTRK2_SIGNALS_THROUGH_FRS2_AND_FRS3	1/187	11/13356	0.143722	0.400344	0.315268	GRB2	1
HIV PPIs	REACTOME_APOPTOTIC_CLEAVAGE_OF_CELL_ADHESION_PROTEINS	REACTOME_APOPTOTIC_CLEAVAGE_OF_CELL_ADHESION_PROTEINS	1/187	11/13356	0.143722	0.400344	0.315268	DSP	1
HIV PPIs	REACTOME_BETA_OXIDATION_OF_VERY_LONG_CHAIN_FATTY_ACIDS	REACTOME_BETA_OXIDATION_OF_VERY_LONG_CHAIN_FATTY_ACIDS	1/187	11/13356	0.143722	0.400344	0.315268	ACOT8	1
HIV PPIs	REACTOME_CLEC7A_DECTIN_1_INDUCES_NFAT_ACTIVATION	REACTOME_CLEC7A_DECTIN_1_INDUCES_NFAT_ACTIVATION	1/187	11/13356	0.143722	0.400344	0.315268	AHCYL1	1
HIV PPIs	REACTOME_CONSTITUTIVE_SIGNALING_BY_OVEREXPRESSED_ERBB2	REACTOME_CONSTITUTIVE_SIGNALING_BY_OVEREXPRESSED_ERBB2	1/187	11/13356	0.143722	0.400344	0.315268	GRB2	1
HIV PPIs	REACTOME_FREE_FATTY_ACIDS_REGULATE_INSULIN_SECRETION	REACTOME_FREE_FATTY_ACIDS_REGULATE_INSULIN_SECRETION	1/187	11/13356	0.143722	0.400344	0.315268	ACSL3	1
HIV PPIs	REACTOME_MATURATION_OF_SARSCOV1_NUCLEOPROTEIN	REACTOME_MATURATION_OF_SARSCOV1_NUCLEOPROTEIN	1/187	11/13356	0.143722	0.400344	0.315268	PARP4	1
HIV PPIs	REACTOME_MET_ACTIVATES_RAP1_AND_RAC1	REACTOME_MET_ACTIVATES_RAP1_AND_RAC1	1/187	11/13356	0.143722	0.400344	0.315268	GRB2	1
HIV PPIs	REACTOME_MET_ACTIVATES_RAS_SIGNALING	REACTOME_MET_ACTIVATES_RAS_SIGNALING	1/187	11/13356	0.143722	0.400344	0.315268	GRB2	1
HIV PPIs	REACTOME_NEUROTRANSMITTER_CLEARANCE	REACTOME_NEUROTRANSMITTER_CLEARANCE	1/187	11/13356	0.143722	0.400344	0.315268	COMT	1
HIV PPIs	REACTOME_NOTCH4_ACTIVATION_AND_TRANSMISSION_OF_SIGNAL_TO_THE_NUCLEUS	REACTOME_NOTCH4_ACTIVATION_AND_TRANSMISSION_OF_SIGNAL_TO_THE_NUCLEUS	1/187	11/13356	0.143722	0.400344	0.315268	YWHAZ	1
HIV PPIs	REACTOME_PEXOPHAGY	REACTOME_PEXOPHAGY	1/187	11/13356	0.143722	0.400344	0.315268	SQSTM1	1
HIV PPIs	REACTOME_SIGNALING_BY_FGFR4_IN_DISEASE	REACTOME_SIGNALING_BY_FGFR4_IN_DISEASE	1/187	11/13356	0.143722	0.400344	0.315268	GRB2	1
HIV PPIs	WP_INCLUSION_BODY_MYOSITIS	WP_INCLUSION_BODY_MYOSITIS	1/187	11/13356	0.143722	0.400344	0.315268	APP	1
HIV PPIs	WP_METHIONINE_METABOLISM_LEADING_TO_SULFUR_AMINO_ACIDS_AND_RELATED_DISORDERS	WP_METHIONINE_METABOLISM_LEADING_TO_SULFUR_AMINO_ACIDS_AND_RELATED_DISORDERS	1/187	11/13356	0.143722	0.400344	0.315268	AHCY	1
HIV PPIs	WP_SEROTONIN_TRANSPORTER_ACTIVITY	WP_SEROTONIN_TRANSPORTER_ACTIVITY	1/187	11/13356	0.143722	0.400344	0.315268	PPP2CB	1
HIV PPIs	REACTOME_INTERLEUKIN_3_INTERLEUKIN_5_AND_GM_CSF_SIGNALING	REACTOME_INTERLEUKIN_3_INTERLEUKIN_5_AND_GM_CSF_SIGNALING	2/187	48/13356	0.145135	0.401474	0.316157	YWHAZ/GRB2	2
HIV PPIs	REACTOME_NOTCH1_INTRACELLULAR_DOMAIN_REGULATES_TRANSCRIPTION	REACTOME_NOTCH1_INTRACELLULAR_DOMAIN_REGULATES_TRANSCRIPTION	2/187	48/13356	0.145135	0.401474	0.316157	SKP1/CUL1	2
HIV PPIs	WP_EXERCISEINDUCED_CIRCADIAN_REGULATION	WP_EXERCISEINDUCED_CIRCADIAN_REGULATION	2/187	48/13356	0.145135	0.401474	0.316157	PPP2CB/SF3A3	2
HIV PPIs	REACTOME_CLATHRIN_MEDIATED_ENDOCYTOSIS	REACTOME_CLATHRIN_MEDIATED_ENDOCYTOSIS	4/187	145/13356	0.146114	0.402319	0.316823	GAK/ARRB2/GRB2/NEDD8	4
HIV PPIs	WP_MALE_INFERTILITY	WP_MALE_INFERTILITY	4/187	145/13356	0.146114	0.402319	0.316823	PON2/PUM2/CCNT1/CDK9	4
HIV PPIs	WP_IL3_SIGNALING_PATHWAY	WP_IL3_SIGNALING_PATHWAY	2/187	49/13356	0.149988	0.412037	0.324476	YWHAB/GRB2	2
HIV PPIs	REACTOME_MITOCHONDRIAL_TRANSLATION	REACTOME_MITOCHONDRIAL_TRANSLATION	3/187	96/13356	0.151494	0.415219	0.326981	MRPL11/MRPL42/CHCHD1	3
HIV PPIs	REACTOME_CILIUM_ASSEMBLY	REACTOME_CILIUM_ASSEMBLY	5/187	202/13356	0.154008	0.415371	0.327101	YWHAE/YWHAG/SDCCAG8/DYNC1H1/DYNC1I2	5
HIV PPIs	REACTOME_P75_NTR_RECEPTOR_MEDIATED_SIGNALLING	REACTOME_P75_NTR_RECEPTOR_MEDIATED_SIGNALLING	3/187	97/13356	0.154821	0.415371	0.327101	YWHAE/ARHGEF12/SQSTM1	3
HIV PPIs	REACTOME_SIGNALING_BY_FGFR1	REACTOME_SIGNALING_BY_FGFR1	2/187	50/13356	0.154874	0.415371	0.327101	PPP2CB/GRB2	2
HIV PPIs	BIOCARTA_CBL_PATHWAY	BIOCARTA_CBL_PATHWAY	1/187	12/13356	0.155721	0.415371	0.327101	GRB2	1
HIV PPIs	BIOCARTA_CELL2CELL_PATHWAY	BIOCARTA_CELL2CELL_PATHWAY	1/187	12/13356	0.155721	0.415371	0.327101	CTNNA3	1
HIV PPIs	REACTOME_ATF6_ATF6_ALPHA_ACTIVATES_CHAPERONES	REACTOME_ATF6_ATF6_ALPHA_ACTIVATES_CHAPERONES	1/187	12/13356	0.155721	0.415371	0.327101	CALR	1
HIV PPIs	REACTOME_CD28_DEPENDENT_VAV1_PATHWAY	REACTOME_CD28_DEPENDENT_VAV1_PATHWAY	1/187	12/13356	0.155721	0.415371	0.327101	GRB2	1
HIV PPIs	REACTOME_GP1B_IX_V_ACTIVATION_SIGNALLING	REACTOME_GP1B_IX_V_ACTIVATION_SIGNALLING	1/187	12/13356	0.155721	0.415371	0.327101	YWHAZ	1
HIV PPIs	REACTOME_REDUCTION_OF_CYTOSOLIC_CA_LEVELS	REACTOME_REDUCTION_OF_CYTOSOLIC_CA_LEVELS	1/187	12/13356	0.155721	0.415371	0.327101	ATP2B1	1
HIV PPIs	REACTOME_REGULATION_OF_GLYCOLYSIS_BY_FRUCTOSE_2_6_BISPHOSPHATE_METABOLISM	REACTOME_REGULATION_OF_GLYCOLYSIS_BY_FRUCTOSE_2_6_BISPHOSPHATE_METABOLISM	1/187	12/13356	0.155721	0.415371	0.327101	PPP2CB	1
HIV PPIs	REACTOME_SIGNALING_BY_PDGFRA_TRANSMEMBRANE_JUXTAMEMBRANE_AND_KINASE_DOMAIN_MUTANTS	REACTOME_SIGNALING_BY_PDGFRA_TRANSMEMBRANE_JUXTAMEMBRANE_AND_KINASE_DOMAIN_MUTANTS	1/187	12/13356	0.155721	0.415371	0.327101	GRB2	1
HIV PPIs	REACTOME_UNWINDING_OF_DNA	REACTOME_UNWINDING_OF_DNA	1/187	12/13356	0.155721	0.415371	0.327101	MCM6	1
HIV PPIs	REACTOME_INTRA_GOLGI_AND_RETROGRADE_GOLGI_TO_ER_TRAFFIC	REACTOME_INTRA_GOLGI_AND_RETROGRADE_GOLGI_TO_ER_TRAFFIC	5/187	203/13356	0.15623	0.415801	0.32744	GOLGA1/TMED9/DYNC1H1/DYNC1I2/DYNC1LI1	5
HIV PPIs	KEGG_PYRIMIDINE_METABOLISM	KEGG_PYRIMIDINE_METABOLISM	3/187	98/13356	0.158172	0.419881	0.330653	POLE/POLE3/POLE4	3
HIV PPIs	REACTOME_SARS_COV_2_HOST_INTERACTIONS	REACTOME_SARS_COV_2_HOST_INTERACTIONS	5/187	204/13356	0.158466	0.419881	0.330653	YWHAE/YWHAZ/YWHAB/YWHAG/RANBP2	5
HIV PPIs	WP_PHOTODYNAMIC_THERAPYINDUCED_AP1_SURVIVAL_SIGNALING	WP_PHOTODYNAMIC_THERAPYINDUCED_AP1_SURVIVAL_SIGNALING	2/187	51/13356	0.15979	0.422453	0.332678	CDKN2A/MCL1	2
HIV PPIs	WP_HEPATITIS_B_INFECTION	WP_HEPATITIS_B_INFECTION	4/187	151/13356	0.161871	0.426886	0.336169	YWHAZ/YWHAB/GRB2/DDB1	4
HIV PPIs	WP_ALZHEIMERS_DISEASE	WP_ALZHEIMERS_DISEASE	6/187	262/13356	0.162181	0.426886	0.336169	EIF2AK2/PSMD7/PSMB6/APP/PSMA1/AMBRA1	6
HIV PPIs	WP_MALIGNANT_PLEURAL_MESOTHELIOMA	WP_MALIGNANT_PLEURAL_MESOTHELIOMA	9/187	439/13356	0.163431	0.429231	0.338016	DSC3/YWHAB/CTNNA3/CDKN2A/LIMD1/MCL1/GRB2/BTRC/CUL1	9
HIV PPIs	KEGG_ENDOMETRIAL_CANCER	KEGG_ENDOMETRIAL_CANCER	2/187	52/13356	0.164734	0.431519	0.339818	CTNNA3/GRB2	2
HIV PPIs	REACTOME_ALPHA_LINOLENIC_OMEGA3_AND_LINOLEIC_OMEGA6_ACID_METABOLISM	REACTOME_ALPHA_LINOLENIC_OMEGA3_AND_LINOLEIC_OMEGA6_ACID_METABOLISM	1/187	13/13356	0.167552	0.431519	0.339818	ACOT8	1
HIV PPIs	REACTOME_ERKS_ARE_INACTIVATED	REACTOME_ERKS_ARE_INACTIVATED	1/187	13/13356	0.167552	0.431519	0.339818	PPP2CB	1
HIV PPIs	REACTOME_ERYTHROCYTES_TAKE_UP_CARBON_DIOXIDE_AND_RELEASE_OXYGEN	REACTOME_ERYTHROCYTES_TAKE_UP_CARBON_DIOXIDE_AND_RELEASE_OXYGEN	1/187	13/13356	0.167552	0.431519	0.339818	CYB5R1	1
HIV PPIs	REACTOME_INHIBITION_OF_REPLICATION_INITIATION_OF_DAMAGED_DNA_BY_RB1_E2F1	REACTOME_INHIBITION_OF_REPLICATION_INITIATION_OF_DAMAGED_DNA_BY_RB1_E2F1	1/187	13/13356	0.167552	0.431519	0.339818	PPP2CB	1
HIV PPIs	REACTOME_NF_KB_IS_ACTIVATED_AND_SIGNALS_SURVIVAL	REACTOME_NF_KB_IS_ACTIVATED_AND_SIGNALS_SURVIVAL	1/187	13/13356	0.167552	0.431519	0.339818	SQSTM1	1
HIV PPIs	REACTOME_P75NTR_RECRUITS_SIGNALLING_COMPLEXES	REACTOME_P75NTR_RECRUITS_SIGNALLING_COMPLEXES	1/187	13/13356	0.167552	0.431519	0.339818	SQSTM1	1
HIV PPIs	SA_REG_CASCADE_OF_CYCLIN_EXPR	SA_REG_CASCADE_OF_CYCLIN_EXPR	1/187	13/13356	0.167552	0.431519	0.339818	CDKN2A	1
HIV PPIs	WP_NITRIC_OXIDE_METABOLISM_IN_CYSTIC_FIBROSIS	WP_NITRIC_OXIDE_METABOLISM_IN_CYSTIC_FIBROSIS	1/187	13/13356	0.167552	0.431519	0.339818	PRMT1	1
HIV PPIs	REACTOME_POTENTIAL_THERAPEUTICS_FOR_SARS	REACTOME_POTENTIAL_THERAPEUTICS_FOR_SARS	4/187	154/13356	0.169974	0.436816	0.343989	FKBP4/GRB2/RBBP7/COMT	4
HIV PPIs	KEGG_PATHWAYS_IN_CANCER	KEGG_PATHWAYS_IN_CANCER	7/187	325/13356	0.171753	0.44044	0.346843	CTNNA3/CDKN2A/MSH2/GRB2/ELOB/ELOC/CUL2	7
HIV PPIs	KEGG_NON_SMALL_CELL_LUNG_CANCER	KEGG_NON_SMALL_CELL_LUNG_CANCER	2/187	54/13356	0.174702	0.443409	0.349181	CDKN2A/GRB2	2
HIV PPIs	REACTOME_ION_HOMEOSTASIS	REACTOME_ION_HOMEOSTASIS	2/187	54/13356	0.174702	0.443409	0.349181	AHCYL1/ATP2B1	2
HIV PPIs	BIOCARTA_ERK5_PATHWAY	BIOCARTA_ERK5_PATHWAY	1/187	14/13356	0.179219	0.443409	0.349181	GRB2	1
HIV PPIs	BIOCARTA_MHC_PATHWAY	BIOCARTA_MHC_PATHWAY	1/187	14/13356	0.179219	0.443409	0.349181	PSMB6	1
HIV PPIs	BIOCARTA_PLATELETAPP_PATHWAY	BIOCARTA_PLATELETAPP_PATHWAY	1/187	14/13356	0.179219	0.443409	0.349181	APP	1
HIV PPIs	BIOCARTA_PRC2_PATHWAY	BIOCARTA_PRC2_PATHWAY	1/187	14/13356	0.179219	0.443409	0.349181	RBBP7	1
HIV PPIs	BIOCARTA_PS1_PATHWAY	BIOCARTA_PS1_PATHWAY	1/187	14/13356	0.179219	0.443409	0.349181	BTRC	1
HIV PPIs	BIOCARTA_RANKL_PATHWAY	BIOCARTA_RANKL_PATHWAY	1/187	14/13356	0.179219	0.443409	0.349181	EIF2AK2	1
HIV PPIs	BIOCARTA_TRKA_PATHWAY	BIOCARTA_TRKA_PATHWAY	1/187	14/13356	0.179219	0.443409	0.349181	GRB2	1
HIV PPIs	REACTOME_ERYTHROPOIETIN_ACTIVATES_RAS	REACTOME_ERYTHROPOIETIN_ACTIVATES_RAS	1/187	14/13356	0.179219	0.443409	0.349181	GRB2	1
HIV PPIs	REACTOME_INTERLEUKIN_15_SIGNALING	REACTOME_INTERLEUKIN_15_SIGNALING	1/187	14/13356	0.179219	0.443409	0.349181	GRB2	1
HIV PPIs	REACTOME_PROLONGED_ERK_ACTIVATION_EVENTS	REACTOME_PROLONGED_ERK_ACTIVATION_EVENTS	1/187	14/13356	0.179219	0.443409	0.349181	YWHAB	1
HIV PPIs	REACTOME_SHC1_EVENTS_IN_EGFR_SIGNALING	REACTOME_SHC1_EVENTS_IN_EGFR_SIGNALING	1/187	14/13356	0.179219	0.443409	0.349181	GRB2	1
HIV PPIs	REACTOME_SHC1_EVENTS_IN_ERBB4_SIGNALING	REACTOME_SHC1_EVENTS_IN_ERBB4_SIGNALING	1/187	14/13356	0.179219	0.443409	0.349181	GRB2	1
HIV PPIs	WP_KENNEDY_PATHWAY_FROM_SPHINGOLIPIDS	WP_KENNEDY_PATHWAY_FROM_SPHINGOLIPIDS	1/187	14/13356	0.179219	0.443409	0.349181	SGPL1	1
HIV PPIs	WP_OMEGA9_FATTY_ACID_SYNTHESIS	WP_OMEGA9_FATTY_ACID_SYNTHESIS	1/187	14/13356	0.179219	0.443409	0.349181	ACSL3	1
HIV PPIs	WP_RIBOFLAVIN_AND_COQ_DISORDERS	WP_RIBOFLAVIN_AND_COQ_DISORDERS	1/187	14/13356	0.179219	0.443409	0.349181	FLAD1	1
HIV PPIs	REACTOME_AMINO_ACIDS_REGULATE_MTORC1	REACTOME_AMINO_ACIDS_REGULATE_MTORC1	2/187	55/13356	0.179722	0.443734	0.349437	FNIP1/FLCN	2
HIV PPIs	REACTOME_CARGO_RECOGNITION_FOR_CLATHRIN_MEDIATED_ENDOCYTOSIS	REACTOME_CARGO_RECOGNITION_FOR_CLATHRIN_MEDIATED_ENDOCYTOSIS	3/187	105/13356	0.182218	0.44897	0.35356	ARRB2/GRB2/NEDD8	3
HIV PPIs	KEGG_HEDGEHOG_SIGNALING_PATHWAY	KEGG_HEDGEHOG_SIGNALING_PATHWAY	2/187	56/13356	0.184763	0.45221	0.356112	FBXW11/BTRC	2
HIV PPIs	REACTOME_GOLGI_ASSOCIATED_VESICLE_BIOGENESIS	REACTOME_GOLGI_ASSOCIATED_VESICLE_BIOGENESIS	2/187	56/13356	0.184763	0.45221	0.356112	TXNDC5/GAK	2
HIV PPIs	REACTOME_REGULATION_OF_TP53_ACTIVITY	REACTOME_REGULATION_OF_TP53_ACTIVITY	4/187	160/13356	0.186594	0.45221	0.356112	CDKN2A/PPP2CB/RBBP7/PIP4P1	4
HIV PPIs	REACTOME_COMPLEX_I_BIOGENESIS	REACTOME_COMPLEX_I_BIOGENESIS	2/187	57/13356	0.189825	0.45221	0.356112	NDUFB10/NDUFS8	2
HIV PPIs	BIOCARTA_HIF_PATHWAY	BIOCARTA_HIF_PATHWAY	1/187	15/13356	0.190723	0.45221	0.356112	P4HB	1
HIV PPIs	BIOCARTA_IL3_PATHWAY	BIOCARTA_IL3_PATHWAY	1/187	15/13356	0.190723	0.45221	0.356112	GRB2	1
HIV PPIs	KEGG_GLYCOSAMINOGLYCAN_BIOSYNTHESIS_KERATAN_SULFATE	KEGG_GLYCOSAMINOGLYCAN_BIOSYNTHESIS_KERATAN_SULFATE	1/187	15/13356	0.190723	0.45221	0.356112	FUT8	1
HIV PPIs	PID_ERB_GENOMIC_PATHWAY	PID_ERB_GENOMIC_PATHWAY	1/187	15/13356	0.190723	0.45221	0.356112	NEDD8	1
HIV PPIs	REACTOME_CONSTITUTIVE_SIGNALING_BY_EGFRVIII	REACTOME_CONSTITUTIVE_SIGNALING_BY_EGFRVIII	1/187	15/13356	0.190723	0.45221	0.356112	GRB2	1
HIV PPIs	REACTOME_GRB2_SOS_PROVIDES_LINKAGE_TO_MAPK_SIGNALING_FOR_INTEGRINS	REACTOME_GRB2_SOS_PROVIDES_LINKAGE_TO_MAPK_SIGNALING_FOR_INTEGRINS	1/187	15/13356	0.190723	0.45221	0.356112	GRB2	1
HIV PPIs	REACTOME_INLB_MEDIATED_ENTRY_OF_LISTERIA_MONOCYTOGENES_INTO_HOST_CELL	REACTOME_INLB_MEDIATED_ENTRY_OF_LISTERIA_MONOCYTOGENES_INTO_HOST_CELL	1/187	15/13356	0.190723	0.45221	0.356112	GRB2	1
HIV PPIs	REACTOME_MISMATCH_REPAIR	REACTOME_MISMATCH_REPAIR	1/187	15/13356	0.190723	0.45221	0.356112	MSH2	1
HIV PPIs	REACTOME_WNT5A_DEPENDENT_INTERNALIZATION_OF_FZD4	REACTOME_WNT5A_DEPENDENT_INTERNALIZATION_OF_FZD4	1/187	15/13356	0.190723	0.45221	0.356112	ARRB2	1
HIV PPIs	SA_G1_AND_S_PHASES	SA_G1_AND_S_PHASES	1/187	15/13356	0.190723	0.45221	0.356112	CDKN2A	1
HIV PPIs	WP_BIOGENIC_AMINE_SYNTHESIS	WP_BIOGENIC_AMINE_SYNTHESIS	1/187	15/13356	0.190723	0.45221	0.356112	COMT	1
HIV PPIs	WP_CYSTEINE_AND_METHIONINE_CATABOLISM	WP_CYSTEINE_AND_METHIONINE_CATABOLISM	1/187	15/13356	0.190723	0.45221	0.356112	AHCY	1
HIV PPIs	WP_OMEGA3_OMEGA6_FATTY_ACID_SYNTHESIS	WP_OMEGA3_OMEGA6_FATTY_ACID_SYNTHESIS	1/187	15/13356	0.190723	0.45221	0.356112	ACSL3	1
HIV PPIs	WP_PROSURVIVAL_SIGNALING_OF_NEUROPROTECTIN_D1	WP_PROSURVIVAL_SIGNALING_OF_NEUROPROTECTIN_D1	1/187	15/13356	0.190723	0.45221	0.356112	PPP2CB	1
HIV PPIs	WP_TRANSCRIPTIONAL_ACTIVATION_BY_NRF2_IN_RESPONSE_TO_PHYTOCHEMICALS	WP_TRANSCRIPTIONAL_ACTIVATION_BY_NRF2_IN_RESPONSE_TO_PHYTOCHEMICALS	1/187	15/13356	0.190723	0.45221	0.356112	AIMP2	1
HIV PPIs	REACTOME_INTEGRATION_OF_ENERGY_METABOLISM	REACTOME_INTEGRATION_OF_ENERGY_METABOLISM	3/187	108/13356	0.192811	0.456255	0.359297	PPP2CB/AHCYL1/ACSL3	3
HIV PPIs	REACTOME_SIGNALING_BY_NOTCH1_PEST_DOMAIN_MUTANTS_IN_CANCER	REACTOME_SIGNALING_BY_NOTCH1_PEST_DOMAIN_MUTANTS_IN_CANCER	2/187	58/13356	0.194906	0.460302	0.362484	SKP1/CUL1	2
HIV PPIs	REACTOME_ESR_MEDIATED_SIGNALING	REACTOME_ESR_MEDIATED_SIGNALING	5/187	221/13356	0.198364	0.462585	0.364282	PRMT1/FKBP4/CCNT1/CDK9/CBFB	5
HIV PPIs	WP_DNA_DAMAGE_RESPONSE_ONLY_ATM_DEPENDENT	WP_DNA_DAMAGE_RESPONSE_ONLY_ATM_DEPENDENT	3/187	110/13356	0.199957	0.462585	0.364282	CDKN2A/GRB2/PPP2R5E	3
HIV PPIs	PID_NOTCH_PATHWAY	PID_NOTCH_PATHWAY	2/187	59/13356	0.200004	0.462585	0.364282	SKP1/CUL1	2
HIV PPIs	BIOCARTA_EIF_PATHWAY	BIOCARTA_EIF_PATHWAY	1/187	16/13356	0.202066	0.462585	0.364282	EIF3A	1
HIV PPIs	KEGG_RIBOFLAVIN_METABOLISM	KEGG_RIBOFLAVIN_METABOLISM	1/187	16/13356	0.202066	0.462585	0.364282	FLAD1	1
HIV PPIs	REACTOME_GRB2_EVENTS_IN_ERBB2_SIGNALING	REACTOME_GRB2_EVENTS_IN_ERBB2_SIGNALING	1/187	16/13356	0.202066	0.462585	0.364282	GRB2	1
HIV PPIs	REACTOME_MRNA_DECAY_BY_3_TO_5_EXORIBONUCLEASE	REACTOME_MRNA_DECAY_BY_3_TO_5_EXORIBONUCLEASE	1/187	16/13356	0.202066	0.462585	0.364282	WDR61	1
HIV PPIs	REACTOME_NRIF_SIGNALS_CELL_DEATH_FROM_THE_NUCLEUS	REACTOME_NRIF_SIGNALS_CELL_DEATH_FROM_THE_NUCLEUS	1/187	16/13356	0.202066	0.462585	0.364282	SQSTM1	1
HIV PPIs	REACTOME_P75NTR_SIGNALS_VIA_NF_KB	REACTOME_P75NTR_SIGNALS_VIA_NF_KB	1/187	16/13356	0.202066	0.462585	0.364282	SQSTM1	1
HIV PPIs	REACTOME_PI3K_EVENTS_IN_ERBB2_SIGNALING	REACTOME_PI3K_EVENTS_IN_ERBB2_SIGNALING	1/187	16/13356	0.202066	0.462585	0.364282	GRB2	1
HIV PPIs	REACTOME_REGULATION_OF_KIT_SIGNALING	REACTOME_REGULATION_OF_KIT_SIGNALING	1/187	16/13356	0.202066	0.462585	0.364282	GRB2	1
HIV PPIs	REACTOME_SIGNAL_REGULATORY_PROTEIN_FAMILY_INTERACTIONS	REACTOME_SIGNAL_REGULATORY_PROTEIN_FAMILY_INTERACTIONS	1/187	16/13356	0.202066	0.462585	0.364282	GRB2	1
HIV PPIs	REACTOME_SIGNALING_BY_ERBB2_ECD_MUTANTS	REACTOME_SIGNALING_BY_ERBB2_ECD_MUTANTS	1/187	16/13356	0.202066	0.462585	0.364282	GRB2	1
HIV PPIs	REACTOME_SIGNALING_BY_FLT3_ITD_AND_TKD_MUTANTS	REACTOME_SIGNALING_BY_FLT3_ITD_AND_TKD_MUTANTS	1/187	16/13356	0.202066	0.462585	0.364282	GRB2	1
HIV PPIs	REACTOME_THE_NLRP3_INFLAMMASOME	REACTOME_THE_NLRP3_INFLAMMASOME	1/187	16/13356	0.202066	0.462585	0.364282	APP	1
HIV PPIs	WP_OSTEOCLAST_SIGNALING	WP_OSTEOCLAST_SIGNALING	1/187	16/13356	0.202066	0.462585	0.364282	AIMP2	1
HIV PPIs	WP_OXIDATIVE_PHOSPHORYLATION	WP_OXIDATIVE_PHOSPHORYLATION	2/187	60/13356	0.205118	0.468672	0.369075	NDUFB10/NDUFS8	2
HIV PPIs	REACTOME_DNA_DOUBLE_STRAND_BREAK_REPAIR	REACTOME_DNA_DOUBLE_STRAND_BREAK_REPAIR	4/187	168/13356	0.209524	0.471918	0.371632	POLE/HERC2/POLE3/POLE4	4
HIV PPIs	PID_AR_PATHWAY	PID_AR_PATHWAY	2/187	61/13356	0.210245	0.471918	0.371632	CDKN2A/FKBP4	2
HIV PPIs	WP_NOTCH_SIGNALING_PATHWAY	WP_NOTCH_SIGNALING_PATHWAY	2/187	61/13356	0.210245	0.471918	0.371632	SKP1/CUL1	2
HIV PPIs	REACTOME_NEGATIVE_REGULATION_OF_THE_PI3K_AKT_NETWORK	REACTOME_NEGATIVE_REGULATION_OF_THE_PI3K_AKT_NETWORK	3/187	113/13356	0.210793	0.471918	0.371632	PPP2CB/GRB2/PPP2R5E	3
HIV PPIs	BIOCARTA_ARF_PATHWAY	BIOCARTA_ARF_PATHWAY	1/187	17/13356	0.213252	0.471918	0.371632	CDKN2A	1
HIV PPIs	BIOCARTA_SPRY_PATHWAY	BIOCARTA_SPRY_PATHWAY	1/187	17/13356	0.213252	0.471918	0.371632	GRB2	1
HIV PPIs	PID_NFKAPPAB_ATYPICAL_PATHWAY	PID_NFKAPPAB_ATYPICAL_PATHWAY	1/187	17/13356	0.213252	0.471918	0.371632	ARRB2	1
HIV PPIs	REACTOME_BUTYRATE_RESPONSE_FACTOR_1_BRF1_BINDS_AND_DESTABILIZES_MRNA	REACTOME_BUTYRATE_RESPONSE_FACTOR_1_BRF1_BINDS_AND_DESTABILIZES_MRNA	1/187	17/13356	0.213252	0.471918	0.371632	YWHAB	1
HIV PPIs	REACTOME_GAB1_SIGNALOSOME	REACTOME_GAB1_SIGNALOSOME	1/187	17/13356	0.213252	0.471918	0.371632	GRB2	1
HIV PPIs	REACTOME_KSRP_KHSRP_BINDS_AND_DESTABILIZES_MRNA	REACTOME_KSRP_KHSRP_BINDS_AND_DESTABILIZES_MRNA	1/187	17/13356	0.213252	0.471918	0.371632	YWHAZ	1
HIV PPIs	REACTOME_REGULATION_OF_RUNX1_EXPRESSION_AND_ACTIVITY	REACTOME_REGULATION_OF_RUNX1_EXPRESSION_AND_ACTIVITY	1/187	17/13356	0.213252	0.471918	0.371632	CBFB	1
HIV PPIs	REACTOME_SIGNALING_BY_NTRK3_TRKC	REACTOME_SIGNALING_BY_NTRK3_TRKC	1/187	17/13356	0.213252	0.471918	0.371632	GRB2	1
HIV PPIs	REACTOME_TRISTETRAPROLIN_TTP_ZFP36_BINDS_AND_DESTABILIZES_MRNA	REACTOME_TRISTETRAPROLIN_TTP_ZFP36_BINDS_AND_DESTABILIZES_MRNA	1/187	17/13356	0.213252	0.471918	0.371632	YWHAB	1
HIV PPIs	REACTOME_ZINC_TRANSPORTERS	REACTOME_ZINC_TRANSPORTERS	1/187	17/13356	0.213252	0.471918	0.371632	SLC30A7	1
HIV PPIs	SA_PTEN_PATHWAY	SA_PTEN_PATHWAY	1/187	17/13356	0.213252	0.471918	0.371632	GRB2	1
HIV PPIs	SA_TRKA_RECEPTOR	SA_TRKA_RECEPTOR	1/187	17/13356	0.213252	0.471918	0.371632	GRB2	1
HIV PPIs	WP_NOTCH1_REGULATION_OF_ENDOTHELIAL_CELL_CALCIFICATION	WP_NOTCH1_REGULATION_OF_ENDOTHELIAL_CELL_CALCIFICATION	1/187	17/13356	0.213252	0.471918	0.371632	CALU	1
HIV PPIs	WP_GASTRIN_SIGNALING_PATHWAY	WP_GASTRIN_SIGNALING_PATHWAY	3/187	115/13356	0.218087	0.481727	0.379356	CDKN2A/ARRB2/GRB2	3
HIV PPIs	WP_ENDOMETRIAL_CANCER	WP_ENDOMETRIAL_CANCER	2/187	63/13356	0.220539	0.482912	0.380289	CTNNA3/GRB2	2
HIV PPIs	BIOCARTA_MCM_PATHWAY	BIOCARTA_MCM_PATHWAY	1/187	18/13356	0.224281	0.482912	0.380289	MCM6	1
HIV PPIs	BIOCARTA_PTEN_PATHWAY	BIOCARTA_PTEN_PATHWAY	1/187	18/13356	0.224281	0.482912	0.380289	GRB2	1
HIV PPIs	REACTOME_ABC_TRANSPORTERS_IN_LIPID_HOMEOSTASIS	REACTOME_ABC_TRANSPORTERS_IN_LIPID_HOMEOSTASIS	1/187	18/13356	0.224281	0.482912	0.380289	ABCD3	1
HIV PPIs	REACTOME_ACTIVATION_OF_SMO	REACTOME_ACTIVATION_OF_SMO	1/187	18/13356	0.224281	0.482912	0.380289	ARRB2	1
HIV PPIs	REACTOME_GASTRIN_CREB_SIGNALLING_PATHWAY_VIA_PKC_AND_MAPK	REACTOME_GASTRIN_CREB_SIGNALLING_PATHWAY_VIA_PKC_AND_MAPK	1/187	18/13356	0.224281	0.482912	0.380289	GRB2	1
HIV PPIs	REACTOME_PI_3K_CASCADE_FGFR3	REACTOME_PI_3K_CASCADE_FGFR3	1/187	18/13356	0.224281	0.482912	0.380289	GRB2	1
HIV PPIs	REACTOME_SHC_MEDIATED_CASCADE_FGFR3	REACTOME_SHC_MEDIATED_CASCADE_FGFR3	1/187	18/13356	0.224281	0.482912	0.380289	GRB2	1
HIV PPIs	REACTOME_SIGNALING_BY_CYTOSOLIC_FGFR1_FUSION_MUTANTS	REACTOME_SIGNALING_BY_CYTOSOLIC_FGFR1_FUSION_MUTANTS	1/187	18/13356	0.224281	0.482912	0.380289	GRB2	1
HIV PPIs	REACTOME_TIE2_SIGNALING	REACTOME_TIE2_SIGNALING	1/187	18/13356	0.224281	0.482912	0.380289	GRB2	1
HIV PPIs	REACTOME_TP53_REGULATES_TRANSCRIPTION_OF_GENES_INVOLVED_IN_G2_CELL_CYCLE_ARREST	REACTOME_TP53_REGULATES_TRANSCRIPTION_OF_GENES_INVOLVED_IN_G2_CELL_CYCLE_ARREST	1/187	18/13356	0.224281	0.482912	0.380289	PRMT1	1
HIV PPIs	WP_CONGENITAL_GENERALIZED_LIPODYSTROPHY	WP_CONGENITAL_GENERALIZED_LIPODYSTROPHY	1/187	18/13356	0.224281	0.482912	0.380289	GRB2	1
HIV PPIs	WP_ESTROGEN_METABOLISM	WP_ESTROGEN_METABOLISM	1/187	18/13356	0.224281	0.482912	0.380289	COMT	1
HIV PPIs	WP_TCA_CYCLE_AKA_KREBS_OR_CITRIC_ACID_CYCLE	WP_TCA_CYCLE_AKA_KREBS_OR_CITRIC_ACID_CYCLE	1/187	18/13356	0.224281	0.482912	0.380289	SUCLA2	1
HIV PPIs	PID_ERA_GENOMIC_PATHWAY	PID_ERA_GENOMIC_PATHWAY	2/187	64/13356	0.225702	0.485096	0.382009	MPG/NEDD8	2
HIV PPIs	KEGG_GLIOMA	KEGG_GLIOMA	2/187	65/13356	0.230873	0.492141	0.387557	CDKN2A/GRB2	2
HIV PPIs	REACTOME_MITOCHONDRIAL_PROTEIN_IMPORT	REACTOME_MITOCHONDRIAL_PROTEIN_IMPORT	2/187	65/13356	0.230873	0.492141	0.387557	TOMM40/TIMM13	2
HIV PPIs	REACTOME_SIGNALING_BY_BRAF_AND_RAF1_FUSIONS	REACTOME_SIGNALING_BY_BRAF_AND_RAF1_FUSIONS	2/187	65/13356	0.230873	0.492141	0.387557	YWHAB/ARRB2	2
HIV PPIs	BIOCARTA_EPO_PATHWAY	BIOCARTA_EPO_PATHWAY	1/187	19/13356	0.235157	0.492141	0.387557	GRB2	1
HIV PPIs	PID_EPHA2_FWD_PATHWAY	PID_EPHA2_FWD_PATHWAY	1/187	19/13356	0.235157	0.492141	0.387557	GRB2	1
HIV PPIs	REACTOME_CONSTITUTIVE_SIGNALING_BY_LIGAND_RESPONSIVE_EGFR_CANCER_VARIANTS	REACTOME_CONSTITUTIVE_SIGNALING_BY_LIGAND_RESPONSIVE_EGFR_CANCER_VARIANTS	1/187	19/13356	0.235157	0.492141	0.387557	GRB2	1
HIV PPIs	REACTOME_EPHRIN_SIGNALING	REACTOME_EPHRIN_SIGNALING	1/187	19/13356	0.235157	0.492141	0.387557	SDCBP	1
HIV PPIs	REACTOME_NICOTINAMIDE_SALVAGING	REACTOME_NICOTINAMIDE_SALVAGING	1/187	19/13356	0.235157	0.492141	0.387557	PARP4	1
HIV PPIs	REACTOME_PLASMA_LIPOPROTEIN_ASSEMBLY	REACTOME_PLASMA_LIPOPROTEIN_ASSEMBLY	1/187	19/13356	0.235157	0.492141	0.387557	P4HB	1
HIV PPIs	REACTOME_RHO_GTPASES_ACTIVATE_CIT	REACTOME_RHO_GTPASES_ACTIVATE_CIT	1/187	19/13356	0.235157	0.492141	0.387557	PPP1R12A	1
HIV PPIs	REACTOME_RHO_GTPASES_ACTIVATE_ROCKS	REACTOME_RHO_GTPASES_ACTIVATE_ROCKS	1/187	19/13356	0.235157	0.492141	0.387557	PPP1R12A	1
HIV PPIs	REACTOME_SCAVENGING_BY_CLASS_A_RECEPTORS	REACTOME_SCAVENGING_BY_CLASS_A_RECEPTORS	1/187	19/13356	0.235157	0.492141	0.387557	CALR	1
HIV PPIs	REACTOME_SIGNALING_BY_FLT3_FUSION_PROTEINS	REACTOME_SIGNALING_BY_FLT3_FUSION_PROTEINS	1/187	19/13356	0.235157	0.492141	0.387557	GRB2	1
HIV PPIs	REACTOME_VEGFR2_MEDIATED_CELL_PROLIFERATION	REACTOME_VEGFR2_MEDIATED_CELL_PROLIFERATION	1/187	19/13356	0.235157	0.492141	0.387557	AHCYL1	1
HIV PPIs	WP_TP53_NETWORK	WP_TP53_NETWORK	1/187	19/13356	0.235157	0.492141	0.387557	CDKN2A	1
HIV PPIs	PID_HDAC_CLASSI_PATHWAY	PID_HDAC_CLASSI_PATHWAY	2/187	66/13356	0.236053	0.493152	0.388353	RBBP7/RANBP2	2
HIV PPIs	WP_HIPPOMERLIN_SIGNALING_DYSREGULATION	WP_HIPPOMERLIN_SIGNALING_DYSREGULATION	3/187	121/13356	0.240267	0.495763	0.390409	PPP1R12A/DCAF1/DDB1	3
HIV PPIs	PID_TELOMERASE_PATHWAY	PID_TELOMERASE_PATHWAY	2/187	67/13356	0.241238	0.495763	0.390409	YWHAE/RBBP7	2
HIV PPIs	WP_PPAR_SIGNALING_PATHWAY	WP_PPAR_SIGNALING_PATHWAY	2/187	67/13356	0.241238	0.495763	0.390409	ACSL3/SLC27A4	2
HIV PPIs	REACTOME_EXTRACELLULAR_MATRIX_ORGANIZATION	REACTOME_EXTRACELLULAR_MATRIX_ORGANIZATION	6/187	300/13356	0.244456	0.495763	0.390409	P4HA2/P4HB/APP/PLOD1/PLOD2/FBN2	6
HIV PPIs	BIOCARTA_GSK3_PATHWAY	BIOCARTA_GSK3_PATHWAY	1/187	20/13356	0.245881	0.495763	0.390409	EIF2AK2	1
HIV PPIs	BIOCARTA_NGF_PATHWAY	BIOCARTA_NGF_PATHWAY	1/187	20/13356	0.245881	0.495763	0.390409	GRB2	1
HIV PPIs	REACTOME_APOPTOTIC_FACTOR_MEDIATED_RESPONSE	REACTOME_APOPTOTIC_FACTOR_MEDIATED_RESPONSE	1/187	20/13356	0.245881	0.495763	0.390409	CDKN2A	1
HIV PPIs	REACTOME_DISEASES_ASSOCIATED_WITH_N_GLYCOSYLATION_OF_PROTEINS	REACTOME_DISEASES_ASSOCIATED_WITH_N_GLYCOSYLATION_OF_PROTEINS	1/187	20/13356	0.245881	0.495763	0.390409	MOGS	1
HIV PPIs	REACTOME_FRS_MEDIATED_FGFR3_SIGNALING	REACTOME_FRS_MEDIATED_FGFR3_SIGNALING	1/187	20/13356	0.245881	0.495763	0.390409	GRB2	1
HIV PPIs	REACTOME_LISTERIA_MONOCYTOGENES_ENTRY_INTO_HOST_CELLS	REACTOME_LISTERIA_MONOCYTOGENES_ENTRY_INTO_HOST_CELLS	1/187	20/13356	0.245881	0.495763	0.390409	GRB2	1
HIV PPIs	REACTOME_PI_3K_CASCADE_FGFR4	REACTOME_PI_3K_CASCADE_FGFR4	1/187	20/13356	0.245881	0.495763	0.390409	GRB2	1
HIV PPIs	REACTOME_SEMA4D_INDUCED_CELL_MIGRATION_AND_GROWTH_CONE_COLLAPSE	REACTOME_SEMA4D_INDUCED_CELL_MIGRATION_AND_GROWTH_CONE_COLLAPSE	1/187	20/13356	0.245881	0.495763	0.390409	ARHGEF12	1
HIV PPIs	REACTOME_SHC_MEDIATED_CASCADE_FGFR4	REACTOME_SHC_MEDIATED_CASCADE_FGFR4	1/187	20/13356	0.245881	0.495763	0.390409	GRB2	1
HIV PPIs	REACTOME_SIGNALING_BY_KIT_IN_DISEASE	REACTOME_SIGNALING_BY_KIT_IN_DISEASE	1/187	20/13356	0.245881	0.495763	0.390409	GRB2	1
HIV PPIs	REACTOME_SIGNALING_BY_PDGFR_IN_DISEASE	REACTOME_SIGNALING_BY_PDGFR_IN_DISEASE	1/187	20/13356	0.245881	0.495763	0.390409	GRB2	1
HIV PPIs	REACTOME_SIGNALLING_TO_RAS	REACTOME_SIGNALLING_TO_RAS	1/187	20/13356	0.245881	0.495763	0.390409	GRB2	1
HIV PPIs	REACTOME_SUMOYLATION_OF_TRANSCRIPTION_FACTORS	REACTOME_SUMOYLATION_OF_TRANSCRIPTION_FACTORS	1/187	20/13356	0.245881	0.495763	0.390409	CDKN2A	1
HIV PPIs	WP_BMP_SIGNALING_IN_EYELID_DEVELOPMENT	WP_BMP_SIGNALING_IN_EYELID_DEVELOPMENT	1/187	20/13356	0.245881	0.495763	0.390409	FOXC1	1
HIV PPIs	REACTOME_COPII_MEDIATED_VESICLE_TRANSPORT	REACTOME_COPII_MEDIATED_VESICLE_TRANSPORT	2/187	68/13356	0.246429	0.495763	0.390409	LMAN1/LMAN2	2
HIV PPIs	WP_MELANOMA	WP_MELANOMA	2/187	68/13356	0.246429	0.495763	0.390409	CDKN2A/GRB2	2
HIV PPIs	WP_PRADERWILLI_AND_ANGELMAN_SYNDROME	WP_PRADERWILLI_AND_ANGELMAN_SYNDROME	2/187	68/13356	0.246429	0.495763	0.390409	CDKN2A/HERC2	2
HIV PPIs	WP_RAC1PAK1P38MMP2_PATHWAY	WP_RAC1PAK1P38MMP2_PATHWAY	2/187	68/13356	0.246429	0.495763	0.390409	MSH2/GRB2	2
HIV PPIs	KEGG_PPAR_SIGNALING_PATHWAY	KEGG_PPAR_SIGNALING_PATHWAY	2/187	69/13356	0.251625	0.500522	0.394157	ACSL3/SLC27A4	2
HIV PPIs	PID_VEGFR1_2_PATHWAY	PID_VEGFR1_2_PATHWAY	2/187	69/13356	0.251625	0.500522	0.394157	GRB2/FBXW11	2
HIV PPIs	WP_FOLATE_METABOLISM	WP_FOLATE_METABOLISM	2/187	69/13356	0.251625	0.500522	0.394157	FLAD1/AHCY	2
HIV PPIs	BIOCARTA_IGF1_PATHWAY	BIOCARTA_IGF1_PATHWAY	1/187	21/13356	0.256455	0.500522	0.394157	GRB2	1
HIV PPIs	BIOCARTA_IL6_PATHWAY	BIOCARTA_IL6_PATHWAY	1/187	21/13356	0.256455	0.500522	0.394157	GRB2	1
HIV PPIs	BIOCARTA_INSULIN_PATHWAY	BIOCARTA_INSULIN_PATHWAY	1/187	21/13356	0.256455	0.500522	0.394157	GRB2	1
HIV PPIs	PID_S1P_META_PATHWAY	PID_S1P_META_PATHWAY	1/187	21/13356	0.256455	0.500522	0.394157	SGPL1	1
HIV PPIs	REACTOME_ER_QUALITY_CONTROL_COMPARTMENT_ERQC	REACTOME_ER_QUALITY_CONTROL_COMPARTMENT_ERQC	1/187	21/13356	0.256455	0.500522	0.394157	UGGT1	1
HIV PPIs	REACTOME_INFLAMMASOMES	REACTOME_INFLAMMASOMES	1/187	21/13356	0.256455	0.500522	0.394157	APP	1
HIV PPIs	REACTOME_NEGATIVE_REGULATION_OF_MET_ACTIVITY	REACTOME_NEGATIVE_REGULATION_OF_MET_ACTIVITY	1/187	21/13356	0.256455	0.500522	0.394157	GRB2	1
HIV PPIs	REACTOME_PI_3K_CASCADE_FGFR1	REACTOME_PI_3K_CASCADE_FGFR1	1/187	21/13356	0.256455	0.500522	0.394157	GRB2	1
HIV PPIs	REACTOME_RHO_GTPASES_ACTIVATE_PAKS	REACTOME_RHO_GTPASES_ACTIVATE_PAKS	1/187	21/13356	0.256455	0.500522	0.394157	PPP1R12A	1
HIV PPIs	REACTOME_SHC_MEDIATED_CASCADE_FGFR1	REACTOME_SHC_MEDIATED_CASCADE_FGFR1	1/187	21/13356	0.256455	0.500522	0.394157	GRB2	1
HIV PPIs	REACTOME_SYNAPTIC_ADHESION_LIKE_MOLECULES	REACTOME_SYNAPTIC_ADHESION_LIKE_MOLECULES	1/187	21/13356	0.256455	0.500522	0.394157	FLOT1	1
HIV PPIs	WP_HEMATOPOIETIC_STEM_CELL_GENE_REGULATION_BY_GABP_ALPHABETA_COMPLEX	WP_HEMATOPOIETIC_STEM_CELL_GENE_REGULATION_BY_GABP_ALPHABETA_COMPLEX	1/187	21/13356	0.256455	0.500522	0.394157	MCL1	1
HIV PPIs	WP_METABOLISM_OF_SPINGOLIPIDS_IN_ER_AND_GOLGI_APPARATUS	WP_METABOLISM_OF_SPINGOLIPIDS_IN_ER_AND_GOLGI_APPARATUS	1/187	21/13356	0.256455	0.500522	0.394157	SGPL1	1
HIV PPIs	PID_AP1_PATHWAY	PID_AP1_PATHWAY	2/187	70/13356	0.256823	0.500522	0.394157	CDKN2A/CBFB	2
HIV PPIs	REACTOME_RHOB_GTPASE_CYCLE	REACTOME_RHOB_GTPASE_CYCLE	2/187	70/13356	0.256823	0.500522	0.394157	FLOT1/ARHGEF12	2
HIV PPIs	REACTOME_PROCESSING_OF_CAPPED_INTRON_CONTAINING_PRE_MRNA	REACTOME_PROCESSING_OF_CAPPED_INTRON_CONTAINING_PRE_MRNA	5/187	244/13356	0.257034	0.500522	0.394157	RBM17/SNU13/SF3A3/SRRM2/RANBP2	5
HIV PPIs	REACTOME_MHC_CLASS_II_ANTIGEN_PRESENTATION	REACTOME_MHC_CLASS_II_ANTIGEN_PRESENTATION	3/187	126/13356	0.259029	0.500522	0.394157	DYNC1H1/DYNC1I2/DYNC1LI1	3
HIV PPIs	KEGG_SPLICEOSOME	KEGG_SPLICEOSOME	3/187	127/13356	0.262806	0.500522	0.394157	RBM17/SNU13/SF3A3	3
HIV PPIs	BIOCARTA_CREB_PATHWAY	BIOCARTA_CREB_PATHWAY	1/187	22/13356	0.266882	0.500522	0.394157	GRB2	1
HIV PPIs	BIOCARTA_CTLA4_PATHWAY	BIOCARTA_CTLA4_PATHWAY	1/187	22/13356	0.266882	0.500522	0.394157	GRB2	1
HIV PPIs	BIOCARTA_IL2_PATHWAY	BIOCARTA_IL2_PATHWAY	1/187	22/13356	0.266882	0.500522	0.394157	GRB2	1
HIV PPIs	BIOCARTA_MTOR_PATHWAY	BIOCARTA_MTOR_PATHWAY	1/187	22/13356	0.266882	0.500522	0.394157	EIF3A	1
HIV PPIs	KEGG_BETA_ALANINE_METABOLISM	KEGG_BETA_ALANINE_METABOLISM	1/187	22/13356	0.266882	0.500522	0.394157	HADHA	1
HIV PPIs	KEGG_BIOSYNTHESIS_OF_UNSATURATED_FATTY_ACIDS	KEGG_BIOSYNTHESIS_OF_UNSATURATED_FATTY_ACIDS	1/187	22/13356	0.266882	0.500522	0.394157	HADHA	1
HIV PPIs	PID_HEDGEHOG_2PATHWAY	PID_HEDGEHOG_2PATHWAY	1/187	22/13356	0.266882	0.500522	0.394157	ARRB2	1
HIV PPIs	PID_PDGFRA_PATHWAY	PID_PDGFRA_PATHWAY	1/187	22/13356	0.266882	0.500522	0.394157	GRB2	1
HIV PPIs	REACTOME_CITRIC_ACID_CYCLE_TCA_CYCLE	REACTOME_CITRIC_ACID_CYCLE_TCA_CYCLE	1/187	22/13356	0.266882	0.500522	0.394157	SUCLA2	1
HIV PPIs	REACTOME_E2F_MEDIATED_REGULATION_OF_DNA_REPLICATION	REACTOME_E2F_MEDIATED_REGULATION_OF_DNA_REPLICATION	1/187	22/13356	0.266882	0.500522	0.394157	PPP2CB	1
HIV PPIs	REACTOME_ERK_MAPK_TARGETS	REACTOME_ERK_MAPK_TARGETS	1/187	22/13356	0.266882	0.500522	0.394157	PPP2CB	1
HIV PPIs	REACTOME_FRS_MEDIATED_FGFR4_SIGNALING	REACTOME_FRS_MEDIATED_FGFR4_SIGNALING	1/187	22/13356	0.266882	0.500522	0.394157	GRB2	1
HIV PPIs	REACTOME_INSERTION_OF_TAIL_ANCHORED_PROTEINS_INTO_THE_ENDOPLASMIC_RETICULUM_MEMBRANE	REACTOME_INSERTION_OF_TAIL_ANCHORED_PROTEINS_INTO_THE_ENDOPLASMIC_RETICULUM_MEMBRANE	1/187	22/13356	0.266882	0.500522	0.394157	APP	1
HIV PPIs	REACTOME_REGULATION_OF_SIGNALING_BY_CBL	REACTOME_REGULATION_OF_SIGNALING_BY_CBL	1/187	22/13356	0.266882	0.500522	0.394157	GRB2	1
HIV PPIs	REACTOME_SHC1_EVENTS_IN_ERBB2_SIGNALING	REACTOME_SHC1_EVENTS_IN_ERBB2_SIGNALING	1/187	22/13356	0.266882	0.500522	0.394157	GRB2	1
HIV PPIs	WP_FATTY_ACID_BIOSYNTHESIS	WP_FATTY_ACID_BIOSYNTHESIS	1/187	22/13356	0.266882	0.500522	0.394157	ACSL3	1
HIV PPIs	WP_HOSTPATHOGEN_INTERACTION_OF_HUMAN_CORONAVIRUSES_APOPTOSIS	WP_HOSTPATHOGEN_INTERACTION_OF_HUMAN_CORONAVIRUSES_APOPTOSIS	1/187	22/13356	0.266882	0.500522	0.394157	MCL1	1
HIV PPIs	WP_METHIONINE_DE_NOVO_AND_SALVAGE_PATHWAY	WP_METHIONINE_DE_NOVO_AND_SALVAGE_PATHWAY	1/187	22/13356	0.266882	0.500522	0.394157	AHCY	1
HIV PPIs	WP_NAD_BIOSYNTHETIC_PATHWAYS	WP_NAD_BIOSYNTHETIC_PATHWAYS	1/187	22/13356	0.266882	0.500522	0.394157	PARP4	1
HIV PPIs	WP_PROGERIAASSOCIATED_LIPODYSTROPHY	WP_PROGERIAASSOCIATED_LIPODYSTROPHY	1/187	22/13356	0.266882	0.500522	0.394157	RECQL	1
HIV PPIs	WP_SYNTHESIS_OF_CERAMIDES_AND_1DEOXYCERAMIDES	WP_SYNTHESIS_OF_CERAMIDES_AND_1DEOXYCERAMIDES	1/187	22/13356	0.266882	0.500522	0.394157	CERS2	1
HIV PPIs	REACTOME_GLYCOLYSIS	REACTOME_GLYCOLYSIS	2/187	72/13356	0.267224	0.500522	0.394157	PPP2CB/RANBP2	2
HIV PPIs	WP_NONSMALL_CELL_LUNG_CANCER	WP_NONSMALL_CELL_LUNG_CANCER	2/187	72/13356	0.267224	0.500522	0.394157	CDKN2A/GRB2	2
HIV PPIs	KEGG_CHRONIC_MYELOID_LEUKEMIA	KEGG_CHRONIC_MYELOID_LEUKEMIA	2/187	73/13356	0.272425	0.504894	0.3976	CDKN2A/GRB2	2
HIV PPIs	PID_E2F_PATHWAY	PID_E2F_PATHWAY	2/187	73/13356	0.272425	0.504894	0.3976	CDKN2A/MCL1	2
HIV PPIs	REACTOME_DEPOSITION_OF_NEW_CENPA_CONTAINING_NUCLEOSOMES_AT_THE_CENTROMERE	REACTOME_DEPOSITION_OF_NEW_CENPA_CONTAINING_NUCLEOSOMES_AT_THE_CENTROMERE	2/187	73/13356	0.272425	0.504894	0.3976	RUVBL1/RBBP7	2
HIV PPIs	REACTOME_SIGNALING_BY_FGFR2	REACTOME_SIGNALING_BY_FGFR2	2/187	73/13356	0.272425	0.504894	0.3976	PPP2CB/GRB2	2
HIV PPIs	REACTOME_MRNA_SPLICING	REACTOME_MRNA_SPLICING	4/187	190/13356	0.276063	0.504894	0.3976	RBM17/SNU13/SF3A3/SRRM2	4
HIV PPIs	BIOCARTA_CELLCYCLE_PATHWAY	BIOCARTA_CELLCYCLE_PATHWAY	1/187	23/13356	0.277164	0.504894	0.3976	CDKN2A	1
HIV PPIs	BIOCARTA_GLEEVEC_PATHWAY	BIOCARTA_GLEEVEC_PATHWAY	1/187	23/13356	0.277164	0.504894	0.3976	GRB2	1
HIV PPIs	BIOCARTA_HER2_PATHWAY	BIOCARTA_HER2_PATHWAY	1/187	23/13356	0.277164	0.504894	0.3976	GRB2	1
HIV PPIs	BIOCARTA_IGF1R_PATHWAY	BIOCARTA_IGF1R_PATHWAY	1/187	23/13356	0.277164	0.504894	0.3976	GRB2	1
HIV PPIs	REACTOME_FRS_MEDIATED_FGFR1_SIGNALING	REACTOME_FRS_MEDIATED_FGFR1_SIGNALING	1/187	23/13356	0.277164	0.504894	0.3976	GRB2	1
HIV PPIs	REACTOME_PI_3K_CASCADE_FGFR2	REACTOME_PI_3K_CASCADE_FGFR2	1/187	23/13356	0.277164	0.504894	0.3976	GRB2	1
HIV PPIs	REACTOME_TELOMERE_EXTENSION_BY_TELOMERASE	REACTOME_TELOMERE_EXTENSION_BY_TELOMERASE	1/187	23/13356	0.277164	0.504894	0.3976	RUVBL1	1
HIV PPIs	WP_CANCER_IMMUNOTHERAPY_BY_PD1_BLOCKADE	WP_CANCER_IMMUNOTHERAPY_BY_PD1_BLOCKADE	1/187	23/13356	0.277164	0.504894	0.3976	NFAT5	1
HIV PPIs	WP_GDNFRET_SIGNALING_AXIS	WP_GDNFRET_SIGNALING_AXIS	1/187	23/13356	0.277164	0.504894	0.3976	FOXC1	1
HIV PPIs	WP_NANOPARTICLE_TRIGGERED_AUTOPHAGIC_CELL_DEATH	WP_NANOPARTICLE_TRIGGERED_AUTOPHAGIC_CELL_DEATH	1/187	23/13356	0.277164	0.504894	0.3976	AMBRA1	1
HIV PPIs	WP_NRF2ARE_REGULATION	WP_NRF2ARE_REGULATION	1/187	23/13356	0.277164	0.504894	0.3976	AIMP2	1
HIV PPIs	WP_REGULATION_OF_APOPTOSIS_BY_PARATHYROID_HORMONERELATED_PROTEIN	WP_REGULATION_OF_APOPTOSIS_BY_PARATHYROID_HORMONERELATED_PROTEIN	1/187	23/13356	0.277164	0.504894	0.3976	MCL1	1
HIV PPIs	WP_ROLES_OF_CERAMIDES_IN_THE_DEVELOPMENT_OF_INSULIN_RESISTANCE	WP_ROLES_OF_CERAMIDES_IN_THE_DEVELOPMENT_OF_INSULIN_RESISTANCE	1/187	23/13356	0.277164	0.504894	0.3976	EIF2AK2	1
HIV PPIs	KEGG_ARRHYTHMOGENIC_RIGHT_VENTRICULAR_CARDIOMYOPATHY_ARVC	KEGG_ARRHYTHMOGENIC_RIGHT_VENTRICULAR_CARDIOMYOPATHY_ARVC	2/187	74/13356	0.277624	0.504964	0.397655	DSP/CTNNA3	2
HIV PPIs	KEGG_B_CELL_RECEPTOR_SIGNALING_PATHWAY	KEGG_B_CELL_RECEPTOR_SIGNALING_PATHWAY	2/187	75/13356	0.282822	0.50863	0.400542	NFAT5/GRB2	2
HIV PPIs	WP_ARRHYTHMOGENIC_RIGHT_VENTRICULAR_CARDIOMYOPATHY	WP_ARRHYTHMOGENIC_RIGHT_VENTRICULAR_CARDIOMYOPATHY	2/187	75/13356	0.282822	0.50863	0.400542	DSP/CTNNA3	2
HIV PPIs	BIOCARTA_CTCF_PATHWAY	BIOCARTA_CTCF_PATHWAY	1/187	24/13356	0.287302	0.50863	0.400542	CDKN2A	1
HIV PPIs	BIOCARTA_TFF_PATHWAY	BIOCARTA_TFF_PATHWAY	1/187	24/13356	0.287302	0.50863	0.400542	GRB2	1
HIV PPIs	BIOCARTA_TPO_PATHWAY	BIOCARTA_TPO_PATHWAY	1/187	24/13356	0.287302	0.50863	0.400542	GRB2	1
HIV PPIs	BIOCARTA_VDR_PATHWAY	BIOCARTA_VDR_PATHWAY	1/187	24/13356	0.287302	0.50863	0.400542	PRMT1	1
HIV PPIs	BIOCARTA_WNT_PATHWAY	BIOCARTA_WNT_PATHWAY	1/187	24/13356	0.287302	0.50863	0.400542	BTRC	1
HIV PPIs	KEGG_DORSO_VENTRAL_AXIS_FORMATION	KEGG_DORSO_VENTRAL_AXIS_FORMATION	1/187	24/13356	0.287302	0.50863	0.400542	GRB2	1
HIV PPIs	REACTOME_DARPP_32_EVENTS	REACTOME_DARPP_32_EVENTS	1/187	24/13356	0.287302	0.50863	0.400542	PPP2CB	1
HIV PPIs	REACTOME_MTORC1_MEDIATED_SIGNALLING	REACTOME_MTORC1_MEDIATED_SIGNALLING	1/187	24/13356	0.287302	0.50863	0.400542	YWHAB	1
HIV PPIs	REACTOME_RUNX2_REGULATES_OSTEOBLAST_DIFFERENTIATION	REACTOME_RUNX2_REGULATES_OSTEOBLAST_DIFFERENTIATION	1/187	24/13356	0.287302	0.50863	0.400542	CBFB	1
HIV PPIs	REACTOME_SEMA4D_IN_SEMAPHORIN_SIGNALING	REACTOME_SEMA4D_IN_SEMAPHORIN_SIGNALING	1/187	24/13356	0.287302	0.50863	0.400542	ARHGEF12	1
HIV PPIs	REACTOME_SYNTHESIS_OF_BILE_ACIDS_AND_BILE_SALTS_VIA_7ALPHA_HYDROXYCHOLESTEROL	REACTOME_SYNTHESIS_OF_BILE_ACIDS_AND_BILE_SALTS_VIA_7ALPHA_HYDROXYCHOLESTEROL	1/187	24/13356	0.287302	0.50863	0.400542	ACOT8	1
HIV PPIs	REACTOME_SYNTHESIS_OF_VERY_LONG_CHAIN_FATTY_ACYL_COAS	REACTOME_SYNTHESIS_OF_VERY_LONG_CHAIN_FATTY_ACYL_COAS	1/187	24/13356	0.287302	0.50863	0.400542	ACSL3	1
HIV PPIs	SA_B_CELL_RECEPTOR_COMPLEXES	SA_B_CELL_RECEPTOR_COMPLEXES	1/187	24/13356	0.287302	0.50863	0.400542	GRB2	1
HIV PPIs	WP_KALLMANN_SYNDROME	WP_KALLMANN_SYNDROME	1/187	24/13356	0.287302	0.50863	0.400542	GRB2	1
HIV PPIs	WP_MTHFR_DEFICIENCY	WP_MTHFR_DEFICIENCY	1/187	24/13356	0.287302	0.50863	0.400542	COMT	1
HIV PPIs	WP_TRIACYLGLYCERIDE_SYNTHESIS	WP_TRIACYLGLYCERIDE_SYNTHESIS	1/187	24/13356	0.287302	0.50863	0.400542	AGPS	1
HIV PPIs	REACTOME_SIGNALING_BY_NTRKS	REACTOME_SIGNALING_BY_NTRKS	3/187	134/13356	0.289416	0.511615	0.402893	YWHAB/PPP2CB/GRB2	3
HIV PPIs	WP_16P112_PROXIMAL_DELETION_SYNDROME	WP_16P112_PROXIMAL_DELETION_SYNDROME	2/187	77/13356	0.293206	0.516383	0.406647	PPP2CB/PARP4	2
HIV PPIs	BIOCARTA_TOLL_PATHWAY	BIOCARTA_TOLL_PATHWAY	1/187	25/13356	0.297298	0.516383	0.406647	EIF2AK2	1
HIV PPIs	PID_LYMPH_ANGIOGENESIS_PATHWAY	PID_LYMPH_ANGIOGENESIS_PATHWAY	1/187	25/13356	0.297298	0.516383	0.406647	GRB2	1
HIV PPIs	REACTOME_CYCLIN_A_B1_B2_ASSOCIATED_EVENTS_DURING_G2_M_TRANSITION	REACTOME_CYCLIN_A_B1_B2_ASSOCIATED_EVENTS_DURING_G2_M_TRANSITION	1/187	25/13356	0.297298	0.516383	0.406647	PPP2CB	1
HIV PPIs	REACTOME_DOWNSTREAM_SIGNALING_OF_ACTIVATED_FGFR3	REACTOME_DOWNSTREAM_SIGNALING_OF_ACTIVATED_FGFR3	1/187	25/13356	0.297298	0.516383	0.406647	GRB2	1
HIV PPIs	REACTOME_FRS_MEDIATED_FGFR2_SIGNALING	REACTOME_FRS_MEDIATED_FGFR2_SIGNALING	1/187	25/13356	0.297298	0.516383	0.406647	GRB2	1
HIV PPIs	REACTOME_SIGNALING_BY_EGFR_IN_CANCER	REACTOME_SIGNALING_BY_EGFR_IN_CANCER	1/187	25/13356	0.297298	0.516383	0.406647	GRB2	1
HIV PPIs	REACTOME_SIGNALING_BY_ERYTHROPOIETIN	REACTOME_SIGNALING_BY_ERYTHROPOIETIN	1/187	25/13356	0.297298	0.516383	0.406647	GRB2	1
HIV PPIs	REACTOME_SIGNALING_BY_NTRK2_TRKB	REACTOME_SIGNALING_BY_NTRK2_TRKB	1/187	25/13356	0.297298	0.516383	0.406647	GRB2	1
HIV PPIs	REACTOME_TRAF6_MEDIATED_NF_KB_ACTIVATION	REACTOME_TRAF6_MEDIATED_NF_KB_ACTIVATION	1/187	25/13356	0.297298	0.516383	0.406647	APP	1
HIV PPIs	WP_GLYCOSYLATION_AND_RELATED_CONGENITAL_DEFECTS	WP_GLYCOSYLATION_AND_RELATED_CONGENITAL_DEFECTS	1/187	25/13356	0.297298	0.516383	0.406647	MOGS	1
HIV PPIs	WP_HYPOTHESIZED_PATHWAYS_IN_PATHOGENESIS_OF_CARDIOVASCULAR_DISEASE	WP_HYPOTHESIZED_PATHWAYS_IN_PATHOGENESIS_OF_CARDIOVASCULAR_DISEASE	1/187	25/13356	0.297298	0.516383	0.406647	FBN2	1
HIV PPIs	REACTOME_REGULATION_OF_INSULIN_SECRETION	REACTOME_REGULATION_OF_INSULIN_SECRETION	2/187	78/13356	0.298391	0.517529	0.40755	AHCYL1/ACSL3	2
HIV PPIs	PID_P53_DOWNSTREAM_PATHWAY	PID_P53_DOWNSTREAM_PATHWAY	3/187	137/13356	0.300887	0.521102	0.410363	PRMT1/MSH2/MCL1	3
HIV PPIs	PID_MYC_ACTIV_PATHWAY	PID_MYC_ACTIV_PATHWAY	2/187	79/13356	0.303571	0.523473	0.412231	RUVBL1/HUWE1	2
HIV PPIs	REACTOME_PROTEIN_UBIQUITINATION	REACTOME_PROTEIN_UBIQUITINATION	2/187	79/13356	0.303571	0.523473	0.412231	UBA1/WDR61	2
HIV PPIs	REACTOME_RMTS_METHYLATE_HISTONE_ARGININES	REACTOME_RMTS_METHYLATE_HISTONE_ARGININES	2/187	79/13356	0.303571	0.523473	0.412231	PRMT1/RBBP7	2
HIV PPIs	PID_ALK1_PATHWAY	PID_ALK1_PATHWAY	1/187	26/13356	0.307155	0.524358	0.412928	ARRB2	1
HIV PPIs	REACTOME_METAL_ION_SLC_TRANSPORTERS	REACTOME_METAL_ION_SLC_TRANSPORTERS	1/187	26/13356	0.307155	0.524358	0.412928	SLC30A7	1
HIV PPIs	REACTOME_MISCELLANEOUS_TRANSPORT_AND_BINDING_EVENTS	REACTOME_MISCELLANEOUS_TRANSPORT_AND_BINDING_EVENTS	1/187	26/13356	0.307155	0.524358	0.412928	MRS2	1
HIV PPIs	REACTOME_N_GLYCAN_ANTENNAE_ELONGATION_IN_THE_MEDIAL_TRANS_GOLGI	REACTOME_N_GLYCAN_ANTENNAE_ELONGATION_IN_THE_MEDIAL_TRANS_GOLGI	1/187	26/13356	0.307155	0.524358	0.412928	FUT8	1
HIV PPIs	REACTOME_PURINERGIC_SIGNALING_IN_LEISHMANIASIS_INFECTION	REACTOME_PURINERGIC_SIGNALING_IN_LEISHMANIASIS_INFECTION	1/187	26/13356	0.307155	0.524358	0.412928	APP	1
HIV PPIs	REACTOME_SIGNALING_BY_ERBB2_IN_CANCER	REACTOME_SIGNALING_BY_ERBB2_IN_CANCER	1/187	26/13356	0.307155	0.524358	0.412928	GRB2	1
HIV PPIs	WP_EPO_RECEPTOR_SIGNALING	WP_EPO_RECEPTOR_SIGNALING	1/187	26/13356	0.307155	0.524358	0.412928	GRB2	1
HIV PPIs	WP_CLOCKCONTROLLED_AUTOPHAGY_IN_BONE_METABOLISM	WP_CLOCKCONTROLLED_AUTOPHAGY_IN_BONE_METABOLISM	2/187	80/13356	0.308743	0.526087	0.41429	AMBRA1/SQSTM1	2
HIV PPIs	WP_ALZHEIMERS_DISEASE_AND_MIRNA_EFFECTS	WP_ALZHEIMERS_DISEASE_AND_MIRNA_EFFECTS	6/187	327/13356	0.309049	0.526087	0.41429	EIF2AK2/PSMD7/PSMB6/APP/PSMA1/AMBRA1	6
HIV PPIs	REACTOME_RNA_POLYMERASE_II_TRANSCRIBES_SNRNA_GENES	REACTOME_RNA_POLYMERASE_II_TRANSCRIBES_SNRNA_GENES	2/187	81/13356	0.313909	0.527389	0.415315	CCNT1/CDK9	2
HIV PPIs	REACTOME_DEATH_RECEPTOR_SIGNALLING	REACTOME_DEATH_RECEPTOR_SIGNALLING	3/187	141/13356	0.316218	0.527389	0.415315	YWHAE/ARHGEF12/SQSTM1	3
HIV PPIs	BIOCARTA_AT1R_PATHWAY	BIOCARTA_AT1R_PATHWAY	1/187	27/13356	0.316875	0.527389	0.415315	GRB2	1
HIV PPIs	BIOCARTA_EGF_PATHWAY	BIOCARTA_EGF_PATHWAY	1/187	27/13356	0.316875	0.527389	0.415315	GRB2	1
HIV PPIs	BIOCARTA_ERK_PATHWAY	BIOCARTA_ERK_PATHWAY	1/187	27/13356	0.316875	0.527389	0.415315	GRB2	1
HIV PPIs	BIOCARTA_GH_PATHWAY	BIOCARTA_GH_PATHWAY	1/187	27/13356	0.316875	0.527389	0.415315	GRB2	1
HIV PPIs	BIOCARTA_PYK2_PATHWAY	BIOCARTA_PYK2_PATHWAY	1/187	27/13356	0.316875	0.527389	0.415315	GRB2	1
HIV PPIs	PID_GLYPICAN_1PATHWAY	PID_GLYPICAN_1PATHWAY	1/187	27/13356	0.316875	0.527389	0.415315	APP	1
HIV PPIs	REACTOME_DOWNSTREAM_SIGNALING_OF_ACTIVATED_FGFR4	REACTOME_DOWNSTREAM_SIGNALING_OF_ACTIVATED_FGFR4	1/187	27/13356	0.316875	0.527389	0.415315	GRB2	1
HIV PPIs	REACTOME_EFFECTS_OF_PIP2_HYDROLYSIS	REACTOME_EFFECTS_OF_PIP2_HYDROLYSIS	1/187	27/13356	0.316875	0.527389	0.415315	DAGLB	1
HIV PPIs	REACTOME_INSULIN_PROCESSING	REACTOME_INSULIN_PROCESSING	1/187	27/13356	0.316875	0.527389	0.415315	SLC30A7	1
HIV PPIs	REACTOME_INTEGRIN_SIGNALING	REACTOME_INTEGRIN_SIGNALING	1/187	27/13356	0.316875	0.527389	0.415315	GRB2	1
HIV PPIs	REACTOME_INTERLEUKIN_RECEPTOR_SHC_SIGNALING	REACTOME_INTERLEUKIN_RECEPTOR_SHC_SIGNALING	1/187	27/13356	0.316875	0.527389	0.415315	GRB2	1
HIV PPIs	REACTOME_SULFUR_AMINO_ACID_METABOLISM	REACTOME_SULFUR_AMINO_ACID_METABOLISM	1/187	27/13356	0.316875	0.527389	0.415315	AHCY	1
HIV PPIs	SIG_IL4RECEPTOR_IN_B_LYPHOCYTES	SIG_IL4RECEPTOR_IN_B_LYPHOCYTES	1/187	27/13356	0.316875	0.527389	0.415315	GRB2	1
HIV PPIs	WP_7OXOC_AND_7BETAHC_PATHWAYS	WP_7OXOC_AND_7BETAHC_PATHWAYS	1/187	27/13356	0.316875	0.527389	0.415315	ACOT8	1
HIV PPIs	PID_SMAD2_3NUCLEAR_PATHWAY	PID_SMAD2_3NUCLEAR_PATHWAY	2/187	82/13356	0.319065	0.528826	0.416446	CBFB/RBBP7	2
HIV PPIs	REACTOME_ANTIVIRAL_MECHANISM_BY_IFN_STIMULATED_GENES	REACTOME_ANTIVIRAL_MECHANISM_BY_IFN_STIMULATED_GENES	2/187	82/13356	0.319065	0.528826	0.416446	EIF2AK2/RANBP2	2
HIV PPIs	REACTOME_ONCOGENIC_MAPK_SIGNALING	REACTOME_ONCOGENIC_MAPK_SIGNALING	2/187	82/13356	0.319065	0.528826	0.416446	YWHAB/ARRB2	2
HIV PPIs	REACTOME_HATS_ACETYLATE_HISTONES	REACTOME_HATS_ACETYLATE_HISTONES	3/187	142/13356	0.320054	0.52973	0.417158	RUVBL1/HAT1/RBBP7	3
HIV PPIs	REACTOME_RRNA_PROCESSING	REACTOME_RRNA_PROCESSING	4/187	205/13356	0.323261	0.530773	0.41798	DDX49/HEATR1/SNU13/NOL12	4
HIV PPIs	WP_GLIOBLASTOMA_SIGNALING_PATHWAYS	WP_GLIOBLASTOMA_SIGNALING_PATHWAYS	2/187	83/13356	0.324213	0.530773	0.41798	CDKN2A/GRB2	2
HIV PPIs	BIOCARTA_G1_PATHWAY	BIOCARTA_G1_PATHWAY	1/187	28/13356	0.326459	0.530773	0.41798	CDKN2A	1
HIV PPIs	BIOCARTA_PDGF_PATHWAY	BIOCARTA_PDGF_PATHWAY	1/187	28/13356	0.326459	0.530773	0.41798	GRB2	1
HIV PPIs	KEGG_HOMOLOGOUS_RECOMBINATION	KEGG_HOMOLOGOUS_RECOMBINATION	1/187	28/13356	0.326459	0.530773	0.41798	SSBP1	1
HIV PPIs	PID_IL8_CXCR1_PATHWAY	PID_IL8_CXCR1_PATHWAY	1/187	28/13356	0.326459	0.530773	0.41798	ARRB2	1
HIV PPIs	REACTOME_ATTENUATION_PHASE	REACTOME_ATTENUATION_PHASE	1/187	28/13356	0.326459	0.530773	0.41798	FKBP4	1
HIV PPIs	REACTOME_BUDDING_AND_MATURATION_OF_HIV_VIRION	REACTOME_BUDDING_AND_MATURATION_OF_HIV_VIRION	1/187	28/13356	0.326459	0.530773	0.41798	NEDD4L	1
HIV PPIs	REACTOME_FLT3_SIGNALING_IN_DISEASE	REACTOME_FLT3_SIGNALING_IN_DISEASE	1/187	28/13356	0.326459	0.530773	0.41798	GRB2	1
HIV PPIs	REACTOME_PLATELET_CALCIUM_HOMEOSTASIS	REACTOME_PLATELET_CALCIUM_HOMEOSTASIS	1/187	28/13356	0.326459	0.530773	0.41798	ATP2B1	1
HIV PPIs	WP_GASTRIC_CANCER_NETWORK_1	WP_GASTRIC_CANCER_NETWORK_1	1/187	28/13356	0.326459	0.530773	0.41798	RUVBL1	1
HIV PPIs	WP_NANOPARTICLEMEDIATED_ACTIVATION_OF_RECEPTOR_SIGNALING	WP_NANOPARTICLEMEDIATED_ACTIVATION_OF_RECEPTOR_SIGNALING	1/187	28/13356	0.326459	0.530773	0.41798	GRB2	1
HIV PPIs	WP_SPHINGOLIPID_METABOLISM_IN_SENESCENCE	WP_SPHINGOLIPID_METABOLISM_IN_SENESCENCE	1/187	28/13356	0.326459	0.530773	0.41798	CERS2	1
HIV PPIs	PID_CMYB_PATHWAY	PID_CMYB_PATHWAY	2/187	84/13356	0.329351	0.534748	0.42111	CDKN2A/ATP2B1	2
HIV PPIs	BIOCARTA_BIOPEPTIDES_PATHWAY	BIOCARTA_BIOPEPTIDES_PATHWAY	1/187	29/13356	0.335909	0.542448	0.427173	GRB2	1
HIV PPIs	REACTOME_DAP12_SIGNALING	REACTOME_DAP12_SIGNALING	1/187	29/13356	0.335909	0.542448	0.427173	GRB2	1
HIV PPIs	REACTOME_DOWNSTREAM_SIGNAL_TRANSDUCTION	REACTOME_DOWNSTREAM_SIGNAL_TRANSDUCTION	1/187	29/13356	0.335909	0.542448	0.427173	GRB2	1
HIV PPIs	WP_CANNABINOID_RECEPTOR_SIGNALING	WP_CANNABINOID_RECEPTOR_SIGNALING	1/187	29/13356	0.335909	0.542448	0.427173	DAGLB	1
HIV PPIs	REACTOME_ANTIGEN_ACTIVATES_B_CELL_RECEPTOR_BCR_LEADING_TO_GENERATION_OF_SECOND_MESSENGERS	REACTOME_ANTIGEN_ACTIVATES_B_CELL_RECEPTOR_BCR_LEADING_TO_GENERATION_OF_SECOND_MESSENGERS	2/187	86/13356	0.339594	0.545451	0.429538	GRB2/AHCYL1	2
HIV PPIs	REACTOME_FCERI_MEDIATED_CA_2_MOBILIZATION	REACTOME_FCERI_MEDIATED_CA_2_MOBILIZATION	2/187	86/13356	0.339594	0.545451	0.429538	GRB2/AHCYL1	2
HIV PPIs	WP_CLEAR_CELL_RENAL_CELL_CARCINOMA_PATHWAYS	WP_CLEAR_CELL_RENAL_CELL_CARCINOMA_PATHWAYS	2/187	86/13356	0.339594	0.545451	0.429538	PLOD2/SQSTM1	2
HIV PPIs	WP_SELENIUM_MICRONUTRIENT_NETWORK	WP_SELENIUM_MICRONUTRIENT_NETWORK	2/187	86/13356	0.339594	0.545451	0.429538	PRDX4/FLAD1	2
HIV PPIs	REACTOME_SIGNALING_BY_FGFR	REACTOME_SIGNALING_BY_FGFR	2/187	87/13356	0.344699	0.548599	0.432018	PPP2CB/GRB2	2
HIV PPIs	PID_IL2_STAT5_PATHWAY	PID_IL2_STAT5_PATHWAY	1/187	30/13356	0.345227	0.548599	0.432018	GRB2	1
HIV PPIs	PID_RAS_PATHWAY	PID_RAS_PATHWAY	1/187	30/13356	0.345227	0.548599	0.432018	GRB2	1
HIV PPIs	REACTOME_DOWNSTREAM_SIGNALING_OF_ACTIVATED_FGFR2	REACTOME_DOWNSTREAM_SIGNALING_OF_ACTIVATED_FGFR2	1/187	30/13356	0.345227	0.548599	0.432018	GRB2	1
HIV PPIs	REACTOME_SYNTHESIS_OF_ACTIVE_UBIQUITIN_ROLES_OF_E1_AND_E2_ENZYMES	REACTOME_SYNTHESIS_OF_ACTIVE_UBIQUITIN_ROLES_OF_E1_AND_E2_ENZYMES	1/187	30/13356	0.345227	0.548599	0.432018	UBA1	1
HIV PPIs	WP_AUTOPHAGY	WP_AUTOPHAGY	1/187	30/13356	0.345227	0.548599	0.432018	AMBRA1	1
HIV PPIs	WP_GLYCEROPHOSPHOLIPID_BIOSYNTHETIC_PATHWAY	WP_GLYCEROPHOSPHOLIPID_BIOSYNTHETIC_PATHWAY	1/187	30/13356	0.345227	0.548599	0.432018	AGPS	1
HIV PPIs	WP_GPR143_IN_MELANOCYTES_AND_RETINAL_PIGMENT_EPITHELIUM_CELLS	WP_GPR143_IN_MELANOCYTES_AND_RETINAL_PIGMENT_EPITHELIUM_CELLS	1/187	30/13356	0.345227	0.548599	0.432018	ARRB2	1
HIV PPIs	WP_APOPTOSIS	WP_APOPTOSIS	2/187	88/13356	0.34979	0.551453	0.434265	CDKN2A/MCL1	2
HIV PPIs	WP_BARDETBIEDL_SYNDROME	WP_BARDETBIEDL_SYNDROME	2/187	88/13356	0.34979	0.551453	0.434265	SDCCAG8/FLCN	2
HIV PPIs	WP_TCELL_ACTIVATION_SARSCOV2	WP_TCELL_ACTIVATION_SARSCOV2	2/187	88/13356	0.34979	0.551453	0.434265	CDKN2A/GRB2	2
HIV PPIs	KEGG_CITRATE_CYCLE_TCA_CYCLE	KEGG_CITRATE_CYCLE_TCA_CYCLE	1/187	31/13356	0.354416	0.551453	0.434265	SUCLA2	1
HIV PPIs	REACTOME_ACTIVATED_NOTCH1_TRANSMITS_SIGNAL_TO_THE_NUCLEUS	REACTOME_ACTIVATED_NOTCH1_TRANSMITS_SIGNAL_TO_THE_NUCLEUS	1/187	31/13356	0.354416	0.551453	0.434265	ARRB2	1
HIV PPIs	REACTOME_CRISTAE_FORMATION	REACTOME_CRISTAE_FORMATION	1/187	31/13356	0.354416	0.551453	0.434265	TMEM11	1
HIV PPIs	REACTOME_DOWNREGULATION_OF_SMAD2_3_SMAD4_TRANSCRIPTIONAL_ACTIVITY	REACTOME_DOWNREGULATION_OF_SMAD2_3_SMAD4_TRANSCRIPTIONAL_ACTIVITY	1/187	31/13356	0.354416	0.551453	0.434265	NEDD4L	1
HIV PPIs	REACTOME_DOWNSTREAM_SIGNALING_OF_ACTIVATED_FGFR1	REACTOME_DOWNSTREAM_SIGNALING_OF_ACTIVATED_FGFR1	1/187	31/13356	0.354416	0.551453	0.434265	GRB2	1
HIV PPIs	REACTOME_EGFR_DOWNREGULATION	REACTOME_EGFR_DOWNREGULATION	1/187	31/13356	0.354416	0.551453	0.434265	GRB2	1
HIV PPIs	REACTOME_FGFR1_MUTANT_RECEPTOR_ACTIVATION	REACTOME_FGFR1_MUTANT_RECEPTOR_ACTIVATION	1/187	31/13356	0.354416	0.551453	0.434265	GRB2	1
HIV PPIs	REACTOME_MAPK_TARGETS_NUCLEAR_EVENTS_MEDIATED_BY_MAP_KINASES	REACTOME_MAPK_TARGETS_NUCLEAR_EVENTS_MEDIATED_BY_MAP_KINASES	1/187	31/13356	0.354416	0.551453	0.434265	PPP2CB	1
HIV PPIs	REACTOME_NICOTINATE_METABOLISM	REACTOME_NICOTINATE_METABOLISM	1/187	31/13356	0.354416	0.551453	0.434265	PARP4	1
HIV PPIs	REACTOME_RUNX2_REGULATES_BONE_DEVELOPMENT	REACTOME_RUNX2_REGULATES_BONE_DEVELOPMENT	1/187	31/13356	0.354416	0.551453	0.434265	CBFB	1
HIV PPIs	WP_CONSTITUTIVE_ANDROSTANE_RECEPTOR_PATHWAY	WP_CONSTITUTIVE_ANDROSTANE_RECEPTOR_PATHWAY	1/187	31/13356	0.354416	0.551453	0.434265	DNAJC7	1
HIV PPIs	WP_TUMOR_SUPPRESSOR_ACTIVITY_OF_SMARCB1	WP_TUMOR_SUPPRESSOR_ACTIVITY_OF_SMARCB1	1/187	31/13356	0.354416	0.551453	0.434265	CDKN2A	1
HIV PPIs	WP_TYPE_I_INTERFERON_INDUCTION_AND_SIGNALING_DURING_SARSCOV2_INFECTION	WP_TYPE_I_INTERFERON_INDUCTION_AND_SIGNALING_DURING_SARSCOV2_INFECTION	1/187	31/13356	0.354416	0.551453	0.434265	EIF2AK2	1
HIV PPIs	WNT_SIGNALING	WNT_SIGNALING	2/187	89/13356	0.354868	0.551453	0.434265	FBXW11/BTRC	2
HIV PPIs	REACTOME_OPIOID_SIGNALLING	REACTOME_OPIOID_SIGNALLING	2/187	90/13356	0.359932	0.556286	0.438071	PPP2CB/AHCYL1	2
HIV PPIs	REACTOME_SPHINGOLIPID_METABOLISM	REACTOME_SPHINGOLIPID_METABOLISM	2/187	90/13356	0.359932	0.556286	0.438071	SGPL1/CERS2	2
HIV PPIs	PID_ALPHA_SYNUCLEIN_PATHWAY	PID_ALPHA_SYNUCLEIN_PATHWAY	1/187	32/13356	0.363476	0.556286	0.438071	STUB1	1
HIV PPIs	PID_SYNDECAN_4_PATHWAY	PID_SYNDECAN_4_PATHWAY	1/187	32/13356	0.363476	0.556286	0.438071	SDCBP	1
HIV PPIs	PID_WNT_NONCANONICAL_PATHWAY	PID_WNT_NONCANONICAL_PATHWAY	1/187	32/13356	0.363476	0.556286	0.438071	ARRB2	1
HIV PPIs	REACTOME_DNA_STRAND_ELONGATION	REACTOME_DNA_STRAND_ELONGATION	1/187	32/13356	0.363476	0.556286	0.438071	MCM6	1
HIV PPIs	REACTOME_REGULATION_OF_GLUCOKINASE_BY_GLUCOKINASE_REGULATORY_PROTEIN	REACTOME_REGULATION_OF_GLUCOKINASE_BY_GLUCOKINASE_REGULATORY_PROTEIN	1/187	32/13356	0.363476	0.556286	0.438071	RANBP2	1
HIV PPIs	REACTOME_THROMBIN_SIGNALLING_THROUGH_PROTEINASE_ACTIVATED_RECEPTORS_PARS	REACTOME_THROMBIN_SIGNALLING_THROUGH_PROTEINASE_ACTIVATED_RECEPTORS_PARS	1/187	32/13356	0.363476	0.556286	0.438071	ARRB2	1
HIV PPIs	WP_MONOAMINE_TRANSPORT	WP_MONOAMINE_TRANSPORT	1/187	32/13356	0.363476	0.556286	0.438071	PPP2CB	1
HIV PPIs	WP_PREGNANE_X_RECEPTOR_PATHWAY	WP_PREGNANE_X_RECEPTOR_PATHWAY	1/187	32/13356	0.363476	0.556286	0.438071	DNAJC7	1
HIV PPIs	WP_PRION_DISEASE_PATHWAY	WP_PRION_DISEASE_PATHWAY	1/187	32/13356	0.363476	0.556286	0.438071	PDIA3	1
HIV PPIs	REACTOME_METABOLISM_OF_STEROIDS	REACTOME_METABOLISM_OF_STEROIDS	3/187	154/13356	0.36603	0.556286	0.438071	ACOT8/OSBPL3/OSBPL6	3
HIV PPIs	REACTOME_GLUCOSE_METABOLISM	REACTOME_GLUCOSE_METABOLISM	2/187	92/13356	0.370017	0.556286	0.438071	PPP2CB/RANBP2	2
HIV PPIs	REACTOME_UNFOLDED_PROTEIN_RESPONSE_UPR	REACTOME_UNFOLDED_PROTEIN_RESPONSE_UPR	2/187	92/13356	0.370017	0.556286	0.438071	DNAJB11/CALR	2
HIV PPIs	WP_APOPTOSIS_MODULATION_AND_SIGNALING	WP_APOPTOSIS_MODULATION_AND_SIGNALING	2/187	92/13356	0.370017	0.556286	0.438071	CDKN2A/MCL1	2
HIV PPIs	BIOCARTA_BCR_PATHWAY	BIOCARTA_BCR_PATHWAY	1/187	33/13356	0.372409	0.556286	0.438071	GRB2	1
HIV PPIs	BIOCARTA_MET_PATHWAY	BIOCARTA_MET_PATHWAY	1/187	33/13356	0.372409	0.556286	0.438071	GRB2	1
HIV PPIs	KEGG_ETHER_LIPID_METABOLISM	KEGG_ETHER_LIPID_METABOLISM	1/187	33/13356	0.372409	0.556286	0.438071	AGPS	1
HIV PPIs	PID_EPO_PATHWAY	PID_EPO_PATHWAY	1/187	33/13356	0.372409	0.556286	0.438071	GRB2	1
HIV PPIs	PID_INTEGRIN_A4B1_PATHWAY	PID_INTEGRIN_A4B1_PATHWAY	1/187	33/13356	0.372409	0.556286	0.438071	YWHAZ	1
HIV PPIs	PID_NCADHERIN_PATHWAY	PID_NCADHERIN_PATHWAY	1/187	33/13356	0.372409	0.556286	0.438071	DAGLB	1
HIV PPIs	PID_SYNDECAN_2_PATHWAY	PID_SYNDECAN_2_PATHWAY	1/187	33/13356	0.372409	0.556286	0.438071	SDCBP	1
HIV PPIs	REACTOME_CD28_CO_STIMULATION	REACTOME_CD28_CO_STIMULATION	1/187	33/13356	0.372409	0.556286	0.438071	GRB2	1
HIV PPIs	REACTOME_COOPERATION_OF_PREFOLDIN_AND_TRIC_CCT_IN_ACTIN_AND_TUBULIN_FOLDING	REACTOME_COOPERATION_OF_PREFOLDIN_AND_TRIC_CCT_IN_ACTIN_AND_TUBULIN_FOLDING	1/187	33/13356	0.372409	0.556286	0.438071	VBP1	1
HIV PPIs	REACTOME_EXPORT_OF_VIRAL_RIBONUCLEOPROTEINS_FROM_NUCLEUS	REACTOME_EXPORT_OF_VIRAL_RIBONUCLEOPROTEINS_FROM_NUCLEUS	1/187	33/13356	0.372409	0.556286	0.438071	RANBP2	1
HIV PPIs	WP_ALPHA_6_BETA_4_SIGNALING_PATHWAY	WP_ALPHA_6_BETA_4_SIGNALING_PATHWAY	1/187	33/13356	0.372409	0.556286	0.438071	GRB2	1
HIV PPIs	WP_BDNFTRKB_SIGNALING	WP_BDNFTRKB_SIGNALING	1/187	33/13356	0.372409	0.556286	0.438071	GRB2	1
HIV PPIs	WP_CAMKK2_PATHWAY	WP_CAMKK2_PATHWAY	1/187	33/13356	0.372409	0.556286	0.438071	SQSTM1	1
HIV PPIs	WP_DISRUPTION_OF_POSTSYNAPTIC_SIGNALING_BY_CNV	WP_DISRUPTION_OF_POSTSYNAPTIC_SIGNALING_BY_CNV	1/187	33/13356	0.372409	0.556286	0.438071	YWHAG	1
HIV PPIs	WP_HOSTPATHOGEN_INTERACTION_OF_HUMAN_CORONAVIRUSES_INTERFERON_INDUCTION	WP_HOSTPATHOGEN_INTERACTION_OF_HUMAN_CORONAVIRUSES_INTERFERON_INDUCTION	1/187	33/13356	0.372409	0.556286	0.438071	EIF2AK2	1
HIV PPIs	WP_MAPK_CASCADE	WP_MAPK_CASCADE	1/187	33/13356	0.372409	0.556286	0.438071	GRB2	1
HIV PPIs	REACTOME_INFLUENZA_INFECTION	REACTOME_INFLUENZA_INFECTION	3/187	157/13356	0.377465	0.55965	0.44072	EIF2AK2/CALR/RANBP2	3
HIV PPIs	REACTOME_MITOCHONDRIAL_BIOGENESIS	REACTOME_MITOCHONDRIAL_BIOGENESIS	2/187	94/13356	0.380038	0.55965	0.44072	SSBP1/TMEM11	2
HIV PPIs	BIOCARTA_INTEGRIN_PATHWAY	BIOCARTA_INTEGRIN_PATHWAY	1/187	34/13356	0.381218	0.55965	0.44072	GRB2	1
HIV PPIs	BIOCARTA_NUCLEARRS_PATHWAY	BIOCARTA_NUCLEARRS_PATHWAY	1/187	34/13356	0.381218	0.55965	0.44072	ABCD3	1
HIV PPIs	KEGG_BUTANOATE_METABOLISM	KEGG_BUTANOATE_METABOLISM	1/187	34/13356	0.381218	0.55965	0.44072	HADHA	1
HIV PPIs	PID_ATM_PATHWAY	PID_ATM_PATHWAY	1/187	34/13356	0.381218	0.55965	0.44072	YWHAB	1
HIV PPIs	PID_IL1_PATHWAY	PID_IL1_PATHWAY	1/187	34/13356	0.381218	0.55965	0.44072	SQSTM1	1
HIV PPIs	PID_IL8_CXCR2_PATHWAY	PID_IL8_CXCR2_PATHWAY	1/187	34/13356	0.381218	0.55965	0.44072	ARRB2	1
HIV PPIs	REACTOME_METABOLIC_DISORDERS_OF_BIOLOGICAL_OXIDATION_ENZYMES	REACTOME_METABOLIC_DISORDERS_OF_BIOLOGICAL_OXIDATION_ENZYMES	1/187	34/13356	0.381218	0.55965	0.44072	AHCY	1
HIV PPIs	REACTOME_NUCLEAR_IMPORT_OF_REV_PROTEIN	REACTOME_NUCLEAR_IMPORT_OF_REV_PROTEIN	1/187	34/13356	0.381218	0.55965	0.44072	RANBP2	1
HIV PPIs	REACTOME_PLASMA_LIPOPROTEIN_REMODELING	REACTOME_PLASMA_LIPOPROTEIN_REMODELING	1/187	34/13356	0.381218	0.55965	0.44072	P4HB	1
HIV PPIs	REACTOME_THE_PHOTOTRANSDUCTION_CASCADE	REACTOME_THE_PHOTOTRANSDUCTION_CASCADE	1/187	34/13356	0.381218	0.55965	0.44072	NMT1	1
HIV PPIs	REACTOME_TRANSCRIPTIONAL_REGULATION_BY_E2F6	REACTOME_TRANSCRIPTIONAL_REGULATION_BY_E2F6	1/187	34/13356	0.381218	0.55965	0.44072	RBBP7	1
HIV PPIs	WP_HEPATOCYTE_GROWTH_FACTOR_RECEPTOR_SIGNALING	WP_HEPATOCYTE_GROWTH_FACTOR_RECEPTOR_SIGNALING	1/187	34/13356	0.381218	0.55965	0.44072	GRB2	1
HIV PPIs	KEGG_PURINE_METABOLISM	KEGG_PURINE_METABOLISM	3/187	159/13356	0.385065	0.564604	0.444621	POLE/POLE3/POLE4	3
HIV PPIs	PID_ARF6_PATHWAY	PID_ARF6_PATHWAY	1/187	35/13356	0.389904	0.566961	0.446477	ARRB2	1
HIV PPIs	PID_ERBB1_RECEPTOR_PROXIMAL_PATHWAY	PID_ERBB1_RECEPTOR_PROXIMAL_PATHWAY	1/187	35/13356	0.389904	0.566961	0.446477	GRB2	1
HIV PPIs	REACTOME_ONCOGENE_INDUCED_SENESCENCE	REACTOME_ONCOGENE_INDUCED_SENESCENCE	1/187	35/13356	0.389904	0.566961	0.446477	CDKN2A	1
HIV PPIs	REACTOME_SUMOYLATION_OF_SUMOYLATION_PROTEINS	REACTOME_SUMOYLATION_OF_SUMOYLATION_PROTEINS	1/187	35/13356	0.389904	0.566961	0.446477	RANBP2	1
HIV PPIs	WP_NUCLEAR_RECEPTORS_IN_LIPID_METABOLISM_AND_TOXICITY	WP_NUCLEAR_RECEPTORS_IN_LIPID_METABOLISM_AND_TOXICITY	1/187	35/13356	0.389904	0.566961	0.446477	ABCD3	1
HIV PPIs	WP_P38_MAPK_SIGNALING_PATHWAY	WP_P38_MAPK_SIGNALING_PATHWAY	1/187	35/13356	0.389904	0.566961	0.446477	GRB2	1
HIV PPIs	WP_COMPLEMENT_SYSTEM	WP_COMPLEMENT_SYSTEM	2/187	96/13356	0.389993	0.566961	0.446477	CALR/ARRB2	2
HIV PPIs	WP_EPITHELIAL_TO_MESENCHYMAL_TRANSITION_IN_COLORECTAL_CANCER	WP_EPITHELIAL_TO_MESENCHYMAL_TRANSITION_IN_COLORECTAL_CANCER	3/187	161/13356	0.392644	0.570121	0.448966	DSP/STRAP/GRB2	3
HIV PPIs	BIOCARTA_P38MAPK_PATHWAY	BIOCARTA_P38MAPK_PATHWAY	1/187	36/13356	0.398468	0.575779	0.453422	GRB2	1
HIV PPIs	REACTOME_NUCLEAR_PORE_COMPLEX_NPC_DISASSEMBLY	REACTOME_NUCLEAR_PORE_COMPLEX_NPC_DISASSEMBLY	1/187	36/13356	0.398468	0.575779	0.453422	RANBP2	1
HIV PPIs	REACTOME_RHO_GTPASES_ACTIVATE_WASPS_AND_WAVES	REACTOME_RHO_GTPASES_ACTIVATE_WASPS_AND_WAVES	1/187	36/13356	0.398468	0.575779	0.453422	GRB2	1
HIV PPIs	REACTOME_TRANSPORT_OF_THE_SLBP_DEPENDANT_MATURE_MRNA	REACTOME_TRANSPORT_OF_THE_SLBP_DEPENDANT_MATURE_MRNA	1/187	36/13356	0.398468	0.575779	0.453422	RANBP2	1
HIV PPIs	REACTOME_RUNX1_REGULATES_GENES_INVOLVED_IN_MEGAKARYOCYTE_DIFFERENTIATION_AND_PLATELET_FUNCTION	REACTOME_RUNX1_REGULATES_GENES_INVOLVED_IN_MEGAKARYOCYTE_DIFFERENTIATION_AND_PLATELET_FUNCTION	2/187	98/13356	0.399877	0.577117	0.454475	PRMT1/CBFB	2
HIV PPIs	REACTOME_SIGNALING_BY_NUCLEAR_RECEPTORS	REACTOME_SIGNALING_BY_NUCLEAR_RECEPTORS	5/187	297/13356	0.402596	0.577507	0.454782	PRMT1/FKBP4/CCNT1/CDK9/CBFB	5
HIV PPIs	REACTOME_SLC_TRANSPORTER_DISORDERS	REACTOME_SLC_TRANSPORTER_DISORDERS	2/187	99/13356	0.404791	0.577507	0.454782	SLC27A4/RANBP2	2
HIV PPIs	BIOCARTA_IL2RB_PATHWAY	BIOCARTA_IL2RB_PATHWAY	1/187	37/13356	0.406913	0.577507	0.454782	GRB2	1
HIV PPIs	PID_FRA_PATHWAY	PID_FRA_PATHWAY	1/187	37/13356	0.406913	0.577507	0.454782	CDKN2A	1
HIV PPIs	REACTOME_ACTIVATION_OF_ATR_IN_RESPONSE_TO_REPLICATION_STRESS	REACTOME_ACTIVATION_OF_ATR_IN_RESPONSE_TO_REPLICATION_STRESS	1/187	37/13356	0.406913	0.577507	0.454782	MCM6	1
HIV PPIs	REACTOME_DETOXIFICATION_OF_REACTIVE_OXYGEN_SPECIES	REACTOME_DETOXIFICATION_OF_REACTIVE_OXYGEN_SPECIES	1/187	37/13356	0.406913	0.577507	0.454782	P4HB	1
HIV PPIs	REACTOME_INTERACTIONS_OF_REV_WITH_HOST_CELLULAR_PROTEINS	REACTOME_INTERACTIONS_OF_REV_WITH_HOST_CELLULAR_PROTEINS	1/187	37/13356	0.406913	0.577507	0.454782	RANBP2	1
HIV PPIs	REACTOME_INTERACTIONS_OF_VPR_WITH_HOST_CELLULAR_PROTEINS	REACTOME_INTERACTIONS_OF_VPR_WITH_HOST_CELLULAR_PROTEINS	1/187	37/13356	0.406913	0.577507	0.454782	RANBP2	1
HIV PPIs	REACTOME_MOLECULES_ASSOCIATED_WITH_ELASTIC_FIBRES	REACTOME_MOLECULES_ASSOCIATED_WITH_ELASTIC_FIBRES	1/187	37/13356	0.406913	0.577507	0.454782	FBN2	1
HIV PPIs	REACTOME_RUNX1_INTERACTS_WITH_CO_FACTORS_WHOSE_PRECISE_EFFECT_ON_RUNX1_TARGETS_IS_NOT_KNOWN	REACTOME_RUNX1_INTERACTS_WITH_CO_FACTORS_WHOSE_PRECISE_EFFECT_ON_RUNX1_TARGETS_IS_NOT_KNOWN	1/187	37/13356	0.406913	0.577507	0.454782	CBFB	1
HIV PPIs	WP_EFFECT_OF_PROGERIN_ON_GENES_INVOLVED_IN_HUTCHINSONGILFORD_PROGERIA_SYNDROME	WP_EFFECT_OF_PROGERIN_ON_GENES_INVOLVED_IN_HUTCHINSONGILFORD_PROGERIA_SYNDROME	1/187	37/13356	0.406913	0.577507	0.454782	RBBP7	1
HIV PPIs	WP_TYPE_II_INTERFERON_SIGNALING	WP_TYPE_II_INTERFERON_SIGNALING	1/187	37/13356	0.406913	0.577507	0.454782	EIF2AK2	1
HIV PPIs	WP_VITAMIN_DSENSITIVE_CALCIUM_SIGNALING_IN_DEPRESSION	WP_VITAMIN_DSENSITIVE_CALCIUM_SIGNALING_IN_DEPRESSION	1/187	37/13356	0.406913	0.577507	0.454782	ATP2B1	1
HIV PPIs	WP_ZINC_HOMEOSTASIS	WP_ZINC_HOMEOSTASIS	1/187	37/13356	0.406913	0.577507	0.454782	SLC30A7	1
HIV PPIs	WP_WNT_SIGNALING_PATHWAY_AND_PLURIPOTENCY	WP_WNT_SIGNALING_PATHWAY_AND_PLURIPOTENCY	2/187	101/13356	0.414561	0.582409	0.458642	PPP2CB/PPP2R5E	2
HIV PPIs	PID_ERBB4_PATHWAY	PID_ERBB4_PATHWAY	1/187	38/13356	0.41524	0.582409	0.458642	GRB2	1
HIV PPIs	REACTOME_APOPTOTIC_CLEAVAGE_OF_CELLULAR_PROTEINS	REACTOME_APOPTOTIC_CLEAVAGE_OF_CELLULAR_PROTEINS	1/187	38/13356	0.41524	0.582409	0.458642	DSP	1
HIV PPIs	REACTOME_FATTY_ACYL_COA_BIOSYNTHESIS	REACTOME_FATTY_ACYL_COA_BIOSYNTHESIS	1/187	38/13356	0.41524	0.582409	0.458642	ACSL3	1
HIV PPIs	REACTOME_FLT3_SIGNALING	REACTOME_FLT3_SIGNALING	1/187	38/13356	0.41524	0.582409	0.458642	GRB2	1
HIV PPIs	REACTOME_HSF1_DEPENDENT_TRANSACTIVATION	REACTOME_HSF1_DEPENDENT_TRANSACTIVATION	1/187	38/13356	0.41524	0.582409	0.458642	FKBP4	1
HIV PPIs	REACTOME_SIGNALING_BY_FGFR1_IN_DISEASE	REACTOME_SIGNALING_BY_FGFR1_IN_DISEASE	1/187	38/13356	0.41524	0.582409	0.458642	GRB2	1
HIV PPIs	WP_AMYOTROPHIC_LATERAL_SCLEROSIS_ALS	WP_AMYOTROPHIC_LATERAL_SCLEROSIS_ALS	1/187	38/13356	0.41524	0.582409	0.458642	TOMM40	1
HIV PPIs	WP_PHOTODYNAMIC_THERAPYINDUCED_HIF1_SURVIVAL_SIGNALING	WP_PHOTODYNAMIC_THERAPYINDUCED_HIF1_SURVIVAL_SIGNALING	1/187	38/13356	0.41524	0.582409	0.458642	MCL1	1
HIV PPIs	WP_SLEEP_REGULATION	WP_SLEEP_REGULATION	1/187	38/13356	0.41524	0.582409	0.458642	AHCY	1
HIV PPIs	BIOCARTA_FCER1_PATHWAY	BIOCARTA_FCER1_PATHWAY	1/187	39/13356	0.423451	0.589771	0.46444	GRB2	1
HIV PPIs	KEGG_SPHINGOLIPID_METABOLISM	KEGG_SPHINGOLIPID_METABOLISM	1/187	39/13356	0.423451	0.589771	0.46444	SGPL1	1
HIV PPIs	PID_RET_PATHWAY	PID_RET_PATHWAY	1/187	39/13356	0.423451	0.589771	0.46444	GRB2	1
HIV PPIs	REACTOME_PLATELET_AGGREGATION_PLUG_FORMATION	REACTOME_PLATELET_AGGREGATION_PLUG_FORMATION	1/187	39/13356	0.423451	0.589771	0.46444	GRB2	1
HIV PPIs	REACTOME_SUMOYLATION_OF_UBIQUITINYLATION_PROTEINS	REACTOME_SUMOYLATION_OF_UBIQUITINYLATION_PROTEINS	1/187	39/13356	0.423451	0.589771	0.46444	RANBP2	1
HIV PPIs	WP_KISSPEPTINKISSPEPTIN_RECEPTOR_SYSTEM_IN_THE_OVARY	WP_KISSPEPTINKISSPEPTIN_RECEPTOR_SYSTEM_IN_THE_OVARY	1/187	39/13356	0.423451	0.589771	0.46444	ARRB2	1
HIV PPIs	KEGG_TRYPTOPHAN_METABOLISM	KEGG_TRYPTOPHAN_METABOLISM	1/187	40/13356	0.431547	0.594808	0.468406	HADHA	1
HIV PPIs	PID_EPHB_FWD_PATHWAY	PID_EPHB_FWD_PATHWAY	1/187	40/13356	0.431547	0.594808	0.468406	GRB2	1
HIV PPIs	PID_ER_NONGENOMIC_PATHWAY	PID_ER_NONGENOMIC_PATHWAY	1/187	40/13356	0.431547	0.594808	0.468406	GRB2	1
HIV PPIs	PID_FOXM1_PATHWAY	PID_FOXM1_PATHWAY	1/187	40/13356	0.431547	0.594808	0.468406	CDKN2A	1
HIV PPIs	REACTOME_RET_SIGNALING	REACTOME_RET_SIGNALING	1/187	40/13356	0.431547	0.594808	0.468406	GRB2	1
HIV PPIs	REACTOME_RHOU_GTPASE_CYCLE	REACTOME_RHOU_GTPASE_CYCLE	1/187	40/13356	0.431547	0.594808	0.468406	GRB2	1
HIV PPIs	WP_BLADDER_CANCER	WP_BLADDER_CANCER	1/187	40/13356	0.431547	0.594808	0.468406	CDKN2A	1
HIV PPIs	WP_IL5_SIGNALING_PATHWAY	WP_IL5_SIGNALING_PATHWAY	1/187	40/13356	0.431547	0.594808	0.468406	GRB2	1
HIV PPIs	WP_PDGF_PATHWAY	WP_PDGF_PATHWAY	1/187	40/13356	0.431547	0.594808	0.468406	GRB2	1
HIV PPIs	WP_7Q1123_COPY_NUMBER_VARIATION_SYNDROME	WP_7Q1123_COPY_NUMBER_VARIATION_SYNDROME	2/187	106/13356	0.438631	0.601647	0.473792	GRB2/SQSTM1	2
HIV PPIs	PID_ERBB1_INTERNALIZATION_PATHWAY	PID_ERBB1_INTERNALIZATION_PATHWAY	1/187	41/13356	0.43953	0.601647	0.473792	GRB2	1
HIV PPIs	REACTOME_DAG_AND_IP3_SIGNALING	REACTOME_DAG_AND_IP3_SIGNALING	1/187	41/13356	0.43953	0.601647	0.473792	AHCYL1	1
HIV PPIs	REACTOME_MET_PROMOTES_CELL_MOTILITY	REACTOME_MET_PROMOTES_CELL_MOTILITY	1/187	41/13356	0.43953	0.601647	0.473792	GRB2	1
HIV PPIs	REACTOME_MTOR_SIGNALLING	REACTOME_MTOR_SIGNALLING	1/187	41/13356	0.43953	0.601647	0.473792	YWHAB	1
HIV PPIs	REACTOME_TRANSCRIPTIONAL_REGULATION_BY_VENTX	REACTOME_TRANSCRIPTIONAL_REGULATION_BY_VENTX	1/187	41/13356	0.43953	0.601647	0.473792	CDKN2A	1
HIV PPIs	REACTOME_RHO_GTPASE_CYCLE	REACTOME_RHO_GTPASE_CYCLE	7/187	450/13356	0.44297	0.605663	0.476954	LMAN1/FLOT1/DSP/ARHGEF12/GRB2/ABCD3/ACBD5	7
HIV PPIs	KEGG_ALDOSTERONE_REGULATED_SODIUM_REABSORPTION	KEGG_ALDOSTERONE_REGULATED_SODIUM_REABSORPTION	1/187	42/13356	0.447401	0.606443	0.477569	NEDD4L	1
HIV PPIs	KEGG_BLADDER_CANCER	KEGG_BLADDER_CANCER	1/187	42/13356	0.447401	0.606443	0.477569	CDKN2A	1
HIV PPIs	KEGG_TYROSINE_METABOLISM	KEGG_TYROSINE_METABOLISM	1/187	42/13356	0.447401	0.606443	0.477569	COMT	1
HIV PPIs	REACTOME_RND1_GTPASE_CYCLE	REACTOME_RND1_GTPASE_CYCLE	1/187	42/13356	0.447401	0.606443	0.477569	DSP	1
HIV PPIs	REACTOME_RND3_GTPASE_CYCLE	REACTOME_RND3_GTPASE_CYCLE	1/187	42/13356	0.447401	0.606443	0.477569	DSP	1
HIV PPIs	WP_IL2_SIGNALING_PATHWAY	WP_IL2_SIGNALING_PATHWAY	1/187	42/13356	0.447401	0.606443	0.477569	GRB2	1
HIV PPIs	WP_SPLICING_FACTOR_NOVA_REGULATED_SYNAPTIC_PROTEINS	WP_SPLICING_FACTOR_NOVA_REGULATED_SYNAPTIC_PROTEINS	1/187	42/13356	0.447401	0.606443	0.477569	ATP2B1	1
HIV PPIs	KEGG_T_CELL_RECEPTOR_SIGNALING_PATHWAY	KEGG_T_CELL_RECEPTOR_SIGNALING_PATHWAY	2/187	108/13356	0.448108	0.606443	0.477569	NFAT5/GRB2	2
HIV PPIs	WP_THERMOGENESIS	WP_THERMOGENESIS	2/187	108/13356	0.448108	0.606443	0.477569	GRB2/ACSL3	2
HIV PPIs	REACTOME_PHASE_II_CONJUGATION_OF_COMPOUNDS	REACTOME_PHASE_II_CONJUGATION_OF_COMPOUNDS	2/187	109/13356	0.452814	0.61046	0.480732	AHCY/COMT	2
HIV PPIs	REACTOME_FORMATION_OF_INCISION_COMPLEX_IN_GG_NER	REACTOME_FORMATION_OF_INCISION_COMPLEX_IN_GG_NER	1/187	43/13356	0.455163	0.61046	0.480732	DDB1	1
HIV PPIs	REACTOME_SIGNALING_BY_FGFR2_IN_DISEASE	REACTOME_SIGNALING_BY_FGFR2_IN_DISEASE	1/187	43/13356	0.455163	0.61046	0.480732	GRB2	1
HIV PPIs	REACTOME_SIGNALING_BY_SCF_KIT	REACTOME_SIGNALING_BY_SCF_KIT	1/187	43/13356	0.455163	0.61046	0.480732	GRB2	1
HIV PPIs	REACTOME_TRANSPORT_OF_MATURE_MRNAS_DERIVED_FROM_INTRONLESS_TRANSCRIPTS	REACTOME_TRANSPORT_OF_MATURE_MRNAS_DERIVED_FROM_INTRONLESS_TRANSCRIPTS	1/187	43/13356	0.455163	0.61046	0.480732	RANBP2	1
HIV PPIs	REACTOME_TRANSPORT_OF_VITAMINS_NUCLEOSIDES_AND_RELATED_MOLECULES	REACTOME_TRANSPORT_OF_VITAMINS_NUCLEOSIDES_AND_RELATED_MOLECULES	1/187	43/13356	0.455163	0.61046	0.480732	SLC27A4	1
HIV PPIs	WP_4249_HEDGEHOG_SIGNALING_PATHWAY	WP_4249_HEDGEHOG_SIGNALING_PATHWAY	1/187	43/13356	0.455163	0.61046	0.480732	ARRB2	1
HIV PPIs	WP_IL6_SIGNALING_PATHWAY	WP_IL6_SIGNALING_PATHWAY	1/187	43/13356	0.455163	0.61046	0.480732	GRB2	1
HIV PPIs	REACTOME_AMYLOID_FIBER_FORMATION	REACTOME_AMYLOID_FIBER_FORMATION	2/187	110/13356	0.457496	0.612475	0.482319	APP/ITM2B	2
HIV PPIs	BIOCARTA_TCR_PATHWAY	BIOCARTA_TCR_PATHWAY	1/187	44/13356	0.462816	0.612475	0.482319	GRB2	1
HIV PPIs	KEGG_AMINO_SUGAR_AND_NUCLEOTIDE_SUGAR_METABOLISM	KEGG_AMINO_SUGAR_AND_NUCLEOTIDE_SUGAR_METABOLISM	1/187	44/13356	0.462816	0.612475	0.482319	CYB5R1	1
HIV PPIs	PID_CERAMIDE_PATHWAY	PID_CERAMIDE_PATHWAY	1/187	44/13356	0.462816	0.612475	0.482319	EIF2AK2	1
HIV PPIs	PID_ERBB2_ERBB3_PATHWAY	PID_ERBB2_ERBB3_PATHWAY	1/187	44/13356	0.462816	0.612475	0.482319	GRB2	1
HIV PPIs	PID_INSULIN_PATHWAY	PID_INSULIN_PATHWAY	1/187	44/13356	0.462816	0.612475	0.482319	GRB2	1
HIV PPIs	REACTOME_ELASTIC_FIBRE_FORMATION	REACTOME_ELASTIC_FIBRE_FORMATION	1/187	44/13356	0.462816	0.612475	0.482319	FBN2	1
HIV PPIs	REACTOME_INTERLEUKIN_2_FAMILY_SIGNALING	REACTOME_INTERLEUKIN_2_FAMILY_SIGNALING	1/187	44/13356	0.462816	0.612475	0.482319	GRB2	1
HIV PPIs	REACTOME_TAK1_DEPENDENT_IKK_AND_NF_KAPPA_B_ACTIVATION	REACTOME_TAK1_DEPENDENT_IKK_AND_NF_KAPPA_B_ACTIVATION	1/187	44/13356	0.462816	0.612475	0.482319	APP	1
HIV PPIs	REACTOME_VIRAL_MESSENGER_RNA_SYNTHESIS	REACTOME_VIRAL_MESSENGER_RNA_SYNTHESIS	1/187	44/13356	0.462816	0.612475	0.482319	RANBP2	1
HIV PPIs	WP_GENES_CONTROLLING_NEPHROGENESIS	WP_GENES_CONTROLLING_NEPHROGENESIS	1/187	44/13356	0.462816	0.612475	0.482319	FOXC1	1
HIV PPIs	WP_INTERLEUKIN11_SIGNALING_PATHWAY	WP_INTERLEUKIN11_SIGNALING_PATHWAY	1/187	44/13356	0.462816	0.612475	0.482319	GRB2	1
HIV PPIs	PID_RHOA_PATHWAY	PID_RHOA_PATHWAY	1/187	45/13356	0.470362	0.621086	0.4891	PPP1R12A	1
HIV PPIs	REACTOME_DAP12_INTERACTIONS	REACTOME_DAP12_INTERACTIONS	1/187	45/13356	0.470362	0.621086	0.4891	GRB2	1
HIV PPIs	WP_CILIOPATHIES	WP_CILIOPATHIES	3/187	184/13356	0.477601	0.626068	0.493023	SDCCAG8/FLCN/ATXN10	3
HIV PPIs	PID_PS1_PATHWAY	PID_PS1_PATHWAY	1/187	46/13356	0.477802	0.626068	0.493023	FBXW11	1
HIV PPIs	PID_RHOA_REG_PATHWAY	PID_RHOA_REG_PATHWAY	1/187	46/13356	0.477802	0.626068	0.493023	ARHGEF12	1
HIV PPIs	PID_SYNDECAN_1_PATHWAY	PID_SYNDECAN_1_PATHWAY	1/187	46/13356	0.477802	0.626068	0.493023	SDCBP	1
HIV PPIs	PID_TNF_PATHWAY	PID_TNF_PATHWAY	1/187	46/13356	0.477802	0.626068	0.493023	SQSTM1	1
HIV PPIs	REACTOME_SUMOYLATION_OF_DNA_REPLICATION_PROTEINS	REACTOME_SUMOYLATION_OF_DNA_REPLICATION_PROTEINS	1/187	46/13356	0.477802	0.626068	0.493023	RANBP2	1
HIV PPIs	WP_OXYSTEROLS_DERIVED_FROM_CHOLESTEROL	WP_OXYSTEROLS_DERIVED_FROM_CHOLESTEROL	1/187	46/13356	0.477802	0.626068	0.493023	ACOT8	1
HIV PPIs	KEGG_VASCULAR_SMOOTH_MUSCLE_CONTRACTION	KEGG_VASCULAR_SMOOTH_MUSCLE_CONTRACTION	2/187	115/13356	0.480558	0.628989	0.495323	PPP1R12A/ARHGEF12	2
HIV PPIs	PID_DELTA_NP63_PATHWAY	PID_DELTA_NP63_PATHWAY	1/187	47/13356	0.485139	0.629469	0.495702	CDKN2A	1
HIV PPIs	PID_FANCONI_PATHWAY	PID_FANCONI_PATHWAY	1/187	47/13356	0.485139	0.629469	0.495702	FBXW11	1
HIV PPIs	REACTOME_INTERLEUKIN_12_SIGNALING	REACTOME_INTERLEUKIN_12_SIGNALING	1/187	47/13356	0.485139	0.629469	0.495702	P4HB	1
HIV PPIs	REACTOME_RNA_POLYMERASE_I_TRANSCRIPTION_INITIATION	REACTOME_RNA_POLYMERASE_I_TRANSCRIPTION_INITIATION	1/187	47/13356	0.485139	0.629469	0.495702	RBBP7	1
HIV PPIs	REACTOME_SUMOYLATION_OF_RNA_BINDING_PROTEINS	REACTOME_SUMOYLATION_OF_RNA_BINDING_PROTEINS	1/187	47/13356	0.485139	0.629469	0.495702	RANBP2	1
HIV PPIs	WP_CHOLESTEROL_METABOLISM_WITH_BLOCH_AND_KANDUTSCHRUSSELL_PATHWAYS	WP_CHOLESTEROL_METABOLISM_WITH_BLOCH_AND_KANDUTSCHRUSSELL_PATHWAYS	1/187	47/13356	0.485139	0.629469	0.495702	ACSL3	1
HIV PPIs	WP_HEART_DEVELOPMENT	WP_HEART_DEVELOPMENT	1/187	47/13356	0.485139	0.629469	0.495702	FOXC1	1
HIV PPIs	WP_MECHANOREGULATION_AND_PATHOLOGY_OF_YAPTAZ_VIA_HIPPO_AND_NONHIPPO_MECHANISMS	WP_MECHANOREGULATION_AND_PATHOLOGY_OF_YAPTAZ_VIA_HIPPO_AND_NONHIPPO_MECHANISMS	1/187	47/13356	0.485139	0.629469	0.495702	LIMD1	1
HIV PPIs	REACTOME_SUMOYLATION	REACTOME_SUMOYLATION	3/187	187/13356	0.488298	0.632881	0.498388	CDKN2A/HERC2/RANBP2	3
HIV PPIs	PID_AJDISS_2PATHWAY	PID_AJDISS_2PATHWAY	1/187	48/13356	0.492373	0.635406	0.500377	DSP	1
HIV PPIs	REACTOME_IRS_MEDIATED_SIGNALLING	REACTOME_IRS_MEDIATED_SIGNALLING	1/187	48/13356	0.492373	0.635406	0.500377	GRB2	1
HIV PPIs	WP_ENERGY_METABOLISM	WP_ENERGY_METABOLISM	1/187	48/13356	0.492373	0.635406	0.500377	PRMT1	1
HIV PPIs	WP_INTEGRATED_CANCER_PATHWAY	WP_INTEGRATED_CANCER_PATHWAY	1/187	48/13356	0.492373	0.635406	0.500377	MSH2	1
HIV PPIs	PID_ANGIOPOIETIN_RECEPTOR_PATHWAY	PID_ANGIOPOIETIN_RECEPTOR_PATHWAY	1/187	49/13356	0.499506	0.641149	0.5049	GRB2	1
HIV PPIs	REACTOME_RETROGRADE_TRANSPORT_AT_THE_TRANS_GOLGI_NETWORK	REACTOME_RETROGRADE_TRANSPORT_AT_THE_TRANS_GOLGI_NETWORK	1/187	49/13356	0.499506	0.641149	0.5049	GOLGA1	1
HIV PPIs	REACTOME_TP53_REGULATES_TRANSCRIPTION_OF_CELL_CYCLE_GENES	REACTOME_TP53_REGULATES_TRANSCRIPTION_OF_CELL_CYCLE_GENES	1/187	49/13356	0.499506	0.641149	0.5049	PRMT1	1
HIV PPIs	WP_MIRNA_REGULATION_OF_PROSTATE_CANCER_SIGNALING_PATHWAYS	WP_MIRNA_REGULATION_OF_PROSTATE_CANCER_SIGNALING_PATHWAYS	1/187	49/13356	0.499506	0.641149	0.5049	GRB2	1
HIV PPIs	WP_PHOSPHOINOSITIDES_METABOLISM	WP_PHOSPHOINOSITIDES_METABOLISM	1/187	49/13356	0.499506	0.641149	0.5049	PIP4P1	1
HIV PPIs	REACTOME_IRE1ALPHA_ACTIVATES_CHAPERONES	REACTOME_IRE1ALPHA_ACTIVATES_CHAPERONES	1/187	50/13356	0.50654	0.648783	0.510911	DNAJB11	1
HIV PPIs	REACTOME_SIGNALING_BY_EGFR	REACTOME_SIGNALING_BY_EGFR	1/187	50/13356	0.50654	0.648783	0.510911	GRB2	1
HIV PPIs	REACTOME_L1CAM_INTERACTIONS	REACTOME_L1CAM_INTERACTIONS	2/187	121/13356	0.507429	0.649226	0.51126	SDCBP/CNTNAP1	2
HIV PPIs	BIOCARTA_NFAT_PATHWAY	BIOCARTA_NFAT_PATHWAY	1/187	51/13356	0.513475	0.653463	0.514597	CALR	1
HIV PPIs	PID_CASPASE_PATHWAY	PID_CASPASE_PATHWAY	1/187	51/13356	0.513475	0.653463	0.514597	APP	1
HIV PPIs	REACTOME_DISEASES_OF_DNA_REPAIR	REACTOME_DISEASES_OF_DNA_REPAIR	1/187	51/13356	0.513475	0.653463	0.514597	MSH2	1
HIV PPIs	REACTOME_EXTENSION_OF_TELOMERES	REACTOME_EXTENSION_OF_TELOMERES	1/187	51/13356	0.513475	0.653463	0.514597	RUVBL1	1
HIV PPIs	WP_WNT_SIGNALING_PATHWAY	WP_WNT_SIGNALING_PATHWAY	1/187	51/13356	0.513475	0.653463	0.514597	ARRB2	1
HIV PPIs	BIOCARTA_PPARA_PATHWAY	BIOCARTA_PPARA_PATHWAY	1/187	52/13356	0.520313	0.657532	0.517801	MRPL11	1
HIV PPIs	PID_KIT_PATHWAY	PID_KIT_PATHWAY	1/187	52/13356	0.520313	0.657532	0.517801	GRB2	1
HIV PPIs	PID_PTP1B_PATHWAY	PID_PTP1B_PATHWAY	1/187	52/13356	0.520313	0.657532	0.517801	GRB2	1
HIV PPIs	REACTOME_APOPTOTIC_EXECUTION_PHASE	REACTOME_APOPTOTIC_EXECUTION_PHASE	1/187	52/13356	0.520313	0.657532	0.517801	DSP	1
HIV PPIs	WP_NETRINUNC5B_SIGNALING_PATHWAY	WP_NETRINUNC5B_SIGNALING_PATHWAY	1/187	52/13356	0.520313	0.657532	0.517801	ARHGEF12	1
HIV PPIs	WP_ONECARBON_METABOLISM_AND_RELATED_PATHWAYS	WP_ONECARBON_METABOLISM_AND_RELATED_PATHWAYS	1/187	52/13356	0.520313	0.657532	0.517801	AHCYL1	1
HIV PPIs	REACTOME_METABOLISM_OF_WATER_SOLUBLE_VITAMINS_AND_COFACTORS	REACTOME_METABOLISM_OF_WATER_SOLUBLE_VITAMINS_AND_COFACTORS	2/187	124/13356	0.520523	0.657532	0.517801	PARP4/FLAD1	2
HIV PPIs	KEGG_AMYOTROPHIC_LATERAL_SCLEROSIS_ALS	KEGG_AMYOTROPHIC_LATERAL_SCLEROSIS_ALS	1/187	53/13356	0.527055	0.661587	0.520994	TOMM40	1
HIV PPIs	PID_CD8_TCR_PATHWAY	PID_CD8_TCR_PATHWAY	1/187	53/13356	0.527055	0.661587	0.520994	GRB2	1
HIV PPIs	REACTOME_FORMATION_OF_TC_NER_PRE_INCISION_COMPLEX	REACTOME_FORMATION_OF_TC_NER_PRE_INCISION_COMPLEX	1/187	53/13356	0.527055	0.661587	0.520994	DDB1	1
HIV PPIs	REACTOME_NUCLEAR_ENVELOPE_BREAKDOWN	REACTOME_NUCLEAR_ENVELOPE_BREAKDOWN	1/187	53/13356	0.527055	0.661587	0.520994	RANBP2	1
HIV PPIs	REACTOME_RHOD_GTPASE_CYCLE	REACTOME_RHOD_GTPASE_CYCLE	1/187	53/13356	0.527055	0.661587	0.520994	LMAN1	1
HIV PPIs	WP_COPPER_HOMEOSTASIS	WP_COPPER_HOMEOSTASIS	1/187	53/13356	0.527055	0.661587	0.520994	APP	1
HIV PPIs	REACTOME_OXIDATIVE_STRESS_INDUCED_SENESCENCE	REACTOME_OXIDATIVE_STRESS_INDUCED_SENESCENCE	2/187	126/13356	0.529124	0.662163	0.521448	CDKN2A/RBBP7	2
HIV PPIs	KEGG_ARGININE_AND_PROLINE_METABOLISM	KEGG_ARGININE_AND_PROLINE_METABOLISM	1/187	54/13356	0.533703	0.662163	0.521448	P4HA2	1
HIV PPIs	KEGG_VIBRIO_CHOLERAE_INFECTION	KEGG_VIBRIO_CHOLERAE_INFECTION	1/187	54/13356	0.533703	0.662163	0.521448	PDIA4	1
HIV PPIs	PID_TAP63_PATHWAY	PID_TAP63_PATHWAY	1/187	54/13356	0.533703	0.662163	0.521448	CDKN2A	1
HIV PPIs	REACTOME_G_PROTEIN_MEDIATED_EVENTS	REACTOME_G_PROTEIN_MEDIATED_EVENTS	1/187	54/13356	0.533703	0.662163	0.521448	AHCYL1	1
HIV PPIs	REACTOME_INSULIN_RECEPTOR_SIGNALLING_CASCADE	REACTOME_INSULIN_RECEPTOR_SIGNALLING_CASCADE	1/187	54/13356	0.533703	0.662163	0.521448	GRB2	1
HIV PPIs	REACTOME_SIGNALING_BY_TYPE_1_INSULIN_LIKE_GROWTH_FACTOR_1_RECEPTOR_IGF1R	REACTOME_SIGNALING_BY_TYPE_1_INSULIN_LIKE_GROWTH_FACTOR_1_RECEPTOR_IGF1R	1/187	54/13356	0.533703	0.662163	0.521448	GRB2	1
HIV PPIs	REACTOME_SNRNP_ASSEMBLY	REACTOME_SNRNP_ASSEMBLY	1/187	54/13356	0.533703	0.662163	0.521448	RANBP2	1
HIV PPIs	WP_IL4_SIGNALING_PATHWAY	WP_IL4_SIGNALING_PATHWAY	1/187	54/13356	0.533703	0.662163	0.521448	GRB2	1
HIV PPIs	WP_INTERFERON_TYPE_I_SIGNALING_PATHWAYS	WP_INTERFERON_TYPE_I_SIGNALING_PATHWAYS	1/187	54/13356	0.533703	0.662163	0.521448	PRMT1	1
HIV PPIs	REACTOME_CHROMATIN_MODIFYING_ENZYMES	REACTOME_CHROMATIN_MODIFYING_ENZYMES	4/187	274/13356	0.53686	0.662163	0.521448	PRMT1/RUVBL1/HAT1/RBBP7	4
HIV PPIs	REACTOME_GLYCEROPHOSPHOLIPID_BIOSYNTHESIS	REACTOME_GLYCEROPHOSPHOLIPID_BIOSYNTHESIS	2/187	128/13356	0.537619	0.662163	0.521448	HADHA/HADHB	2
HIV PPIs	KEGG_STEROID_HORMONE_BIOSYNTHESIS	KEGG_STEROID_HORMONE_BIOSYNTHESIS	1/187	55/13356	0.540258	0.662163	0.521448	COMT	1
HIV PPIs	PID_FGF_PATHWAY	PID_FGF_PATHWAY	1/187	55/13356	0.540258	0.662163	0.521448	GRB2	1
HIV PPIs	PID_IL2_1PATHWAY	PID_IL2_1PATHWAY	1/187	55/13356	0.540258	0.662163	0.521448	GRB2	1
HIV PPIs	REACTOME_ION_TRANSPORT_BY_P_TYPE_ATPASES	REACTOME_ION_TRANSPORT_BY_P_TYPE_ATPASES	1/187	55/13356	0.540258	0.662163	0.521448	ATP2B1	1
HIV PPIs	REACTOME_PYRUVATE_METABOLISM_AND_CITRIC_ACID_TCA_CYCLE	REACTOME_PYRUVATE_METABOLISM_AND_CITRIC_ACID_TCA_CYCLE	1/187	55/13356	0.540258	0.662163	0.521448	SUCLA2	1
HIV PPIs	REACTOME_TRANSCRIPTIONAL_ACTIVATION_OF_MITOCHONDRIAL_BIOGENESIS	REACTOME_TRANSCRIPTIONAL_ACTIVATION_OF_MITOCHONDRIAL_BIOGENESIS	1/187	55/13356	0.540258	0.662163	0.521448	SSBP1	1
HIV PPIs	WP_CARDIAC_HYPERTROPHIC_RESPONSE	WP_CARDIAC_HYPERTROPHIC_RESPONSE	1/187	55/13356	0.540258	0.662163	0.521448	CDK9	1
HIV PPIs	WP_DNA_IRDOUBLE_STRAND_BREAKS_AND_CELLULAR_RESPONSE_VIA_ATM	WP_DNA_IRDOUBLE_STRAND_BREAKS_AND_CELLULAR_RESPONSE_VIA_ATM	1/187	55/13356	0.540258	0.662163	0.521448	CDKN2A	1
HIV PPIs	WP_IL1_SIGNALING_PATHWAY	WP_IL1_SIGNALING_PATHWAY	1/187	55/13356	0.540258	0.662163	0.521448	SQSTM1	1
HIV PPIs	WP_PATHOGENIC_ESCHERICHIA_COLI_INFECTION	WP_PATHOGENIC_ESCHERICHIA_COLI_INFECTION	1/187	55/13356	0.540258	0.662163	0.521448	YWHAZ	1
HIV PPIs	WP_RANKLRANK_SIGNALING_PATHWAY	WP_RANKLRANK_SIGNALING_PATHWAY	1/187	55/13356	0.540258	0.662163	0.521448	SQSTM1	1
HIV PPIs	KEGG_AXON_GUIDANCE	KEGG_AXON_GUIDANCE	2/187	129/13356	0.541828	0.662609	0.521799	ARHGEF12/NFAT5	2
HIV PPIs	REACTOME_FORMATION_OF_THE_CORNIFIED_ENVELOPE	REACTOME_FORMATION_OF_THE_CORNIFIED_ENVELOPE	2/187	129/13356	0.541828	0.662609	0.521799	DSC3/DSP	2
HIV PPIs	REACTOME_CARDIAC_CONDUCTION	REACTOME_CARDIAC_CONDUCTION	2/187	130/13356	0.54601	0.662609	0.521799	AHCYL1/ATP2B1	2
HIV PPIs	WP_22Q112_COPY_NUMBER_VARIATION_SYNDROME	WP_22Q112_COPY_NUMBER_VARIATION_SYNDROME	2/187	130/13356	0.54601	0.662609	0.521799	FOXC1/COMT	2
HIV PPIs	KEGG_PATHOGENIC_ESCHERICHIA_COLI_INFECTION	KEGG_PATHOGENIC_ESCHERICHIA_COLI_INFECTION	1/187	56/13356	0.546722	0.662609	0.521799	YWHAZ	1
HIV PPIs	PID_TXA2PATHWAY	PID_TXA2PATHWAY	1/187	56/13356	0.546722	0.662609	0.521799	ARRB2	1
HIV PPIs	REACTOME_DEADENYLATION_DEPENDENT_MRNA_DECAY	REACTOME_DEADENYLATION_DEPENDENT_MRNA_DECAY	1/187	56/13356	0.546722	0.662609	0.521799	WDR61	1
HIV PPIs	REACTOME_NUCLEOTIDE_BINDING_DOMAIN_LEUCINE_RICH_REPEAT_CONTAINING_RECEPTOR_NLR_SIGNALING_PATHWAYS	REACTOME_NUCLEOTIDE_BINDING_DOMAIN_LEUCINE_RICH_REPEAT_CONTAINING_RECEPTOR_NLR_SIGNALING_PATHWAYS	1/187	56/13356	0.546722	0.662609	0.521799	APP	1
HIV PPIs	REACTOME_RECOGNITION_AND_ASSOCIATION_OF_DNA_GLYCOSYLASE_WITH_SITE_CONTAINING_AN_AFFECTED_PURINE	REACTOME_RECOGNITION_AND_ASSOCIATION_OF_DNA_GLYCOSYLASE_WITH_SITE_CONTAINING_AN_AFFECTED_PURINE	1/187	56/13356	0.546722	0.662609	0.521799	MPG	1
HIV PPIs	WP_HEPATITIS_C_AND_HEPATOCELLULAR_CARCINOMA	WP_HEPATITIS_C_AND_HEPATOCELLULAR_CARCINOMA	1/187	56/13356	0.546722	0.662609	0.521799	GRB2	1
HIV PPIs	WP_MITOCHONDRIAL_COMPLEX_I_ASSEMBLY_MODEL_OXPHOS_SYSTEM	WP_MITOCHONDRIAL_COMPLEX_I_ASSEMBLY_MODEL_OXPHOS_SYSTEM	1/187	56/13356	0.546722	0.662609	0.521799	NDUFB10	1
HIV PPIs	KEGG_ACUTE_MYELOID_LEUKEMIA	KEGG_ACUTE_MYELOID_LEUKEMIA	1/187	57/13356	0.553095	0.667625	0.525749	GRB2	1
HIV PPIs	PID_SHP2_PATHWAY	PID_SHP2_PATHWAY	1/187	57/13356	0.553095	0.667625	0.525749	GRB2	1
HIV PPIs	REACTOME_INTERLEUKIN_12_FAMILY_SIGNALING	REACTOME_INTERLEUKIN_12_FAMILY_SIGNALING	1/187	57/13356	0.553095	0.667625	0.525749	P4HB	1
HIV PPIs	WP_NEUROGENESIS_REGULATION_IN_THE_OLFACTORY_EPITHELIUM	WP_NEUROGENESIS_REGULATION_IN_THE_OLFACTORY_EPITHELIUM	1/187	57/13356	0.553095	0.667625	0.525749	APP	1
HIV PPIs	KEGG_TIGHT_JUNCTION	KEGG_TIGHT_JUNCTION	2/187	132/13356	0.554294	0.668397	0.526357	CTNNA3/PPP2CB	2
HIV PPIs	REACTOME_SIGNALING_BY_ERBB4	REACTOME_SIGNALING_BY_ERBB4	1/187	58/13356	0.559379	0.672493	0.529583	GRB2	1
HIV PPIs	REACTOME_SIGNALING_BY_PDGF	REACTOME_SIGNALING_BY_PDGF	1/187	58/13356	0.559379	0.672493	0.529583	GRB2	1
HIV PPIs	WP_COMPLEMENT_AND_COAGULATION_CASCADES	WP_COMPLEMENT_AND_COAGULATION_CASCADES	1/187	58/13356	0.559379	0.672493	0.529583	LMAN1	1
HIV PPIs	KEGG_RNA_DEGRADATION	KEGG_RNA_DEGRADATION	1/187	59/13356	0.565575	0.673841	0.530644	WDR61	1
HIV PPIs	PID_ATF2_PATHWAY	PID_ATF2_PATHWAY	1/187	59/13356	0.565575	0.673841	0.530644	CBFB	1
HIV PPIs	PID_FAK_PATHWAY	PID_FAK_PATHWAY	1/187	59/13356	0.565575	0.673841	0.530644	GRB2	1
HIV PPIs	REACTOME_ARACHIDONIC_ACID_METABOLISM	REACTOME_ARACHIDONIC_ACID_METABOLISM	1/187	59/13356	0.565575	0.673841	0.530644	PON2	1
HIV PPIs	REACTOME_E3_UBIQUITIN_LIGASES_UBIQUITINATE_TARGET_PROTEINS	REACTOME_E3_UBIQUITIN_LIGASES_UBIQUITINATE_TARGET_PROTEINS	1/187	59/13356	0.565575	0.673841	0.530644	WDR61	1
HIV PPIs	REACTOME_NRAGE_SIGNALS_DEATH_THROUGH_JNK	REACTOME_NRAGE_SIGNALS_DEATH_THROUGH_JNK	1/187	59/13356	0.565575	0.673841	0.530644	ARHGEF12	1
HIV PPIs	REACTOME_TRNA_PROCESSING_IN_THE_NUCLEUS	REACTOME_TRNA_PROCESSING_IN_THE_NUCLEUS	1/187	59/13356	0.565575	0.673841	0.530644	RANBP2	1
HIV PPIs	WP_KIT_RECEPTOR_SIGNALING_PATHWAY	WP_KIT_RECEPTOR_SIGNALING_PATHWAY	1/187	59/13356	0.565575	0.673841	0.530644	GRB2	1
HIV PPIs	WP_MET_IN_TYPE_1_PAPILLARY_RENAL_CELL_CARCINOMA	WP_MET_IN_TYPE_1_PAPILLARY_RENAL_CELL_CARCINOMA	1/187	59/13356	0.565575	0.673841	0.530644	GRB2	1
HIV PPIs	REACTOME_PHOSPHOLIPID_METABOLISM	REACTOME_PHOSPHOLIPID_METABOLISM	3/187	211/13356	0.569729	0.678114	0.534009	HADHA/PIP4P1/HADHB	3
HIV PPIs	WP_MEASLES_VIRUS_INFECTION	WP_MEASLES_VIRUS_INFECTION	2/187	136/13356	0.570543	0.678406	0.534239	EIF2AK2/EIF3H	2
HIV PPIs	PID_FCER1_PATHWAY	PID_FCER1_PATHWAY	1/187	60/13356	0.571685	0.678414	0.534246	GRB2	1
HIV PPIs	WP_DEVELOPMENT_OF_URETERIC_COLLECTION_SYSTEM	WP_DEVELOPMENT_OF_URETERIC_COLLECTION_SYSTEM	1/187	60/13356	0.571685	0.678414	0.534246	FOXC1	1
HIV PPIs	KEGG_INSULIN_SIGNALING_PATHWAY	KEGG_INSULIN_SIGNALING_PATHWAY	2/187	137/13356	0.574537	0.680448	0.535847	FLOT1/GRB2	2
HIV PPIs	KEGG_NATURAL_KILLER_CELL_MEDIATED_CYTOTOXICITY	KEGG_NATURAL_KILLER_CELL_MEDIATED_CYTOTOXICITY	2/187	137/13356	0.574537	0.680448	0.535847	NFAT5/GRB2	2
HIV PPIs	REACTOME_NUCLEAR_EVENTS_KINASE_AND_TRANSCRIPTION_FACTOR_ACTIVATION	REACTOME_NUCLEAR_EVENTS_KINASE_AND_TRANSCRIPTION_FACTOR_ACTIVATION	1/187	61/13356	0.577709	0.682851	0.537739	PPP2CB	1
HIV PPIs	REACTOME_REGULATION_OF_PTEN_GENE_TRANSCRIPTION	REACTOME_REGULATION_OF_PTEN_GENE_TRANSCRIPTION	1/187	61/13356	0.577709	0.682851	0.537739	RBBP7	1
HIV PPIs	KEGG_COLORECTAL_CANCER	KEGG_COLORECTAL_CANCER	1/187	62/13356	0.583648	0.687153	0.541127	MSH2	1
HIV PPIs	WP_DYRK1A	WP_DYRK1A	1/187	62/13356	0.583648	0.687153	0.541127	APP	1
HIV PPIs	WP_OXIDATION_BY_CYTOCHROME_P450	WP_OXIDATION_BY_CYTOCHROME_P450	1/187	62/13356	0.583648	0.687153	0.541127	CYB5R1	1
HIV PPIs	WP_TCELL_ANTIGEN_RECEPTOR_TCR_PATHWAY_DURING_STAPHYLOCOCCUS_AUREUS_INFECTION	WP_TCELL_ANTIGEN_RECEPTOR_TCR_PATHWAY_DURING_STAPHYLOCOCCUS_AUREUS_INFECTION	1/187	62/13356	0.583648	0.687153	0.541127	GRB2	1
HIV PPIs	REACTOME_G_ALPHA_Q_SIGNALLING_EVENTS	REACTOME_G_ALPHA_Q_SIGNALLING_EVENTS	3/187	216/13356	0.585672	0.687948	0.541753	APP/GRB2/DAGLB	3
HIV PPIs	REACTOME_CHROMOSOME_MAINTENANCE	REACTOME_CHROMOSOME_MAINTENANCE	2/187	140/13356	0.58636	0.687948	0.541753	RUVBL1/RBBP7	2
HIV PPIs	PID_BCR_5PATHWAY	PID_BCR_5PATHWAY	1/187	63/13356	0.589505	0.687948	0.541753	GRB2	1
HIV PPIs	PID_MYC_REPRESS_PATHWAY	PID_MYC_REPRESS_PATHWAY	1/187	63/13356	0.589505	0.687948	0.541753	CSDE1	1
HIV PPIs	REACTOME_BASE_EXCISION_REPAIR_AP_SITE_FORMATION	REACTOME_BASE_EXCISION_REPAIR_AP_SITE_FORMATION	1/187	63/13356	0.589505	0.687948	0.541753	MPG	1
HIV PPIs	REACTOME_NCAM_SIGNALING_FOR_NEURITE_OUT_GROWTH	REACTOME_NCAM_SIGNALING_FOR_NEURITE_OUT_GROWTH	1/187	63/13356	0.589505	0.687948	0.541753	GRB2	1
HIV PPIs	REACTOME_SIGNALING_BY_FGFR_IN_DISEASE	REACTOME_SIGNALING_BY_FGFR_IN_DISEASE	1/187	63/13356	0.589505	0.687948	0.541753	GRB2	1
HIV PPIs	WP_2Q13_COPY_NUMBER_VARIATION_SYNDROME	WP_2Q13_COPY_NUMBER_VARIATION_SYNDROME	1/187	63/13356	0.589505	0.687948	0.541753	GRB2	1
HIV PPIs	WP_LUNG_FIBROSIS	WP_LUNG_FIBROSIS	1/187	63/13356	0.589505	0.687948	0.541753	DSP	1
HIV PPIs	WP_ECTODERM_DIFFERENTIATION	WP_ECTODERM_DIFFERENTIATION	2/187	142/13356	0.594107	0.691311	0.544402	NARS2/SDCBP	2
HIV PPIs	PID_IL4_2PATHWAY	PID_IL4_2PATHWAY	1/187	64/13356	0.59528	0.691311	0.544402	GRB2	1
HIV PPIs	PID_TCR_PATHWAY	PID_TCR_PATHWAY	1/187	64/13356	0.59528	0.691311	0.544402	GRB2	1
HIV PPIs	REACTOME_SEMAPHORIN_INTERACTIONS	REACTOME_SEMAPHORIN_INTERACTIONS	1/187	64/13356	0.59528	0.691311	0.544402	ARHGEF12	1
HIV PPIs	WP_FERROPTOSIS	WP_FERROPTOSIS	1/187	64/13356	0.59528	0.691311	0.544402	ACSL3	1
HIV PPIs	REACTOME_FCGAMMA_RECEPTOR_FCGR_DEPENDENT_PHAGOCYTOSIS	REACTOME_FCGAMMA_RECEPTOR_FCGR_DEPENDENT_PHAGOCYTOSIS	2/187	143/13356	0.59794	0.692382	0.545245	GRB2/AHCYL1	2
HIV PPIs	REACTOME_MITOTIC_PROPHASE	REACTOME_MITOTIC_PROPHASE	2/187	143/13356	0.59794	0.692382	0.545245	PPP2CB/RANBP2	2
HIV PPIs	WP_ENDODERM_DIFFERENTIATION	WP_ENDODERM_DIFFERENTIATION	2/187	143/13356	0.59794	0.692382	0.545245	APP/LRPPRC	2
HIV PPIs	PID_RB_1PATHWAY	PID_RB_1PATHWAY	1/187	65/13356	0.600974	0.694549	0.546951	CDKN2A	1
HIV PPIs	WP_ONCOSTATIN_M_SIGNALING_PATHWAY	WP_ONCOSTATIN_M_SIGNALING_PATHWAY	1/187	65/13356	0.600974	0.694549	0.546951	GRB2	1
HIV PPIs	WP_BRAINDERIVED_NEUROTROPHIC_FACTOR_BDNF_SIGNALING_PATHWAY	WP_BRAINDERIVED_NEUROTROPHIC_FACTOR_BDNF_SIGNALING_PATHWAY	2/187	144/13356	0.601746	0.694769	0.547125	GRB2/SQSTM1	2
HIV PPIs	PID_HIF1_TFPATHWAY	PID_HIF1_TFPATHWAY	1/187	66/13356	0.606588	0.699009	0.550464	MCL1	1
HIV PPIs	WP_PHYSICOCHEMICAL_FEATURES_AND_TOXICITYASSOCIATED_PATHWAYS	WP_PHYSICOCHEMICAL_FEATURES_AND_TOXICITYASSOCIATED_PATHWAYS	1/187	66/13356	0.606588	0.699009	0.550464	GRB2	1
HIV PPIs	KEGG_ADIPOCYTOKINE_SIGNALING_PATHWAY	KEGG_ADIPOCYTOKINE_SIGNALING_PATHWAY	1/187	67/13356	0.612123	0.704709	0.554952	ACSL3	1
HIV PPIs	KEGG_P53_SIGNALING_PATHWAY	KEGG_P53_SIGNALING_PATHWAY	1/187	68/13356	0.617581	0.709625	0.558824	CDKN2A	1
HIV PPIs	REACTOME_NONHOMOLOGOUS_END_JOINING_NHEJ	REACTOME_NONHOMOLOGOUS_END_JOINING_NHEJ	1/187	68/13356	0.617581	0.709625	0.558824	HERC2	1
HIV PPIs	KEGG_LONG_TERM_DEPRESSION	KEGG_LONG_TERM_DEPRESSION	1/187	70/13356	0.62827	0.71914	0.566317	PPP2CB	1
HIV PPIs	KEGG_LONG_TERM_POTENTIATION	KEGG_LONG_TERM_POTENTIATION	1/187	70/13356	0.62827	0.71914	0.566317	PPP1R12A	1
HIV PPIs	KEGG_PANCREATIC_CANCER	KEGG_PANCREATIC_CANCER	1/187	70/13356	0.62827	0.71914	0.566317	CDKN2A	1
HIV PPIs	WP_GLUCOCORTICOID_RECEPTOR_PATHWAY	WP_GLUCOCORTICOID_RECEPTOR_PATHWAY	1/187	70/13356	0.62827	0.71914	0.566317	CUL1	1
HIV PPIs	KEGG_MELANOMA	KEGG_MELANOMA	1/187	71/13356	0.633502	0.721673	0.568311	CDKN2A	1
HIV PPIs	REACTOME_PKMTS_METHYLATE_HISTONE_LYSINES	REACTOME_PKMTS_METHYLATE_HISTONE_LYSINES	1/187	71/13356	0.633502	0.721673	0.568311	RBBP7	1
HIV PPIs	REACTOME_ROLE_OF_LAT2_NTAL_LAB_ON_CALCIUM_MOBILIZATION	REACTOME_ROLE_OF_LAT2_NTAL_LAB_ON_CALCIUM_MOBILIZATION	1/187	71/13356	0.633502	0.721673	0.568311	GRB2	1
HIV PPIs	REACTOME_SUMOYLATION_OF_CHROMATIN_ORGANIZATION_PROTEINS	REACTOME_SUMOYLATION_OF_CHROMATIN_ORGANIZATION_PROTEINS	1/187	71/13356	0.633502	0.721673	0.568311	RANBP2	1
HIV PPIs	WP_PARKINSONS_DISEASE_PATHWAY	WP_PARKINSONS_DISEASE_PATHWAY	1/187	71/13356	0.633502	0.721673	0.568311	UBA1	1
HIV PPIs	WP_BREAST_CANCER_PATHWAY	WP_BREAST_CANCER_PATHWAY	2/187	154/13356	0.638319	0.726468	0.572087	GRB2/SKP1	2
HIV PPIs	KEGG_ADHERENS_JUNCTION	KEGG_ADHERENS_JUNCTION	1/187	73/13356	0.643747	0.729865	0.574763	CTNNA3	1
HIV PPIs	REACTOME_PRC2_METHYLATES_HISTONES_AND_DNA	REACTOME_PRC2_METHYLATES_HISTONES_AND_DNA	1/187	73/13356	0.643747	0.729865	0.574763	RBBP7	1
HIV PPIs	WP_CHROMOSOMAL_AND_MICROSATELLITE_INSTABILITY_IN_COLORECTAL_CANCER	WP_CHROMOSOMAL_AND_MICROSATELLITE_INSTABILITY_IN_COLORECTAL_CANCER	1/187	73/13356	0.643747	0.729865	0.574763	MSH2	1
HIV PPIs	WP_MECP2_AND_ASSOCIATED_RETT_SYNDROME	WP_MECP2_AND_ASSOCIATED_RETT_SYNDROME	1/187	73/13356	0.643747	0.729865	0.574763	FUT8	1
HIV PPIs	REACTOME_RHOG_GTPASE_CYCLE	REACTOME_RHOG_GTPASE_CYCLE	1/187	74/13356	0.648763	0.733469	0.577601	LMAN1	1
HIV PPIs	WP_HEAD_AND_NECK_SQUAMOUS_CELL_CARCINOMA	WP_HEAD_AND_NECK_SQUAMOUS_CELL_CARCINOMA	1/187	74/13356	0.648763	0.733469	0.577601	CDKN2A	1
HIV PPIs	REACTOME_CELLULAR_RESPONSE_TO_STARVATION	REACTOME_CELLULAR_RESPONSE_TO_STARVATION	2/187	157/13356	0.648767	0.733469	0.577601	FNIP1/FLCN	2
HIV PPIs	NABA_ECM_REGULATORS	NABA_ECM_REGULATORS	3/187	238/13356	0.651243	0.735572	0.579257	P4HA2/PLOD1/PLOD2	3
HIV PPIs	REACTOME_EXTRA_NUCLEAR_ESTROGEN_SIGNALING	REACTOME_EXTRA_NUCLEAR_ESTROGEN_SIGNALING	1/187	75/13356	0.653708	0.736963	0.580352	PRMT1	1
HIV PPIs	REACTOME_PLASMA_LIPOPROTEIN_ASSEMBLY_REMODELING_AND_CLEARANCE	REACTOME_PLASMA_LIPOPROTEIN_ASSEMBLY_REMODELING_AND_CLEARANCE	1/187	75/13356	0.653708	0.736963	0.580352	P4HB	1
HIV PPIs	KEGG_VEGF_SIGNALING_PATHWAY	KEGG_VEGF_SIGNALING_PATHWAY	1/187	76/13356	0.658584	0.739415	0.582283	NFAT5	1
HIV PPIs	REACTOME_ECM_PROTEOGLYCANS	REACTOME_ECM_PROTEOGLYCANS	1/187	76/13356	0.658584	0.739415	0.582283	APP	1
HIV PPIs	REACTOME_ERCC6_CSB_AND_EHMT2_G9A_POSITIVELY_REGULATE_RRNA_EXPRESSION	REACTOME_ERCC6_CSB_AND_EHMT2_G9A_POSITIVELY_REGULATE_RRNA_EXPRESSION	1/187	76/13356	0.658584	0.739415	0.582283	RBBP7	1
HIV PPIs	WP_LEPTIN_SIGNALING_PATHWAY	WP_LEPTIN_SIGNALING_PATHWAY	1/187	76/13356	0.658584	0.739415	0.582283	GRB2	1
HIV PPIs	WP_INSULIN_SIGNALING	WP_INSULIN_SIGNALING	2/187	160/13356	0.658976	0.739415	0.582283	FLOT1/GRB2	2
HIV PPIs	REACTOME_SENSORY_PROCESSING_OF_SOUND	REACTOME_SENSORY_PROCESSING_OF_SOUND	1/187	77/13356	0.663391	0.74367	0.585634	ATP2B1	1
HIV PPIs	WP_EGFEGFR_SIGNALING_PATHWAY	WP_EGFEGFR_SIGNALING_PATHWAY	2/187	162/13356	0.66565	0.745503	0.587078	GRB2/NEDD8	2
HIV PPIs	REACTOME_CONSTITUTIVE_SIGNALING_BY_ABERRANT_PI3K_IN_CANCER	REACTOME_CONSTITUTIVE_SIGNALING_BY_ABERRANT_PI3K_IN_CANCER	1/187	78/13356	0.668131	0.746184	0.587614	GRB2	1
HIV PPIs	REACTOME_DNA_DOUBLE_STRAND_BREAK_RESPONSE	REACTOME_DNA_DOUBLE_STRAND_BREAK_RESPONSE	1/187	78/13356	0.668131	0.746184	0.587614	HERC2	1
HIV PPIs	REACTOME_SIGNALING_BY_INSULIN_RECEPTOR	REACTOME_SIGNALING_BY_INSULIN_RECEPTOR	1/187	78/13356	0.668131	0.746184	0.587614	GRB2	1
HIV PPIs	KEGG_FC_EPSILON_RI_SIGNALING_PATHWAY	KEGG_FC_EPSILON_RI_SIGNALING_PATHWAY	1/187	79/13356	0.672805	0.747909	0.588972	GRB2	1
HIV PPIs	PID_MET_PATHWAY	PID_MET_PATHWAY	1/187	79/13356	0.672805	0.747909	0.588972	GRB2	1
HIV PPIs	PID_P73PATHWAY	PID_P73PATHWAY	1/187	79/13356	0.672805	0.747909	0.588972	NEDD4L	1
HIV PPIs	REACTOME_MEIOTIC_SYNAPSIS	REACTOME_MEIOTIC_SYNAPSIS	1/187	79/13356	0.672805	0.747909	0.588972	SUN1	1
HIV PPIs	REACTOME_SIGNALING_BY_MET	REACTOME_SIGNALING_BY_MET	1/187	79/13356	0.672805	0.747909	0.588972	GRB2	1
HIV PPIs	WP_CHEMOKINE_SIGNALING_PATHWAY	WP_CHEMOKINE_SIGNALING_PATHWAY	2/187	165/13356	0.675464	0.750167	0.59075	ARRB2/GRB2	2
HIV PPIs	REACTOME_G_ALPHA_12_13_SIGNALLING_EVENTS	REACTOME_G_ALPHA_12_13_SIGNALLING_EVENTS	1/187	80/13356	0.677414	0.751633	0.591905	ARHGEF12	1
HIV PPIs	REACTOME_SLC_MEDIATED_TRANSMEMBRANE_TRANSPORT	REACTOME_SLC_MEDIATED_TRANSMEMBRANE_TRANSPORT	3/187	249/13356	0.681152	0.75508	0.594619	SLC30A7/AHCYL2/SLC27A4	3
HIV PPIs	BIOCARTA_MAPK_PATHWAY	BIOCARTA_MAPK_PATHWAY	1/187	81/13356	0.681957	0.755273	0.594771	GRB2	1
HIV PPIs	PID_REG_GR_PATHWAY	PID_REG_GR_PATHWAY	1/187	82/13356	0.686438	0.758127	0.597018	FKBP4	1
HIV PPIs	REACTOME_DDX58_IFIH1_MEDIATED_INDUCTION_OF_INTERFERON_ALPHA_BETA	REACTOME_DDX58_IFIH1_MEDIATED_INDUCTION_OF_INTERFERON_ALPHA_BETA	1/187	82/13356	0.686438	0.758127	0.597018	APP	1
HIV PPIs	REACTOME_ROLE_OF_PHOSPHOLIPIDS_IN_PHAGOCYTOSIS	REACTOME_ROLE_OF_PHOSPHOLIPIDS_IN_PHAGOCYTOSIS	1/187	82/13356	0.686438	0.758127	0.597018	AHCYL1	1
HIV PPIs	REACTOME_PI_METABOLISM	REACTOME_PI_METABOLISM	1/187	84/13356	0.69521	0.764988	0.602421	PIP4P1	1
HIV PPIs	REACTOME_TRANSCRIPTIONAL_REGULATION_OF_WHITE_ADIPOCYTE_DIFFERENTIATION	REACTOME_TRANSCRIPTIONAL_REGULATION_OF_WHITE_ADIPOCYTE_DIFFERENTIATION	1/187	84/13356	0.69521	0.764988	0.602421	THRAP3	1
HIV PPIs	REACTOME_TRANSPORT_OF_MATURE_TRANSCRIPT_TO_CYTOPLASM	REACTOME_TRANSPORT_OF_MATURE_TRANSCRIPT_TO_CYTOPLASM	1/187	84/13356	0.69521	0.764988	0.602421	RANBP2	1
HIV PPIs	WP_EGFR_TYROSINE_KINASE_INHIBITOR_RESISTANCE	WP_EGFR_TYROSINE_KINASE_INHIBITOR_RESISTANCE	1/187	84/13356	0.69521	0.764988	0.602421	GRB2	1
HIV PPIs	WP_PI3KAKT_SIGNALING_PATHWAY	WP_PI3KAKT_SIGNALING_PATHWAY	4/187	339/13356	0.702927	0.772767	0.608548	PPP2CB/MCL1/GRB2/PPP2R5E	4
HIV PPIs	REACTOME_TRANSPORT_OF_BILE_SALTS_AND_ORGANIC_ACIDS_METAL_IONS_AND_AMINE_COMPOUNDS	REACTOME_TRANSPORT_OF_BILE_SALTS_AND_ORGANIC_ACIDS_METAL_IONS_AND_AMINE_COMPOUNDS	1/187	86/13356	0.703739	0.772949	0.608691	SLC30A7	1
HIV PPIs	KEGG_APOPTOSIS	KEGG_APOPTOSIS	1/187	87/13356	0.707914	0.774686	0.610059	ENDOD1	1
HIV PPIs	KEGG_ERBB_SIGNALING_PATHWAY	KEGG_ERBB_SIGNALING_PATHWAY	1/187	87/13356	0.707914	0.774686	0.610059	GRB2	1
HIV PPIs	REACTOME_FCERI_MEDIATED_MAPK_ACTIVATION	REACTOME_FCERI_MEDIATED_MAPK_ACTIVATION	1/187	87/13356	0.707914	0.774686	0.610059	GRB2	1
HIV PPIs	REACTOME_PROTEIN_PROTEIN_INTERACTIONS_AT_SYNAPSES	REACTOME_PROTEIN_PROTEIN_INTERACTIONS_AT_SYNAPSES	1/187	87/13356	0.707914	0.774686	0.610059	FLOT1	1
HIV PPIs	REACTOME_RAC2_GTPASE_CYCLE	REACTOME_RAC2_GTPASE_CYCLE	1/187	88/13356	0.71203	0.778478	0.613045	LMAN1	1
HIV PPIs	KEGG_PROSTATE_CANCER	KEGG_PROSTATE_CANCER	1/187	89/13356	0.716089	0.781485	0.615413	GRB2	1
HIV PPIs	WP_PANCREATIC_ADENOCARCINOMA_PATHWAY	WP_PANCREATIC_ADENOCARCINOMA_PATHWAY	1/187	89/13356	0.716089	0.781485	0.615413	CDKN2A	1
HIV PPIs	KEGG_GAP_JUNCTION	KEGG_GAP_JUNCTION	1/187	90/13356	0.720091	0.782992	0.6166	GRB2	1
HIV PPIs	REACTOME_RAB_GEFS_EXCHANGE_GTP_FOR_GDP_ON_RABS	REACTOME_RAB_GEFS_EXCHANGE_GTP_FOR_GDP_ON_RABS	1/187	90/13356	0.720091	0.782992	0.6166	YWHAE	1
HIV PPIs	REACTOME_TRANSCRIPTIONAL_REGULATION_OF_GRANULOPOIESIS	REACTOME_TRANSCRIPTIONAL_REGULATION_OF_GRANULOPOIESIS	1/187	90/13356	0.720091	0.782992	0.6166	CBFB	1
HIV PPIs	WP_TCELL_RECEPTOR_SIGNALING_PATHWAY	WP_TCELL_RECEPTOR_SIGNALING_PATHWAY	1/187	90/13356	0.720091	0.782992	0.6166	GRB2	1
HIV PPIs	KEGG_ENDOCYTOSIS	KEGG_ENDOCYTOSIS	2/187	181/13356	0.723917	0.785139	0.618291	ARRB2/NEDD4L	2
HIV PPIs	REACTOME_PEPTIDE_HORMONE_METABOLISM	REACTOME_PEPTIDE_HORMONE_METABOLISM	1/187	91/13356	0.724036	0.785139	0.618291	SLC30A7	1
HIV PPIs	WP_AMINO_ACID_METABOLISM	WP_AMINO_ACID_METABOLISM	1/187	91/13356	0.724036	0.785139	0.618291	P4HA2	1
HIV PPIs	REACTOME_EPH_EPHRIN_SIGNALING	REACTOME_EPH_EPHRIN_SIGNALING	1/187	92/13356	0.727927	0.786503	0.619365	SDCBP	1
HIV PPIs	REACTOME_FORMATION_OF_THE_BETA_CATENIN_TCF_TRANSACTIVATING_COMPLEX	REACTOME_FORMATION_OF_THE_BETA_CATENIN_TCF_TRANSACTIVATING_COMPLEX	1/187	92/13356	0.727927	0.786503	0.619365	RUVBL1	1
HIV PPIs	WP_CORTICOTROPINRELEASING_HORMONE_SIGNALING_PATHWAY	WP_CORTICOTROPINRELEASING_HORMONE_SIGNALING_PATHWAY	1/187	92/13356	0.727927	0.786503	0.619365	ARRB2	1
HIV PPIs	WP_ERBB_SIGNALING_PATHWAY	WP_ERBB_SIGNALING_PATHWAY	1/187	92/13356	0.727927	0.786503	0.619365	GRB2	1
HIV PPIs	REACTOME_ION_CHANNEL_TRANSPORT	REACTOME_ION_CHANNEL_TRANSPORT	2/187	183/13356	0.729526	0.787519	0.620165	NEDD4L/ATP2B1	2
HIV PPIs	WP_THYROID_HORMONES_PRODUCTION_AND_PERIPHERAL_DOWNSTREAM_SIGNALING_EFFECTS	WP_THYROID_HORMONES_PRODUCTION_AND_PERIPHERAL_DOWNSTREAM_SIGNALING_EFFECTS	1/187	93/13356	0.731763	0.78922	0.621505	GRB2	1
HIV PPIs	WP_VITAMIN_D_RECEPTOR_PATHWAY	WP_VITAMIN_D_RECEPTOR_PATHWAY	2/187	185/13356	0.735039	0.791157	0.62303	CDKN2A/ATP2B1	2
HIV PPIs	REACTOME_HDACS_DEACETYLATE_HISTONES	REACTOME_HDACS_DEACETYLATE_HISTONES	1/187	94/13356	0.735544	0.791157	0.62303	RBBP7	1
HIV PPIs	REACTOME_RAC3_GTPASE_CYCLE	REACTOME_RAC3_GTPASE_CYCLE	1/187	94/13356	0.735544	0.791157	0.62303	LMAN1	1
HIV PPIs	REACTOME_FCGR3A_MEDIATED_IL10_SYNTHESIS	REACTOME_FCGR3A_MEDIATED_IL10_SYNTHESIS	1/187	95/13356	0.739273	0.794235	0.625454	AHCYL1	1
HIV PPIs	WP_IL18_SIGNALING_PATHWAY	WP_IL18_SIGNALING_PATHWAY	3/187	273/13356	0.739736	0.794235	0.625454	UGGT1/TOMM40/MTCH1	3
HIV PPIs	WP_P53_TRANSCRIPTIONAL_GENE_NETWORK	WP_P53_TRANSCRIPTIONAL_GENE_NETWORK	1/187	96/13356	0.74295	0.796256	0.627045	MSH2	1
HIV PPIs	WP_SMALL_CELL_LUNG_CANCER	WP_SMALL_CELL_LUNG_CANCER	1/187	96/13356	0.74295	0.796256	0.627045	SKP1	1
HIV PPIs	KEGG_CHEMOKINE_SIGNALING_PATHWAY	KEGG_CHEMOKINE_SIGNALING_PATHWAY	2/187	189/13356	0.74578	0.797281	0.627852	ARRB2/GRB2	2
HIV PPIs	REACTOME_METABOLISM_OF_VITAMINS_AND_COFACTORS	REACTOME_METABOLISM_OF_VITAMINS_AND_COFACTORS	2/187	189/13356	0.74578	0.797281	0.627852	PARP4/FLAD1	2
HIV PPIs	REACTOME_PROCESSING_OF_DNA_DOUBLE_STRAND_BREAK_ENDS	REACTOME_PROCESSING_OF_DNA_DOUBLE_STRAND_BREAK_ENDS	1/187	97/13356	0.746575	0.797281	0.627852	HERC2	1
HIV PPIs	WP_B_CELL_RECEPTOR_SIGNALING_PATHWAY	WP_B_CELL_RECEPTOR_SIGNALING_PATHWAY	1/187	97/13356	0.746575	0.797281	0.627852	GRB2	1
HIV PPIs	REACTOME_BINDING_AND_UPTAKE_OF_LIGANDS_BY_SCAVENGER_RECEPTORS	REACTOME_BINDING_AND_UPTAKE_OF_LIGANDS_BY_SCAVENGER_RECEPTORS	1/187	98/13356	0.750149	0.799669	0.629732	CALR	1
HIV PPIs	WP_LNCRNA_IN_CANONICAL_WNT_SIGNALING_AND_COLORECTAL_CANCER	WP_LNCRNA_IN_CANONICAL_WNT_SIGNALING_AND_COLORECTAL_CANCER	1/187	98/13356	0.750149	0.799669	0.629732	RUVBL1	1
HIV PPIs	PID_CXCR4_PATHWAY	PID_CXCR4_PATHWAY	1/187	100/13356	0.757148	0.804975	0.633911	ARRB2	1
HIV PPIs	REACTOME_COPI_DEPENDENT_GOLGI_TO_ER_RETROGRADE_TRAFFIC	REACTOME_COPI_DEPENDENT_GOLGI_TO_ER_RETROGRADE_TRAFFIC	1/187	100/13356	0.757148	0.804975	0.633911	TMED9	1
HIV PPIs	REACTOME_VISUAL_PHOTOTRANSDUCTION	REACTOME_VISUAL_PHOTOTRANSDUCTION	1/187	100/13356	0.757148	0.804975	0.633911	NMT1	1
HIV PPIs	KEGG_GNRH_SIGNALING_PATHWAY	KEGG_GNRH_SIGNALING_PATHWAY	1/187	101/13356	0.760574	0.807899	0.636213	GRB2	1
HIV PPIs	WP_INTEGRINMEDIATED_CELL_ADHESION	WP_INTEGRINMEDIATED_CELL_ADHESION	1/187	102/13356	0.763952	0.810766	0.638471	GRB2	1
HIV PPIs	REACTOME_CELLULAR_SENESCENCE	REACTOME_CELLULAR_SENESCENCE	2/187	198/13356	0.768594	0.814246	0.641212	CDKN2A/RBBP7	2
HIV PPIs	WP_FOCAL_ADHESION	WP_FOCAL_ADHESION	2/187	198/13356	0.768594	0.814246	0.641212	PPP1R12A/GRB2	2
HIV PPIs	WP_MICRORNAS_IN_CARDIOMYOCYTE_HYPERTROPHY	WP_MICRORNAS_IN_CARDIOMYOCYTE_HYPERTROPHY	1/187	104/13356	0.770566	0.815367	0.642095	CDK9	1
HIV PPIs	KEGG_FOCAL_ADHESION	KEGG_FOCAL_ADHESION	2/187	199/13356	0.771016	0.815367	0.642095	PPP1R12A/GRB2	2
HIV PPIs	REACTOME_PI3K_AKT_SIGNALING_IN_CANCER	REACTOME_PI3K_AKT_SIGNALING_IN_CANCER	1/187	105/13356	0.773803	0.817591	0.643846	GRB2	1
HIV PPIs	REACTOME_POSITIVE_EPIGENETIC_REGULATION_OF_RRNA_EXPRESSION	REACTOME_POSITIVE_EPIGENETIC_REGULATION_OF_RRNA_EXPRESSION	1/187	106/13356	0.776995	0.81807	0.644223	RBBP7	1
HIV PPIs	REACTOME_SIGNALING_BY_VEGF	REACTOME_SIGNALING_BY_VEGF	1/187	106/13356	0.776995	0.81807	0.644223	AHCYL1	1
HIV PPIs	REACTOME_STIMULI_SENSING_CHANNELS	REACTOME_STIMULI_SENSING_CHANNELS	1/187	106/13356	0.776995	0.81807	0.644223	NEDD4L	1
HIV PPIs	REACTOME_TRANSPORT_OF_INORGANIC_CATIONS_ANIONS_AND_AMINO_ACIDS_OLIGOPEPTIDES	REACTOME_TRANSPORT_OF_INORGANIC_CATIONS_ANIONS_AND_AMINO_ACIDS_OLIGOPEPTIDES	1/187	106/13356	0.776995	0.81807	0.644223	AHCYL2	1
HIV PPIs	REACTOME_TRANSCRIPTIONAL_REGULATION_BY_SMALL_RNAS	REACTOME_TRANSCRIPTIONAL_REGULATION_BY_SMALL_RNAS	1/187	107/13356	0.780143	0.820301	0.645981	RANBP2	1
HIV PPIs	REACTOME_MUSCLE_CONTRACTION	REACTOME_MUSCLE_CONTRACTION	2/187	203/13356	0.780488	0.820301	0.645981	AHCYL1/ATP2B1	2
HIV PPIs	REACTOME_INTERFERON_SIGNALING	REACTOME_INTERFERON_SIGNALING	2/187	204/13356	0.782801	0.82201	0.647326	EIF2AK2/RANBP2	2
HIV PPIs	REACTOME_INTERLEUKIN_4_AND_INTERLEUKIN_13_SIGNALING	REACTOME_INTERLEUKIN_4_AND_INTERLEUKIN_13_SIGNALING	1/187	111/13356	0.792296	0.829793	0.653455	MCL1	1
HIV PPIs	REACTOME_RNA_POLYMERASE_I_TRANSCRIPTION	REACTOME_RNA_POLYMERASE_I_TRANSCRIPTION	1/187	111/13356	0.792296	0.829793	0.653455	RBBP7	1
HIV PPIs	REACTOME_TRNA_PROCESSING	REACTOME_TRNA_PROCESSING	1/187	111/13356	0.792296	0.829793	0.653455	RANBP2	1
HIV PPIs	REACTOME_SENESCENCE_ASSOCIATED_SECRETORY_PHENOTYPE_SASP	REACTOME_SENESCENCE_ASSOCIATED_SECRETORY_PHENOTYPE_SASP	1/187	112/13356	0.795229	0.832135	0.6553	CDKN2A	1
HIV PPIs	REACTOME_TELOMERE_MAINTENANCE	REACTOME_TELOMERE_MAINTENANCE	1/187	113/13356	0.79812	0.83443	0.657107	RUVBL1	1
HIV PPIs	WP_FOCAL_ADHESION_PI3KAKTMTORSIGNALING_PATHWAY	WP_FOCAL_ADHESION_PI3KAKTMTORSIGNALING_PATHWAY	3/187	302/13356	0.798827	0.834439	0.657114	PPP2CB/GRB2/PPP2R5E	3
HIV PPIs	KEGG_REGULATION_OF_ACTIN_CYTOSKELETON	KEGG_REGULATION_OF_ACTIN_CYTOSKELETON	2/187	213/13356	0.802684	0.837735	0.65971	PPP1R12A/ARHGEF12	2
HIV PPIs	KEGG_LEUKOCYTE_TRANSENDOTHELIAL_MIGRATION	KEGG_LEUKOCYTE_TRANSENDOTHELIAL_MIGRATION	1/187	116/13356	0.806552	0.838843	0.660582	CTNNA3	1
HIV PPIs	REACTOME_HCMV_LATE_EVENTS	REACTOME_HCMV_LATE_EVENTS	1/187	116/13356	0.806552	0.838843	0.660582	RANBP2	1
HIV PPIs	REACTOME_PARASITE_INFECTION	REACTOME_PARASITE_INFECTION	1/187	116/13356	0.806552	0.838843	0.660582	GRB2	1
HIV PPIs	WP_EMBRYONIC_STEM_CELL_PLURIPOTENCY_PATHWAYS	WP_EMBRYONIC_STEM_CELL_PLURIPOTENCY_PATHWAYS	1/187	116/13356	0.806552	0.838843	0.660582	GRB2	1
HIV PPIs	REACTOME_LEISHMANIA_INFECTION	REACTOME_LEISHMANIA_INFECTION	3/187	308/13356	0.809556	0.841235	0.662465	APP/GRB2/AHCYL1	3
HIV PPIs	REACTOME_KERATINIZATION	REACTOME_KERATINIZATION	2/187	217/13356	0.810993	0.841995	0.663064	DSC3/DSP	2
HIV PPIs	REACTOME_REGULATION_OF_LIPID_METABOLISM_BY_PPARALPHA	REACTOME_REGULATION_OF_LIPID_METABOLISM_BY_PPARALPHA	1/187	118/13356	0.811979	0.842287	0.663294	THRAP3	1
HIV PPIs	REACTOME_MEIOSIS	REACTOME_MEIOSIS	1/187	119/13356	0.814635	0.844309	0.664886	SUN1	1
HIV PPIs	REACTOME_BIOLOGICAL_OXIDATIONS	REACTOME_BIOLOGICAL_OXIDATIONS	2/187	220/13356	0.817019	0.846047	0.666255	AHCY/COMT	2
HIV PPIs	REACTOME_G_ALPHA_I_SIGNALLING_EVENTS	REACTOME_G_ALPHA_I_SIGNALLING_EVENTS	3/187	314/13356	0.819802	0.847459	0.667367	APP/PPP2CB/AHCYL1	3
HIV PPIs	WP_NUCLEAR_RECEPTORS_METAPATHWAY	WP_NUCLEAR_RECEPTORS_METAPATHWAY	3/187	314/13356	0.819802	0.847459	0.667367	DNAJC7/SQSTM1/CUL1	3
HIV PPIs	REACTOME_ACTIVATION_OF_ANTERIOR_HOX_GENES_IN_HINDBRAIN_DEVELOPMENT_DURING_EARLY_EMBRYOGENESIS	REACTOME_ACTIVATION_OF_ANTERIOR_HOX_GENES_IN_HINDBRAIN_DEVELOPMENT_DURING_EARLY_EMBRYOGENESIS	1/187	122/13356	0.822381	0.848657	0.66831	RBBP7	1
HIV PPIs	REACTOME_RAB_REGULATION_OF_TRAFFICKING	REACTOME_RAB_REGULATION_OF_TRAFFICKING	1/187	122/13356	0.822381	0.848657	0.66831	YWHAE	1
HIV PPIs	REACTOME_SARS_COV_2_ACTIVATES_MODULATES_INNATE_AND_ADAPTIVE_IMMUNE_RESPONSES	REACTOME_SARS_COV_2_ACTIVATES_MODULATES_INNATE_AND_ADAPTIVE_IMMUNE_RESPONSES	1/187	126/13356	0.83221	0.85806	0.675715	RANBP2	1
HIV PPIs	WP_EBOLA_VIRUS_INFECTION_IN_HOST	WP_EBOLA_VIRUS_INFECTION_IN_HOST	1/187	129/13356	0.839226	0.864547	0.680824	EIF2AK2	1
HIV PPIs	REACTOME_CELL_CELL_COMMUNICATION	REACTOME_CELL_CELL_COMMUNICATION	1/187	130/13356	0.841499	0.866142	0.68208	GRB2	1
HIV PPIs	WP_ANGIOPOIETINLIKE_PROTEIN_8_REGULATORY_PATHWAY	WP_ANGIOPOIETINLIKE_PROTEIN_8_REGULATORY_PATHWAY	1/187	132/13356	0.845949	0.869973	0.685097	FLOT1	1
HIV PPIs	KEGG_CELL_ADHESION_MOLECULES_CAMS	KEGG_CELL_ADHESION_MOLECULES_CAMS	1/187	133/13356	0.848127	0.871464	0.686271	CNTNAP1	1
HIV PPIs	REACTOME_DEGRADATION_OF_THE_EXTRACELLULAR_MATRIX	REACTOME_DEGRADATION_OF_THE_EXTRACELLULAR_MATRIX	1/187	140/13356	0.862542	0.884753	0.696736	FBN2	1
HIV PPIs	REACTOME_GENE_SILENCING_BY_RNA	REACTOME_GENE_SILENCING_BY_RNA	1/187	140/13356	0.862542	0.884753	0.696736	RANBP2	1
HIV PPIs	WP_MAPK_SIGNALING_PATHWAY	WP_MAPK_SIGNALING_PATHWAY	2/187	247/13356	0.863989	0.885229	0.69711	ARRB2/GRB2	2
HIV PPIs	WP_NRF2_PATHWAY	WP_NRF2_PATHWAY	1/187	141/13356	0.864487	0.885229	0.69711	SQSTM1	1
HIV PPIs	REACTOME_DISEASES_OF_GLYCOSYLATION	REACTOME_DISEASES_OF_GLYCOSYLATION	1/187	143/13356	0.868295	0.887782	0.699121	MOGS	1
HIV PPIs	REACTOME_DISEASES_OF_METABOLISM	REACTOME_DISEASES_OF_METABOLISM	2/187	250/13356	0.868467	0.887782	0.699121	AHCY/MOGS	2
HIV PPIs	REACTOME_REPRODUCTION	REACTOME_REPRODUCTION	1/187	145/13356	0.871997	0.889869	0.700764	SUN1	1
HIV PPIs	WP_2Q37_COPY_NUMBER_VARIATION_SYNDROME	WP_2Q37_COPY_NUMBER_VARIATION_SYNDROME	1/187	145/13356	0.871997	0.889869	0.700764	NEDD8	1
HIV PPIs	REACTOME_EPIGENETIC_REGULATION_OF_GENE_EXPRESSION	REACTOME_EPIGENETIC_REGULATION_OF_GENE_EXPRESSION	1/187	148/13356	0.877356	0.894574	0.70447	RBBP7	1
HIV PPIs	WP_REGULATION_OF_ACTIN_CYTOSKELETON	WP_REGULATION_OF_ACTIN_CYTOSKELETON	1/187	150/13356	0.880805	0.897325	0.706636	PPP1R12A	1
HIV PPIs	WP_MESODERMAL_COMMITMENT_PATHWAY	WP_MESODERMAL_COMMITMENT_PATHWAY	1/187	153/13356	0.885797	0.901642	0.710036	FOXC1	1
HIV PPIs	KEGG_JAK_STAT_SIGNALING_PATHWAY	KEGG_JAK_STAT_SIGNALING_PATHWAY	1/187	155/13356	0.889009	0.903373	0.711399	GRB2	1
HIV PPIs	REACTOME_CDC42_GTPASE_CYCLE	REACTOME_CDC42_GTPASE_CYCLE	1/187	155/13356	0.889009	0.903373	0.711399	ARHGEF12	1
HIV PPIs	REACTOME_G_ALPHA_S_SIGNALLING_EVENTS	REACTOME_G_ALPHA_S_SIGNALLING_EVENTS	1/187	156/13356	0.890582	0.904201	0.712051	ARRB2	1
HIV PPIs	KEGG_MAPK_SIGNALING_PATHWAY	KEGG_MAPK_SIGNALING_PATHWAY	2/187	267/13356	0.891391	0.904255	0.712093	ARRB2/GRB2	2
HIV PPIs	NABA_ECM_AFFILIATED	NABA_ECM_AFFILIATED	1/187	170/13356	0.910403	0.922757	0.726664	LMAN1	1
HIV PPIs	REACTOME_METABOLISM_OF_CARBOHYDRATES	REACTOME_METABOLISM_OF_CARBOHYDRATES	2/187	293/13356	0.919406	0.930987	0.733144	PPP2CB/RANBP2	2
HIV PPIs	KEGG_CALCIUM_SIGNALING_PATHWAY	KEGG_CALCIUM_SIGNALING_PATHWAY	1/187	178/13356	0.92008	0.930987	0.733144	ATP2B1	1
HIV PPIs	WP_METAPATHWAY_BIOTRANSFORMATION_PHASE_I_AND_II	WP_METAPATHWAY_BIOTRANSFORMATION_PHASE_I_AND_II	1/187	183/13356	0.925592	0.935772	0.736913	COMT	1
HIV PPIs	WP_RAS_SIGNALING	WP_RAS_SIGNALING	1/187	184/13356	0.926649	0.936048	0.73713	GRB2	1
HIV PPIs	REACTOME_CELL_SURFACE_INTERACTIONS_AT_THE_VASCULAR_WALL	REACTOME_CELL_SURFACE_INTERACTIONS_AT_THE_VASCULAR_WALL	1/187	194/13356	0.936424	0.945124	0.744278	GRB2	1
HIV PPIs	NABA_ECM_GLYCOPROTEINS	NABA_ECM_GLYCOPROTEINS	1/187	196/13356	0.938218	0.946136	0.745074	FBN2	1
HIV PPIs	REACTOME_PEPTIDE_LIGAND_BINDING_RECEPTORS	REACTOME_PEPTIDE_LIGAND_BINDING_RECEPTORS	1/187	198/13356	0.939962	0.947095	0.745829	APP	1
HIV PPIs	WP_NETWORK_MAP_OF_SARSCOV2_SIGNALING_PATHWAY	WP_NETWORK_MAP_OF_SARSCOV2_SIGNALING_PATHWAY	1/187	218/13356	0.954917	0.961353	0.757058	LGALS3BP	1
HIV PPIs	REACTOME_ANTI_INFLAMMATORY_RESPONSE_FAVOURING_LEISHMANIA_PARASITE_INFECTION	REACTOME_ANTI_INFLAMMATORY_RESPONSE_FAVOURING_LEISHMANIA_PARASITE_INFECTION	1/187	223/13356	0.958036	0.963681	0.758891	AHCYL1	1
HIV PPIs	REACTOME_TRANSMISSION_ACROSS_CHEMICAL_SYNAPSES	REACTOME_TRANSMISSION_ACROSS_CHEMICAL_SYNAPSES	1/187	270/13356	0.978639	0.983577	0.774559	COMT	1
HIV PPIs	NABA_CORE_MATRISOME	NABA_CORE_MATRISOME	1/187	275/13356	0.980122	0.983793	0.774729	FBN2	1
HIV PPIs	REACTOME_NEURONAL_SYSTEM	REACTOME_NEURONAL_SYSTEM	2/187	411/13356	0.9805	0.983793	0.774729	FLOT1/COMT	2
HIV PPIs	REACTOME_CLASS_A_1_RHODOPSIN_LIKE_RECEPTORS	REACTOME_CLASS_A_1_RHODOPSIN_LIKE_RECEPTORS	1/187	331/13356	0.99114	0.993634	0.782479	APP	1
HIV PPIs	NABA_SECRETED_FACTORS	NABA_SECRETED_FACTORS	1/187	343/13356	0.992552	0.994216	0.782937	ZFP91	1
HIV PPIs	KEGG_OLFACTORY_TRANSDUCTION	KEGG_OLFACTORY_TRANSDUCTION	1/187	389/13356	0.996177	0.997012	0.785138	ARRB2	1
HIV PPIs	REACTOME_GPCR_LIGAND_BINDING	REACTOME_GPCR_LIGAND_BINDING	1/187	463/13356	0.998699	0.998699	0.786467	APP	1
HPV PPIs	REACTOME_MITOCHONDRIAL_TRANSLATION	REACTOME_MITOCHONDRIAL_TRANSLATION	21/282	96/13356	5.88477e-16	7.19708e-13	5.99008e-13	MRPS9/PTCD3/MRPS35/MRPS22/MRPS27/MRPS17/MRPS5/MRPS23/MRPS7/MRPS31/MRPS18B/MRPS16/MRPS28/MRPS26/MRPS25/MRPS10/MRPL10/MRPS15/MRPS14/MRPS12/MRPL14	21
HPV PPIs	REACTOME_TRANSLATION	REACTOME_TRANSLATION	29/282	295/13356	4.8405e-12	2.95997e-09	2.46356e-09	EIF5B/MRPS9/PTCD3/MRPS35/MRPS22/MRPS27/MRPS17/MRPS5/MRPS23/MRPS7/MRPS31/MRPS18B/MRPS16/MRPS28/MRPS26/RPL36AL/MRPS25/MRPS10/MRPL10/MRPS15/MRPS14/EEF1D/EEF1B2/RPN2/DDOST/RPN1/MRPS12/MRPL14/IARS2	29
HPV PPIs	PID_E2F_PATHWAY	PID_E2F_PATHWAY	12/282	73/13356	3.62843e-08	1.47919e-05	1.23112e-05	BRCA1/RB1/E2F1/E2F3/TYMS/TOPBP1/TFDP1/RBL1/SP1/TFDP2/CBX5/RRM2	12
HPV PPIs	REACTOME_MITOTIC_G1_PHASE_AND_G1_S_TRANSITION	REACTOME_MITOTIC_G1_PHASE_AND_G1_S_TRANSITION	16/282	149/13356	1.00565e-07	3.07477e-05	2.55911e-05	RPA1/CCNB1/PSME2/PSME1/PPP2R2A/RB1/E2F1/E2F3/CDC7/TYMS/TFDP1/RBL1/MCM5/PSMA4/TFDP2/RRM2	16
HPV PPIs	KEGG_HUNTINGTONS_DISEASE	KEGG_HUNTINGTONS_DISEASE	17/282	182/13356	3.0624e-07	7.49063e-05	6.2344e-05	POLR2E/HDAC2/ATP5F1B/NDUFA5/ATP5F1D/MT-ATP6/ATP5PD/MT-CO1/NDUFS1/ATP5PO/AP2M1/AP2A1/AP2A2/AP2B1/SP1/SDHB/POLR2H	17
HPV PPIs	REACTOME_FORMATION_OF_ATP_BY_CHEMIOSMOTIC_COUPLING	REACTOME_FORMATION_OF_ATP_BY_CHEMIOSMOTIC_COUPLING	6/282	18/13356	1.25987e-06	0.000256804	0.000213736	ATP5F1B/ATP5MG/ATP5F1D/MT-ATP6/ATP5PD/ATP5PO	6
HPV PPIs	REACTOME_RRNA_PROCESSING	REACTOME_RRNA_PROCESSING	17/282	205/13356	1.63728e-06	0.000286057	0.000238083	PELP1/WDR18/LAS1L/DDX47/LTV1/MTREX/NAT10/UTP18/BYSL/TSR1/EXOSC4/NOP56/RPL36AL/EBNA1BP2/PWP2/FTSJ3/FBL	17
HPV PPIs	WP_7Q1123_COPY_NUMBER_VARIATION_SYNDROME	WP_7Q1123_COPY_NUMBER_VARIATION_SYNDROME	12/282	106/13356	2.33772e-06	0.000357379	0.000297445	SF3B1/SMARCA5/BRD4/HDAC2/CLASP1/ATP5F1B/GTF2I/ATP5F1D/MT-ATP6/ATP5PO/RB1/HDAC3	12
HPV PPIs	REACTOME_NEF_MEDIATES_DOWN_MODULATION_OF_CELL_SURFACE_RECEPTORS_BY_RECRUITING_THEM_TO_CLATHRIN_ADAPTERS	REACTOME_NEF_MEDIATES_DOWN_MODULATION_OF_CELL_SURFACE_RECEPTORS_BY_RECRUITING_THEM_TO_CLATHRIN_ADAPTERS	6/282	21/13356	3.49115e-06	0.000474409	0.000394847	HLA-A/AP2M1/AP1M1/AP2A1/AP2A2/AP2B1	6
HPV PPIs	REACTOME_TRANSCRIPTIONAL_REGULATION_BY_E2F6	REACTOME_TRANSCRIPTIONAL_REGULATION_BY_E2F6	7/282	34/13356	5.7307e-06	0.000700864	0.000583325	BRCA1/E2F1/CDC7/TFDP1/TFDP2/CBX5/RRM2	7
HPV PPIs	WP_CELL_CYCLE	WP_CELL_CYCLE	12/282	120/13356	8.61472e-06	0.0009578	0.000797171	CCNB1/HDAC2/RB1/E2F1/E2F3/CDC7/CDC23/TFDP1/ANAPC1/RBL1/MCM5/TFDP2	12
HPV PPIs	REACTOME_CLATHRIN_MEDIATED_ENDOCYTOSIS	REACTOME_CLATHRIN_MEDIATED_ENDOCYTOSIS	13/282	145/13356	1.20894e-05	0.00101335	0.000843407	COPS2/COPS3/COPS4/LRP2/UBQLN2/UBQLN1/AP2M1/AAK1/AP2A1/AP2A2/AP2B1/CTTN/SNX18	13
HPV PPIs	REACTOME_DISEASES_OF_MITOTIC_CELL_CYCLE	REACTOME_DISEASES_OF_MITOTIC_CELL_CYCLE	7/282	38/13356	1.25067e-05	0.00101335	0.000843407	RB1/E2F1/E2F3/CDC23/TFDP1/ANAPC1/TFDP2	7
HPV PPIs	KEGG_CELL_CYCLE	KEGG_CELL_CYCLE	12/282	125/13356	1.31077e-05	0.00101335	0.000843407	CCNB1/HDAC2/RB1/E2F1/E2F3/CDC7/CDC23/TFDP1/ANAPC1/RBL1/MCM5/TFDP2	12
HPV PPIs	REACTOME_CARGO_RECOGNITION_FOR_CLATHRIN_MEDIATED_ENDOCYTOSIS	REACTOME_CARGO_RECOGNITION_FOR_CLATHRIN_MEDIATED_ENDOCYTOSIS	11/282	105/13356	1.31342e-05	0.00101335	0.000843407	COPS2/COPS3/COPS4/LRP2/UBQLN2/UBQLN1/AP2M1/AAK1/AP2A1/AP2A2/AP2B1	11
HPV PPIs	WP_CILIARY_LANDSCAPE	WP_CILIARY_LANDSCAPE	16/282	215/13356	1.32573e-05	0.00101335	0.000843407	EIF5B/COPS2/COPS3/COPS4/APC/TBC1D4/EXOSC4/HDAC2/NUP88/NDUFA5/RB1/RANBP10/MCM5/CEP170/RANBP9/CTBP2	16
HPV PPIs	WP_RETINOBLASTOMA_GENE_IN_CANCER	WP_RETINOBLASTOMA_GENE_IN_CANCER	10/282	90/13356	1.93826e-05	0.00137764	0.0011466	RPA1/CCNB1/RB1/E2F1/E2F3/CDC7/TYMS/TFDP1/TFDP2/RRM2	10
HPV PPIs	REACTOME_ABERRANT_REGULATION_OF_MITOTIC_G1_S_TRANSITION_IN_CANCER_DUE_TO_RB1_DEFECTS	REACTOME_ABERRANT_REGULATION_OF_MITOTIC_G1_S_TRANSITION_IN_CANCER_DUE_TO_RB1_DEFECTS	5/282	17/13356	2.03511e-05	0.00137764	0.0011466	RB1/E2F1/E2F3/TFDP1/TFDP2	5
HPV PPIs	REACTOME_THE_ROLE_OF_NEF_IN_HIV_1_REPLICATION_AND_DISEASE_PATHOGENESIS	REACTOME_THE_ROLE_OF_NEF_IN_HIV_1_REPLICATION_AND_DISEASE_PATHOGENESIS	6/282	28/13356	2.14024e-05	0.00137764	0.0011466	HLA-A/AP2M1/AP1M1/AP2A1/AP2A2/AP2B1	6
HPV PPIs	REACTOME_G1_S_SPECIFIC_TRANSCRIPTION	REACTOME_G1_S_SPECIFIC_TRANSCRIPTION	6/282	29/13356	2.65108e-05	0.00162114	0.00134926	E2F1/TYMS/TFDP1/RBL1/TFDP2/RRM2	6
HPV PPIs	REACTOME_MITOCHONDRIAL_BIOGENESIS	REACTOME_MITOCHONDRIAL_BIOGENESIS	10/282	94/13356	2.84446e-05	0.00165656	0.00137874	USP46/ATP5F1B/ATP5MG/ATP5F1D/MT-ATP6/ATP5PD/ATP5PO/NCOR1/TBL1XR1/HDAC3	10
HPV PPIs	WP_OXIDATIVE_PHOSPHORYLATION	WP_OXIDATIVE_PHOSPHORYLATION	8/282	60/13356	3.53202e-05	0.00196348	0.00163419	ATP5F1B/NDUFA5/ATP5MG/ATP5F1D/MT-ATP6/ATP5PD/NDUFS1/ATP5PO	8
HPV PPIs	REACTOME_CRISTAE_FORMATION	REACTOME_CRISTAE_FORMATION	6/282	31/13356	3.96593e-05	0.00210884	0.00175517	ATP5F1B/ATP5MG/ATP5F1D/MT-ATP6/ATP5PD/ATP5PO	6
HPV PPIs	WP_PROTEASOME_DEGRADATION	WP_PROTEASOME_DEGRADATION	8/282	62/13356	4.50026e-05	0.00229326	0.00190866	RPN2/HLA-C/PSME2/PSME1/RPN1/HLA-A/HLA-B/PSMA4	8
HPV PPIs	REACTOME_REGULATION_OF_MECP2_EXPRESSION_AND_ACTIVITY	REACTOME_REGULATION_OF_MECP2_EXPRESSION_AND_ACTIVITY	6/282	32/13356	4.79535e-05	0.00234589	0.00195247	HDAC2/PRKACA/NCOR1/TBL1XR1/HDAC3/LBR	6
HPV PPIs	REACTOME_CYCLIN_D_ASSOCIATED_EVENTS_IN_G1	REACTOME_CYCLIN_D_ASSOCIATED_EVENTS_IN_G1	7/282	47/13356	5.2988e-05	0.00249247	0.00207447	PPP2R2A/RB1/E2F1/E2F3/TFDP1/RBL1/TFDP2	7
HPV PPIs	WP_G1_TO_S_CELL_CYCLE_CONTROL	WP_G1_TO_S_CELL_CYCLE_CONTROL	8/282	64/13356	5.68037e-05	0.002573	0.00214149	RPA1/CCNB1/RB1/E2F1/E2F3/TFDP1/MCM5/TFDP2	8
HPV PPIs	WP_ELECTRON_TRANSPORT_CHAIN_OXPHOS_SYSTEM_IN_MITOCHONDRIA	WP_ELECTRON_TRANSPORT_CHAIN_OXPHOS_SYSTEM_IN_MITOCHONDRIA	10/282	103/13356	6.28267e-05	0.00274418	0.00228396	ATP5F1B/NDUFA5/ATP5MG/ATP5F1D/MT-ATP6/ATP5PD/MT-CO1/NDUFS1/ATP5PO/SDHB	10
HPV PPIs	REACTOME_E2F_MEDIATED_REGULATION_OF_DNA_REPLICATION	REACTOME_E2F_MEDIATED_REGULATION_OF_DNA_REPLICATION	5/282	22/13356	7.94187e-05	0.00332033	0.00276348	CCNB1/RB1/E2F1/TFDP1/TFDP2	5
HPV PPIs	REACTOME_ONCOGENE_INDUCED_SENESCENCE	REACTOME_ONCOGENE_INDUCED_SENESCENCE	6/282	35/13356	8.14471e-05	0.00332033	0.00276348	RB1/E2F1/E2F3/TFDP1/SP1/TFDP2	6
HPV PPIs	BIOCARTA_CELLCYCLE_PATHWAY	BIOCARTA_CELLCYCLE_PATHWAY	5/282	23/13356	9.97385e-05	0.00393484	0.00327494	CCNB1/RB1/E2F1/TFDP1/RBL1	5
HPV PPIs	REACTOME_HOST_INTERACTIONS_OF_HIV_FACTORS	REACTOME_HOST_INTERACTIONS_OF_HIV_FACTORS	11/282	131/13356	0.000103073	0.00393931	0.00327866	RANGAP1/NUP88/PSME2/PSME1/HLA-A/AP2M1/AP1M1/AP2A1/AP2A2/AP2B1/PSMA4	11
HPV PPIs	REACTOME_INHIBITION_OF_REPLICATION_INITIATION_OF_DAMAGED_DNA_BY_RB1_E2F1	REACTOME_INHIBITION_OF_REPLICATION_INITIATION_OF_DAMAGED_DNA_BY_RB1_E2F1	4/282	13/13356	0.000119683	0.00418206	0.0034807	RB1/E2F1/TFDP1/TFDP2	4
HPV PPIs	REACTOME_LOSS_OF_FUNCTION_OF_MECP2_IN_RETT_SYNDROME	REACTOME_LOSS_OF_FUNCTION_OF_MECP2_IN_RETT_SYNDROME	4/282	13/13356	0.000119683	0.00418206	0.0034807	PRKACA/NCOR1/TBL1XR1/HDAC3	4
HPV PPIs	REACTOME_WNT5A_DEPENDENT_INTERNALIZATION_OF_FZD2_FZD5_AND_ROR2	REACTOME_WNT5A_DEPENDENT_INTERNALIZATION_OF_FZD2_FZD5_AND_ROR2	4/282	13/13356	0.000119683	0.00418206	0.0034807	AP2M1/AP2A1/AP2A2/AP2B1	4
HPV PPIs	REACTOME_CELL_CYCLE_CHECKPOINTS	REACTOME_CELL_CYCLE_CHECKPOINTS	17/282	291/13356	0.00015251	0.00518112	0.00431221	RANGAP1/RPA1/CCNB1/BLM/CKAP5/NSD2/RCC2/BRCA1/CLASP1/PSME2/PSME1/CDC7/TOPBP1/CDC23/ANAPC1/MCM5/PSMA4	17
HPV PPIs	REACTOME_RETROGRADE_NEUROTROPHIN_SIGNALLING	REACTOME_RETROGRADE_NEUROTROPHIN_SIGNALLING	4/282	14/13356	0.000164781	0.0054467	0.00453325	AP2M1/AP2A1/AP2A2/AP2B1	4
HPV PPIs	REACTOME_CLASS_I_MHC_MEDIATED_ANTIGEN_PROCESSING_PRESENTATION	REACTOME_CLASS_I_MHC_MEDIATED_ANTIGEN_PROCESSING_PRESENTATION	20/282	381/13356	0.000173784	0.0055931	0.0046551	HECTD3/UBE2R2/CUL7/HLA-C/GLMN/PSME2/PSME1/UBE2G2/HLA-A/RNF126/HLA-B/UBE3A/RNF138/UBR1/CDC23/KLHL22/ANAPC1/PSMA4/CUL3/DTX3L	20
HPV PPIs	KEGG_ALZHEIMERS_DISEASE	KEGG_ALZHEIMERS_DISEASE	12/282	166/13356	0.000210417	0.00659845	0.00549184	LRP1/ATP5F1B/NDUFA5/ATP5F1D/MT-ATP6/ATP5PD/MT-CO1/NDUFS1/ATP5PO/SDHB/CDK5/IDE	12
HPV PPIs	REACTOME_WNT5A_DEPENDENT_INTERNALIZATION_OF_FZD4	REACTOME_WNT5A_DEPENDENT_INTERNALIZATION_OF_FZD4	4/282	15/13356	0.000220984	0.00675658	0.00562346	AP2M1/AP2A1/AP2A2/AP2B1	4
HPV PPIs	REACTOME_TRANSCRIPTION_OF_E2F_TARGETS_UNDER_NEGATIVE_CONTROL_BY_P107_RBL1_AND_P130_RBL2_IN_COMPLEX_WITH_HDAC1	REACTOME_TRANSCRIPTION_OF_E2F_TARGETS_UNDER_NEGATIVE_CONTROL_BY_P107_RBL1_AND_P130_RBL2_IN_COMPLEX_WITH_HDAC1	4/282	16/13356	0.000289773	0.00843791	0.00702281	E2F1/TFDP1/RBL1/TFDP2	4
HPV PPIs	REACTOME_VLDLR_INTERNALISATION_AND_DEGRADATION	REACTOME_VLDLR_INTERNALISATION_AND_DEGRADATION	4/282	16/13356	0.000289773	0.00843791	0.00702281	AP2M1/AP2A1/AP2A2/AP2B1	4
HPV PPIs	REACTOME_ANTIGEN_PROCESSING_UBIQUITINATION_PROTEASOME_DEGRADATION	REACTOME_ANTIGEN_PROCESSING_UBIQUITINATION_PROTEASOME_DEGRADATION	17/282	308/13356	0.000298335	0.00848521	0.00706219	HECTD3/UBE2R2/CUL7/GLMN/PSME2/PSME1/UBE2G2/RNF126/UBE3A/RNF138/UBR1/CDC23/KLHL22/ANAPC1/PSMA4/CUL3/DTX3L	17
HPV PPIs	REACTOME_MITOTIC_G2_G2_M_PHASES	REACTOME_MITOTIC_G2_G2_M_PHASES	13/282	200/13356	0.000329569	0.00916052	0.00762424	CCNB1/CKAP5/PRKACA/CLASP1/PPP1CB/PSME2/PSME1/PPP2R2A/E2F1/E2F3/TPX2/PSMA4/TUBA4A	13
HPV PPIs	WP_ATM_SIGNALING_IN_DEVELOPMENT_AND_DISEASE	WP_ATM_SIGNALING_IN_DEVELOPMENT_AND_DISEASE	6/282	45/13356	0.000342479	0.00929627	0.00773722	STK11/CDK5/RNF40/RNF20/HSPB1/LBR	6
HPV PPIs	REACTOME_TRANSCRIPTIONAL_REGULATION_BY_MECP2	REACTOME_TRANSCRIPTIONAL_REGULATION_BY_MECP2	7/282	63/13356	0.000349655	0.00929627	0.00773722	HDAC2/PRKACA/DGCR8/NCOR1/TBL1XR1/HDAC3/LBR	7
HPV PPIs	REACTOME_RESPIRATORY_ELECTRON_TRANSPORT_ATP_SYNTHESIS_BY_CHEMIOSMOTIC_COUPLING_AND_HEAT_PRODUCTION_BY_UNCOUPLING_PROTEINS	REACTOME_RESPIRATORY_ELECTRON_TRANSPORT_ATP_SYNTHESIS_BY_CHEMIOSMOTIC_COUPLING_AND_HEAT_PRODUCTION_BY_UNCOUPLING_PROTEINS	10/282	127/13356	0.000357478	0.00930204	0.00774203	ATP5F1B/NDUFA5/ATP5MG/ATP5F1D/MT-ATP6/ATP5PD/MT-CO1/NDUFS1/ATP5PO/SDHB	10
HPV PPIs	REACTOME_TRAFFICKING_OF_GLUR2_CONTAINING_AMPA_RECEPTORS	REACTOME_TRAFFICKING_OF_GLUR2_CONTAINING_AMPA_RECEPTORS	4/282	17/13356	0.000372672	0.00949537	0.00790293	AP2M1/AP2A1/AP2A2/AP2B1	4
HPV PPIs	KEGG_PARKINSONS_DISEASE	KEGG_PARKINSONS_DISEASE	10/282	130/13356	0.000430887	0.0104516	0.00869878	ATP5F1B/NDUFA5/ATP5F1D/MT-ATP6/ATP5PD/MT-CO1/NDUFS1/UBE2G2/ATP5PO/SDHB	10
HPV PPIs	WP_22Q112_COPY_NUMBER_VARIATION_SYNDROME	WP_22Q112_COPY_NUMBER_VARIATION_SYNDROME	10/282	130/13356	0.000430887	0.0104516	0.00869878	RANGAP1/DGCR8/PPP1CB/UFD1/NCOR1/KLHL22/SLC25A1/HDAC3/CUL3/CBX5	10
HPV PPIs	PID_FANCONI_PATHWAY	PID_FANCONI_PATHWAY	6/282	47/13356	0.000435838	0.0104516	0.00869878	WDR48/USP1/RPA1/BLM/BRCA1/TOPBP1	6
HPV PPIs	REACTOME_TP53_REGULATES_TRANSCRIPTION_OF_GENES_INVOLVED_IN_G2_CELL_CYCLE_ARREST	REACTOME_TP53_REGULATES_TRANSCRIPTION_OF_GENES_INVOLVED_IN_G2_CELL_CYCLE_ARREST	4/282	18/13356	0.000471237	0.0110831	0.00922441	CCNB1/TFDP1/RBL1/TFDP2	4
HPV PPIs	KEGG_OXIDATIVE_PHOSPHORYLATION	KEGG_OXIDATIVE_PHOSPHORYLATION	10/282	132/13356	0.000486472	0.0112256	0.00934297	ATP5F1B/NDUFA5/ATP5MG/ATP5F1D/MT-ATP6/ATP5PD/MT-CO1/NDUFS1/ATP5PO/SDHB	10
HPV PPIs	BIOCARTA_PROTEASOME_PATHWAY	BIOCARTA_PROTEASOME_PATHWAY	4/282	19/13356	0.00058705	0.0125958	0.0104834	RPN2/RPN1/UBE3A/PSMA4	4
HPV PPIs	PID_ARF_3PATHWAY	PID_ARF_3PATHWAY	4/282	19/13356	0.00058705	0.0125958	0.0104834	COPA/AP2M1/AP2A1/PIP5K1A	4
HPV PPIs	REACTOME_LDL_CLEARANCE	REACTOME_LDL_CLEARANCE	4/282	19/13356	0.00058705	0.0125958	0.0104834	AP2M1/AP2A1/AP2A2/AP2B1	4
HPV PPIs	REACTOME_TRANSCRIPTION_OF_E2F_TARGETS_UNDER_NEGATIVE_CONTROL_BY_DREAM_COMPLEX	REACTOME_TRANSCRIPTION_OF_E2F_TARGETS_UNDER_NEGATIVE_CONTROL_BY_DREAM_COMPLEX	4/282	19/13356	0.00058705	0.0125958	0.0104834	E2F1/TFDP1/RBL1/TFDP2	4
HPV PPIs	PID_P53_DOWNSTREAM_PATHWAY	PID_P53_DOWNSTREAM_PATHWAY	10/282	137/13356	0.000651935	0.0137468	0.0114414	CCNB1/APC/HDAC2/DGCR8/CSE1L/RB1/E2F1/E2F3/TFDP1/SP1	10
HPV PPIs	REACTOME_S_PHASE	REACTOME_S_PHASE	11/282	163/13356	0.000687094	0.0142426	0.0118541	RPA1/PSME2/PSME1/RB1/E2F1/CDC23/TFDP1/ANAPC1/MCM5/PSMA4/TFDP2	11
HPV PPIs	REACTOME_TRANSCRIPTIONAL_REGULATION_BY_TP53	REACTOME_TRANSCRIPTIONAL_REGULATION_BY_TP53	18/282	363/13356	0.000716048	0.0144018	0.0119866	RPA1/CCNB1/BLM/POLR2E/CSNK2A1/HDAC2/MTA2/BRCA1/MT-CO1/STK11/E2F1/TPX2/TOPBP1/TFDP1/RBL1/POLR2H/TFDP2/CDK5	18
HPV PPIs	REACTOME_REGULATION_OF_TP53_ACTIVITY_THROUGH_PHOSPHORYLATION	REACTOME_REGULATION_OF_TP53_ACTIVITY_THROUGH_PHOSPHORYLATION	8/282	92/13356	0.000718326	0.0144018	0.0119866	RPA1/BLM/CSNK2A1/BRCA1/STK11/TPX2/TOPBP1/CDK5	8
HPV PPIs	REACTOME_G2_M_CHECKPOINTS	REACTOME_G2_M_CHECKPOINTS	11/282	167/13356	0.000840134	0.0165723	0.013793	RPA1/CCNB1/BLM/NSD2/BRCA1/PSME2/PSME1/CDC7/TOPBP1/MCM5/PSMA4	11
HPV PPIs	BIOCARTA_SKP2E2F_PATHWAY	BIOCARTA_SKP2E2F_PATHWAY	3/282	10/13356	0.00100113	0.019395	0.0161424	RB1/E2F1/TFDP1	3
HPV PPIs	WP_EFFECT_OF_PROGERIN_ON_GENES_INVOLVED_IN_HUTCHINSONGILFORD_PROGERIA_SYNDROME	WP_EFFECT_OF_PROGERIN_ON_GENES_INVOLVED_IN_HUTCHINSONGILFORD_PROGERIA_SYNDROME	5/282	37/13356	0.00101495	0.019395	0.0161424	HDAC2/MTA2/RB1/E2F1/CBX5	5
HPV PPIs	REACTOME_COPI_DEPENDENT_GOLGI_TO_ER_RETROGRADE_TRAFFIC	REACTOME_COPI_DEPENDENT_GOLGI_TO_ER_RETROGRADE_TRAFFIC	8/282	100/13356	0.00124262	0.0228407	0.0190102	SURF4/COPB2/COPA/COPB1/RACGAP1/KIF11/TUBA4A/KIF23	8
HPV PPIs	BIOCARTA_PTDINS_PATHWAY	BIOCARTA_PTDINS_PATHWAY	4/282	23/13356	0.00125494	0.0228407	0.0190102	AP2M1/AP2A1/PFKP/PFKM	4
HPV PPIs	REACTOME_RHOBTB1_GTPASE_CYCLE	REACTOME_RHOBTB1_GTPASE_CYCLE	4/282	23/13356	0.00125494	0.0228407	0.0190102	COPS2/COPS4/CUL3/RNF20	4
HPV PPIs	REACTOME_HIV_INFECTION	REACTOME_HIV_INFECTION	13/282	231/13356	0.00126997	0.0228407	0.0190102	RANGAP1/POLR2E/NUP88/PSME2/PSME1/HLA-A/AP2M1/AP1M1/AP2A1/AP2A2/AP2B1/PSMA4/POLR2H	13
HPV PPIs	REACTOME_ENDOSOMAL_VACUOLAR_PATHWAY	REACTOME_ENDOSOMAL_VACUOLAR_PATHWAY	3/282	11/13356	0.00135514	0.0240194	0.0199912	HLA-C/HLA-A/HLA-B	3
HPV PPIs	REACTOME_MHC_CLASS_II_ANTIGEN_PRESENTATION	REACTOME_MHC_CLASS_II_ANTIGEN_PRESENTATION	9/282	126/13356	0.00140251	0.0245038	0.0203943	AP2M1/AP1M1/AP2A1/AP2A2/AP2B1/RACGAP1/KIF11/TUBA4A/KIF23	9
HPV PPIs	REACTOME_MITOTIC_METAPHASE_AND_ANAPHASE	REACTOME_MITOTIC_METAPHASE_AND_ANAPHASE	13/282	236/13356	0.00153973	0.0265224	0.0220744	RANGAP1/CCNB1/CKAP5/RCC2/CLASP1/PSME2/PSME1/PPP2R2A/CDC23/ANAPC1/PSMA4/TUBA4A/LBR	13
HPV PPIs	KEGG_ENDOCYTOSIS	KEGG_ENDOCYTOSIS	11/282	181/13356	0.00161465	0.0270863	0.0225437	HLA-C/HLA-A/HLA-B/AP2M1/AP2A1/AP2A2/AGAP1/AP2B1/PIP5K1A/PRKCI/GRK6	11
HPV PPIs	REACTOME_RRNA_MODIFICATION_IN_THE_NUCLEUS_AND_CYTOSOL	REACTOME_RRNA_MODIFICATION_IN_THE_NUCLEUS_AND_CYTOSOL	6/282	60/13356	0.00161676	0.0270863	0.0225437	DDX47/NAT10/UTP18/NOP56/PWP2/FBL	6
HPV PPIs	REACTOME_MICRORNA_MIRNA_BIOGENESIS	REACTOME_MICRORNA_MIRNA_BIOGENESIS	4/282	25/13356	0.00173431	0.0286631	0.0238561	POLR2E/DGCR8/DICER1/POLR2H	4
HPV PPIs	BIOCARTA_CARM_ER_PATHWAY	BIOCARTA_CARM_ER_PATHWAY	4/282	26/13356	0.00201599	0.032874	0.0273608	PELP1/HDAC2/BRCA1/HDAC3	4
HPV PPIs	REACTOME_SARS_COV_INFECTIONS	REACTOME_SARS_COV_INFECTIONS	19/282	432/13356	0.00209358	0.0332226	0.0276509	SRPK1/BRD4/HDAC2/MTA2/NUP88/RPN2/DDOST/DAD1/HLA-C/RPN1/HLA-A/HLA-B/AP2M1/RB1/AP2A1/AP2A2/AP2B1/CUL3/TOMM70	19
HPV PPIs	REACTOME_CYCLIN_A_CDK2_ASSOCIATED_EVENTS_AT_S_PHASE_ENTRY	REACTOME_CYCLIN_A_CDK2_ASSOCIATED_EVENTS_AT_S_PHASE_ENTRY	7/282	85/13356	0.00210529	0.0332226	0.0276509	PSME2/PSME1/RB1/E2F1/TFDP1/PSMA4/TFDP2	7
HPV PPIs	REACTOME_REGULATION_OF_TP53_ACTIVITY	REACTOME_REGULATION_OF_TP53_ACTIVITY	10/282	160/13356	0.00211885	0.0332226	0.0276509	RPA1/BLM/CSNK2A1/HDAC2/MTA2/BRCA1/STK11/TPX2/TOPBP1/CDK5	10
HPV PPIs	KEGG_UBIQUITIN_MEDIATED_PROTEOLYSIS	KEGG_UBIQUITIN_MEDIATED_PROTEOLYSIS	9/282	135/13356	0.00225964	0.034802	0.0289654	UBE2R2/BRCA1/BIRC6/CUL7/UBE2G2/UBE3A/CDC23/ANAPC1/CUL3	9
HPV PPIs	BIOCARTA_P27_PATHWAY	BIOCARTA_P27_PATHWAY	3/282	13/13356	0.0022765	0.034802	0.0289654	RB1/E2F1/TFDP1	3
HPV PPIs	REACTOME_G0_AND_EARLY_G1	REACTOME_G0_AND_EARLY_G1	4/282	27/13356	0.00232776	0.0351462	0.029252	E2F1/TFDP1/RBL1/TFDP2	4
HPV PPIs	PID_RB_1PATHWAY	PID_RB_1PATHWAY	6/282	65/13356	0.00244365	0.0364462	0.0303339	UBTF/RB1/E2F1/E2F3/TFDP1/HDAC3	6
HPV PPIs	REACTOME_APC_C_MEDIATED_DEGRADATION_OF_CELL_CYCLE_PROTEINS	REACTOME_APC_C_MEDIATED_DEGRADATION_OF_CELL_CYCLE_PROTEINS	7/282	88/13356	0.00256695	0.0378238	0.0314805	CCNB1/PSME2/PSME1/RB1/CDC23/ANAPC1/PSMA4	7
HPV PPIs	PID_HDAC_CLASSI_PATHWAY	PID_HDAC_CLASSI_PATHWAY	6/282	66/13356	0.00264138	0.0384336	0.031988	RANGAP1/HDAC2/PRKACA/MTA2/NCOR1/HDAC3	6
HPV PPIs	REACTOME_NOTCH_HLH_TRANSCRIPTION_PATHWAY	REACTOME_NOTCH_HLH_TRANSCRIPTION_PATHWAY	4/282	28/13356	0.00267118	0.0384336	0.031988	HDAC2/NCOR1/TBL1XR1/HDAC3	4
HPV PPIs	REACTOME_CELLULAR_RESPONSE_TO_CHEMICAL_STRESS	REACTOME_CELLULAR_RESPONSE_TO_CHEMICAL_STRESS	11/282	194/13356	0.00278277	0.0395736	0.0329368	CSNK2A1/UFD1/PSME2/PSME1/HM13/MT-CO1/NCOR1/PSMA4/TBL1XR1/HDAC3/CUL3	11
HPV PPIs	REACTOME_RNA_POLYMERASE_I_TRANSCRIPTION_INITIATION	REACTOME_RNA_POLYMERASE_I_TRANSCRIPTION_INITIATION	5/282	47/13356	0.00300917	0.0423013	0.0352071	UBTF/POLR2E/HDAC2/MTA2/POLR2H	5
HPV PPIs	REACTOME_PCP_CE_PATHWAY	REACTOME_PCP_CE_PATHWAY	7/282	92/13356	0.00329914	0.0456331	0.0379801	PSME2/PSME1/AP2M1/AP2A1/AP2A2/AP2B1/PSMA4	7
HPV PPIs	REACTOME_M_PHASE	REACTOME_M_PHASE	18/282	417/13356	0.0033208	0.0456331	0.0379801	RANGAP1/CCNB1/CSNK2A1/CKAP5/PRKACA/NUP88/RCC2/CLASP1/PSME2/PSME1/PPP2R2A/RB1/CDC23/ANAPC1/PSMA4/TUBA4A/KIF23/LBR	18
HPV PPIs	REACTOME_SIGNALING_BY_TGF_BETA_RECEPTOR_COMPLEX	REACTOME_SIGNALING_BY_TGF_BETA_RECEPTOR_COMPLEX	7/282	93/13356	0.00350485	0.047627	0.0396396	PPP1CB/UCHL5/NCOR1/TFDP1/RBL1/SP1/TFDP2	7
HPV PPIs	REACTOME_RECYCLING_PATHWAY_OF_L1	REACTOME_RECYCLING_PATHWAY_OF_L1	5/282	49/13356	0.00361515	0.0480579	0.0399983	AP2M1/AP2A1/AP2A2/AP2B1/TUBA4A	5
HPV PPIs	REACTOME_TP53_REGULATES_TRANSCRIPTION_OF_CELL_CYCLE_GENES	REACTOME_TP53_REGULATES_TRANSCRIPTION_OF_CELL_CYCLE_GENES	5/282	49/13356	0.00361515	0.0480579	0.0399983	CCNB1/E2F1/TFDP1/RBL1/TFDP2	5
HPV PPIs	PID_AURORA_A_PATHWAY	PID_AURORA_A_PATHWAY	4/282	31/13356	0.00390658	0.0502921	0.0418578	CKAP5/PRKACA/BRCA1/TPX2	4
HPV PPIs	REACTOME_TRAFFICKING_OF_AMPA_RECEPTORS	REACTOME_TRAFFICKING_OF_AMPA_RECEPTORS	4/282	31/13356	0.00390658	0.0502921	0.0418578	AP2M1/AP2A1/AP2A2/AP2B1	4
HPV PPIs	WP_GABA_RECEPTOR_SIGNALING	WP_GABA_RECEPTOR_SIGNALING	4/282	31/13356	0.00390658	0.0502921	0.0418578	AP2M1/AP2A1/AP2A2/AP2B1	4
HPV PPIs	REACTOME_L1CAM_INTERACTIONS	REACTOME_L1CAM_INTERACTIONS	8/282	121/13356	0.00411528	0.052427	0.0436346	CSNK2A1/AP2M1/AP2A1/AP2A2/AP2B1/RANBP9/TUBA4A/CNTN6	8
HPV PPIs	REACTOME_ORGANELLE_BIOGENESIS_AND_MAINTENANCE	REACTOME_ORGANELLE_BIOGENESIS_AND_MAINTENANCE	14/282	296/13356	0.00418361	0.052748	0.0439018	USP46/CKAP5/PRKACA/CLASP1/ATP5F1B/ATP5MG/ATP5F1D/MT-ATP6/ATP5PD/ATP5PO/NCOR1/TBL1XR1/HDAC3/TUBA4A	14
HPV PPIs	REACTOME_DISEASES_OF_DNA_REPAIR	REACTOME_DISEASES_OF_DNA_REPAIR	5/282	51/13356	0.00430403	0.0531699	0.044253	RPA1/BLM/BRCA1/TOPBP1/MSH3	5
HPV PPIs	REACTOME_TRANSCRIPTIONAL_ACTIVITY_OF_SMAD2_SMAD3_SMAD4_HETEROTRIMER	REACTOME_TRANSCRIPTIONAL_ACTIVITY_OF_SMAD2_SMAD3_SMAD4_HETEROTRIMER	5/282	51/13356	0.00430403	0.0531699	0.044253	NCOR1/TFDP1/RBL1/SP1/TFDP2	5
HPV PPIs	REACTOME_THE_CITRIC_ACID_TCA_CYCLE_AND_RESPIRATORY_ELECTRON_TRANSPORT	REACTOME_THE_CITRIC_ACID_TCA_CYCLE_AND_RESPIRATORY_ELECTRON_TRANSPORT	10/282	178/13356	0.00455872	0.0553444	0.0460628	ATP5F1B/NDUFA5/ATP5MG/ATP5F1D/MT-ATP6/ATP5PD/MT-CO1/NDUFS1/ATP5PO/SDHB	10
HPV PPIs	REACTOME_DEUBIQUITINATION	REACTOME_DEUBIQUITINATION	14/282	299/13356	0.00457055	0.0553444	0.0460628	WDR48/WDR20/USP12/APC/BRCA1/UFD1/UCHL5/PSME2/PSME1/FOXK1/PSMA4/OGT/IDE/TOMM70	14
HPV PPIs	REACTOME_APC_C_CDH1_MEDIATED_DEGRADATION_OF_CDC20_AND_OTHER_APC_C_CDH1_TARGETED_PROTEINS_IN_LATE_MITOSIS_EARLY_G1	REACTOME_APC_C_CDH1_MEDIATED_DEGRADATION_OF_CDC20_AND_OTHER_APC_C_CDH1_TARGETED_PROTEINS_IN_LATE_MITOSIS_EARLY_G1	6/282	74/13356	0.00468299	0.0556114	0.046285	PSME2/PSME1/RB1/CDC23/ANAPC1/PSMA4	6
HPV PPIs	REACTOME_PROTEIN_FOLDING	REACTOME_PROTEIN_FOLDING	7/282	98/13356	0.00468354	0.0556114	0.046285	CSNK2A1/PFDN2/NOP56/AP3M1/HDAC3/TUBA4A/KIFC3	7
HPV PPIs	REACTOME_DNA_REPAIR	REACTOME_DNA_REPAIR	15/282	333/13356	0.00483416	0.0568479	0.0473141	WDR48/USP1/RPA1/BLM/POLR2E/COPS2/SMARCA5/COPS3/COPS4/NSD2/BRCA1/UFD1/TOPBP1/POLR2H/MSH3	15
HPV PPIs	REACTOME_FORMATION_OF_TC_NER_PRE_INCISION_COMPLEX	REACTOME_FORMATION_OF_TC_NER_PRE_INCISION_COMPLEX	5/282	53/13356	0.00508172	0.0586702	0.0488308	POLR2E/COPS2/COPS3/COPS4/POLR2H	5
HPV PPIs	BIOCARTA_ETS_PATHWAY	BIOCARTA_ETS_PATHWAY	3/282	17/13356	0.00508507	0.0586702	0.0488308	HDAC2/E2F1/RBL1	3
HPV PPIs	REACTOME_ASPARAGINE_N_LINKED_GLYCOSYLATION	REACTOME_ASPARAGINE_N_LINKED_GLYCOSYLATION	14/282	305/13356	0.00543151	0.0620816	0.0516701	RPN2/DDOST/DAD1/RNF5/SCFD1/COPB2/SEC23IP/DERL2/COPA/COPB1/RPN1/PPP6R3/PPP6R1/TUBA4A	14
HPV PPIs	REACTOME_TRANSCRIPTIONAL_ACTIVATION_OF_MITOCHONDRIAL_BIOGENESIS	REACTOME_TRANSCRIPTIONAL_ACTIVATION_OF_MITOCHONDRIAL_BIOGENESIS	5/282	55/13356	0.00595405	0.0674241	0.0561166	USP46/ATP5F1B/NCOR1/TBL1XR1/HDAC3	5
HPV PPIs	REACTOME_TRANSCRIPTION_COUPLED_NUCLEOTIDE_EXCISION_REPAIR_TC_NER	REACTOME_TRANSCRIPTION_COUPLED_NUCLEOTIDE_EXCISION_REPAIR_TC_NER	6/282	78/13356	0.00605581	0.0676699	0.0563212	RPA1/POLR2E/COPS2/COPS3/COPS4/POLR2H	6
HPV PPIs	REACTOME_RHOBTB_GTPASE_CYCLE	REACTOME_RHOBTB_GTPASE_CYCLE	4/282	35/13356	0.00608641	0.0676699	0.0563212	COPS2/COPS4/CUL3/RNF20	4
HPV PPIs	REACTOME_SIGNALING_BY_NOTCH	REACTOME_SIGNALING_BY_NOTCH	12/282	247/13356	0.0063134	0.0695611	0.0578953	HDAC2/PSME2/PSME1/NCOR1/E2F1/E2F3/TFDP1/PSMA4/TBL1XR1/HDAC3/PRKCI/TFDP2	12
HPV PPIs	REACTOME_SMAD2_SMAD3_SMAD4_HETEROTRIMER_REGULATES_TRANSCRIPTION	REACTOME_SMAD2_SMAD3_SMAD4_HETEROTRIMER_REGULATES_TRANSCRIPTION	4/282	36/13356	0.00673559	0.0735502	0.0612154	TFDP1/RBL1/SP1/TFDP2	4
HPV PPIs	REACTOME_TRANSLATION_OF_SARSCOV2_STRUCTURAL_PROTEINS	REACTOME_TRANSLATION_OF_SARSCOV2_STRUCTURAL_PROTEINS	5/282	57/13356	0.00692676	0.0749684	0.0623957	SRPK1/RPN2/DDOST/DAD1/RPN1	5
HPV PPIs	REACTOME_INITIATION_OF_NUCLEAR_ENVELOPE_NE_REFORMATION	REACTOME_INITIATION_OF_NUCLEAR_ENVELOPE_NE_REFORMATION	3/282	19/13356	0.00702424	0.0753565	0.0627187	CCNB1/PPP2R2A/LBR	3
HPV PPIs	WP_DNA_IRDAMAGE_AND_CELLULAR_RESPONSE_VIA_ATR	WP_DNA_IRDAMAGE_AND_CELLULAR_RESPONSE_VIA_ATR	6/282	81/13356	0.00726253	0.0763502	0.0635457	USP1/RPA1/BRCA1/E2F1/TOPBP1/SP1	6
HPV PPIs	REACTOME_SEPARATION_OF_SISTER_CHROMATIDS	REACTOME_SEPARATION_OF_SISTER_CHROMATIDS	10/282	191/13356	0.00740773	0.0763502	0.0635457	RANGAP1/CKAP5/RCC2/CLASP1/PSME2/PSME1/CDC23/ANAPC1/PSMA4/TUBA4A	10
HPV PPIs	REACTOME_HDR_THROUGH_SINGLE_STRAND_ANNEALING_SSA	REACTOME_HDR_THROUGH_SINGLE_STRAND_ANNEALING_SSA	4/282	37/13356	0.007429	0.0763502	0.0635457	RPA1/BLM/BRCA1/TOPBP1	4
HPV PPIs	REACTOME_MATURATION_OF_SARSCOV2_SPIKE_PROTEIN	REACTOME_MATURATION_OF_SARSCOV2_SPIKE_PROTEIN	4/282	37/13356	0.007429	0.0763502	0.0635457	RPN2/DDOST/DAD1/RPN1	4
HPV PPIs	REACTOME_PLASMA_LIPOPROTEIN_CLEARANCE	REACTOME_PLASMA_LIPOPROTEIN_CLEARANCE	4/282	37/13356	0.007429	0.0763502	0.0635457	AP2M1/AP2A1/AP2A2/AP2B1	4
HPV PPIs	REACTOME_GOLGI_TO_ER_RETROGRADE_TRANSPORT	REACTOME_GOLGI_TO_ER_RETROGRADE_TRANSPORT	8/282	134/13356	0.00754823	0.0769291	0.0640276	SURF4/COPB2/COPA/COPB1/RACGAP1/KIF11/TUBA4A/KIF23	8
HPV PPIs	REACTOME_REGULATION_OF_HSF1_MEDIATED_HEAT_SHOCK_RESPONSE	REACTOME_REGULATION_OF_HSF1_MEDIATED_HEAT_SHOCK_RESPONSE	6/282	82/13356	0.00770084	0.0778358	0.0647822	RPA1/NUP88/ST13/DNAJB1/BAG5/HSPB1	6
HPV PPIs	REACTOME_ABERRANT_REGULATION_OF_MITOTIC_EXIT_IN_CANCER_DUE_TO_RB1_DEFECTS	REACTOME_ABERRANT_REGULATION_OF_MITOTIC_EXIT_IN_CANCER_DUE_TO_RB1_DEFECTS	3/282	20/13356	0.00813645	0.0809015	0.0673337	RB1/CDC23/ANAPC1	3
HPV PPIs	REACTOME_PHOSPHORYLATION_OF_THE_APC_C	REACTOME_PHOSPHORYLATION_OF_THE_APC_C	3/282	20/13356	0.00813645	0.0809015	0.0673337	CCNB1/CDC23/ANAPC1	3
HPV PPIs	PID_AURORA_B_PATHWAY	PID_AURORA_B_PATHWAY	4/282	39/13356	0.00895327	0.0875988	0.0729079	RACGAP1/CUL3/KIF23/CBX5	4
HPV PPIs	REACTOME_ASSOCIATION_OF_TRIC_CCT_WITH_TARGET_PROTEINS_DURING_BIOSYNTHESIS	REACTOME_ASSOCIATION_OF_TRIC_CCT_WITH_TARGET_PROTEINS_DURING_BIOSYNTHESIS	4/282	39/13356	0.00895327	0.0875988	0.0729079	NOP56/AP3M1/HDAC3/KIFC3	4
HPV PPIs	REACTOME_DEFECTIVE_CFTR_CAUSES_CYSTIC_FIBROSIS	REACTOME_DEFECTIVE_CFTR_CAUSES_CYSTIC_FIBROSIS	5/282	61/13356	0.00919554	0.0892551	0.0742865	RNF5/PSME2/DERL2/PSME1/PSMA4	5
HPV PPIs	REACTOME_RHO_GTPASES_ACTIVATE_PAKS	REACTOME_RHO_GTPASES_ACTIVATE_PAKS	3/282	21/13356	0.00934639	0.090005	0.0749105	FLNA/PPP1CB/CTTN	3
HPV PPIs	REACTOME_FACTORS_INVOLVED_IN_MEGAKARYOCYTE_DEVELOPMENT_AND_PLATELET_PRODUCTION	REACTOME_FACTORS_INVOLVED_IN_MEGAKARYOCYTE_DEVELOPMENT_AND_PLATELET_PRODUCTION	9/282	170/13356	0.0101021	0.0957917	0.0797268	HDAC2/PRKACA/RACGAP1/KIF11/TUBA4A/KIF23/CBX5/CDK5/GATA6	9
HPV PPIs	REACTOME_REGULATION_OF_MRNA_STABILITY_BY_PROTEINS_THAT_BIND_AU_RICH_ELEMENTS	REACTOME_REGULATION_OF_MRNA_STABILITY_BY_PROTEINS_THAT_BIND_AU_RICH_ELEMENTS	6/282	87/13356	0.0101823	0.0957917	0.0797268	ANP32A/EXOSC4/PSME2/PSME1/PSMA4/HSPB1	6
HPV PPIs	REACTOME_REGULATION_OF_PLK1_ACTIVITY_AT_G2_M_TRANSITION	REACTOME_REGULATION_OF_PLK1_ACTIVITY_AT_G2_M_TRANSITION	6/282	87/13356	0.0101823	0.0957917	0.0797268	CCNB1/CKAP5/PRKACA/CLASP1/PPP1CB/TUBA4A	6
HPV PPIs	REACTOME_DISEASES_OF_SIGNAL_TRANSDUCTION_BY_GROWTH_FACTOR_RECEPTORS_AND_SECOND_MESSENGERS	REACTOME_DISEASES_OF_SIGNAL_TRANSDUCTION_BY_GROWTH_FACTOR_RECEPTORS_AND_SECOND_MESSENGERS	17/282	432/13356	0.0103852	0.0969554	0.0806953	WDR48/POLR2E/APC/HDAC2/BIRC6/PPP1CB/PSME2/DERL2/PSME1/NCOR1/KSR1/AP3B1/PSMA4/TBL1XR1/POLR2H/CTBP2/HDAC3	17
HPV PPIs	REACTOME_INTRA_GOLGI_AND_RETROGRADE_GOLGI_TO_ER_TRAFFIC	REACTOME_INTRA_GOLGI_AND_RETROGRADE_GOLGI_TO_ER_TRAFFIC	10/282	203/13356	0.0111098	0.102231	0.0850858	SURF4/ARL1/COPB2/COPA/COPB1/USP6NL/RACGAP1/KIF11/TUBA4A/KIF23	10
HPV PPIs	PID_ERA_GENOMIC_PATHWAY	PID_ERA_GENOMIC_PATHWAY	5/282	64/13356	0.0112011	0.102231	0.0850858	ANP32A/CALCOCO1/BRCA1/DDX54/NCOR1	5
HPV PPIs	REACTOME_CYTOPROTECTION_BY_HMOX1	REACTOME_CYTOPROTECTION_BY_HMOX1	5/282	64/13356	0.0112011	0.102231	0.0850858	HM13/MT-CO1/NCOR1/TBL1XR1/HDAC3	5
HPV PPIs	WP_ANDROGEN_RECEPTOR_SIGNALING_PATHWAY	WP_ANDROGEN_RECEPTOR_SIGNALING_PATHWAY	6/282	91/13356	0.0125404	0.113147	0.0941718	FLNA/BRCA1/UBE3A/NCOR1/RB1/SP1	6
HPV PPIs	REACTOME_HOMOLOGOUS_DNA_PAIRING_AND_STRAND_EXCHANGE	REACTOME_HOMOLOGOUS_DNA_PAIRING_AND_STRAND_EXCHANGE	4/282	43/13356	0.0125822	0.113147	0.0941718	RPA1/BLM/BRCA1/TOPBP1	4
HPV PPIs	REACTOME_NEDDYLATION	REACTOME_NEDDYLATION	11/282	240/13356	0.013143	0.116851	0.0972545	COPS2/COPS3/COPS4/CUL9/CUL7/UFD1/PSME2/PSME1/KLHL22/PSMA4/CUL3	11
HPV PPIs	REACTOME_SWITCHING_OF_ORIGINS_TO_A_POST_REPLICATIVE_STATE	REACTOME_SWITCHING_OF_ORIGINS_TO_A_POST_REPLICATIVE_STATE	6/282	92/13356	0.0131852	0.116851	0.0972545	PSME2/PSME1/CDC23/ANAPC1/MCM5/PSMA4	6
HPV PPIs	PID_TELOMERASE_PATHWAY	PID_TELOMERASE_PATHWAY	5/282	67/13356	0.0134859	0.116942	0.0973302	BLM/HDAC2/UBE3A/E2F1/SP1	5
HPV PPIs	BIOCARTA_VDR_PATHWAY	BIOCARTA_VDR_PATHWAY	3/282	24/13356	0.0135779	0.116942	0.0973302	COPS2/TOP2B/NCOR1	3
HPV PPIs	REACTOME_APC_C_CDC20_MEDIATED_DEGRADATION_OF_CYCLIN_B	REACTOME_APC_C_CDC20_MEDIATED_DEGRADATION_OF_CYCLIN_B	3/282	24/13356	0.0135779	0.116942	0.0973302	CCNB1/CDC23/ANAPC1	3
HPV PPIs	REACTOME_GLUTAMATE_NEUROTRANSMITTER_RELEASE_CYCLE	REACTOME_GLUTAMATE_NEUROTRANSMITTER_RELEASE_CYCLE	3/282	24/13356	0.0135779	0.116942	0.0973302	PPFIA1/PPFIA2/ARL6IP5	3
HPV PPIs	REACTOME_MAPK6_MAPK4_SIGNALING	REACTOME_MAPK6_MAPK4_SIGNALING	6/282	93/13356	0.0138528	0.118475	0.0986061	PRKACA/DNAJB1/PSME2/PSME1/PSMA4/HSPB1	6
HPV PPIs	REACTOME_SYNTHESIS_OF_DNA	REACTOME_SYNTHESIS_OF_DNA	7/282	121/13356	0.01424	0.119891	0.0997843	RPA1/PSME2/PSME1/CDC23/ANAPC1/MCM5/PSMA4	7
HPV PPIs	REACTOME_REGULATION_OF_RAS_BY_GAPS	REACTOME_REGULATION_OF_RAS_BY_GAPS	5/282	68/13356	0.0143124	0.119891	0.0997843	PSME2/PSME1/PSMA4/CUL3/RASAL2	5
HPV PPIs	WP_DNA_DAMAGE_RESPONSE	WP_DNA_DAMAGE_RESPONSE	5/282	68/13356	0.0143124	0.119891	0.0997843	CCNB1/BRCA1/RB1/E2F1/CDK5	5
HPV PPIs	REACTOME_G2_M_DNA_DAMAGE_CHECKPOINT	REACTOME_G2_M_DNA_DAMAGE_CHECKPOINT	6/282	94/13356	0.0145436	0.120999	0.100707	RPA1/CCNB1/BLM/NSD2/BRCA1/TOPBP1	6
HPV PPIs	REACTOME_SIGNALING_BY_TGFB_FAMILY_MEMBERS	REACTOME_SIGNALING_BY_TGFB_FAMILY_MEMBERS	7/282	122/13356	0.0148435	0.12266	0.102089	PPP1CB/UCHL5/NCOR1/TFDP1/RBL1/SP1/TFDP2	7
HPV PPIs	KEGG_GLYCOSYLPHOSPHATIDYLINOSITOL_GPI_ANCHOR_BIOSYNTHESIS	KEGG_GLYCOSYLPHOSPHATIDYLINOSITOL_GPI_ANCHOR_BIOSYNTHESIS	3/282	25/13356	0.0151929	0.124705	0.103791	PIGS/PIGK/PIGU	3
HPV PPIs	KEGG_N_GLYCAN_BIOSYNTHESIS	KEGG_N_GLYCAN_BIOSYNTHESIS	4/282	46/13356	0.0158423	0.128313	0.106794	RPN2/DDOST/DAD1/RPN1	4
HPV PPIs	PID_PLK1_PATHWAY	PID_PLK1_PATHWAY	4/282	46/13356	0.0158423	0.128313	0.106794	CCNB1/PPP1CB/TPX2/PRC1	4
HPV PPIs	REACTOME_CIRCADIAN_CLOCK	REACTOME_CIRCADIAN_CLOCK	5/282	70/13356	0.0160659	0.129267	0.107588	USP46/PPP1CB/NCOR1/TBL1XR1/HDAC3	5
HPV PPIs	REACTOME_POTENTIAL_THERAPEUTICS_FOR_SARS	REACTOME_POTENTIAL_THERAPEUTICS_FOR_SARS	8/282	154/13356	0.0165335	0.13216	0.109996	BRD4/HDAC2/MTA2/AP2M1/AP2A1/AP2A2/AP2B1/CUL3	8
HPV PPIs	BIOCARTA_RACCYCD_PATHWAY	BIOCARTA_RACCYCD_PATHWAY	3/282	26/13356	0.0169117	0.133905	0.111448	RB1/E2F1/TFDP1	3
HPV PPIs	PID_LKB1_PATHWAY	PID_LKB1_PATHWAY	4/282	47/13356	0.0170361	0.133905	0.111448	PRKACA/STK11/STRADA/CAB39	4
HPV PPIs	REACTOME_ER_TO_GOLGI_ANTEROGRADE_TRANSPORT	REACTOME_ER_TO_GOLGI_ANTEROGRADE_TRANSPORT	8/282	155/13356	0.0171259	0.133905	0.111448	SCFD1/COPB2/SEC23IP/COPA/COPB1/PPP6R3/PPP6R1/TUBA4A	8
HPV PPIs	BIOCARTA_RANMS_PATHWAY	BIOCARTA_RANMS_PATHWAY	2/282	10/13356	0.0178746	0.133905	0.111448	RANGAP1/TPX2	2
HPV PPIs	REACTOME_NEF_MEDIATED_DOWNREGULATION_OF_MHC_CLASS_I_COMPLEX_CELL_SURFACE_EXPRESSION	REACTOME_NEF_MEDIATED_DOWNREGULATION_OF_MHC_CLASS_I_COMPLEX_CELL_SURFACE_EXPRESSION	2/282	10/13356	0.0178746	0.133905	0.111448	HLA-A/AP1M1	2
HPV PPIs	REACTOME_NEGATIVE_REGULATION_OF_ACTIVITY_OF_TFAP2_AP_2_FAMILY_TRANSCRIPTION_FACTORS	REACTOME_NEGATIVE_REGULATION_OF_ACTIVITY_OF_TFAP2_AP_2_FAMILY_TRANSCRIPTION_FACTORS	2/282	10/13356	0.0178746	0.133905	0.111448	KCTD1/KCTD15	2
HPV PPIs	REACTOME_STAT3_NUCLEAR_EVENTS_DOWNSTREAM_OF_ALK_SIGNALING	REACTOME_STAT3_NUCLEAR_EVENTS_DOWNSTREAM_OF_ALK_SIGNALING	2/282	10/13356	0.0178746	0.133905	0.111448	HDAC2/HDAC3	2
HPV PPIs	REACTOME_AURKA_ACTIVATION_BY_TPX2	REACTOME_AURKA_ACTIVATION_BY_TPX2	5/282	72/13356	0.017957	0.133905	0.111448	CKAP5/PRKACA/CLASP1/TPX2/TUBA4A	5
HPV PPIs	PID_HES_HEY_PATHWAY	PID_HES_HEY_PATHWAY	4/282	48/13356	0.0182847	0.133905	0.111448	NCOR1/RB1/E2F1/GATA6	4
HPV PPIs	REACTOME_DNA_DAMAGE_BYPASS	REACTOME_DNA_DAMAGE_BYPASS	4/282	48/13356	0.0182847	0.133905	0.111448	WDR48/USP1/RPA1/UFD1	4
HPV PPIs	REACTOME_HEME_SIGNALING	REACTOME_HEME_SIGNALING	4/282	48/13356	0.0182847	0.133905	0.111448	USP46/NCOR1/TBL1XR1/HDAC3	4
HPV PPIs	REACTOME_METABOLISM_OF_FAT_SOLUBLE_VITAMINS	REACTOME_METABOLISM_OF_FAT_SOLUBLE_VITAMINS	4/282	48/13356	0.0182847	0.133905	0.111448	LRP1/LRP2/VKORC1L1/RDH11	4
HPV PPIs	REACTOME_NOTCH1_INTRACELLULAR_DOMAIN_REGULATES_TRANSCRIPTION	REACTOME_NOTCH1_INTRACELLULAR_DOMAIN_REGULATES_TRANSCRIPTION	4/282	48/13356	0.0182847	0.133905	0.111448	HDAC2/NCOR1/TBL1XR1/HDAC3	4
HPV PPIs	WP_INTEGRATED_CANCER_PATHWAY	WP_INTEGRATED_CANCER_PATHWAY	4/282	48/13356	0.0182847	0.133905	0.111448	BLM/BRCA1/RB1/E2F1	4
HPV PPIs	KEGG_CHRONIC_MYELOID_LEUKEMIA	KEGG_CHRONIC_MYELOID_LEUKEMIA	5/282	73/13356	0.0189554	0.137174	0.114169	HDAC2/RB1/E2F1/E2F3/CTBP2	5
HPV PPIs	WP_MECP2_AND_ASSOCIATED_RETT_SYNDROME	WP_MECP2_AND_ASSOCIATED_RETT_SYNDROME	5/282	73/13356	0.0189554	0.137174	0.114169	UBE3A/NCOR1/E2F1/CNP/SP1	5
HPV PPIs	REACTOME_MRNA_SPLICING	REACTOME_MRNA_SPLICING	9/282	190/13356	0.0196262	0.141193	0.117514	SF3B1/MTREX/POLR2E/SRSF5/U2SURP/CHERP/PUF60/U2AF2/POLR2H	9
HPV PPIs	REACTOME_CELLULAR_RESPONSE_TO_HEAT_STRESS	REACTOME_CELLULAR_RESPONSE_TO_HEAT_STRESS	6/282	101/13356	0.0200614	0.14348	0.119418	RPA1/NUP88/ST13/DNAJB1/BAG5/HSPB1	6
HPV PPIs	REACTOME_DNA_REPLICATION_PRE_INITIATION	REACTOME_DNA_REPLICATION_PRE_INITIATION	8/282	160/13356	0.020319	0.144477	0.120247	RPA1/PSME2/PSME1/CDC7/CDC23/ANAPC1/MCM5/PSMA4	8
HPV PPIs	BIOCARTA_G1_PATHWAY	BIOCARTA_G1_PATHWAY	3/282	28/13356	0.0206623	0.1447	0.120432	RB1/E2F1/TFDP1	3
HPV PPIs	REACTOME_RNA_POLYMERASE_III_TRANSCRIPTION_INITIATION_FROM_TYPE_3_PROMOTER	REACTOME_RNA_POLYMERASE_III_TRANSCRIPTION_INITIATION_FROM_TYPE_3_PROMOTER	3/282	28/13356	0.0206623	0.1447	0.120432	POLR2E/ZNF143/POLR2H	3
HPV PPIs	WP_TRANSLATION_FACTORS	WP_TRANSLATION_FACTORS	4/282	50/13356	0.0209486	0.1447	0.120432	EIF5B/EEF1D/EIF5A/EEF1B2	4
HPV PPIs	REACTOME_KEAP1_NFE2L2_PATHWAY	REACTOME_KEAP1_NFE2L2_PATHWAY	6/282	102/13356	0.0209513	0.1447	0.120432	CSNK2A1/UFD1/PSME2/PSME1/PSMA4/CUL3	6
HPV PPIs	REACTOME_UCH_PROTEINASES	REACTOME_UCH_PROTEINASES	6/282	102/13356	0.0209513	0.1447	0.120432	UCHL5/PSME2/PSME1/FOXK1/PSMA4/OGT	6
HPV PPIs	REACTOME_PLASMA_LIPOPROTEIN_ASSEMBLY_REMODELING_AND_CLEARANCE	REACTOME_PLASMA_LIPOPROTEIN_ASSEMBLY_REMODELING_AND_CLEARANCE	5/282	75/13356	0.0210601	0.1447	0.120432	PRKACA/AP2M1/AP2A1/AP2A2/AP2B1	5
HPV PPIs	REACTOME_CONDENSATION_OF_PROMETAPHASE_CHROMOSOMES	REACTOME_CONDENSATION_OF_PROMETAPHASE_CHROMOSOMES	2/282	11/13356	0.0215456	0.146391	0.12184	CCNB1/CSNK2A1	2
HPV PPIs	REACTOME_MET_ACTIVATES_RAS_SIGNALING	REACTOME_MET_ACTIVATES_RAS_SIGNALING	2/282	11/13356	0.0215456	0.146391	0.12184	RANBP10/RANBP9	2
HPV PPIs	WP_EGFEGFR_SIGNALING_PATHWAY	WP_EGFEGFR_SIGNALING_PATHWAY	8/282	162/13356	0.0217076	0.146676	0.122078	MAP3K4/AP2M1/E2F1/AP2A1/USP6NL/AP2B1/SP1/PRKCI	8
HPV PPIs	REACTOME_NUCLEAR_ENVELOPE_NE_REASSEMBLY	REACTOME_NUCLEAR_ENVELOPE_NE_REASSEMBLY	5/282	76/13356	0.0221674	0.148655	0.123725	RANGAP1/CCNB1/PPP2R2A/TUBA4A/LBR	5
HPV PPIs	REACTOME_EPH_EPHRIN_MEDIATED_REPULSION_OF_CELLS	REACTOME_EPH_EPHRIN_MEDIATED_REPULSION_OF_CELLS	4/282	51/13356	0.0223652	0.148655	0.123725	AP2M1/AP2A1/AP2A2/AP2B1	4
HPV PPIs	WP_SYNAPTIC_VESICLE_PATHWAY	WP_SYNAPTIC_VESICLE_PATHWAY	4/282	51/13356	0.0223652	0.148655	0.123725	AP2M1/AP2A1/AP2A2/AP2B1	4
HPV PPIs	REACTOME_ANTIGEN_PRESENTATION_FOLDING_ASSEMBLY_AND_PEPTIDE_LOADING_OF_CLASS_I_MHC	REACTOME_ANTIGEN_PRESENTATION_FOLDING_ASSEMBLY_AND_PEPTIDE_LOADING_OF_CLASS_I_MHC	3/282	29/13356	0.0226947	0.149224	0.124198	HLA-C/HLA-A/HLA-B	3
HPV PPIs	REACTOME_ENERGY_DEPENDENT_REGULATION_OF_MTOR_BY_LKB1_AMPK	REACTOME_ENERGY_DEPENDENT_REGULATION_OF_MTOR_BY_LKB1_AMPK	3/282	29/13356	0.0226947	0.149224	0.124198	STK11/STRADA/CAB39	3
HPV PPIs	REACTOME_ABC_TRANSPORTER_DISORDERS	REACTOME_ABC_TRANSPORTER_DISORDERS	5/282	78/13356	0.0244937	0.158826	0.13219	RNF5/PSME2/DERL2/PSME1/PSMA4	5
HPV PPIs	REACTOME_ANTIGEN_PROCESSING_CROSS_PRESENTATION	REACTOME_ANTIGEN_PROCESSING_CROSS_PRESENTATION	6/282	106/13356	0.0247775	0.158826	0.13219	HLA-C/PSME2/PSME1/HLA-A/HLA-B/PSMA4	6
HPV PPIs	REACTOME_POSITIVE_EPIGENETIC_REGULATION_OF_RRNA_EXPRESSION	REACTOME_POSITIVE_EPIGENETIC_REGULATION_OF_RRNA_EXPRESSION	6/282	106/13356	0.0247775	0.158826	0.13219	SF3B1/POLR2E/SMARCA5/HDAC2/MTA2/POLR2H	6
HPV PPIs	REACTOME_ACTIVATION_OF_BH3_ONLY_PROTEINS	REACTOME_ACTIVATION_OF_BH3_ONLY_PROTEINS	3/282	30/13356	0.024832	0.158826	0.13219	E2F1/TFDP1/TFDP2	3
HPV PPIs	REACTOME_RECOGNITION_OF_DNA_DAMAGE_BY_PCNA_CONTAINING_REPLICATION_COMPLEX	REACTOME_RECOGNITION_OF_DNA_DAMAGE_BY_PCNA_CONTAINING_REPLICATION_COMPLEX	3/282	30/13356	0.024832	0.158826	0.13219	WDR48/USP1/RPA1	3
HPV PPIs	REACTOME_RHOD_GTPASE_CYCLE	REACTOME_RHOD_GTPASE_CYCLE	4/282	53/13356	0.02537	0.158826	0.13219	ESYT1/ARHGAP35/RACGAP1/LBR	4
HPV PPIs	REACTOME_SYNTHESIS_OF_PIPS_AT_THE_PLASMA_MEMBRANE	REACTOME_SYNTHESIS_OF_PIPS_AT_THE_PLASMA_MEMBRANE	4/282	53/13356	0.02537	0.158826	0.13219	MTMR3/PLEKHA5/PIP5K1A/MTMR14	4
HPV PPIs	BIOCARTA_BARRESTIN_PATHWAY	BIOCARTA_BARRESTIN_PATHWAY	2/282	12/13356	0.025499	0.158826	0.13219	AP2M1/AP2A1	2
HPV PPIs	WP_PTDINS45P2_IN_CYTOKINESIS_PATHWAY	WP_PTDINS45P2_IN_CYTOKINESIS_PATHWAY	2/282	12/13356	0.025499	0.158826	0.13219	RACGAP1/KIF23	2
HPV PPIs	PID_MYC_ACTIV_PATHWAY	PID_MYC_ACTIV_PATHWAY	5/282	79/13356	0.0257135	0.158826	0.13219	CCNB1/UBTF/DDX18/E2F3/PFKM	5
HPV PPIs	REACTOME_PROTEIN_UBIQUITINATION	REACTOME_PROTEIN_UBIQUITINATION	5/282	79/13356	0.0257135	0.158826	0.13219	UBE2R2/UBE2G2/HLA-A/RNF40/RNF20	5
HPV PPIs	REACTOME_THE_ROLE_OF_GTSE1_IN_G2_M_PROGRESSION_AFTER_G2_CHECKPOINT	REACTOME_THE_ROLE_OF_GTSE1_IN_G2_M_PROGRESSION_AFTER_G2_CHECKPOINT	5/282	79/13356	0.0257135	0.158826	0.13219	CCNB1/PSME2/PSME1/PSMA4/TUBA4A	5
HPV PPIs	REACTOME_HSF1_ACTIVATION	REACTOME_HSF1_ACTIVATION	3/282	31/13356	0.027074	0.164734	0.137107	RPA1/DNAJB1/HSPB1	3
HPV PPIs	REACTOME_RNA_POLYMERASE_I_TRANSCRIPTION_TERMINATION	REACTOME_RNA_POLYMERASE_I_TRANSCRIPTION_TERMINATION	3/282	31/13356	0.027074	0.164734	0.137107	UBTF/POLR2E/POLR2H	3
HPV PPIs	WP_ETHANOL_EFFECTS_ON_HISTONE_MODIFICATIONS	WP_ETHANOL_EFFECTS_ON_HISTONE_MODIFICATIONS	3/282	31/13356	0.027074	0.164734	0.137107	HDAC2/TYMS/HDAC3	3
HPV PPIs	REACTOME_PTEN_REGULATION	REACTOME_PTEN_REGULATION	7/282	139/13356	0.0280686	0.16994	0.14144	CSNK2A1/HDAC2/MTA2/PSME2/PSME1/PSMA4/HDAC3	7
HPV PPIs	REACTOME_AUF1_HNRNP_D0_BINDS_AND_DESTABILIZES_MRNA	REACTOME_AUF1_HNRNP_D0_BINDS_AND_DESTABILIZES_MRNA	4/282	55/13356	0.0286066	0.171499	0.142738	PSME2/PSME1/PSMA4/HSPB1	4
HPV PPIs	WP_DNA_IRDOUBLE_STRAND_BREAKS_AND_CELLULAR_RESPONSE_VIA_ATM	WP_DNA_IRDOUBLE_STRAND_BREAKS_AND_CELLULAR_RESPONSE_VIA_ATM	4/282	55/13356	0.0286066	0.171499	0.142738	BLM/BRCA1/E2F1/CDK5	4
HPV PPIs	REACTOME_NUCLEOTIDE_EXCISION_REPAIR	REACTOME_NUCLEOTIDE_EXCISION_REPAIR	6/282	110/13356	0.0290446	0.173276	0.144216	RPA1/POLR2E/COPS2/COPS3/COPS4/POLR2H	6
HPV PPIs	WP_INITIATION_OF_TRANSCRIPTION_AND_TRANSLATION_ELONGATION_AT_THE_HIV1_LTR	WP_INITIATION_OF_TRANSCRIPTION_AND_TRANSLATION_ELONGATION_AT_THE_HIV1_LTR	3/282	32/13356	0.0294205	0.174666	0.145374	HDAC2/SP1/HDAC3	3
HPV PPIs	PID_SMAD2_3NUCLEAR_PATHWAY	PID_SMAD2_3NUCLEAR_PATHWAY	5/282	82/13356	0.0296037	0.174905	0.145572	HDAC2/NCOR1/TFDP1/RBL1/SP1	5
HPV PPIs	REACTOME_MITOTIC_SPINDLE_CHECKPOINT	REACTOME_MITOTIC_SPINDLE_CHECKPOINT	6/282	111/13356	0.0301822	0.177466	0.147704	RANGAP1/CKAP5/RCC2/CLASP1/CDC23/ANAPC1	6
HPV PPIs	REACTOME_ACTIVATION_OF_THE_PRE_REPLICATIVE_COMPLEX	REACTOME_ACTIVATION_OF_THE_PRE_REPLICATIVE_COMPLEX	3/282	33/13356	0.031871	0.185929	0.154747	RPA1/CDC7/MCM5	3
HPV PPIs	REACTOME_DEGRADATION_OF_DVL	REACTOME_DEGRADATION_OF_DVL	4/282	57/13356	0.0320777	0.185929	0.154747	PSME2/PSME1/PSMA4/CUL3	4
HPV PPIs	WP_OVERLAP_BETWEEN_SIGNAL_TRANSDUCTION_PATHWAYS_CONTRIBUTING_TO_LMNA_LAMINOPATHIES	WP_OVERLAP_BETWEEN_SIGNAL_TRANSDUCTION_PATHWAYS_CONTRIBUTING_TO_LMNA_LAMINOPATHIES	4/282	57/13356	0.0320777	0.185929	0.154747	APC/DICER1/RB1/E2F1	4
HPV PPIs	REACTOME_PI_METABOLISM	REACTOME_PI_METABOLISM	5/282	84/13356	0.0323927	0.186869	0.15553	VAC14/MTMR3/PLEKHA5/PIP5K1A/MTMR14	5
HPV PPIs	REACTOME_DEGRADATION_OF_BETA_CATENIN_BY_THE_DESTRUCTION_COMPLEX	REACTOME_DEGRADATION_OF_BETA_CATENIN_BY_THE_DESTRUCTION_COMPLEX	5/282	85/13356	0.0338466	0.193747	0.161254	APC/PSME2/PSME1/PSMA4/CTBP2	5
HPV PPIs	REACTOME_SIGNALING_BY_NOTCH1_PEST_DOMAIN_MUTANTS_IN_CANCER	REACTOME_SIGNALING_BY_NOTCH1_PEST_DOMAIN_MUTANTS_IN_CANCER	4/282	58/13356	0.0339018	0.193747	0.161254	HDAC2/NCOR1/TBL1XR1/HDAC3	4
HPV PPIs	REACTOME_PROCESSING_OF_CAPPED_INTRON_CONTAINING_PRE_MRNA	REACTOME_PROCESSING_OF_CAPPED_INTRON_CONTAINING_PRE_MRNA	10/282	244/13356	0.0346082	0.196864	0.163849	SF3B1/MTREX/POLR2E/SRSF5/U2SURP/CHERP/PUF60/U2AF2/NUP88/POLR2H	10
HPV PPIs	REACTOME_BETA_CATENIN_INDEPENDENT_WNT_SIGNALING	REACTOME_BETA_CATENIN_INDEPENDENT_WNT_SIGNALING	7/282	146/13356	0.0353041	0.199893	0.16637	PSME2/PSME1/AP2M1/AP2A1/AP2A2/AP2B1/PSMA4	7
HPV PPIs	REACTOME_EPIGENETIC_REGULATION_OF_GENE_EXPRESSION	REACTOME_EPIGENETIC_REGULATION_OF_GENE_EXPRESSION	7/282	148/13356	0.0375786	0.211657	0.176161	UBTF/SF3B1/POLR2E/SMARCA5/HDAC2/MTA2/POLR2H	7
HPV PPIs	REACTOME_DEGRADATION_OF_GLI1_BY_THE_PROTEASOME	REACTOME_DEGRADATION_OF_GLI1_BY_THE_PROTEASOME	4/282	60/13356	0.0377279	0.211657	0.176161	PRKACA/PSME2/PSME1/PSMA4	4
HPV PPIs	KEGG_ANTIGEN_PROCESSING_AND_PRESENTATION	KEGG_ANTIGEN_PROCESSING_AND_PRESENTATION	5/282	88/13356	0.0384489	0.214415	0.178456	HLA-C/PSME2/PSME1/HLA-A/HLA-B	5
HPV PPIs	REACTOME_RHOA_GTPASE_CYCLE	REACTOME_RHOA_GTPASE_CYCLE	7/282	149/13356	0.0387512	0.214415	0.178456	FAF2/EMC3/SCFD1/ARHGAP35/ARHGAP19/RACGAP1/LBR	7
HPV PPIs	REACTOME_MISMATCH_REPAIR	REACTOME_MISMATCH_REPAIR	2/282	15/13356	0.0389208	0.214415	0.178456	RPA1/MSH3	2
HPV PPIs	WP_BIOMARKERS_FOR_PYRIMIDINE_METABOLISM_DISORDERS	WP_BIOMARKERS_FOR_PYRIMIDINE_METABOLISM_DISORDERS	2/282	15/13356	0.0389208	0.214415	0.178456	TYMS/RRM2	2
HPV PPIs	PID_AR_PATHWAY	PID_AR_PATHWAY	4/282	61/13356	0.0397302	0.21692	0.180541	PELP1/BRCA1/UBE3A/RANBP9	4
HPV PPIs	REACTOME_KINESINS	REACTOME_KINESINS	4/282	61/13356	0.0397302	0.21692	0.180541	RACGAP1/KIF11/TUBA4A/KIF23	4
HPV PPIs	REACTOME_SIGNALING_BY_HEDGEHOG	REACTOME_SIGNALING_BY_HEDGEHOG	7/282	150/13356	0.0399475	0.217137	0.180722	PRKACA/PSME2/DERL2/PSME1/PSMA4/CUL3/TUBA4A	7
HPV PPIs	REACTOME_TRANSCRIPTIONAL_REGULATION_BY_RUNX2	REACTOME_TRANSCRIPTIONAL_REGULATION_BY_RUNX2	6/282	120/13356	0.0417438	0.225161	0.1874	CCNB1/PSME2/PSME1/RB1/PSMA4/HDAC3	6
HPV PPIs	WP_DYRK1A	WP_DYRK1A	4/282	62/13356	0.041792	0.225161	0.1874	TFDP1/RBL1/TFDP3/TFDP2	4
HPV PPIs	KEGG_ALLOGRAFT_REJECTION	KEGG_ALLOGRAFT_REJECTION	3/282	37/13356	0.0427002	0.225655	0.187812	HLA-C/HLA-A/HLA-B	3
HPV PPIs	REACTOME_ACTIVATION_OF_ATR_IN_RESPONSE_TO_REPLICATION_STRESS	REACTOME_ACTIVATION_OF_ATR_IN_RESPONSE_TO_REPLICATION_STRESS	3/282	37/13356	0.0427002	0.225655	0.187812	RPA1/CDC7/MCM5	3
HPV PPIs	REACTOME_NR1H3_NR1H2_REGULATE_GENE_EXPRESSION_LINKED_TO_CHOLESTEROL_TRANSPORT_AND_EFFLUX	REACTOME_NR1H3_NR1H2_REGULATE_GENE_EXPRESSION_LINKED_TO_CHOLESTEROL_TRANSPORT_AND_EFFLUX	3/282	37/13356	0.0427002	0.225655	0.187812	NCOR1/TBL1XR1/HDAC3	3
HPV PPIs	WP_GENETIC_CAUSES_OF_PSVDINCPH	WP_GENETIC_CAUSES_OF_PSVDINCPH	3/282	37/13356	0.0427002	0.225655	0.187812	GTF2I/SP1/CHCHD2	3
HPV PPIs	REACTOME_SARS_COV_2_INFECTION	REACTOME_SARS_COV_2_INFECTION	11/282	289/13356	0.0433135	0.225655	0.187812	SRPK1/NUP88/RPN2/DDOST/DAD1/HLA-C/RPN1/HLA-A/HLA-B/RB1/TOMM70	11
HPV PPIs	BIOCARTA_EFP_PATHWAY	BIOCARTA_EFP_PATHWAY	2/282	16/13356	0.0438733	0.225655	0.187812	CCNB1/CDK5	2
HPV PPIs	BIOCARTA_P53_PATHWAY	BIOCARTA_P53_PATHWAY	2/282	16/13356	0.0438733	0.225655	0.187812	RB1/E2F1	2
HPV PPIs	WP_H19_ACTION_RBE2F1_SIGNALING_AND_CDKBETACATENIN_ACTIVITY	WP_H19_ACTION_RBE2F1_SIGNALING_AND_CDKBETACATENIN_ACTIVITY	2/282	16/13356	0.0438733	0.225655	0.187812	RB1/E2F1	2
HPV PPIs	WP_ID_SIGNALING_PATHWAY	WP_ID_SIGNALING_PATHWAY	2/282	16/13356	0.0438733	0.225655	0.187812	RB1/RBL1	2
HPV PPIs	REACTOME_TRANSPORT_TO_THE_GOLGI_AND_SUBSEQUENT_MODIFICATION	REACTOME_TRANSPORT_TO_THE_GOLGI_AND_SUBSEQUENT_MODIFICATION	8/282	186/13356	0.0438906	0.225655	0.187812	SCFD1/COPB2/SEC23IP/COPA/COPB1/PPP6R3/PPP6R1/TUBA4A	8
HPV PPIs	PID_MYC_REPRESS_PATHWAY	PID_MYC_REPRESS_PATHWAY	4/282	63/13356	0.0439133	0.225655	0.187812	BRCA1/RBL1/SP1/HDAC3	4
HPV PPIs	WP_BREAST_CANCER_PATHWAY	WP_BREAST_CANCER_PATHWAY	7/282	154/13356	0.0449732	0.22831	0.190021	CSNK2A1/APC/BRCA1/RB1/E2F1/E2F3/SP1	7
HPV PPIs	REACTOME_SUMOYLATION	REACTOME_SUMOYLATION	8/282	187/13356	0.0450525	0.22831	0.190021	RANGAP1/RPA1/BLM/TOP2B/HDAC2/NUP88/BRCA1/CBX5	8
HPV PPIs	REACTOME_GLUCOSE_METABOLISM	REACTOME_GLUCOSE_METABOLISM	5/282	92/13356	0.0451533	0.22831	0.190021	PRKACA/NUP88/PFKP/PFKM/SLC25A1	5
HPV PPIs	REACTOME_UB_SPECIFIC_PROCESSING_PROTEASES	REACTOME_UB_SPECIFIC_PROCESSING_PROTEASES	9/282	221/13356	0.0451765	0.22831	0.190021	WDR48/WDR20/USP12/UFD1/PSME2/PSME1/PSMA4/IDE/TOMM70	9
HPV PPIs	REACTOME_DNA_DAMAGE_RECOGNITION_IN_GG_NER	REACTOME_DNA_DAMAGE_RECOGNITION_IN_GG_NER	3/282	38/13356	0.0456601	0.228862	0.19048	COPS2/COPS3/COPS4	3
HPV PPIs	WP_MBDNF_AND_PROBDNF_REGULATION_OF_GABA_NEUROTRANSMISSION	WP_MBDNF_AND_PROBDNF_REGULATION_OF_GABA_NEUROTRANSMISSION	3/282	38/13356	0.0456601	0.228862	0.19048	AP2A1/AP2A2/AP2B1	3
HPV PPIs	REACTOME_DNA_REPLICATION	REACTOME_DNA_REPLICATION	8/282	188/13356	0.0462346	0.230795	0.192089	RPA1/PSME2/PSME1/CDC7/CDC23/ANAPC1/MCM5/PSMA4	8
HPV PPIs	REACTOME_HEDGEHOG_LIGAND_BIOGENESIS	REACTOME_HEDGEHOG_LIGAND_BIOGENESIS	4/282	65/13356	0.0483344	0.234305	0.195011	PSME2/DERL2/PSME1/PSMA4	4
HPV PPIs	PID_ECADHERIN_NASCENT_AJ_PATHWAY	PID_ECADHERIN_NASCENT_AJ_PATHWAY	3/282	39/13356	0.048719	0.234305	0.195011	CSNK2A1/AP1M1/CTTN	3
HPV PPIs	REACTOME_FANCONI_ANEMIA_PATHWAY	REACTOME_FANCONI_ANEMIA_PATHWAY	3/282	39/13356	0.048719	0.234305	0.195011	WDR48/USP1/RPA1	3
HPV PPIs	REACTOME_SIGNALING_BY_WNT	REACTOME_SIGNALING_BY_WNT	12/282	331/13356	0.0487206	0.234305	0.195011	CSNK2A1/APC/PSME2/PSME1/AP2M1/AP2A1/AP2A2/AP2B1/PSMA4/CTBP2/CUL3/CHD8	12
HPV PPIs	REACTOME_HDACS_DEACETYLATE_HISTONES	REACTOME_HDACS_DEACETYLATE_HISTONES	5/282	94/13356	0.0487513	0.234305	0.195011	HDAC2/MTA2/NCOR1/TBL1XR1/HDAC3	5
HPV PPIs	BIOCARTA_ARF_PATHWAY	BIOCARTA_ARF_PATHWAY	2/282	17/13356	0.0490451	0.234305	0.195011	RB1/E2F1	2
HPV PPIs	BIOCARTA_HCMV_PATHWAY	BIOCARTA_HCMV_PATHWAY	2/282	17/13356	0.0490451	0.234305	0.195011	RB1/SP1	2
HPV PPIs	BIOCARTA_NDKDYNAMIN_PATHWAY	BIOCARTA_NDKDYNAMIN_PATHWAY	2/282	17/13356	0.0490451	0.234305	0.195011	AP2M1/AP2A1	2
HPV PPIs	REACTOME_ACETYLCHOLINE_NEUROTRANSMITTER_RELEASE_CYCLE	REACTOME_ACETYLCHOLINE_NEUROTRANSMITTER_RELEASE_CYCLE	2/282	17/13356	0.0490451	0.234305	0.195011	PPFIA1/PPFIA2	2
HPV PPIs	WP_PYRIMIDINE_METABOLISM_AND_RELATED_DISEASES	WP_PYRIMIDINE_METABOLISM_AND_RELATED_DISEASES	2/282	17/13356	0.0490451	0.234305	0.195011	TYMS/RRM2	2
HPV PPIs	WP_REGULATION_OF_WNT_BCATENIN_SIGNALING_BY_SMALL_MOLECULE_COMPOUNDS	WP_REGULATION_OF_WNT_BCATENIN_SIGNALING_BY_SMALL_MOLECULE_COMPOUNDS	2/282	17/13356	0.0490451	0.234305	0.195011	LRP1/APC	2
HPV PPIs	REACTOME_RESOLUTION_OF_SISTER_CHROMATID_COHESION	REACTOME_RESOLUTION_OF_SISTER_CHROMATID_COHESION	6/282	126/13356	0.0508156	0.241819	0.201264	RANGAP1/CCNB1/CKAP5/RCC2/CLASP1/TUBA4A	6
HPV PPIs	PID_FOXM1_PATHWAY	PID_FOXM1_PATHWAY	3/282	40/13356	0.0518757	0.245907	0.204667	CCNB1/RB1/SP1	3
HPV PPIs	KEGG_SPLICEOSOME	KEGG_SPLICEOSOME	6/282	127/13356	0.052436	0.247603	0.206079	SF3B1/SRSF5/U2SURP/CHERP/PUF60/U2AF2	6
HPV PPIs	WP_AMPACTIVATED_PROTEIN_KINASE_SIGNALING	WP_AMPACTIVATED_PROTEIN_KINASE_SIGNALING	4/282	67/13356	0.0529925	0.249141	0.207358	CCNB1/STK11/STRADA/CAB39	4
HPV PPIs	BIOCARTA_MTA3_PATHWAY	BIOCARTA_MTA3_PATHWAY	2/282	18/13356	0.0544247	0.249141	0.207358	TUBA4A/HSPB1	2
HPV PPIs	REACTOME_NOREPINEPHRINE_NEUROTRANSMITTER_RELEASE_CYCLE	REACTOME_NOREPINEPHRINE_NEUROTRANSMITTER_RELEASE_CYCLE	2/282	18/13356	0.0544247	0.249141	0.207358	PPFIA1/PPFIA2	2
HPV PPIs	REACTOME_RNA_POLYMERASE_III_CHAIN_ELONGATION	REACTOME_RNA_POLYMERASE_III_CHAIN_ELONGATION	2/282	18/13356	0.0544247	0.249141	0.207358	POLR2E/POLR2H	2
HPV PPIs	REACTOME_SEROTONIN_NEUROTRANSMITTER_RELEASE_CYCLE	REACTOME_SEROTONIN_NEUROTRANSMITTER_RELEASE_CYCLE	2/282	18/13356	0.0544247	0.249141	0.207358	PPFIA1/PPFIA2	2
HPV PPIs	WP_CHOLESTEROL_SYNTHESIS_DISORDERS	WP_CHOLESTEROL_SYNTHESIS_DISORDERS	2/282	18/13356	0.0544247	0.249141	0.207358	DHCR7/LBR	2
HPV PPIs	REACTOME_PROCESSING_OF_DNA_DOUBLE_STRAND_BREAK_ENDS	REACTOME_PROCESSING_OF_DNA_DOUBLE_STRAND_BREAK_ENDS	5/282	97/13356	0.0544571	0.249141	0.207358	RPA1/BLM/NSD2/BRCA1/TOPBP1	5
HPV PPIs	KEGG_GRAFT_VERSUS_HOST_DISEASE	KEGG_GRAFT_VERSUS_HOST_DISEASE	3/282	41/13356	0.0551289	0.249141	0.207358	HLA-C/HLA-A/HLA-B	3
HPV PPIs	REACTOME_MTOR_SIGNALLING	REACTOME_MTOR_SIGNALLING	3/282	41/13356	0.0551289	0.249141	0.207358	STK11/STRADA/CAB39	3
HPV PPIs	REACTOME_NS1_MEDIATED_EFFECTS_ON_HOST_PATHWAYS	REACTOME_NS1_MEDIATED_EFFECTS_ON_HOST_PATHWAYS	3/282	41/13356	0.0551289	0.249141	0.207358	NUP88/KPNA4/KPNA3	3
HPV PPIs	REACTOME_RNA_POLYMERASE_III_TRANSCRIPTION	REACTOME_RNA_POLYMERASE_III_TRANSCRIPTION	3/282	41/13356	0.0551289	0.249141	0.207358	POLR2E/ZNF143/POLR2H	3
HPV PPIs	REACTOME_COPII_MEDIATED_VESICLE_TRANSPORT	REACTOME_COPII_MEDIATED_VESICLE_TRANSPORT	4/282	68/13356	0.05541	0.249141	0.207358	SCFD1/SEC23IP/PPP6R3/PPP6R1	4
HPV PPIs	REACTOME_HDR_THROUGH_HOMOLOGOUS_RECOMBINATION_HRR	REACTOME_HDR_THROUGH_HOMOLOGOUS_RECOMBINATION_HRR	4/282	68/13356	0.05541	0.249141	0.207358	RPA1/BLM/BRCA1/TOPBP1	4
HPV PPIs	WP_MIRNA_REGULATION_OF_DNA_DAMAGE_RESPONSE	WP_MIRNA_REGULATION_OF_DNA_DAMAGE_RESPONSE	5/282	98/13356	0.0564415	0.25285	0.210445	CCNB1/BRCA1/RB1/E2F1/CDK5	5
HPV PPIs	REACTOME_REGULATION_OF_PTEN_STABILITY_AND_ACTIVITY	REACTOME_REGULATION_OF_PTEN_STABILITY_AND_ACTIVITY	4/282	69/13356	0.0578861	0.258187	0.214887	CSNK2A1/PSME2/PSME1/PSMA4	4
HPV PPIs	KEGG_BLADDER_CANCER	KEGG_BLADDER_CANCER	3/282	42/13356	0.0584773	0.258187	0.214887	RB1/E2F1/E2F3	3
HPV PPIs	REACTOME_ACTIVATION_OF_GENE_EXPRESSION_BY_SREBF_SREBP	REACTOME_ACTIVATION_OF_GENE_EXPRESSION_BY_SREBF_SREBP	3/282	42/13356	0.0584773	0.258187	0.214887	DHCR7/SP1/TBL1XR1	3
HPV PPIs	WP_DNA_REPLICATION	WP_DNA_REPLICATION	3/282	42/13356	0.0584773	0.258187	0.214887	RPA1/CDC7/MCM5	3
HPV PPIs	REACTOME_CELLULAR_SENESCENCE	REACTOME_CELLULAR_SENESCENCE	8/282	198/13356	0.0591777	0.259299	0.215812	RB1/E2F1/E2F3/CDC23/TFDP1/ANAPC1/SP1/TFDP2	8
HPV PPIs	BIOCARTA_LIS1_PATHWAY	BIOCARTA_LIS1_PATHWAY	2/282	19/13356	0.0600012	0.259299	0.215812	CSNK2A1/CDK5	2
HPV PPIs	REACTOME_PROCESSIVE_SYNTHESIS_ON_THE_C_STRAND_OF_THE_TELOMERE	REACTOME_PROCESSIVE_SYNTHESIS_ON_THE_C_STRAND_OF_THE_TELOMERE	2/282	19/13356	0.0600012	0.259299	0.215812	RPA1/BLM	2
HPV PPIs	REACTOME_RHO_GTPASES_ACTIVATE_CIT	REACTOME_RHO_GTPASES_ACTIVATE_CIT	2/282	19/13356	0.0600012	0.259299	0.215812	PPP1CB/PRC1	2
HPV PPIs	REACTOME_SIGNALING_BY_FGFR2_IIIA_TM	REACTOME_SIGNALING_BY_FGFR2_IIIA_TM	2/282	19/13356	0.0600012	0.259299	0.215812	POLR2E/POLR2H	2
HPV PPIs	REACTOME_TRANSLESION_SYNTHESIS_BY_POLH	REACTOME_TRANSLESION_SYNTHESIS_BY_POLH	2/282	19/13356	0.0600012	0.259299	0.215812	RPA1/UFD1	2
HPV PPIs	KEGG_TYPE_I_DIABETES_MELLITUS	KEGG_TYPE_I_DIABETES_MELLITUS	3/282	43/13356	0.0619195	0.265711	0.221149	HLA-C/HLA-A/HLA-B	3
HPV PPIs	WP_4249_HEDGEHOG_SIGNALING_PATHWAY	WP_4249_HEDGEHOG_SIGNALING_PATHWAY	3/282	43/13356	0.0619195	0.265711	0.221149	PRKACA/LRP2/CUL3	3
HPV PPIs	WP_WNT_SIGNALING_PATHWAY_AND_PLURIPOTENCY	WP_WNT_SIGNALING_PATHWAY_AND_PLURIPOTENCY	5/282	101/13356	0.0626419	0.267871	0.222947	APC/PPP2R2A/RACGAP1/CTBP2/PRKCI	5
HPV PPIs	REACTOME_ORC1_REMOVAL_FROM_CHROMATIN	REACTOME_ORC1_REMOVAL_FROM_CHROMATIN	4/282	71/13356	0.0630133	0.26852	0.223488	PSME2/PSME1/MCM5/PSMA4	4
HPV PPIs	PID_HNF3A_PATHWAY	PID_HNF3A_PATHWAY	3/282	44/13356	0.0654539	0.274503	0.228467	BRCA1/VTN/SP1	3
HPV PPIs	REACTOME_VIRAL_MESSENGER_RNA_SYNTHESIS	REACTOME_VIRAL_MESSENGER_RNA_SYNTHESIS	3/282	44/13356	0.0654539	0.274503	0.228467	POLR2E/NUP88/POLR2H	3
HPV PPIs	REACTOME_GLYCOLYSIS	REACTOME_GLYCOLYSIS	4/282	72/13356	0.0656637	0.274503	0.228467	PRKACA/NUP88/PFKP/PFKM	4
HPV PPIs	PID_WNT_CANONICAL_PATHWAY	PID_WNT_CANONICAL_PATHWAY	2/282	20/13356	0.065764	0.274503	0.228467	APC/CUL3	2
HPV PPIs	REACTOME_CONVERSION_FROM_APC_C_CDC20_TO_APC_C_CDH1_IN_LATE_ANAPHASE	REACTOME_CONVERSION_FROM_APC_C_CDC20_TO_APC_C_CDH1_IN_LATE_ANAPHASE	2/282	20/13356	0.065764	0.274503	0.228467	CDC23/ANAPC1	2
HPV PPIs	REACTOME_RECEPTOR_TYPE_TYROSINE_PROTEIN_PHOSPHATASES	REACTOME_RECEPTOR_TYPE_TYROSINE_PROTEIN_PHOSPHATASES	2/282	20/13356	0.065764	0.274503	0.228467	PPFIA1/PPFIA2	2
HPV PPIs	REACTOME_MITOTIC_PROMETAPHASE	REACTOME_MITOTIC_PROMETAPHASE	8/282	203/13356	0.0664286	0.276334	0.229991	RANGAP1/CCNB1/CSNK2A1/CKAP5/PRKACA/RCC2/CLASP1/TUBA4A	8
HPV PPIs	REACTOME_ABC_FAMILY_PROTEINS_MEDIATED_TRANSPORT	REACTOME_ABC_FAMILY_PROTEINS_MEDIATED_TRANSPORT	5/282	103/13356	0.0669809	0.277687	0.231117	RNF5/PSME2/DERL2/PSME1/PSMA4	5
HPV PPIs	REACTOME_INTERFERON_SIGNALING	REACTOME_INTERFERON_SIGNALING	8/282	204/13356	0.0679419	0.28072	0.233641	FLNA/NUP88/HLA-C/HLA-A/HLA-B/KPNA4/TRIM26/KPNA3	8
HPV PPIs	WP_NOTCH_SIGNALING	WP_NOTCH_SIGNALING	3/282	45/13356	0.0690789	0.284456	0.236751	HDAC2/CTBP2/DTX3L	3
HPV PPIs	REACTOME_RHOG_GTPASE_CYCLE	REACTOME_RHOG_GTPASE_CYCLE	4/282	74/13356	0.0711361	0.288462	0.240085	NDUFA5/ESYT1/ARHGAP35/LBR	4
HPV PPIs	REACTOME_SIGNALING_BY_NOTCH1	REACTOME_SIGNALING_BY_NOTCH1	4/282	74/13356	0.0711361	0.288462	0.240085	HDAC2/NCOR1/TBL1XR1/HDAC3	4
HPV PPIs	WP_HEAD_AND_NECK_SQUAMOUS_CELL_CARCINOMA	WP_HEAD_AND_NECK_SQUAMOUS_CELL_CARCINOMA	4/282	74/13356	0.0711361	0.288462	0.240085	STK11/RB1/E2F1/CUL3	4
HPV PPIs	BIOCARTA_P53HYPOXIA_PATHWAY	BIOCARTA_P53HYPOXIA_PATHWAY	2/282	21/13356	0.0717027	0.288462	0.240085	RPA1/DNAJB1	2
HPV PPIs	REACTOME_ER_QUALITY_CONTROL_COMPARTMENT_ERQC	REACTOME_ER_QUALITY_CONTROL_COMPARTMENT_ERQC	2/282	21/13356	0.0717027	0.288462	0.240085	RNF5/DERL2	2
HPV PPIs	REACTOME_INHIBITION_OF_THE_PROTEOLYTIC_ACTIVITY_OF_APC_C_REQUIRED_FOR_THE_ONSET_OF_ANAPHASE_BY_MITOTIC_SPINDLE_CHECKPOINT_COMPONENTS	REACTOME_INHIBITION_OF_THE_PROTEOLYTIC_ACTIVITY_OF_APC_C_REQUIRED_FOR_THE_ONSET_OF_ANAPHASE_BY_MITOTIC_SPINDLE_CHECKPOINT_COMPONENTS	2/282	21/13356	0.0717027	0.288462	0.240085	CDC23/ANAPC1	2
HPV PPIs	WP_NICOTINE_EFFECT_ON_DOPAMINERGIC_NEURONS	WP_NICOTINE_EFFECT_ON_DOPAMINERGIC_NEURONS	2/282	21/13356	0.0717027	0.288462	0.240085	PRKACA/CDK5	2
HPV PPIs	KEGG_PROTEASOME	KEGG_PROTEASOME	3/282	46/13356	0.0727931	0.289987	0.241354	PSME2/PSME1/PSMA4	3
HPV PPIs	REACTOME_SUMOYLATION_OF_DNA_REPLICATION_PROTEINS	REACTOME_SUMOYLATION_OF_DNA_REPLICATION_PROTEINS	3/282	46/13356	0.0727931	0.289987	0.241354	RANGAP1/TOP2B/NUP88	3
HPV PPIs	WP_MICROTUBULE_CYTOSKELETON_REGULATION	WP_MICROTUBULE_CYTOSKELETON_REGULATION	3/282	46/13356	0.0727931	0.289987	0.241354	APC/PRKACA/CLASP1	3
HPV PPIs	REACTOME_PROGRAMMED_CELL_DEATH	REACTOME_PROGRAMMED_CELL_DEATH	8/282	208/13356	0.0742068	0.294659	0.245242	APC/PSME2/PSME1/E2F1/TFDP1/PSMA4/OGT/TFDP2	8
HPV PPIs	REACTOME_CHROMOSOME_MAINTENANCE	REACTOME_CHROMOSOME_MAINTENANCE	6/282	140/13356	0.076354	0.300242	0.249889	RPA1/BLM/POLR2E/SMARCA5/PPP6R3/POLR2H	6
HPV PPIs	KEGG_NOTCH_SIGNALING_PATHWAY	KEGG_NOTCH_SIGNALING_PATHWAY	3/282	47/13356	0.0765947	0.300242	0.249889	HDAC2/CTBP2/DTX3L	3
HPV PPIs	REACTOME_NR1H2_AND_NR1H3_MEDIATED_SIGNALING	REACTOME_NR1H2_AND_NR1H3_MEDIATED_SIGNALING	3/282	47/13356	0.0765947	0.300242	0.249889	NCOR1/TBL1XR1/HDAC3	3
HPV PPIs	WP_CHOLESTEROL_METABOLISM_WITH_BLOCH_AND_KANDUTSCHRUSSELL_PATHWAYS	WP_CHOLESTEROL_METABOLISM_WITH_BLOCH_AND_KANDUTSCHRUSSELL_PATHWAYS	3/282	47/13356	0.0765947	0.300242	0.249889	ELOVL5/DHCR7/LBR	3
HPV PPIs	REACTOME_INSERTION_OF_TAIL_ANCHORED_PROTEINS_INTO_THE_ENDOPLASMIC_RETICULUM_MEMBRANE	REACTOME_INSERTION_OF_TAIL_ANCHORED_PROTEINS_INTO_THE_ENDOPLASMIC_RETICULUM_MEMBRANE	2/282	22/13356	0.0778074	0.304021	0.253034	GET4/SGTA	2
HPV PPIs	REACTOME_SUMOYLATION_OF_DNA_DAMAGE_RESPONSE_AND_REPAIR_PROTEINS	REACTOME_SUMOYLATION_OF_DNA_DAMAGE_RESPONSE_AND_REPAIR_PROTEINS	4/282	77/13356	0.0797673	0.310686	0.258582	RPA1/BLM/NUP88/BRCA1	4
HPV PPIs	REACTOME_NEGATIVE_EPIGENETIC_REGULATION_OF_RRNA_EXPRESSION	REACTOME_NEGATIVE_EPIGENETIC_REGULATION_OF_RRNA_EXPRESSION	5/282	109/13356	0.0809739	0.314384	0.26166	UBTF/POLR2E/SMARCA5/HDAC2/POLR2H	5
HPV PPIs	REACTOME_DISORDERS_OF_TRANSMEMBRANE_TRANSPORTERS	REACTOME_DISORDERS_OF_TRANSMEMBRANE_TRANSPORTERS	7/282	177/13356	0.0815851	0.315755	0.262801	NUP88/RNF5/PSME2/DERL2/PSME1/SLC3A2/PSMA4	7
HPV PPIs	KEGG_MISMATCH_REPAIR	KEGG_MISMATCH_REPAIR	2/282	23/13356	0.0840685	0.320298	0.266582	RPA1/MSH3	2
HPV PPIs	REACTOME_ABORTIVE_ELONGATION_OF_HIV_1_TRANSCRIPT_IN_THE_ABSENCE_OF_TAT	REACTOME_ABORTIVE_ELONGATION_OF_HIV_1_TRANSCRIPT_IN_THE_ABSENCE_OF_TAT	2/282	23/13356	0.0840685	0.320298	0.266582	POLR2E/POLR2H	2
HPV PPIs	REACTOME_DOPAMINE_NEUROTRANSMITTER_RELEASE_CYCLE	REACTOME_DOPAMINE_NEUROTRANSMITTER_RELEASE_CYCLE	2/282	23/13356	0.0840685	0.320298	0.266582	PPFIA1/PPFIA2	2
HPV PPIs	REACTOME_RNA_POLYMERASE_III_TRANSCRIPTION_TERMINATION	REACTOME_RNA_POLYMERASE_III_TRANSCRIPTION_TERMINATION	2/282	23/13356	0.0840685	0.320298	0.266582	POLR2E/POLR2H	2
HPV PPIs	WP_ESTROGEN_SIGNALING_PATHWAY	WP_ESTROGEN_SIGNALING_PATHWAY	2/282	23/13356	0.0840685	0.320298	0.266582	PRKACA/SP1	2
HPV PPIs	REACTOME_APOPTOSIS	REACTOME_APOPTOSIS	7/282	179/13356	0.0853993	0.324358	0.269961	APC/PSME2/PSME1/E2F1/TFDP1/PSMA4/TFDP2	7
HPV PPIs	PID_MET_PATHWAY	PID_MET_PATHWAY	4/282	79/13356	0.0857972	0.324469	0.270054	APC/RANBP10/RANBP9/PRKCI	4
HPV PPIs	REACTOME_RNA_POLYMERASE_I_TRANSCRIPTION	REACTOME_RNA_POLYMERASE_I_TRANSCRIPTION	5/282	111/13356	0.0859592	0.324469	0.270054	UBTF/POLR2E/HDAC2/MTA2/POLR2H	5
HPV PPIs	REACTOME_MAPK_FAMILY_SIGNALING_CASCADES	REACTOME_MAPK_FAMILY_SIGNALING_CASCADES	11/282	327/13356	0.0870139	0.32744	0.272526	PRKACA/PPP1CB/DNAJB1/PSME2/PSME1/KSR1/RANBP9/PSMA4/CUL3/RASAL2/HSPB1	11
HPV PPIs	REACTOME_CROSS_PRESENTATION_OF_SOLUBLE_EXOGENOUS_ANTIGENS_ENDOSOMES	REACTOME_CROSS_PRESENTATION_OF_SOLUBLE_EXOGENOUS_ANTIGENS_ENDOSOMES	3/282	50/13356	0.0885069	0.331021	0.275507	PSME2/PSME1/PSMA4	3
HPV PPIs	REACTOME_MRNA_SPLICING_MINOR_PATHWAY	REACTOME_MRNA_SPLICING_MINOR_PATHWAY	3/282	50/13356	0.0885069	0.331021	0.275507	SF3B1/POLR2E/POLR2H	3
HPV PPIs	PID_BETA_CATENIN_NUC_PATHWAY	PID_BETA_CATENIN_NUC_PATHWAY	4/282	80/13356	0.0888933	0.331453	0.275866	APC/HDAC2/TBL1XR1/CHD8	4
HPV PPIs	BIOCARTA_G2_PATHWAY	BIOCARTA_G2_PATHWAY	2/282	24/13356	0.0904767	0.331601	0.275989	CCNB1/BRCA1	2
HPV PPIs	BIOCARTA_WNT_PATHWAY	BIOCARTA_WNT_PATHWAY	2/282	24/13356	0.0904767	0.331601	0.275989	CSNK2A1/APC	2
HPV PPIs	REACTOME_DARPP_32_EVENTS	REACTOME_DARPP_32_EVENTS	2/282	24/13356	0.0904767	0.331601	0.275989	PRKACA/CDK5	2
HPV PPIs	REACTOME_RUNX2_REGULATES_OSTEOBLAST_DIFFERENTIATION	REACTOME_RUNX2_REGULATES_OSTEOBLAST_DIFFERENTIATION	2/282	24/13356	0.0904767	0.331601	0.275989	RB1/HDAC3	2
HPV PPIs	REACTOME_TRIGLYCERIDE_CATABOLISM	REACTOME_TRIGLYCERIDE_CATABOLISM	2/282	24/13356	0.0904767	0.331601	0.275989	PRKACA/PPP1CB	2
HPV PPIs	KEGG_OOCYTE_MEIOSIS	KEGG_OOCYTE_MEIOSIS	5/282	113/13356	0.0911021	0.331601	0.275989	CCNB1/PRKACA/PPP1CB/CDC23/ANAPC1	5
HPV PPIs	REACTOME_HEDGEHOG_OFF_STATE	REACTOME_HEDGEHOG_OFF_STATE	5/282	113/13356	0.0911021	0.331601	0.275989	PRKACA/PSME2/PSME1/PSMA4/TUBA4A	5
HPV PPIs	REACTOME_TELOMERE_MAINTENANCE	REACTOME_TELOMERE_MAINTENANCE	5/282	113/13356	0.0911021	0.331601	0.275989	RPA1/BLM/POLR2E/PPP6R3/POLR2H	5
HPV PPIs	REACTOME_RECRUITMENT_OF_MITOTIC_CENTROSOME_PROTEINS_AND_COMPLEXES	REACTOME_RECRUITMENT_OF_MITOTIC_CENTROSOME_PROTEINS_AND_COMPLEXES	4/282	81/13356	0.0920427	0.333042	0.277189	CKAP5/PRKACA/CLASP1/TUBA4A	4
HPV PPIs	REACTOME_RNA_POLYMERASE_II_TRANSCRIBES_SNRNA_GENES	REACTOME_RNA_POLYMERASE_II_TRANSCRIBES_SNRNA_GENES	4/282	81/13356	0.0920427	0.333042	0.277189	POLR2E/ZNF143/SP1/POLR2H	4
HPV PPIs	REACTOME_EXTENSION_OF_TELOMERES	REACTOME_EXTENSION_OF_TELOMERES	3/282	51/13356	0.0926407	0.333234	0.277349	RPA1/BLM/PPP6R3	3
HPV PPIs	REACTOME_NEUROTRANSMITTER_RELEASE_CYCLE	REACTOME_NEUROTRANSMITTER_RELEASE_CYCLE	3/282	51/13356	0.0926407	0.333234	0.277349	PPFIA1/PPFIA2/ARL6IP5	3
HPV PPIs	REACTOME_ANTIVIRAL_MECHANISM_BY_IFN_STIMULATED_GENES	REACTOME_ANTIVIRAL_MECHANISM_BY_IFN_STIMULATED_GENES	4/282	82/13356	0.0952447	0.341596	0.284308	FLNA/NUP88/KPNA4/KPNA3	4
HPV PPIs	REACTOME_RHO_GTPASE_CYCLE	REACTOME_RHO_GTPASE_CYCLE	14/282	450/13356	0.0959442	0.342946	0.285432	COPS2/COPS4/NDUFA5/FAF2/ESYT1/EMC3/SCFD1/ARHGAP35/ARHGAP19/RACGAP1/CUL3/RASAL2/RNF20/LBR	14
HPV PPIs	BIOCARTA_PPARA_PATHWAY	BIOCARTA_PPARA_PATHWAY	3/282	52/13356	0.0968531	0.342946	0.285432	NCOR1/RB1/SP1	3
HPV PPIs	KEGG_AUTOIMMUNE_THYROID_DISEASE	KEGG_AUTOIMMUNE_THYROID_DISEASE	3/282	52/13356	0.0968531	0.342946	0.285432	HLA-C/HLA-A/HLA-B	3
HPV PPIs	KEGG_MTOR_SIGNALING_PATHWAY	KEGG_MTOR_SIGNALING_PATHWAY	3/282	52/13356	0.0968531	0.342946	0.285432	STK11/STRADA/CAB39	3
HPV PPIs	REACTOME_CYCLIN_A_B1_B2_ASSOCIATED_EVENTS_DURING_G2_M_TRANSITION	REACTOME_CYCLIN_A_B1_B2_ASSOCIATED_EVENTS_DURING_G2_M_TRANSITION	2/282	25/13356	0.0970231	0.342946	0.285432	CCNB1/PPP2R2A	2
HPV PPIs	WP_GLIOBLASTOMA_SIGNALING_PATHWAYS	WP_GLIOBLASTOMA_SIGNALING_PATHWAYS	4/282	83/13356	0.0984987	0.347158	0.288937	BRCA1/RB1/E2F1/PRKCI	4
HPV PPIs	KEGG_WNT_SIGNALING_PATHWAY	KEGG_WNT_SIGNALING_PATHWAY	6/282	151/13356	0.1007	0.353895	0.294545	CSNK2A1/APC/PRKACA/TBL1XR1/CTBP2/CHD8	6
HPV PPIs	PID_CMYB_PATHWAY	PID_CMYB_PATHWAY	4/282	84/13356	0.101804	0.354719	0.29523	CCNB1/COPA/NCOR1/SP1	4
HPV PPIs	REACTOME_GLOBAL_GENOME_NUCLEOTIDE_EXCISION_REPAIR_GG_NER	REACTOME_GLOBAL_GENOME_NUCLEOTIDE_EXCISION_REPAIR_GG_NER	4/282	84/13356	0.101804	0.354719	0.29523	RPA1/COPS2/COPS3/COPS4	4
HPV PPIs	WP_PYRIMIDINE_METABOLISM	WP_PYRIMIDINE_METABOLISM	4/282	84/13356	0.101804	0.354719	0.29523	POLR2E/TYMS/POLR2H/RRM2	4
HPV PPIs	KEGG_GALACTOSE_METABOLISM	KEGG_GALACTOSE_METABOLISM	2/282	26/13356	0.103699	0.356247	0.296502	PFKP/PFKM	2
HPV PPIs	PID_INSULIN_GLUCOSE_PATHWAY	PID_INSULIN_GLUCOSE_PATHWAY	2/282	26/13356	0.103699	0.356247	0.296502	TBC1D4/PRKCI	2
HPV PPIs	REACTOME_APC_CDC20_MEDIATED_DEGRADATION_OF_NEK2A	REACTOME_APC_CDC20_MEDIATED_DEGRADATION_OF_NEK2A	2/282	26/13356	0.103699	0.356247	0.296502	CDC23/ANAPC1	2
HPV PPIs	REACTOME_CALNEXIN_CALRETICULIN_CYCLE	REACTOME_CALNEXIN_CALRETICULIN_CYCLE	2/282	26/13356	0.103699	0.356247	0.296502	RNF5/DERL2	2
HPV PPIs	REACTOME_DOWNREGULATION_OF_TGF_BETA_RECEPTOR_SIGNALING	REACTOME_DOWNREGULATION_OF_TGF_BETA_RECEPTOR_SIGNALING	2/282	26/13356	0.103699	0.356247	0.296502	PPP1CB/UCHL5	2
HPV PPIs	KEGG_PROGESTERONE_MEDIATED_OOCYTE_MATURATION	KEGG_PROGESTERONE_MEDIATED_OOCYTE_MATURATION	4/282	85/13356	0.10516	0.358427	0.298316	CCNB1/PRKACA/CDC23/ANAPC1	4
HPV PPIs	KEGG_NON_SMALL_CELL_LUNG_CANCER	KEGG_NON_SMALL_CELL_LUNG_CANCER	3/282	54/13356	0.105506	0.358427	0.298316	RB1/E2F1/E2F3	3
HPV PPIs	REACTOME_NEGATIVE_REGULATION_OF_NOTCH4_SIGNALING	REACTOME_NEGATIVE_REGULATION_OF_NOTCH4_SIGNALING	3/282	54/13356	0.105506	0.358427	0.298316	PSME2/PSME1/PSMA4	3
HPV PPIs	REACTOME_SIGNALING_BY_PTK6	REACTOME_SIGNALING_BY_PTK6	3/282	54/13356	0.105506	0.358427	0.298316	PELP1/ARHGAP35/KHDRBS1	3
HPV PPIs	REACTOME_HEDGEHOG_ON_STATE	REACTOME_HEDGEHOG_ON_STATE	4/282	86/13356	0.108566	0.358453	0.298338	PSME2/PSME1/PSMA4/CUL3	4
HPV PPIs	REACTOME_DEGRADATION_OF_AXIN	REACTOME_DEGRADATION_OF_AXIN	3/282	55/13356	0.109942	0.358453	0.298338	PSME2/PSME1/PSMA4	3
HPV PPIs	REACTOME_INTRINSIC_PATHWAY_FOR_APOPTOSIS	REACTOME_INTRINSIC_PATHWAY_FOR_APOPTOSIS	3/282	55/13356	0.109942	0.358453	0.298338	E2F1/TFDP1/TFDP2	3
HPV PPIs	REACTOME_REGULATION_OF_CHOLESTEROL_BIOSYNTHESIS_BY_SREBP_SREBF	REACTOME_REGULATION_OF_CHOLESTEROL_BIOSYNTHESIS_BY_SREBP_SREBF	3/282	55/13356	0.109942	0.358453	0.298338	DHCR7/SP1/TBL1XR1	3
HPV PPIs	REACTOME_REGULATION_OF_RUNX3_EXPRESSION_AND_ACTIVITY	REACTOME_REGULATION_OF_RUNX3_EXPRESSION_AND_ACTIVITY	3/282	55/13356	0.109942	0.358453	0.298338	PSME2/PSME1/PSMA4	3
HPV PPIs	REACTOME_SCF_BETA_TRCP_MEDIATED_DEGRADATION_OF_EMI1	REACTOME_SCF_BETA_TRCP_MEDIATED_DEGRADATION_OF_EMI1	3/282	55/13356	0.109942	0.358453	0.298338	PSME2/PSME1/PSMA4	3
HPV PPIs	REACTOME_PRE_NOTCH_EXPRESSION_AND_PROCESSING	REACTOME_PRE_NOTCH_EXPRESSION_AND_PROCESSING	5/282	120/13356	0.110312	0.358453	0.298338	E2F1/E2F3/TFDP1/PRKCI/TFDP2	5
HPV PPIs	WP_DNA_REPAIR_PATHWAYS_FULL_NETWORK	WP_DNA_REPAIR_PATHWAYS_FULL_NETWORK	5/282	120/13356	0.110312	0.358453	0.298338	WDR48/USP1/RPA1/BRCA1/MSH3	5
HPV PPIs	WP_FRAGILE_X_SYNDROME	WP_FRAGILE_X_SYNDROME	5/282	120/13356	0.110312	0.358453	0.298338	PRKACA/DICER1/AP2M1/AP2A1/AP2B1	5
HPV PPIs	KEGG_PENTOSE_PHOSPHATE_PATHWAY	KEGG_PENTOSE_PHOSPHATE_PATHWAY	2/282	27/13356	0.110496	0.358453	0.298338	PFKP/PFKM	2
HPV PPIs	REACTOME_CHOLESTEROL_BIOSYNTHESIS	REACTOME_CHOLESTEROL_BIOSYNTHESIS	2/282	27/13356	0.110496	0.358453	0.298338	DHCR7/LBR	2
HPV PPIs	REACTOME_FGFR2_ALTERNATIVE_SPLICING	REACTOME_FGFR2_ALTERNATIVE_SPLICING	2/282	27/13356	0.110496	0.358453	0.298338	POLR2E/POLR2H	2
HPV PPIs	REACTOME_RESOLUTION_OF_D_LOOP_STRUCTURES_THROUGH_SYNTHESIS_DEPENDENT_STRAND_ANNEALING_SDSA	REACTOME_RESOLUTION_OF_D_LOOP_STRUCTURES_THROUGH_SYNTHESIS_DEPENDENT_STRAND_ANNEALING_SDSA	2/282	27/13356	0.110496	0.358453	0.298338	BLM/BRCA1	2
HPV PPIs	REACTOME_SIGNALING_BY_ALK	REACTOME_SIGNALING_BY_ALK	2/282	27/13356	0.110496	0.358453	0.298338	HDAC2/HDAC3	2
HPV PPIs	WP_7OXOC_AND_7BETAHC_PATHWAYS	WP_7OXOC_AND_7BETAHC_PATHWAYS	2/282	27/13356	0.110496	0.358453	0.298338	ACOT9/DHCR7	2
HPV PPIs	WP_FGFR3_SIGNALING_IN_CHONDROCYTE_PROLIFERATION_AND_TERMINAL_DIFFERENTIATION	WP_FGFR3_SIGNALING_IN_CHONDROCYTE_PROLIFERATION_AND_TERMINAL_DIFFERENTIATION	2/282	27/13356	0.110496	0.358453	0.298338	CNP/RBL1	2
HPV PPIs	WP_FOLLICLE_STIMULATING_HORMONE_FSH_SIGNALING_PATHWAY	WP_FOLLICLE_STIMULATING_HORMONE_FSH_SIGNALING_PATHWAY	2/282	27/13356	0.110496	0.358453	0.298338	PRKACA/GRK6	2
HPV PPIs	WP_HEPATITIS_C_AND_HEPATOCELLULAR_CARCINOMA	WP_HEPATITIS_C_AND_HEPATOCELLULAR_CARCINOMA	3/282	56/13356	0.11445	0.370296	0.308195	BRCA1/CTTN/RRM2	3
HPV PPIs	REACTOME_INFLUENZA_INFECTION	REACTOME_INFLUENZA_INFECTION	6/282	157/13356	0.115514	0.371805	0.309451	POLR2E/RPL36AL/NUP88/POLR2H/KPNA4/KPNA3	6
HPV PPIs	REACTOME_RAC2_GTPASE_CYCLE	REACTOME_RAC2_GTPASE_CYCLE	4/282	88/13356	0.115524	0.371805	0.309451	ESYT1/ARHGAP35/RACGAP1/LBR	4
HPV PPIs	KEGG_HOMOLOGOUS_RECOMBINATION	KEGG_HOMOLOGOUS_RECOMBINATION	2/282	28/13356	0.117407	0.37199	0.309605	RPA1/BLM	2
HPV PPIs	PID_LIS1_PATHWAY	PID_LIS1_PATHWAY	2/282	28/13356	0.117407	0.37199	0.309605	CSNK2A1/CDK5	2
HPV PPIs	REACTOME_ATTENUATION_PHASE	REACTOME_ATTENUATION_PHASE	2/282	28/13356	0.117407	0.37199	0.309605	DNAJB1/HSPB1	2
HPV PPIs	REACTOME_RNA_POLYMERASE_III_TRANSCRIPTION_INITIATION_FROM_TYPE_1_PROMOTER	REACTOME_RNA_POLYMERASE_III_TRANSCRIPTION_INITIATION_FROM_TYPE_1_PROMOTER	2/282	28/13356	0.117407	0.37199	0.309605	POLR2E/POLR2H	2
HPV PPIs	WP_GASTRIC_CANCER_NETWORK_1	WP_GASTRIC_CANCER_NETWORK_1	2/282	28/13356	0.117407	0.37199	0.309605	APC/TPX2	2
HPV PPIs	WP_SPHINGOLIPID_METABOLISM_IN_SENESCENCE	WP_SPHINGOLIPID_METABOLISM_IN_SENESCENCE	2/282	28/13356	0.117407	0.37199	0.309605	RB1/E2F1	2
HPV PPIs	REACTOME_TRANSMISSION_ACROSS_CHEMICAL_SYNAPSES	REACTOME_TRANSMISSION_ACROSS_CHEMICAL_SYNAPSES	9/282	270/13356	0.11899	0.373408	0.310785	PPFIA1/PPFIA2/PRKACA/ARL6IP5/AP2M1/AP2A1/AP2A2/AP2B1/TUBA4A	9
HPV PPIs	REACTOME_STABILIZATION_OF_P53	REACTOME_STABILIZATION_OF_P53	3/282	57/13356	0.119026	0.373408	0.310785	PSME2/PSME1/PSMA4	3
HPV PPIs	KEGG_PROSTATE_CANCER	KEGG_PROSTATE_CANCER	4/282	89/13356	0.119075	0.373408	0.310785	HSP90B1/RB1/E2F1/E2F3	4
HPV PPIs	WP_NCRNAS_INVOLVED_IN_WNT_SIGNALING_IN_HEPATOCELLULAR_CARCINOMA	WP_NCRNAS_INVOLVED_IN_WNT_SIGNALING_IN_HEPATOCELLULAR_CARCINOMA	4/282	89/13356	0.119075	0.373408	0.310785	CSNK2A1/APC/CTBP2/CHD8	4
HPV PPIs	KEGG_RNA_POLYMERASE	KEGG_RNA_POLYMERASE	2/282	29/13356	0.124422	0.384264	0.31982	POLR2E/POLR2H	2
HPV PPIs	PID_BARD1_PATHWAY	PID_BARD1_PATHWAY	2/282	29/13356	0.124422	0.384264	0.31982	BRCA1/TOPBP1	2
HPV PPIs	REACTOME_INTERCONVERSION_OF_NUCLEOTIDE_DI_AND_TRIPHOSPHATES	REACTOME_INTERCONVERSION_OF_NUCLEOTIDE_DI_AND_TRIPHOSPHATES	2/282	29/13356	0.124422	0.384264	0.31982	TYMS/RRM2	2
HPV PPIs	REACTOME_MITOPHAGY	REACTOME_MITOPHAGY	2/282	29/13356	0.124422	0.384264	0.31982	CSNK2A1/TOMM70	2
HPV PPIs	REACTOME_MRNA_CAPPING	REACTOME_MRNA_CAPPING	2/282	29/13356	0.124422	0.384264	0.31982	POLR2E/POLR2H	2
HPV PPIs	REACTOME_PIWI_INTERACTING_RNA_PIRNA_BIOGENESIS	REACTOME_PIWI_INTERACTING_RNA_PIRNA_BIOGENESIS	2/282	29/13356	0.124422	0.384264	0.31982	POLR2E/POLR2H	2
HPV PPIs	REACTOME_B_WICH_COMPLEX_POSITIVELY_REGULATES_RRNA_EXPRESSION	REACTOME_B_WICH_COMPLEX_POSITIVELY_REGULATES_RRNA_EXPRESSION	4/282	91/13356	0.126317	0.389133	0.323873	SF3B1/POLR2E/SMARCA5/POLR2H	4
HPV PPIs	REACTOME_SARS_COV_2_ACTIVATES_MODULATES_INNATE_AND_ADAPTIVE_IMMUNE_RESPONSES	REACTOME_SARS_COV_2_ACTIVATES_MODULATES_INNATE_AND_ADAPTIVE_IMMUNE_RESPONSES	5/282	126/13356	0.128211	0.39056	0.32506	NUP88/HLA-C/HLA-A/HLA-B/TOMM70	5
HPV PPIs	WP_MRNA_PROCESSING	WP_MRNA_PROCESSING	5/282	126/13356	0.128211	0.39056	0.32506	SF3B1/SRSF5/SRPK1/U2AF2/DICER1	5
HPV PPIs	PID_ATF2_PATHWAY	PID_ATF2_PATHWAY	3/282	59/13356	0.128377	0.39056	0.32506	BRCA1/RB1/CUL3	3
HPV PPIs	REACTOME_E3_UBIQUITIN_LIGASES_UBIQUITINATE_TARGET_PROTEINS	REACTOME_E3_UBIQUITIN_LIGASES_UBIQUITINATE_TARGET_PROTEINS	3/282	59/13356	0.128377	0.39056	0.32506	HLA-A/RNF40/RNF20	3
HPV PPIs	REACTOME_METABOLISM_OF_POLYAMINES	REACTOME_METABOLISM_OF_POLYAMINES	3/282	59/13356	0.128377	0.39056	0.32506	PSME2/PSME1/PSMA4	3
HPV PPIs	REACTOME_EPH_EPHRIN_SIGNALING	REACTOME_EPH_EPHRIN_SIGNALING	4/282	92/13356	0.130006	0.393559	0.327557	AP2M1/AP2A1/AP2A2/AP2B1	4
HPV PPIs	REACTOME_UNFOLDED_PROTEIN_RESPONSE_UPR	REACTOME_UNFOLDED_PROTEIN_RESPONSE_UPR	4/282	92/13356	0.130006	0.393559	0.327557	HSP90B1/EXOSC4/CUL7/WFS1	4
HPV PPIs	PID_CDC42_REG_PATHWAY	PID_CDC42_REG_PATHWAY	2/282	30/13356	0.131536	0.394285	0.328161	APC/RACGAP1	2
HPV PPIs	PID_RETINOIC_ACID_PATHWAY	PID_RETINOIC_ACID_PATHWAY	2/282	30/13356	0.131536	0.394285	0.328161	PRKACA/HDAC3	2
HPV PPIs	REACTOME_REGULATION_OF_TP53_ACTIVITY_THROUGH_ACETYLATION	REACTOME_REGULATION_OF_TP53_ACTIVITY_THROUGH_ACETYLATION	2/282	30/13356	0.131536	0.394285	0.328161	HDAC2/MTA2	2
HPV PPIs	REACTOME_SYNTHESIS_OF_ACTIVE_UBIQUITIN_ROLES_OF_E1_AND_E2_ENZYMES	REACTOME_SYNTHESIS_OF_ACTIVE_UBIQUITIN_ROLES_OF_E1_AND_E2_ENZYMES	2/282	30/13356	0.131536	0.394285	0.328161	UBE2R2/UBE2G2	2
HPV PPIs	REACTOME_SCF_SKP2_MEDIATED_DEGRADATION_OF_P27_P21	REACTOME_SCF_SKP2_MEDIATED_DEGRADATION_OF_P27_P21	3/282	60/13356	0.133148	0.398142	0.331371	PSME2/PSME1/PSMA4	3
HPV PPIs	WP_CIRCADIAN_RHYTHM_GENES	WP_CIRCADIAN_RHYTHM_GENES	7/282	201/13356	0.133841	0.399034	0.332113	HDAC2/PPP1CB/UBE3A/NCOR1/TYMS/HDAC3/OGT	7
HPV PPIs	REACTOME_PROTEIN_LOCALIZATION	REACTOME_PROTEIN_LOCALIZATION	6/282	164/13356	0.134099	0.399034	0.332113	ATP5F1B/GET4/SGTA/IDE/TOMM70/CHCHD2	6
HPV PPIs	REACTOME_INTERFERON_GAMMA_SIGNALING	REACTOME_INTERFERON_GAMMA_SIGNALING	4/282	94/13356	0.137517	0.406569	0.338385	HLA-C/HLA-A/HLA-B/TRIM26	4
HPV PPIs	REACTOME_RAC3_GTPASE_CYCLE	REACTOME_RAC3_GTPASE_CYCLE	4/282	94/13356	0.137517	0.406569	0.338385	ESYT1/ARHGAP35/RACGAP1/LBR	4
HPV PPIs	PID_PDGFRB_PATHWAY	PID_PDGFRB_PATHWAY	5/282	129/13356	0.137629	0.406569	0.338385	LRP1/USP6NL/ARHGAP35/CTTN/KSR1	5
HPV PPIs	REACTOME_REGULATION_OF_PTEN_GENE_TRANSCRIPTION	REACTOME_REGULATION_OF_PTEN_GENE_TRANSCRIPTION	3/282	61/13356	0.13798	0.406625	0.338432	HDAC2/MTA2/HDAC3	3
HPV PPIs	REACTOME_RUNX2_REGULATES_BONE_DEVELOPMENT	REACTOME_RUNX2_REGULATES_BONE_DEVELOPMENT	2/282	31/13356	0.13874	0.406904	0.338664	RB1/HDAC3	2
HPV PPIs	REACTOME_TRANSCRIPTIONAL_REGULATION_OF_PLURIPOTENT_STEM_CELLS	REACTOME_TRANSCRIPTIONAL_REGULATION_OF_PLURIPOTENT_STEM_CELLS	2/282	31/13356	0.13874	0.406904	0.338664	ZIC3/GATA6	2
HPV PPIs	REACTOME_RECRUITMENT_OF_NUMA_TO_MITOTIC_CENTROSOMES	REACTOME_RECRUITMENT_OF_NUMA_TO_MITOTIC_CENTROSOMES	4/282	95/13356	0.141337	0.41353	0.344179	CKAP5/PRKACA/CLASP1/TUBA4A	4
HPV PPIs	REACTOME_DECTIN_1_MEDIATED_NONCANONICAL_NF_KB_SIGNALING	REACTOME_DECTIN_1_MEDIATED_NONCANONICAL_NF_KB_SIGNALING	3/282	62/13356	0.142871	0.416026	0.346256	PSME2/PSME1/PSMA4	3
HPV PPIs	REACTOME_TP53_REGULATES_TRANSCRIPTION_OF_DNA_REPAIR_GENES	REACTOME_TP53_REGULATES_TRANSCRIPTION_OF_DNA_REPAIR_GENES	3/282	62/13356	0.142871	0.416026	0.346256	POLR2E/BRCA1/POLR2H	3
HPV PPIs	WP_ADIPOGENESIS	WP_ADIPOGENESIS	5/282	131/13356	0.144073	0.418529	0.348339	NCOR1/RB1/E2F1/RBL1/SP1	5
HPV PPIs	REACTOME_DNA_DOUBLE_STRAND_BREAK_REPAIR	REACTOME_DNA_DOUBLE_STRAND_BREAK_REPAIR	6/282	168/13356	0.145319	0.421148	0.350519	RPA1/BLM/SMARCA5/NSD2/BRCA1/TOPBP1	6
HPV PPIs	REACTOME_DNA_STRAND_ELONGATION	REACTOME_DNA_STRAND_ELONGATION	2/282	32/13356	0.146028	0.422204	0.351398	RPA1/MCM5	2
HPV PPIs	KEGG_TIGHT_JUNCTION	KEGG_TIGHT_JUNCTION	5/282	132/13356	0.147343	0.425001	0.353725	CSNK2A1/PPP2R2A/CTTN/LLGL1/PRKCI	5
HPV PPIs	WP_2Q13_COPY_NUMBER_VARIATION_SYNDROME	WP_2Q13_COPY_NUMBER_VARIATION_SYNDROME	3/282	63/13356	0.147819	0.42537	0.354033	POLR2E/ANAPC1/POLR2H	3
HPV PPIs	REACTOME_ANCHORING_OF_THE_BASAL_BODY_TO_THE_PLASMA_MEMBRANE	REACTOME_ANCHORING_OF_THE_BASAL_BODY_TO_THE_PLASMA_MEMBRANE	4/282	97/13356	0.149102	0.427054	0.355434	CKAP5/PRKACA/CLASP1/TUBA4A	4
HPV PPIs	REACTOME_METABOLISM_OF_NUCLEOTIDES	REACTOME_METABOLISM_OF_NUCLEOTIDES	4/282	97/13356	0.149102	0.427054	0.355434	AMPD2/TYMS/PAICS/RRM2	4
HPV PPIs	REACTOME_ASYMMETRIC_LOCALIZATION_OF_PCP_PROTEINS	REACTOME_ASYMMETRIC_LOCALIZATION_OF_PCP_PROTEINS	3/282	64/13356	0.152822	0.430274	0.358115	PSME2/PSME1/PSMA4	3
HPV PPIs	KEGG_PYRIMIDINE_METABOLISM	KEGG_PYRIMIDINE_METABOLISM	4/282	98/13356	0.153045	0.430274	0.358115	POLR2E/TYMS/POLR2H/RRM2	4
HPV PPIs	WP_LNCRNA_IN_CANONICAL_WNT_SIGNALING_AND_COLORECTAL_CANCER	WP_LNCRNA_IN_CANONICAL_WNT_SIGNALING_AND_COLORECTAL_CANCER	4/282	98/13356	0.153045	0.430274	0.358115	CSNK2A1/APC/CTBP2/CHD8	4
HPV PPIs	BIOCARTA_AGR_PATHWAY	BIOCARTA_AGR_PATHWAY	2/282	33/13356	0.153393	0.430274	0.358115	CTTN/SP1	2
HPV PPIs	REACTOME_AMINO_ACID_TRANSPORT_ACROSS_THE_PLASMA_MEMBRANE	REACTOME_AMINO_ACID_TRANSPORT_ACROSS_THE_PLASMA_MEMBRANE	2/282	33/13356	0.153393	0.430274	0.358115	SLC7A1/SLC3A2	2
HPV PPIs	REACTOME_COOPERATION_OF_PREFOLDIN_AND_TRIC_CCT_IN_ACTIN_AND_TUBULIN_FOLDING	REACTOME_COOPERATION_OF_PREFOLDIN_AND_TRIC_CCT_IN_ACTIN_AND_TUBULIN_FOLDING	2/282	33/13356	0.153393	0.430274	0.358115	PFDN2/TUBA4A	2
HPV PPIs	REACTOME_FGFR2_MUTANT_RECEPTOR_ACTIVATION	REACTOME_FGFR2_MUTANT_RECEPTOR_ACTIVATION	2/282	33/13356	0.153393	0.430274	0.358115	POLR2E/POLR2H	2
HPV PPIs	REACTOME_FORMATION_OF_THE_EARLY_ELONGATION_COMPLEX	REACTOME_FORMATION_OF_THE_EARLY_ELONGATION_COMPLEX	2/282	33/13356	0.153393	0.430274	0.358115	POLR2E/POLR2H	2
HPV PPIs	REACTOME_HIV_ELONGATION_ARREST_AND_RECOVERY	REACTOME_HIV_ELONGATION_ARREST_AND_RECOVERY	2/282	33/13356	0.153393	0.430274	0.358115	POLR2E/POLR2H	2
HPV PPIs	REACTOME_SIGNALING_BY_NTRKS	REACTOME_SIGNALING_BY_NTRKS	5/282	134/13356	0.153977	0.430926	0.358656	AP2M1/AP2A1/AP2A2/AP2B1/CDK5	5
HPV PPIs	KEGG_GLIOMA	KEGG_GLIOMA	3/282	65/13356	0.157877	0.437833	0.364405	RB1/E2F1/E2F3	3
HPV PPIs	REACTOME_DUAL_INCISION_IN_TC_NER	REACTOME_DUAL_INCISION_IN_TC_NER	3/282	65/13356	0.157877	0.437833	0.364405	RPA1/POLR2E/POLR2H	3
HPV PPIs	REACTOME_MITOCHONDRIAL_PROTEIN_IMPORT	REACTOME_MITOCHONDRIAL_PROTEIN_IMPORT	3/282	65/13356	0.157877	0.437833	0.364405	ATP5F1B/TOMM70/CHCHD2	3
HPV PPIs	WP_PATHWAYS_AFFECTED_IN_ADENOID_CYSTIC_CARCINOMA	WP_PATHWAYS_AFFECTED_IN_ADENOID_CYSTIC_CARCINOMA	3/282	65/13356	0.157877	0.437833	0.364405	BRCA1/NCOR1/CNTN6	3
HPV PPIs	KEGG_FRUCTOSE_AND_MANNOSE_METABOLISM	KEGG_FRUCTOSE_AND_MANNOSE_METABOLISM	2/282	34/13356	0.160829	0.43807	0.364602	PFKP/PFKM	2
HPV PPIs	PID_ATM_PATHWAY	PID_ATM_PATHWAY	2/282	34/13356	0.160829	0.43807	0.364602	BLM/BRCA1	2
HPV PPIs	PID_HDAC_CLASSII_PATHWAY	PID_HDAC_CLASSII_PATHWAY	2/282	34/13356	0.160829	0.43807	0.364602	RANGAP1/HDAC3	2
HPV PPIs	REACTOME_RAF_ACTIVATION	REACTOME_RAF_ACTIVATION	2/282	34/13356	0.160829	0.43807	0.364602	PPP1CB/KSR1	2
HPV PPIs	REACTOME_SIGNALING_BY_WNT_IN_CANCER	REACTOME_SIGNALING_BY_WNT_IN_CANCER	2/282	34/13356	0.160829	0.43807	0.364602	APC/CTBP2	2
HPV PPIs	REACTOME_TELOMERE_C_STRAND_LAGGING_STRAND_SYNTHESIS	REACTOME_TELOMERE_C_STRAND_LAGGING_STRAND_SYNTHESIS	2/282	34/13356	0.160829	0.43807	0.364602	RPA1/BLM	2
HPV PPIs	WP_ALSTROM_SYNDROME	WP_ALSTROM_SYNDROME	2/282	34/13356	0.160829	0.43807	0.364602	GPRASP2/TFDP2	2
HPV PPIs	WP_FLUOROPYRIMIDINE_ACTIVITY	WP_FLUOROPYRIMIDINE_ACTIVITY	2/282	34/13356	0.160829	0.43807	0.364602	TYMS/RRM2	2
HPV PPIs	REACTOME_HCMV_EARLY_EVENTS	REACTOME_HCMV_EARLY_EVENTS	5/282	138/13356	0.16761	0.453448	0.377402	NUP88/NCOR1/TBL1XR1/HDAC3/TUBA4A	5
HPV PPIs	REACTOME_HOMOLOGY_DIRECTED_REPAIR	REACTOME_HOMOLOGY_DIRECTED_REPAIR	5/282	138/13356	0.16761	0.453448	0.377402	RPA1/BLM/NSD2/BRCA1/TOPBP1	5
HPV PPIs	PID_PI3KCI_AKT_PATHWAY	PID_PI3KCI_AKT_PATHWAY	2/282	35/13356	0.168328	0.453448	0.377402	TBC1D4/PRKACA	2
HPV PPIs	REACTOME_N_GLYCAN_TRIMMING_IN_THE_ER_AND_CALNEXIN_CALRETICULIN_CYCLE	REACTOME_N_GLYCAN_TRIMMING_IN_THE_ER_AND_CALNEXIN_CALRETICULIN_CYCLE	2/282	35/13356	0.168328	0.453448	0.377402	RNF5/DERL2	2
HPV PPIs	REACTOME_RESOLUTION_OF_D_LOOP_STRUCTURES	REACTOME_RESOLUTION_OF_D_LOOP_STRUCTURES	2/282	35/13356	0.168328	0.453448	0.377402	BLM/BRCA1	2
HPV PPIs	REACTOME_COPI_MEDIATED_ANTEROGRADE_TRANSPORT	REACTOME_COPI_MEDIATED_ANTEROGRADE_TRANSPORT	4/282	102/13356	0.169201	0.454796	0.378524	COPB2/COPA/COPB1/TUBA4A	4
HPV PPIs	REACTOME_RESPIRATORY_ELECTRON_TRANSPORT	REACTOME_RESPIRATORY_ELECTRON_TRANSPORT	4/282	103/13356	0.173331	0.461871	0.384412	NDUFA5/MT-CO1/NDUFS1/SDHB	4
HPV PPIs	REACTOME_G1_S_DNA_DAMAGE_CHECKPOINTS	REACTOME_G1_S_DNA_DAMAGE_CHECKPOINTS	3/282	68/13356	0.173343	0.461871	0.384412	PSME2/PSME1/PSMA4	3
HPV PPIs	WP_MELANOMA	WP_MELANOMA	3/282	68/13356	0.173343	0.461871	0.384412	RB1/E2F1/E2F3	3
HPV PPIs	WP_PRADERWILLI_AND_ANGELMAN_SYNDROME	WP_PRADERWILLI_AND_ANGELMAN_SYNDROME	3/282	68/13356	0.173343	0.461871	0.384412	UBE3A/RB1/E2F1	3
HPV PPIs	REACTOME_GENE_SILENCING_BY_RNA	REACTOME_GENE_SILENCING_BY_RNA	5/282	140/13356	0.174599	0.4632	0.385518	POLR2E/DGCR8/NUP88/DICER1/POLR2H	5
HPV PPIs	REACTOME_RHO_GTPASES_ACTIVATE_FORMINS	REACTOME_RHO_GTPASES_ACTIVATE_FORMINS	5/282	140/13356	0.174599	0.4632	0.385518	RANGAP1/CKAP5/RCC2/CLASP1/TUBA4A	5
HPV PPIs	KEGG_DNA_REPLICATION	KEGG_DNA_REPLICATION	2/282	36/13356	0.175886	0.464599	0.386682	RPA1/MCM5	2
HPV PPIs	REACTOME_NUCLEAR_PORE_COMPLEX_NPC_DISASSEMBLY	REACTOME_NUCLEAR_PORE_COMPLEX_NPC_DISASSEMBLY	2/282	36/13356	0.175886	0.464599	0.386682	CCNB1/NUP88	2
HPV PPIs	REACTOME_SIGNALING_BY_NUCLEAR_RECEPTORS	REACTOME_SIGNALING_BY_NUCLEAR_RECEPTORS	9/282	297/13356	0.17765	0.468246	0.389718	POLR2E/RDH11/NCOR1/SP1/USF2/TBL1XR1/POLR2H/HDAC3/HSPB1	9
HPV PPIs	PID_FRA_PATHWAY	PID_FRA_PATHWAY	2/282	37/13356	0.183497	0.479506	0.399089	SP1/USF2	2
HPV PPIs	REACTOME_INTERACTIONS_OF_REV_WITH_HOST_CELLULAR_PROTEINS	REACTOME_INTERACTIONS_OF_REV_WITH_HOST_CELLULAR_PROTEINS	2/282	37/13356	0.183497	0.479506	0.399089	RANGAP1/NUP88	2
HPV PPIs	WP_INFLUENCE_OF_LAMINOPATHIES_ON_WNT_SIGNALING	WP_INFLUENCE_OF_LAMINOPATHIES_ON_WNT_SIGNALING	2/282	37/13356	0.183497	0.479506	0.399089	APC/DICER1	2
HPV PPIs	KEGG_PANCREATIC_CANCER	KEGG_PANCREATIC_CANCER	3/282	70/13356	0.183882	0.479506	0.399089	RB1/E2F1/E2F3	3
HPV PPIs	KEGG_VIRAL_MYOCARDITIS	KEGG_VIRAL_MYOCARDITIS	3/282	70/13356	0.183882	0.479506	0.399089	HLA-C/HLA-A/HLA-B	3
HPV PPIs	WP_BRAINDERIVED_NEUROTROPHIC_FACTOR_BDNF_SIGNALING_PATHWAY	WP_BRAINDERIVED_NEUROTROPHIC_FACTOR_BDNF_SIGNALING_PATHWAY	5/282	144/13356	0.188904	0.480765	0.400138	CSNK2A1/APC/KSR1/RANBP9/CDK5	5
HPV PPIs	KEGG_MELANOMA	KEGG_MELANOMA	3/282	71/13356	0.189215	0.480765	0.400138	RB1/E2F1/E2F3	3
HPV PPIs	REACTOME_SUMOYLATION_OF_CHROMATIN_ORGANIZATION_PROTEINS	REACTOME_SUMOYLATION_OF_CHROMATIN_ORGANIZATION_PROTEINS	3/282	71/13356	0.189215	0.480765	0.400138	HDAC2/NUP88/CBX5	3
HPV PPIs	PID_P38_ALPHA_BETA_DOWNSTREAM_PATHWAY	PID_P38_ALPHA_BETA_DOWNSTREAM_PATHWAY	2/282	38/13356	0.191155	0.480765	0.400138	CSNK2A1/HSPB1	2
HPV PPIs	REACTOME_FATTY_ACYL_COA_BIOSYNTHESIS	REACTOME_FATTY_ACYL_COA_BIOSYNTHESIS	2/282	38/13356	0.191155	0.480765	0.400138	ELOVL5/SLC25A1	2
HPV PPIs	REACTOME_HSF1_DEPENDENT_TRANSACTIVATION	REACTOME_HSF1_DEPENDENT_TRANSACTIVATION	2/282	38/13356	0.191155	0.480765	0.400138	DNAJB1/HSPB1	2
HPV PPIs	REACTOME_TRANSCRIPTIONAL_REGULATION_BY_THE_AP_2_TFAP2_FAMILY_OF_TRANSCRIPTION_FACTORS	REACTOME_TRANSCRIPTIONAL_REGULATION_BY_THE_AP_2_TFAP2_FAMILY_OF_TRANSCRIPTION_FACTORS	2/282	38/13356	0.191155	0.480765	0.400138	KCTD1/KCTD15	2
HPV PPIs	REACTOME_TRIGLYCERIDE_METABOLISM	REACTOME_TRIGLYCERIDE_METABOLISM	2/282	38/13356	0.191155	0.480765	0.400138	PRKACA/PPP1CB	2
HPV PPIs	WP_G13_SIGNALING_PATHWAY	WP_G13_SIGNALING_PATHWAY	2/282	38/13356	0.191155	0.480765	0.400138	MAP3K4/PPP1CB	2
HPV PPIs	BIOCARTA_DNAFRAGMENT_PATHWAY	BIOCARTA_DNAFRAGMENT_PATHWAY	1/282	10/13356	0.192227	0.480765	0.400138	TOP2B	1
HPV PPIs	BIOCARTA_ETC_PATHWAY	BIOCARTA_ETC_PATHWAY	1/282	10/13356	0.192227	0.480765	0.400138	SDHB	1
HPV PPIs	BIOCARTA_GABA_PATHWAY	BIOCARTA_GABA_PATHWAY	1/282	10/13356	0.192227	0.480765	0.400138	UBQLN1	1
HPV PPIs	BIOCARTA_SET_PATHWAY	BIOCARTA_SET_PATHWAY	1/282	10/13356	0.192227	0.480765	0.400138	ANP32A	1
HPV PPIs	REACTOME_ATF6_ATF6_ALPHA_ACTIVATES_CHAPERONE_GENES	REACTOME_ATF6_ATF6_ALPHA_ACTIVATES_CHAPERONE_GENES	1/282	10/13356	0.192227	0.480765	0.400138	HSP90B1	1
HPV PPIs	REACTOME_MASTL_FACILITATES_MITOTIC_PROGRESSION	REACTOME_MASTL_FACILITATES_MITOTIC_PROGRESSION	1/282	10/13356	0.192227	0.480765	0.400138	CCNB1	1
HPV PPIs	REACTOME_POU5F1_OCT4_SOX2_NANOG_REPRESS_GENES_RELATED_TO_DIFFERENTIATION	REACTOME_POU5F1_OCT4_SOX2_NANOG_REPRESS_GENES_RELATED_TO_DIFFERENTIATION	1/282	10/13356	0.192227	0.480765	0.400138	GATA6	1
HPV PPIs	REACTOME_RHOBTB3_ATPASE_CYCLE	REACTOME_RHOBTB3_ATPASE_CYCLE	1/282	10/13356	0.192227	0.480765	0.400138	CUL3	1
HPV PPIs	REACTOME_ZINC_INFLUX_INTO_CELLS_BY_THE_SLC39_GENE_FAMILY	REACTOME_ZINC_INFLUX_INTO_CELLS_BY_THE_SLC39_GENE_FAMILY	1/282	10/13356	0.192227	0.480765	0.400138	SLC39A7	1
HPV PPIs	WP_MAMMARY_GLAND_DEVELOPMENT_PATHWAY_INVOLUTION_STAGE_4_OF_4	WP_MAMMARY_GLAND_DEVELOPMENT_PATHWAY_INVOLUTION_STAGE_4_OF_4	1/282	10/13356	0.192227	0.480765	0.400138	E2F1	1
HPV PPIs	WP_VITAMIN_D_METABOLISM	WP_VITAMIN_D_METABOLISM	1/282	10/13356	0.192227	0.480765	0.400138	DHCR7	1
HPV PPIs	WP_NONSMALL_CELL_LUNG_CANCER	WP_NONSMALL_CELL_LUNG_CANCER	3/282	72/13356	0.194587	0.485672	0.404222	RB1/E2F1/E2F3	3
HPV PPIs	PID_ATR_PATHWAY	PID_ATR_PATHWAY	2/282	39/13356	0.198854	0.494306	0.411407	RPA1/TOPBP1	2
HPV PPIs	REACTOME_TRANSLESION_SYNTHESIS_BY_Y_FAMILY_DNA_POLYMERASES_BYPASSES_LESIONS_ON_DNA_TEMPLATE	REACTOME_TRANSLESION_SYNTHESIS_BY_Y_FAMILY_DNA_POLYMERASES_BYPASSES_LESIONS_ON_DNA_TEMPLATE	2/282	39/13356	0.198854	0.494306	0.411407	RPA1/UFD1	2
HPV PPIs	REACTOME_INTERFERON_ALPHA_BETA_SIGNALING	REACTOME_INTERFERON_ALPHA_BETA_SIGNALING	3/282	73/13356	0.199996	0.495131	0.412095	HLA-C/HLA-A/HLA-B	3
HPV PPIs	REACTOME_REGULATION_OF_RUNX2_EXPRESSION_AND_ACTIVITY	REACTOME_REGULATION_OF_RUNX2_EXPRESSION_AND_ACTIVITY	3/282	73/13356	0.199996	0.495131	0.412095	PSME2/PSME1/PSMA4	3
HPV PPIs	REACTOME_INTRACELLULAR_SIGNALING_BY_SECOND_MESSENGERS	REACTOME_INTRACELLULAR_SIGNALING_BY_SECOND_MESSENGERS	9/282	307/13356	0.202226	0.498964	0.415284	CSNK2A1/HDAC2/PRKACA/MTA2/PSME2/PSME1/PSMA4/PIP5K1A/HDAC3	9
HPV PPIs	REACTOME_RHOC_GTPASE_CYCLE	REACTOME_RHOC_GTPASE_CYCLE	3/282	74/13356	0.205441	0.498964	0.415284	ARHGAP35/RACGAP1/LBR	3
HPV PPIs	WP_ATM_SIGNALING_PATHWAY	WP_ATM_SIGNALING_PATHWAY	2/282	40/13356	0.20659	0.498964	0.415284	CCNB1/BRCA1	2
HPV PPIs	WP_BLADDER_CANCER	WP_BLADDER_CANCER	2/282	40/13356	0.20659	0.498964	0.415284	RB1/E2F1	2
HPV PPIs	BIOCARTA_AKAP95_PATHWAY	BIOCARTA_AKAP95_PATHWAY	1/282	11/13356	0.209296	0.498964	0.415284	CCNB1	1
HPV PPIs	BIOCARTA_BTG2_PATHWAY	BIOCARTA_BTG2_PATHWAY	1/282	11/13356	0.209296	0.498964	0.415284	RB1	1
HPV PPIs	BIOCARTA_NPC_PATHWAY	BIOCARTA_NPC_PATHWAY	1/282	11/13356	0.209296	0.498964	0.415284	RANGAP1	1
HPV PPIs	BIOCARTA_PTC1_PATHWAY	BIOCARTA_PTC1_PATHWAY	1/282	11/13356	0.209296	0.498964	0.415284	CCNB1	1
HPV PPIs	BIOCARTA_RANBP2_PATHWAY	BIOCARTA_RANBP2_PATHWAY	1/282	11/13356	0.209296	0.498964	0.415284	RANGAP1	1
HPV PPIs	BIOCARTA_SRCRPTP_PATHWAY	BIOCARTA_SRCRPTP_PATHWAY	1/282	11/13356	0.209296	0.498964	0.415284	CCNB1	1
HPV PPIs	KEGG_VALINE_LEUCINE_AND_ISOLEUCINE_BIOSYNTHESIS	KEGG_VALINE_LEUCINE_AND_ISOLEUCINE_BIOSYNTHESIS	1/282	11/13356	0.209296	0.498964	0.415284	IARS2	1
HPV PPIs	PID_RANBP2_PATHWAY	PID_RANBP2_PATHWAY	1/282	11/13356	0.209296	0.498964	0.415284	RANGAP1	1
HPV PPIs	REACTOME_DERMATAN_SULFATE_BIOSYNTHESIS	REACTOME_DERMATAN_SULFATE_BIOSYNTHESIS	1/282	11/13356	0.209296	0.498964	0.415284	DSEL	1
HPV PPIs	REACTOME_PURINE_RIBONUCLEOSIDE_MONOPHOSPHATE_BIOSYNTHESIS	REACTOME_PURINE_RIBONUCLEOSIDE_MONOPHOSPHATE_BIOSYNTHESIS	1/282	11/13356	0.209296	0.498964	0.415284	PAICS	1
HPV PPIs	REACTOME_RECEPTOR_MEDIATED_MITOPHAGY	REACTOME_RECEPTOR_MEDIATED_MITOPHAGY	1/282	11/13356	0.209296	0.498964	0.415284	CSNK2A1	1
HPV PPIs	REACTOME_SYNTHESIS_OF_PIPS_AT_THE_LATE_ENDOSOME_MEMBRANE	REACTOME_SYNTHESIS_OF_PIPS_AT_THE_LATE_ENDOSOME_MEMBRANE	1/282	11/13356	0.209296	0.498964	0.415284	VAC14	1
HPV PPIs	WP_GLYCOLYSIS_IN_SENESCENCE	WP_GLYCOLYSIS_IN_SENESCENCE	1/282	11/13356	0.209296	0.498964	0.415284	RB1	1
HPV PPIs	WP_SEROTONIN_TRANSPORTER_ACTIVITY	WP_SEROTONIN_TRANSPORTER_ACTIVITY	1/282	11/13356	0.209296	0.498964	0.415284	SCAMP2	1
HPV PPIs	WP_SMC1SMC3_ROLE_IN_DNA_DAMAGE_CORNELIA_DE_LANGE_SYNDROME	WP_SMC1SMC3_ROLE_IN_DNA_DAMAGE_CORNELIA_DE_LANGE_SYNDROME	1/282	11/13356	0.209296	0.498964	0.415284	BRCA1	1
HPV PPIs	REACTOME_CELLULAR_RESPONSE_TO_HYPOXIA	REACTOME_CELLULAR_RESPONSE_TO_HYPOXIA	3/282	75/13356	0.210919	0.501856	0.417691	PSME2/PSME1/PSMA4	3
HPV PPIs	REACTOME_TRANSCRIPTIONAL_REGULATION_BY_VENTX	REACTOME_TRANSCRIPTIONAL_REGULATION_BY_VENTX	2/282	41/13356	0.214357	0.508059	0.422854	CDC23/ANAPC1	2
HPV PPIs	WP_COMMON_PATHWAYS_UNDERLYING_DRUG_ADDICTION	WP_COMMON_PATHWAYS_UNDERLYING_DRUG_ADDICTION	2/282	41/13356	0.214357	0.508059	0.422854	PRKACA/PPP1CB	2
HPV PPIs	REACTOME_AUTOPHAGY	REACTOME_AUTOPHAGY	5/282	151/13356	0.214891	0.508339	0.423088	CSNK2A1/MTMR3/MTMR14/TUBA4A/TOMM70	5
HPV PPIs	REACTOME_SRP_DEPENDENT_COTRANSLATIONAL_PROTEIN_TARGETING_TO_MEMBRANE	REACTOME_SRP_DEPENDENT_COTRANSLATIONAL_PROTEIN_TARGETING_TO_MEMBRANE	4/282	113/13356	0.216384	0.510006	0.424475	RPL36AL/RPN2/DDOST/RPN1	4
HPV PPIs	WP_LEPTIN_SIGNALING_PATHWAY	WP_LEPTIN_SIGNALING_PATHWAY	3/282	76/13356	0.216429	0.510006	0.424475	SP1/KPNA4/KHDRBS1	3
HPV PPIs	WP_WNT_SIGNALING	WP_WNT_SIGNALING	4/282	114/13356	0.220845	0.512665	0.426687	CSNK2A1/APC/CTBP2/CHD8	4
HPV PPIs	PID_UPA_UPAR_PATHWAY	PID_UPA_UPAR_PATHWAY	2/282	42/13356	0.222151	0.512665	0.426687	LRP1/VTN	2
HPV PPIs	REACTOME_DEACTIVATION_OF_THE_BETA_CATENIN_TRANSACTIVATING_COMPLEX	REACTOME_DEACTIVATION_OF_THE_BETA_CATENIN_TRANSACTIVATING_COMPLEX	2/282	42/13356	0.222151	0.512665	0.426687	APC/CHD8	2
HPV PPIs	REACTOME_RND1_GTPASE_CYCLE	REACTOME_RND1_GTPASE_CYCLE	2/282	42/13356	0.222151	0.512665	0.426687	ARHGAP35/RASAL2	2
HPV PPIs	REACTOME_RND3_GTPASE_CYCLE	REACTOME_RND3_GTPASE_CYCLE	2/282	42/13356	0.222151	0.512665	0.426687	ARHGAP35/RASAL2	2
HPV PPIs	WP_EUKARYOTIC_TRANSCRIPTION_INITIATION	WP_EUKARYOTIC_TRANSCRIPTION_INITIATION	2/282	42/13356	0.222151	0.512665	0.426687	POLR2E/POLR2H	2
HPV PPIs	WP_METABOLIC_REPROGRAMMING_IN_COLON_CANCER	WP_METABOLIC_REPROGRAMMING_IN_COLON_CANCER	2/282	42/13356	0.222151	0.512665	0.426687	SDHB/PAICS	2
HPV PPIs	REACTOME_CHROMATIN_MODIFYING_ENZYMES	REACTOME_CHROMATIN_MODIFYING_ENZYMES	8/282	274/13356	0.22358	0.512665	0.426687	HDAC2/MTA2/NSD2/JMJD6/NCOR1/TBL1XR1/HDAC3/OGT	8
HPV PPIs	BIOCARTA_PRION_PATHWAY	BIOCARTA_PRION_PATHWAY	1/282	12/13356	0.226004	0.512665	0.426687	DNAJB1	1
HPV PPIs	REACTOME_ALK_MUTANTS_BIND_TKIS	REACTOME_ALK_MUTANTS_BIND_TKIS	1/282	12/13356	0.226004	0.512665	0.426687	BIRC6	1
HPV PPIs	REACTOME_ATF6_ATF6_ALPHA_ACTIVATES_CHAPERONES	REACTOME_ATF6_ATF6_ALPHA_ACTIVATES_CHAPERONES	1/282	12/13356	0.226004	0.512665	0.426687	HSP90B1	1
HPV PPIs	REACTOME_CREB1_PHOSPHORYLATION_THROUGH_THE_ACTIVATION_OF_ADENYLATE_CYCLASE	REACTOME_CREB1_PHOSPHORYLATION_THROUGH_THE_ACTIVATION_OF_ADENYLATE_CYCLASE	1/282	12/13356	0.226004	0.512665	0.426687	PRKACA	1
HPV PPIs	REACTOME_GAP_JUNCTION_DEGRADATION	REACTOME_GAP_JUNCTION_DEGRADATION	1/282	12/13356	0.226004	0.512665	0.426687	AP2M1	1
HPV PPIs	REACTOME_GP1B_IX_V_ACTIVATION_SIGNALLING	REACTOME_GP1B_IX_V_ACTIVATION_SIGNALLING	1/282	12/13356	0.226004	0.512665	0.426687	FLNA	1
HPV PPIs	REACTOME_REGULATION_OF_GLYCOLYSIS_BY_FRUCTOSE_2_6_BISPHOSPHATE_METABOLISM	REACTOME_REGULATION_OF_GLYCOLYSIS_BY_FRUCTOSE_2_6_BISPHOSPHATE_METABOLISM	1/282	12/13356	0.226004	0.512665	0.426687	PRKACA	1
HPV PPIs	REACTOME_UNWINDING_OF_DNA	REACTOME_UNWINDING_OF_DNA	1/282	12/13356	0.226004	0.512665	0.426687	MCM5	1
HPV PPIs	REACTOME_VITAMIN_D_CALCIFEROL_METABOLISM	REACTOME_VITAMIN_D_CALCIFEROL_METABOLISM	1/282	12/13356	0.226004	0.512665	0.426687	LRP2	1
HPV PPIs	WP_AEROBIC_GLYCOLYSIS	WP_AEROBIC_GLYCOLYSIS	1/282	12/13356	0.226004	0.512665	0.426687	PFKM	1
HPV PPIs	WP_VITAMIN_K_METABOLISM_AND_ACTIVATION_OF_DEPENDENT_PROTEINS	WP_VITAMIN_K_METABOLISM_AND_ACTIVATION_OF_DEPENDENT_PROTEINS	1/282	12/13356	0.226004	0.512665	0.426687	VKORC1L1	1
HPV PPIs	REACTOME_TCF_DEPENDENT_SIGNALING_IN_RESPONSE_TO_WNT	REACTOME_TCF_DEPENDENT_SIGNALING_IN_RESPONSE_TO_WNT	7/282	234/13356	0.226155	0.512665	0.426687	CSNK2A1/APC/PSME2/PSME1/PSMA4/CUL3/CHD8	7
HPV PPIs	REACTOME_METABOLISM_OF_STEROIDS	REACTOME_METABOLISM_OF_STEROIDS	5/282	154/13356	0.226361	0.512665	0.426687	LRP2/DHCR7/SP1/TBL1XR1/LBR	5
HPV PPIs	REACTOME_DNA_DOUBLE_STRAND_BREAK_RESPONSE	REACTOME_DNA_DOUBLE_STRAND_BREAK_RESPONSE	3/282	78/13356	0.227538	0.51438	0.428115	SMARCA5/NSD2/BRCA1	3
HPV PPIs	REACTOME_HIV_TRANSCRIPTION_ELONGATION	REACTOME_HIV_TRANSCRIPTION_ELONGATION	2/282	43/13356	0.229967	0.517955	0.431091	POLR2E/POLR2H	2
HPV PPIs	REACTOME_SIGNALING_BY_FGFR2_IN_DISEASE	REACTOME_SIGNALING_BY_FGFR2_IN_DISEASE	2/282	43/13356	0.229967	0.517955	0.431091	POLR2E/POLR2H	2
HPV PPIs	PID_P73PATHWAY	PID_P73PATHWAY	3/282	79/13356	0.233133	0.52316	0.435422	CCNB1/RB1/SP1	3
HPV PPIs	REACTOME_NUCLEAR_EVENTS_MEDIATED_BY_NFE2L2	REACTOME_NUCLEAR_EVENTS_MEDIATED_BY_NFE2L2	3/282	79/13356	0.233133	0.52316	0.435422	PSME2/PSME1/PSMA4	3
HPV PPIs	WP_FAS_LIGAND_PATHWAY_AND_STRESS_INDUCTION_OF_HEAT_SHOCK_PROTEINS	WP_FAS_LIGAND_PATHWAY_AND_STRESS_INDUCTION_OF_HEAT_SHOCK_PROTEINS	2/282	44/13356	0.237801	0.524616	0.436634	RB1/HSPB1	2
HPV PPIs	REACTOME_REGULATION_OF_LIPID_METABOLISM_BY_PPARALPHA	REACTOME_REGULATION_OF_LIPID_METABOLISM_BY_PPARALPHA	4/282	118/13356	0.238919	0.524616	0.436634	NCOR1/SP1/TBL1XR1/HDAC3	4
HPV PPIs	BIOCARTA_CDK5_PATHWAY	BIOCARTA_CDK5_PATHWAY	1/282	13/13356	0.242361	0.524616	0.436634	CDK5	1
HPV PPIs	BIOCARTA_CTL_PATHWAY	BIOCARTA_CTL_PATHWAY	1/282	13/13356	0.242361	0.524616	0.436634	HLA-A	1
HPV PPIs	BIOCARTA_RB_PATHWAY	BIOCARTA_RB_PATHWAY	1/282	13/13356	0.242361	0.524616	0.436634	RB1	1
HPV PPIs	REACTOME_ADVANCED_GLYCOSYLATION_ENDPRODUCT_RECEPTOR_SIGNALING	REACTOME_ADVANCED_GLYCOSYLATION_ENDPRODUCT_RECEPTOR_SIGNALING	1/282	13/13356	0.242361	0.524616	0.436634	DDOST	1
HPV PPIs	REACTOME_ALPHA_LINOLENIC_OMEGA3_AND_LINOLEIC_OMEGA6_ACID_METABOLISM	REACTOME_ALPHA_LINOLENIC_OMEGA3_AND_LINOLEIC_OMEGA6_ACID_METABOLISM	1/282	13/13356	0.242361	0.524616	0.436634	ELOVL5	1
HPV PPIs	REACTOME_CHK1_CHK2_CDS1_MEDIATED_INACTIVATION_OF_CYCLIN_B_CDK1_COMPLEX	REACTOME_CHK1_CHK2_CDS1_MEDIATED_INACTIVATION_OF_CYCLIN_B_CDK1_COMPLEX	1/282	13/13356	0.242361	0.524616	0.436634	CCNB1	1
HPV PPIs	REACTOME_MITOTIC_TELOPHASE_CYTOKINESIS	REACTOME_MITOTIC_TELOPHASE_CYTOKINESIS	1/282	13/13356	0.242361	0.524616	0.436634	KIF23	1
HPV PPIs	REACTOME_P75NTR_RECRUITS_SIGNALLING_COMPLEXES	REACTOME_P75NTR_RECRUITS_SIGNALLING_COMPLEXES	1/282	13/13356	0.242361	0.524616	0.436634	PRKCI	1
HPV PPIs	REACTOME_POU5F1_OCT4_SOX2_NANOG_ACTIVATE_GENES_RELATED_TO_PROLIFERATION	REACTOME_POU5F1_OCT4_SOX2_NANOG_ACTIVATE_GENES_RELATED_TO_PROLIFERATION	1/282	13/13356	0.242361	0.524616	0.436634	ZIC3	1
HPV PPIs	REACTOME_PURINE_SALVAGE	REACTOME_PURINE_SALVAGE	1/282	13/13356	0.242361	0.524616	0.436634	AMPD2	1
HPV PPIs	REACTOME_TRAFFICKING_AND_PROCESSING_OF_ENDOSOMAL_TLR	REACTOME_TRAFFICKING_AND_PROCESSING_OF_ENDOSOMAL_TLR	1/282	13/13356	0.242361	0.524616	0.436634	HSP90B1	1
HPV PPIs	SA_REG_CASCADE_OF_CYCLIN_EXPR	SA_REG_CASCADE_OF_CYCLIN_EXPR	1/282	13/13356	0.242361	0.524616	0.436634	E2F1	1
HPV PPIs	WP_DISORDERS_OF_FOLATE_METABOLISM_AND_TRANSPORT	WP_DISORDERS_OF_FOLATE_METABOLISM_AND_TRANSPORT	1/282	13/13356	0.242361	0.524616	0.436634	TYMS	1
HPV PPIs	WP_DOPAMINE_METABOLISM	WP_DOPAMINE_METABOLISM	1/282	13/13356	0.242361	0.524616	0.436634	PRKACA	1
HPV PPIs	WP_ESTROGEN_RECEPTOR_PATHWAY	WP_ESTROGEN_RECEPTOR_PATHWAY	1/282	13/13356	0.242361	0.524616	0.436634	SP1	1
HPV PPIs	WP_FAMILIAL_HYPERLIPIDEMIA_TYPE_3	WP_FAMILIAL_HYPERLIPIDEMIA_TYPE_3	1/282	13/13356	0.242361	0.524616	0.436634	LRP1	1
HPV PPIs	WP_HOMOLOGOUS_RECOMBINATION	WP_HOMOLOGOUS_RECOMBINATION	1/282	13/13356	0.242361	0.524616	0.436634	RPA1	1
HPV PPIs	WP_NEUROINFLAMMATION	WP_NEUROINFLAMMATION	1/282	13/13356	0.242361	0.524616	0.436634	MT-CO1	1
HPV PPIs	REACTOME_DOWNSTREAM_SIGNALING_EVENTS_OF_B_CELL_RECEPTOR_BCR	REACTOME_DOWNSTREAM_SIGNALING_EVENTS_OF_B_CELL_RECEPTOR_BCR	3/282	81/13356	0.244396	0.527527	0.439057	PSME2/PSME1/PSMA4	3
HPV PPIs	PID_NFAT_TFPATHWAY	PID_NFAT_TFPATHWAY	2/282	45/13356	0.245648	0.527527	0.439057	SLC3A2/E2F1	2
HPV PPIs	REACTOME_DAP12_INTERACTIONS	REACTOME_DAP12_INTERACTIONS	2/282	45/13356	0.245648	0.527527	0.439057	HLA-C/HLA-B	2
HPV PPIs	WP_GLYCOLYSIS_AND_GLUCONEOGENESIS	WP_GLYCOLYSIS_AND_GLUCONEOGENESIS	2/282	45/13356	0.245648	0.527527	0.439057	PFKP/PFKM	2
HPV PPIs	KEGG_PURINE_METABOLISM	KEGG_PURINE_METABOLISM	5/282	159/13356	0.245863	0.527527	0.439057	POLR2E/AMPD2/PAICS/POLR2H/RRM2	5
HPV PPIs	REACTOME_RHO_GTPASE_EFFECTORS	REACTOME_RHO_GTPASE_EFFECTORS	9/282	324/13356	0.246965	0.528963	0.440253	RANGAP1/FLNA/CKAP5/RCC2/CLASP1/PPP1CB/PRC1/CTTN/TUBA4A	9
HPV PPIs	PID_REG_GR_PATHWAY	PID_REG_GR_PATHWAY	3/282	82/13356	0.25006	0.531077	0.442012	HDAC2/PRKACA/CDK5	3
HPV PPIs	REACTOME_ONCOGENIC_MAPK_SIGNALING	REACTOME_ONCOGENIC_MAPK_SIGNALING	3/282	82/13356	0.25006	0.531077	0.442012	PPP1CB/KSR1/AP3B1	3
HPV PPIs	REACTOME_SELECTIVE_AUTOPHAGY	REACTOME_SELECTIVE_AUTOPHAGY	3/282	82/13356	0.25006	0.531077	0.442012	CSNK2A1/TUBA4A/TOMM70	3
HPV PPIs	REACTOME_SIGNALING_BY_NOTCH4	REACTOME_SIGNALING_BY_NOTCH4	3/282	82/13356	0.25006	0.531077	0.442012	PSME2/PSME1/PSMA4	3
HPV PPIs	PID_PS1_PATHWAY	PID_PS1_PATHWAY	2/282	46/13356	0.253506	0.531077	0.442012	CSNK2A1/APC	2
HPV PPIs	REACTOME_TGF_BETA_RECEPTOR_SIGNALING_ACTIVATES_SMADS	REACTOME_TGF_BETA_RECEPTOR_SIGNALING_ACTIVATES_SMADS	2/282	46/13356	0.253506	0.531077	0.442012	PPP1CB/UCHL5	2
HPV PPIs	WP_2586_ARYL_HYDROCARBON_RECEPTOR_PATHWAY	WP_2586_ARYL_HYDROCARBON_RECEPTOR_PATHWAY	2/282	46/13356	0.253506	0.531077	0.442012	RB1/E2F1	2
HPV PPIs	WP_ENVELOPE_PROTEINS_AND_THEIR_POTENTIAL_ROLES_IN_EDMD_PHYSIOPATHOLOGY	WP_ENVELOPE_PROTEINS_AND_THEIR_POTENTIAL_ROLES_IN_EDMD_PHYSIOPATHOLOGY	2/282	46/13356	0.253506	0.531077	0.442012	TMEM43/LBR	2
HPV PPIs	WP_OXYSTEROLS_DERIVED_FROM_CHOLESTEROL	WP_OXYSTEROLS_DERIVED_FROM_CHOLESTEROL	2/282	46/13356	0.253506	0.531077	0.442012	ACOT9/DHCR7	2
HPV PPIs	WP_TRANSLATION_INHIBITORS_IN_CHRONICALLY_ACTIVATED_PDGFRA_CELLS	WP_TRANSLATION_INHIBITORS_IN_CHRONICALLY_ACTIVATED_PDGFRA_CELLS	2/282	46/13356	0.253506	0.531077	0.442012	CSNK2A1/PRKACA	2
HPV PPIs	REACTOME_ACTIVATION_OF_ANTERIOR_HOX_GENES_IN_HINDBRAIN_DEVELOPMENT_DURING_EARLY_EMBRYOGENESIS	REACTOME_ACTIVATION_OF_ANTERIOR_HOX_GENES_IN_HINDBRAIN_DEVELOPMENT_DURING_EARLY_EMBRYOGENESIS	4/282	122/13356	0.257325	0.531077	0.442012	POLR2E/NCOR1/POLR2H/HDAC3	4
HPV PPIs	REACTOME_HCMV_INFECTION	REACTOME_HCMV_INFECTION	5/282	162/13356	0.257771	0.531077	0.442012	NUP88/NCOR1/TBL1XR1/HDAC3/TUBA4A	5
HPV PPIs	BIOCARTA_HSP27_PATHWAY	BIOCARTA_HSP27_PATHWAY	1/282	14/13356	0.258374	0.531077	0.442012	HSPB1	1
HPV PPIs	BIOCARTA_MHC_PATHWAY	BIOCARTA_MHC_PATHWAY	1/282	14/13356	0.258374	0.531077	0.442012	HLA-A	1
HPV PPIs	BIOCARTA_PRC2_PATHWAY	BIOCARTA_PRC2_PATHWAY	1/282	14/13356	0.258374	0.531077	0.442012	HDAC2	1
HPV PPIs	BIOCARTA_PS1_PATHWAY	BIOCARTA_PS1_PATHWAY	1/282	14/13356	0.258374	0.531077	0.442012	APC	1
HPV PPIs	REACTOME_GLUTAMATE_AND_GLUTAMINE_METABOLISM	REACTOME_GLUTAMATE_AND_GLUTAMINE_METABOLISM	1/282	14/13356	0.258374	0.531077	0.442012	ALDH18A1	1
HPV PPIs	REACTOME_GOLGI_CISTERNAE_PERICENTRIOLAR_STACK_REORGANIZATION	REACTOME_GOLGI_CISTERNAE_PERICENTRIOLAR_STACK_REORGANIZATION	1/282	14/13356	0.258374	0.531077	0.442012	CCNB1	1
HPV PPIs	REACTOME_NUCLEOTIDE_BIOSYNTHESIS	REACTOME_NUCLEOTIDE_BIOSYNTHESIS	1/282	14/13356	0.258374	0.531077	0.442012	PAICS	1
HPV PPIs	REACTOME_PTK6_REGULATES_RHO_GTPASES_RAS_GTPASE_AND_MAP_KINASES	REACTOME_PTK6_REGULATES_RHO_GTPASES_RAS_GTPASE_AND_MAP_KINASES	1/282	14/13356	0.258374	0.531077	0.442012	ARHGAP35	1
HPV PPIs	REACTOME_REPRESSION_OF_WNT_TARGET_GENES	REACTOME_REPRESSION_OF_WNT_TARGET_GENES	1/282	14/13356	0.258374	0.531077	0.442012	CTBP2	1
HPV PPIs	REACTOME_TP53_REGULATES_TRANSCRIPTION_OF_GENES_INVOLVED_IN_G1_CELL_CYCLE_ARREST	REACTOME_TP53_REGULATES_TRANSCRIPTION_OF_GENES_INVOLVED_IN_G1_CELL_CYCLE_ARREST	1/282	14/13356	0.258374	0.531077	0.442012	E2F1	1
HPV PPIs	REACTOME_TRYPTOPHAN_CATABOLISM	REACTOME_TRYPTOPHAN_CATABOLISM	1/282	14/13356	0.258374	0.531077	0.442012	SLC3A2	1
HPV PPIs	WP_OMEGA9_FATTY_ACID_SYNTHESIS	WP_OMEGA9_FATTY_ACID_SYNTHESIS	1/282	14/13356	0.258374	0.531077	0.442012	ELOVL5	1
HPV PPIs	REACTOME_HIV_TRANSCRIPTION_INITIATION	REACTOME_HIV_TRANSCRIPTION_INITIATION	2/282	47/13356	0.261368	0.533801	0.444279	POLR2E/POLR2H	2
HPV PPIs	KEGG_SMALL_CELL_LUNG_CANCER	KEGG_SMALL_CELL_LUNG_CANCER	3/282	84/13356	0.261445	0.533801	0.444279	RB1/E2F1/E2F3	3
HPV PPIs	REACTOME_TRANSCRIPTIONAL_REGULATION_OF_WHITE_ADIPOCYTE_DIFFERENTIATION	REACTOME_TRANSCRIPTIONAL_REGULATION_OF_WHITE_ADIPOCYTE_DIFFERENTIATION	3/282	84/13356	0.261445	0.533801	0.444279	NCOR1/TBL1XR1/HDAC3	3
HPV PPIs	REACTOME_TRANSPORT_OF_MATURE_TRANSCRIPT_TO_CYTOPLASM	REACTOME_TRANSPORT_OF_MATURE_TRANSCRIPT_TO_CYTOPLASM	3/282	84/13356	0.261445	0.533801	0.444279	SRSF5/U2AF2/NUP88	3
HPV PPIs	REACTOME_NEUROTRANSMITTER_RECEPTORS_AND_POSTSYNAPTIC_SIGNAL_TRANSMISSION	REACTOME_NEUROTRANSMITTER_RECEPTORS_AND_POSTSYNAPTIC_SIGNAL_TRANSMISSION	6/282	205/13356	0.265949	0.542093	0.45118	PRKACA/AP2M1/AP2A1/AP2A2/AP2B1/TUBA4A	6
HPV PPIs	PID_HEDGEHOG_GLI_PATHWAY	PID_HEDGEHOG_GLI_PATHWAY	2/282	48/13356	0.269233	0.544094	0.452846	HDAC2/PRKACA	2
HPV PPIs	WP_EXERCISEINDUCED_CIRCADIAN_REGULATION	WP_EXERCISEINDUCED_CIRCADIAN_REGULATION	2/282	48/13356	0.269233	0.544094	0.452846	ZFR/PSMA4	2
HPV PPIs	WP_RETT_SYNDROME_CAUSING_GENES	WP_RETT_SYNDROME_CAUSING_GENES	2/282	48/13356	0.269233	0.544094	0.452846	NCOR1/TBL1XR1	2
HPV PPIs	KEGG_TGF_BETA_SIGNALING_PATHWAY	KEGG_TGF_BETA_SIGNALING_PATHWAY	3/282	86/13356	0.272895	0.544094	0.452846	TFDP1/RBL1/SP1	3
HPV PPIs	WP_CLEAR_CELL_RENAL_CELL_CARCINOMA_PATHWAYS	WP_CLEAR_CELL_RENAL_CELL_CARCINOMA_PATHWAYS	3/282	86/13356	0.272895	0.544094	0.452846	PFKP/KSR1/PFKM	3
HPV PPIs	PID_ARF6_DOWNSTREAM_PATHWAY	PID_ARF6_DOWNSTREAM_PATHWAY	1/282	15/13356	0.274049	0.544094	0.452846	PIP5K1A	1
HPV PPIs	PID_ERB_GENOMIC_PATHWAY	PID_ERB_GENOMIC_PATHWAY	1/282	15/13356	0.274049	0.544094	0.452846	DDX54	1
HPV PPIs	PID_LPA4_PATHWAY	PID_LPA4_PATHWAY	1/282	15/13356	0.274049	0.544094	0.452846	PRKACA	1
HPV PPIs	REACTOME_DEPOLYMERISATION_OF_THE_NUCLEAR_LAMINA	REACTOME_DEPOLYMERISATION_OF_THE_NUCLEAR_LAMINA	1/282	15/13356	0.274049	0.544094	0.452846	CCNB1	1
HPV PPIs	REACTOME_MATURATION_OF_SARSCOV2_NUCLEOPROTEIN	REACTOME_MATURATION_OF_SARSCOV2_NUCLEOPROTEIN	1/282	15/13356	0.274049	0.544094	0.452846	SRPK1	1
HPV PPIs	REACTOME_PROCESSIVE_SYNTHESIS_ON_THE_LAGGING_STRAND	REACTOME_PROCESSIVE_SYNTHESIS_ON_THE_LAGGING_STRAND	1/282	15/13356	0.274049	0.544094	0.452846	RPA1	1
HPV PPIs	REACTOME_SIGNALING_BY_CTNNB1_PHOSPHO_SITE_MUTANTS	REACTOME_SIGNALING_BY_CTNNB1_PHOSPHO_SITE_MUTANTS	1/282	15/13356	0.274049	0.544094	0.452846	APC	1
HPV PPIs	SA_G1_AND_S_PHASES	SA_G1_AND_S_PHASES	1/282	15/13356	0.274049	0.544094	0.452846	E2F1	1
HPV PPIs	WP_CHOLESTEROL_BIOSYNTHESIS_PATHWAY	WP_CHOLESTEROL_BIOSYNTHESIS_PATHWAY	1/282	15/13356	0.274049	0.544094	0.452846	DHCR7	1
HPV PPIs	WP_FAMILIAL_HYPERLIPIDEMIA_TYPE_5	WP_FAMILIAL_HYPERLIPIDEMIA_TYPE_5	1/282	15/13356	0.274049	0.544094	0.452846	LRP1	1
HPV PPIs	WP_OMEGA3_OMEGA6_FATTY_ACID_SYNTHESIS	WP_OMEGA3_OMEGA6_FATTY_ACID_SYNTHESIS	1/282	15/13356	0.274049	0.544094	0.452846	ELOVL5	1
HPV PPIs	REACTOME_OXIDATIVE_STRESS_INDUCED_SENESCENCE	REACTOME_OXIDATIVE_STRESS_INDUCED_SENESCENCE	4/282	126/13356	0.276003	0.547084	0.455335	E2F1/E2F3/TFDP1/TFDP2	4
HPV PPIs	REACTOME_RETROGRADE_TRANSPORT_AT_THE_TRANS_GOLGI_NETWORK	REACTOME_RETROGRADE_TRANSPORT_AT_THE_TRANS_GOLGI_NETWORK	2/282	49/13356	0.277096	0.547477	0.455661	ARL1/USP6NL	2
HPV PPIs	WP_PHOSPHOINOSITIDES_METABOLISM	WP_PHOSPHOINOSITIDES_METABOLISM	2/282	49/13356	0.277096	0.547477	0.455661	MTMR3/PIP5K1A	2
HPV PPIs	REACTOME_MEIOTIC_RECOMBINATION	REACTOME_MEIOTIC_RECOMBINATION	3/282	87/13356	0.27864	0.548756	0.456726	RPA1/BLM/BRCA1	3
HPV PPIs	REACTOME_PROTEIN_PROTEIN_INTERACTIONS_AT_SYNAPSES	REACTOME_PROTEIN_PROTEIN_INTERACTIONS_AT_SYNAPSES	3/282	87/13356	0.27864	0.548756	0.456726	PPFIA1/PPFIA2/SHARPIN	3
HPV PPIs	REACTOME_IRE1ALPHA_ACTIVATES_CHAPERONES	REACTOME_IRE1ALPHA_ACTIVATES_CHAPERONES	2/282	50/13356	0.284954	0.554486	0.461495	CUL7/WFS1	2
HPV PPIs	REACTOME_PHOSPHOLIPID_METABOLISM	REACTOME_PHOSPHOLIPID_METABOLISM	6/282	211/13356	0.287635	0.554486	0.461495	CSNK2A1/VAC14/MTMR3/PLEKHA5/PIP5K1A/MTMR14	6
HPV PPIs	BIOCARTA_CK1_PATHWAY	BIOCARTA_CK1_PATHWAY	1/282	16/13356	0.289394	0.554486	0.461495	CDK5	1
HPV PPIs	BIOCARTA_PITX2_PATHWAY	BIOCARTA_PITX2_PATHWAY	1/282	16/13356	0.289394	0.554486	0.461495	APC	1
HPV PPIs	PID_DNA_PK_PATHWAY	PID_DNA_PK_PATHWAY	1/282	16/13356	0.289394	0.554486	0.461495	CSNK2A1	1
HPV PPIs	REACTOME_CRMPS_IN_SEMA3A_SIGNALING	REACTOME_CRMPS_IN_SEMA3A_SIGNALING	1/282	16/13356	0.289394	0.554486	0.461495	CDK5	1
HPV PPIs	REACTOME_FOXO_MEDIATED_TRANSCRIPTION_OF_CELL_DEATH_GENES	REACTOME_FOXO_MEDIATED_TRANSCRIPTION_OF_CELL_DEATH_GENES	1/282	16/13356	0.289394	0.554486	0.461495	STK11	1
HPV PPIs	REACTOME_MRNA_DECAY_BY_3_TO_5_EXORIBONUCLEASE	REACTOME_MRNA_DECAY_BY_3_TO_5_EXORIBONUCLEASE	1/282	16/13356	0.289394	0.554486	0.461495	EXOSC4	1
HPV PPIs	REACTOME_P75NTR_SIGNALS_VIA_NF_KB	REACTOME_P75NTR_SIGNALS_VIA_NF_KB	1/282	16/13356	0.289394	0.554486	0.461495	PRKCI	1
HPV PPIs	REACTOME_POLO_LIKE_KINASE_MEDIATED_EVENTS	REACTOME_POLO_LIKE_KINASE_MEDIATED_EVENTS	1/282	16/13356	0.289394	0.554486	0.461495	CCNB1	1
HPV PPIs	REACTOME_RAP1_SIGNALLING	REACTOME_RAP1_SIGNALLING	1/282	16/13356	0.289394	0.554486	0.461495	PRKACA	1
HPV PPIs	REACTOME_SYNTHESIS_OF_PIPS_AT_THE_EARLY_ENDOSOME_MEMBRANE	REACTOME_SYNTHESIS_OF_PIPS_AT_THE_EARLY_ENDOSOME_MEMBRANE	1/282	16/13356	0.289394	0.554486	0.461495	VAC14	1
HPV PPIs	WP_AIRWAY_SMOOTH_MUSCLE_CELL_CONTRACTION	WP_AIRWAY_SMOOTH_MUSCLE_CELL_CONTRACTION	1/282	16/13356	0.289394	0.554486	0.461495	PPP1CB	1
HPV PPIs	WP_MAPK_PATHWAY_IN_CONGENITAL_THYROID_CANCER	WP_MAPK_PATHWAY_IN_CONGENITAL_THYROID_CANCER	1/282	16/13356	0.289394	0.554486	0.461495	KSR1	1
HPV PPIs	WP_QUERCETIN_AND_NFKB_AP1_INDUCED_APOPTOSIS	WP_QUERCETIN_AND_NFKB_AP1_INDUCED_APOPTOSIS	1/282	16/13356	0.289394	0.554486	0.461495	MT-CO1	1
HPV PPIs	WP_EBOLA_VIRUS_INFECTION_IN_HOST	WP_EBOLA_VIRUS_INFECTION_IN_HOST	4/282	129/13356	0.290155	0.554486	0.461495	FLNA/HLA-C/HLA-A/HLA-B	4
HPV PPIs	WNT_SIGNALING	WNT_SIGNALING	3/282	89/13356	0.290165	0.554486	0.461495	CSNK2A1/APC/CTBP2	3
HPV PPIs	WP_ALLOGRAFT_REJECTION	WP_ALLOGRAFT_REJECTION	3/282	89/13356	0.290165	0.554486	0.461495	HLA-C/HLA-A/HLA-B	3
HPV PPIs	WP_PANCREATIC_ADENOCARCINOMA_PATHWAY	WP_PANCREATIC_ADENOCARCINOMA_PATHWAY	3/282	89/13356	0.290165	0.554486	0.461495	RB1/E2F1/E2F3	3
HPV PPIs	REACTOME_GAP_JUNCTION_TRAFFICKING_AND_REGULATION	REACTOME_GAP_JUNCTION_TRAFFICKING_AND_REGULATION	2/282	51/13356	0.292803	0.558656	0.464965	AP2M1/TUBA4A	2
HPV PPIs	REACTOME_TRANSCRIPTIONAL_REGULATION_OF_GRANULOPOIESIS	REACTOME_TRANSCRIPTIONAL_REGULATION_OF_GRANULOPOIESIS	3/282	90/13356	0.29594	0.560694	0.466661	E2F1/TFDP1/TFDP2	3
HPV PPIs	REACTOME_RNA_POLYMERASE_I_PROMOTER_ESCAPE	REACTOME_RNA_POLYMERASE_I_PROMOTER_ESCAPE	3/282	91/13356	0.301723	0.560694	0.466661	UBTF/POLR2E/POLR2H	3
HPV PPIs	WP_VEGFAVEGFR2_SIGNALING_PATHWAY	WP_VEGFAVEGFR2_SIGNALING_PATHWAY	11/282	431/13356	0.302942	0.560694	0.466661	SRPK1/BRD4/ACOT9/DNAJB4/SLC7A1/UBAP2L/AP2A1/PTPN14/CNP/PRKCI/HSPB1	11
HPV PPIs	WP_TGFBETA_SIGNALING_PATHWAY	WP_TGFBETA_SIGNALING_PATHWAY	4/282	132/13356	0.304405	0.560694	0.466661	UCHL5/TFDP1/RBL1/SP1	4
HPV PPIs	BIOCARTA_ARAP_PATHWAY	BIOCARTA_ARAP_PATHWAY	1/282	17/13356	0.304416	0.560694	0.466661	COPA	1
HPV PPIs	BIOCARTA_PML_PATHWAY	BIOCARTA_PML_PATHWAY	1/282	17/13356	0.304416	0.560694	0.466661	RB1	1
HPV PPIs	BIOCARTA_TEL_PATHWAY	BIOCARTA_TEL_PATHWAY	1/282	17/13356	0.304416	0.560694	0.466661	RB1	1
HPV PPIs	KEGG_ONE_CARBON_POOL_BY_FOLATE	KEGG_ONE_CARBON_POOL_BY_FOLATE	1/282	17/13356	0.304416	0.560694	0.466661	TYMS	1
HPV PPIs	KEGG_STEROID_BIOSYNTHESIS	KEGG_STEROID_BIOSYNTHESIS	1/282	17/13356	0.304416	0.560694	0.466661	DHCR7	1
HPV PPIs	PID_INTEGRIN5_PATHWAY	PID_INTEGRIN5_PATHWAY	1/282	17/13356	0.304416	0.560694	0.466661	VTN	1
HPV PPIs	PID_NFKAPPAB_ATYPICAL_PATHWAY	PID_NFKAPPAB_ATYPICAL_PATHWAY	1/282	17/13356	0.304416	0.560694	0.466661	CSNK2A1	1
HPV PPIs	PID_SYNDECAN_3_PATHWAY	PID_SYNDECAN_3_PATHWAY	1/282	17/13356	0.304416	0.560694	0.466661	CTTN	1
HPV PPIs	REACTOME_BETA_CATENIN_PHOSPHORYLATION_CASCADE	REACTOME_BETA_CATENIN_PHOSPHORYLATION_CASCADE	1/282	17/13356	0.304416	0.560694	0.466661	APC	1
HPV PPIs	REACTOME_BUTYRATE_RESPONSE_FACTOR_1_BRF1_BINDS_AND_DESTABILIZES_MRNA	REACTOME_BUTYRATE_RESPONSE_FACTOR_1_BRF1_BINDS_AND_DESTABILIZES_MRNA	1/282	17/13356	0.304416	0.560694	0.466661	EXOSC4	1
HPV PPIs	REACTOME_FORMATION_OF_SENESCENCE_ASSOCIATED_HETEROCHROMATIN_FOCI_SAHF	REACTOME_FORMATION_OF_SENESCENCE_ASSOCIATED_HETEROCHROMATIN_FOCI_SAHF	1/282	17/13356	0.304416	0.560694	0.466661	RB1	1
HPV PPIs	REACTOME_HYALURONAN_METABOLISM	REACTOME_HYALURONAN_METABOLISM	1/282	17/13356	0.304416	0.560694	0.466661	HAS1	1
HPV PPIs	REACTOME_KSRP_KHSRP_BINDS_AND_DESTABILIZES_MRNA	REACTOME_KSRP_KHSRP_BINDS_AND_DESTABILIZES_MRNA	1/282	17/13356	0.304416	0.560694	0.466661	EXOSC4	1
HPV PPIs	REACTOME_PKA_ACTIVATION_IN_GLUCAGON_SIGNALLING	REACTOME_PKA_ACTIVATION_IN_GLUCAGON_SIGNALLING	1/282	17/13356	0.304416	0.560694	0.466661	PRKACA	1
HPV PPIs	REACTOME_TRANSLESION_SYNTHESIS_BY_POLK	REACTOME_TRANSLESION_SYNTHESIS_BY_POLK	1/282	17/13356	0.304416	0.560694	0.466661	RPA1	1
HPV PPIs	REACTOME_TRISTETRAPROLIN_TTP_ZFP36_BINDS_AND_DESTABILIZES_MRNA	REACTOME_TRISTETRAPROLIN_TTP_ZFP36_BINDS_AND_DESTABILIZES_MRNA	1/282	17/13356	0.304416	0.560694	0.466661	EXOSC4	1
HPV PPIs	REACTOME_ZINC_TRANSPORTERS	REACTOME_ZINC_TRANSPORTERS	1/282	17/13356	0.304416	0.560694	0.466661	SLC39A7	1
HPV PPIs	WP_CORI_CYCLE	WP_CORI_CYCLE	1/282	17/13356	0.304416	0.560694	0.466661	PFKP	1
HPV PPIs	WP_MAP3K1_ROLE_IN_PROMOTING_AND_BLOCKING_GONADAL_DETERMINATION	WP_MAP3K1_ROLE_IN_PROMOTING_AND_BLOCKING_GONADAL_DETERMINATION	1/282	17/13356	0.304416	0.560694	0.466661	MAP3K4	1
HPV PPIs	WP_CORTICOTROPINRELEASING_HORMONE_SIGNALING_PATHWAY	WP_CORTICOTROPINRELEASING_HORMONE_SIGNALING_PATHWAY	3/282	92/13356	0.307511	0.564749	0.470037	SP1/PRKCI/GRK6	3
HPV PPIs	PID_NFAT_3PATHWAY	PID_NFAT_3PATHWAY	2/282	53/13356	0.308465	0.564749	0.470037	CSNK2A1/PRKACA	2
HPV PPIs	REACTOME_NUCLEAR_ENVELOPE_BREAKDOWN	REACTOME_NUCLEAR_ENVELOPE_BREAKDOWN	2/282	53/13356	0.308465	0.564749	0.470037	CCNB1/NUP88	2
HPV PPIs	WP_COPPER_HOMEOSTASIS	WP_COPPER_HOMEOSTASIS	2/282	53/13356	0.308465	0.564749	0.470037	APC/SP1	2
HPV PPIs	REACTOME_POST_TRANSLATIONAL_MODIFICATION_SYNTHESIS_OF_GPI_ANCHORED_PROTEINS	REACTOME_POST_TRANSLATIONAL_MODIFICATION_SYNTHESIS_OF_GPI_ANCHORED_PROTEINS	3/282	93/13356	0.313303	0.569759	0.474207	PIGS/PIGK/PIGU	3
HPV PPIs	REACTOME_SIGNALING_BY_ROBO_RECEPTORS	REACTOME_SIGNALING_BY_ROBO_RECEPTORS	6/282	218/13356	0.313388	0.569759	0.474207	RPL36AL/PRKACA/CLASP1/PSME2/PSME1/PSMA4	6
HPV PPIs	PID_RAC1_PATHWAY	PID_RAC1_PATHWAY	2/282	54/13356	0.316271	0.569759	0.474207	RACGAP1/PIP5K1A	2
HPV PPIs	PID_TAP63_PATHWAY	PID_TAP63_PATHWAY	2/282	54/13356	0.316271	0.569759	0.474207	DICER1/SP1	2
HPV PPIs	WP_ALZHEIMERS_DISEASE	WP_ALZHEIMERS_DISEASE	7/282	262/13356	0.317405	0.569759	0.474207	LRP1/CSNK2A1/APC/PSMA4/TUBA4A/CDK5/IDE	7
HPV PPIs	REACTOME_EUKARYOTIC_TRANSLATION_ELONGATION	REACTOME_EUKARYOTIC_TRANSLATION_ELONGATION	3/282	94/13356	0.319098	0.569759	0.474207	RPL36AL/EEF1D/EEF1B2	3
HPV PPIs	BIOCARTA_CALCINEURIN_PATHWAY	BIOCARTA_CALCINEURIN_PATHWAY	1/282	18/13356	0.319121	0.569759	0.474207	SP1	1
HPV PPIs	BIOCARTA_MCM_PATHWAY	BIOCARTA_MCM_PATHWAY	1/282	18/13356	0.319121	0.569759	0.474207	MCM5	1
HPV PPIs	BIOCARTA_MEF2D_PATHWAY	BIOCARTA_MEF2D_PATHWAY	1/282	18/13356	0.319121	0.569759	0.474207	HDAC2	1
HPV PPIs	PID_BETA_CATENIN_DEG_PATHWAY	PID_BETA_CATENIN_DEG_PATHWAY	1/282	18/13356	0.319121	0.569759	0.474207	APC	1
HPV PPIs	REACTOME_CELL_EXTRACELLULAR_MATRIX_INTERACTIONS	REACTOME_CELL_EXTRACELLULAR_MATRIX_INTERACTIONS	1/282	18/13356	0.319121	0.569759	0.474207	FLNA	1
HPV PPIs	REACTOME_MECP2_REGULATES_NEURONAL_RECEPTORS_AND_CHANNELS	REACTOME_MECP2_REGULATES_NEURONAL_RECEPTORS_AND_CHANNELS	1/282	18/13356	0.319121	0.569759	0.474207	HDAC2	1
HPV PPIs	REACTOME_RORA_ACTIVATES_GENE_EXPRESSION	REACTOME_RORA_ACTIVATES_GENE_EXPRESSION	1/282	18/13356	0.319121	0.569759	0.474207	TBL1XR1	1
HPV PPIs	REACTOME_SYNTHESIS_OF_PIPS_AT_THE_GOLGI_MEMBRANE	REACTOME_SYNTHESIS_OF_PIPS_AT_THE_GOLGI_MEMBRANE	1/282	18/13356	0.319121	0.569759	0.474207	VAC14	1
HPV PPIs	WP_FAMILIAL_HYPERLIPIDEMIA_TYPE_1	WP_FAMILIAL_HYPERLIPIDEMIA_TYPE_1	1/282	18/13356	0.319121	0.569759	0.474207	LRP1	1
HPV PPIs	WP_TCA_CYCLE_AKA_KREBS_OR_CITRIC_ACID_CYCLE	WP_TCA_CYCLE_AKA_KREBS_OR_CITRIC_ACID_CYCLE	1/282	18/13356	0.319121	0.569759	0.474207	SDHB	1
HPV PPIs	WP_TRANSCRIPTION_COFACTORS_SKI_AND_SKIL_PROTEIN_PARTNERS	WP_TRANSCRIPTION_COFACTORS_SKI_AND_SKIL_PROTEIN_PARTNERS	1/282	18/13356	0.319121	0.569759	0.474207	HDAC3	1
HPV PPIs	WP_MALIGNANT_PLEURAL_MESOTHELIOMA	WP_MALIGNANT_PLEURAL_MESOTHELIOMA	11/282	439/13356	0.323829	0.576887	0.480139	MAP3K4/CSNK2A1/APC/BRCA1/SLC3A2/E2F1/SP1/CTBP2/OGT/KIF23/CHD8	11
HPV PPIs	WP_PATHOGENIC_ESCHERICHIA_COLI_INFECTION	WP_PATHOGENIC_ESCHERICHIA_COLI_INFECTION	2/282	55/13356	0.324057	0.576887	0.480139	CTTN/TUBA4A	2
HPV PPIs	REACTOME_TRANSCRIPTIONAL_REGULATION_BY_RUNX3	REACTOME_TRANSCRIPTIONAL_REGULATION_BY_RUNX3	3/282	96/13356	0.330692	0.580215	0.482909	PSME2/PSME1/PSMA4	3
HPV PPIs	WP_COMPLEMENT_SYSTEM	WP_COMPLEMENT_SYSTEM	3/282	96/13356	0.330692	0.580215	0.482909	PRKACA/LRP2/VTN	3
HPV PPIs	WP_SMALL_CELL_LUNG_CANCER	WP_SMALL_CELL_LUNG_CANCER	3/282	96/13356	0.330692	0.580215	0.482909	RB1/E2F1/E2F3	3
HPV PPIs	KEGG_HEDGEHOG_SIGNALING_PATHWAY	KEGG_HEDGEHOG_SIGNALING_PATHWAY	2/282	56/13356	0.33182	0.580215	0.482909	PRKACA/LRP2	2
HPV PPIs	KEGG_PATHOGENIC_ESCHERICHIA_COLI_INFECTION	KEGG_PATHOGENIC_ESCHERICHIA_COLI_INFECTION	2/282	56/13356	0.33182	0.580215	0.482909	CTTN/TUBA4A	2
HPV PPIs	REACTOME_DEADENYLATION_DEPENDENT_MRNA_DECAY	REACTOME_DEADENYLATION_DEPENDENT_MRNA_DECAY	2/282	56/13356	0.33182	0.580215	0.482909	TUT7/EXOSC4	2
HPV PPIs	REACTOME_GOLGI_ASSOCIATED_VESICLE_BIOGENESIS	REACTOME_GOLGI_ASSOCIATED_VESICLE_BIOGENESIS	2/282	56/13356	0.33182	0.580215	0.482909	AP1M1/AP3B1	2
HPV PPIs	WP_MITOCHONDRIAL_COMPLEX_I_ASSEMBLY_MODEL_OXPHOS_SYSTEM	WP_MITOCHONDRIAL_COMPLEX_I_ASSEMBLY_MODEL_OXPHOS_SYSTEM	2/282	56/13356	0.33182	0.580215	0.482909	NDUFA5/NDUFS1	2
HPV PPIs	BIOCARTA_EPO_PATHWAY	BIOCARTA_EPO_PATHWAY	1/282	19/13356	0.333517	0.580215	0.482909	CSNK2A1	1
HPV PPIs	BIOCARTA_TGFB_PATHWAY	BIOCARTA_TGFB_PATHWAY	1/282	19/13356	0.333517	0.580215	0.482909	APC	1
HPV PPIs	BIOCARTA_TID_PATHWAY	BIOCARTA_TID_PATHWAY	1/282	19/13356	0.333517	0.580215	0.482909	RB1	1
HPV PPIs	PID_EPHA2_FWD_PATHWAY	PID_EPHA2_FWD_PATHWAY	1/282	19/13356	0.333517	0.580215	0.482909	ARHGAP35	1
HPV PPIs	REACTOME_PLASMA_LIPOPROTEIN_ASSEMBLY	REACTOME_PLASMA_LIPOPROTEIN_ASSEMBLY	1/282	19/13356	0.333517	0.580215	0.482909	PRKACA	1
HPV PPIs	REACTOME_RHO_GTPASES_ACTIVATE_ROCKS	REACTOME_RHO_GTPASES_ACTIVATE_ROCKS	1/282	19/13356	0.333517	0.580215	0.482909	PPP1CB	1
HPV PPIs	REACTOME_SCAVENGING_BY_CLASS_A_RECEPTORS	REACTOME_SCAVENGING_BY_CLASS_A_RECEPTORS	1/282	19/13356	0.333517	0.580215	0.482909	HSP90B1	1
HPV PPIs	WP_MITOCHONDRIAL_GENE_EXPRESSION	WP_MITOCHONDRIAL_GENE_EXPRESSION	1/282	19/13356	0.333517	0.580215	0.482909	SP1	1
HPV PPIs	REACTOME_P75_NTR_RECEPTOR_MEDIATED_SIGNALLING	REACTOME_P75_NTR_RECEPTOR_MEDIATED_SIGNALLING	3/282	97/13356	0.336487	0.583721	0.485827	HDAC2/HDAC3/PRKCI	3
HPV PPIs	WP_B_CELL_RECEPTOR_SIGNALING_PATHWAY	WP_B_CELL_RECEPTOR_SIGNALING_PATHWAY	3/282	97/13356	0.336487	0.583721	0.485827	GTF2I/E2F3/PIP5K1A	3
HPV PPIs	PID_SHP2_PATHWAY	PID_SHP2_PATHWAY	2/282	57/13356	0.339558	0.586553	0.488184	PRKACA/ARHGAP35	2
HPV PPIs	REACTOME_COMPLEX_I_BIOGENESIS	REACTOME_COMPLEX_I_BIOGENESIS	2/282	57/13356	0.339558	0.586553	0.488184	NDUFA5/NDUFS1	2
HPV PPIs	REACTOME_HSP90_CHAPERONE_CYCLE_FOR_STEROID_HORMONE_RECEPTORS_SHR_IN_THE_PRESENCE_OF_LIGAND	REACTOME_HSP90_CHAPERONE_CYCLE_FOR_STEROID_HORMONE_RECEPTORS_SHR_IN_THE_PRESENCE_OF_LIGAND	2/282	57/13356	0.339558	0.586553	0.488184	DNAJB1/TUBA4A	2
HPV PPIs	REACTOME_C_TYPE_LECTIN_RECEPTORS_CLRS	REACTOME_C_TYPE_LECTIN_RECEPTORS_CLRS	4/282	140/13356	0.342711	0.589633	0.490748	PRKACA/PSME2/PSME1/PSMA4	4
HPV PPIs	REACTOME_FORMATION_OF_RNA_POL_II_ELONGATION_COMPLEX	REACTOME_FORMATION_OF_RNA_POL_II_ELONGATION_COMPLEX	2/282	58/13356	0.347268	0.589633	0.490748	POLR2E/POLR2H	2
HPV PPIs	REACTOME_DEATH_RECEPTOR_SIGNALLING	REACTOME_DEATH_RECEPTOR_SIGNALLING	4/282	141/13356	0.347517	0.589633	0.490748	HDAC2/SHARPIN/HDAC3/PRKCI	4
HPV PPIs	BIOCARTA_ATM_PATHWAY	BIOCARTA_ATM_PATHWAY	1/282	20/13356	0.347609	0.589633	0.490748	BRCA1	1
HPV PPIs	BIOCARTA_GSK3_PATHWAY	BIOCARTA_GSK3_PATHWAY	1/282	20/13356	0.347609	0.589633	0.490748	APC	1
HPV PPIs	BIOCARTA_NGF_PATHWAY	BIOCARTA_NGF_PATHWAY	1/282	20/13356	0.347609	0.589633	0.490748	CSNK2A1	1
HPV PPIs	BIOCARTA_NKCELLS_PATHWAY	BIOCARTA_NKCELLS_PATHWAY	1/282	20/13356	0.347609	0.589633	0.490748	HLA-A	1
HPV PPIs	BIOCARTA_STATHMIN_PATHWAY	BIOCARTA_STATHMIN_PATHWAY	1/282	20/13356	0.347609	0.589633	0.490748	CCNB1	1
HPV PPIs	REACTOME_LAGGING_STRAND_SYNTHESIS	REACTOME_LAGGING_STRAND_SYNTHESIS	1/282	20/13356	0.347609	0.589633	0.490748	RPA1	1
HPV PPIs	REACTOME_PKA_MEDIATED_PHOSPHORYLATION_OF_CREB	REACTOME_PKA_MEDIATED_PHOSPHORYLATION_OF_CREB	1/282	20/13356	0.347609	0.589633	0.490748	PRKACA	1
HPV PPIs	REACTOME_SIGNALING_BY_PDGFR_IN_DISEASE	REACTOME_SIGNALING_BY_PDGFR_IN_DISEASE	1/282	20/13356	0.347609	0.589633	0.490748	WDR48	1
HPV PPIs	WP_2Q211_COPY_NUMBER_VARIATION_SYNDROME	WP_2Q211_COPY_NUMBER_VARIATION_SYNDROME	1/282	20/13356	0.347609	0.589633	0.490748	APC	1
HPV PPIs	WP_HEREDITARY_LEIOMYOMATOSIS_AND_RENAL_CELL_CARCINOMA_PATHWAY	WP_HEREDITARY_LEIOMYOMATOSIS_AND_RENAL_CELL_CARCINOMA_PATHWAY	1/282	20/13356	0.347609	0.589633	0.490748	CUL3	1
HPV PPIs	WP_ECTODERM_DIFFERENTIATION	WP_ECTODERM_DIFFERENTIATION	4/282	142/13356	0.352323	0.591697	0.492465	UBTF/OGT/KIFC3/GATA6	4
HPV PPIs	REACTOME_CLEC7A_DECTIN_1_SIGNALING	REACTOME_CLEC7A_DECTIN_1_SIGNALING	3/282	100/13356	0.353853	0.591697	0.492465	PSME2/PSME1/PSMA4	3
HPV PPIs	REACTOME_VISUAL_PHOTOTRANSDUCTION	REACTOME_VISUAL_PHOTOTRANSDUCTION	3/282	100/13356	0.353853	0.591697	0.492465	LRP1/LRP2/RDH11	3
HPV PPIs	KEGG_RNA_DEGRADATION	KEGG_RNA_DEGRADATION	2/282	59/13356	0.354949	0.591697	0.492465	MTREX/EXOSC4	2
HPV PPIs	PID_FAK_PATHWAY	PID_FAK_PATHWAY	2/282	59/13356	0.354949	0.591697	0.492465	ARHGAP35/PTPN21	2
HPV PPIs	PID_NOTCH_PATHWAY	PID_NOTCH_PATHWAY	2/282	59/13356	0.354949	0.591697	0.492465	NCOR1/CNTN6	2
HPV PPIs	WP_IL18_SIGNALING_PATHWAY	WP_IL18_SIGNALING_PATHWAY	7/282	273/13356	0.355027	0.591697	0.492465	ANP32A/RANGAP1/ZNF143/SP1/HDAC3/KIFC3/HSPB1	7
HPV PPIs	WP_ENDODERM_DIFFERENTIATION	WP_ENDODERM_DIFFERENTIATION	4/282	143/13356	0.35713	0.591697	0.492465	APC/CTBP2/ZIC3/GATA6	4
HPV PPIs	REACTOME_TNFR2_NON_CANONICAL_NF_KB_PATHWAY	REACTOME_TNFR2_NON_CANONICAL_NF_KB_PATHWAY	3/282	101/13356	0.359631	0.591697	0.492465	PSME2/PSME1/PSMA4	3
HPV PPIs	WP_NEURAL_CREST_DIFFERENTIATION	WP_NEURAL_CREST_DIFFERENTIATION	3/282	101/13356	0.359631	0.591697	0.492465	HDAC2/CTBP2/HDAC3	3
HPV PPIs	BIOCARTA_IGF1_PATHWAY	BIOCARTA_IGF1_PATHWAY	1/282	21/13356	0.361404	0.591697	0.492465	CSNK2A1	1
HPV PPIs	BIOCARTA_IL6_PATHWAY	BIOCARTA_IL6_PATHWAY	1/282	21/13356	0.361404	0.591697	0.492465	CSNK2A1	1
HPV PPIs	BIOCARTA_INSULIN_PATHWAY	BIOCARTA_INSULIN_PATHWAY	1/282	21/13356	0.361404	0.591697	0.492465	CSNK2A1	1
HPV PPIs	BIOCARTA_MPR_PATHWAY	BIOCARTA_MPR_PATHWAY	1/282	21/13356	0.361404	0.591697	0.492465	CCNB1	1
HPV PPIs	BIOCARTA_RAC1_PATHWAY	BIOCARTA_RAC1_PATHWAY	1/282	21/13356	0.361404	0.591697	0.492465	CDK5	1
HPV PPIs	BIOCARTA_RHO_PATHWAY	BIOCARTA_RHO_PATHWAY	1/282	21/13356	0.361404	0.591697	0.492465	PIP5K1A	1
HPV PPIs	PID_ECADHERIN_KERATINOCYTE_PATHWAY	PID_ECADHERIN_KERATINOCYTE_PATHWAY	1/282	21/13356	0.361404	0.591697	0.492465	PIP5K1A	1
HPV PPIs	PID_P38_MK2_PATHWAY	PID_P38_MK2_PATHWAY	1/282	21/13356	0.361404	0.591697	0.492465	HSPB1	1
HPV PPIs	REACTOME_CD209_DC_SIGN_SIGNALING	REACTOME_CD209_DC_SIGN_SIGNALING	1/282	21/13356	0.361404	0.591697	0.492465	PRKACA	1
HPV PPIs	REACTOME_INTERLEUKIN_37_SIGNALING	REACTOME_INTERLEUKIN_37_SIGNALING	1/282	21/13356	0.361404	0.591697	0.492465	PTPN14	1
HPV PPIs	REACTOME_MITOCHONDRIAL_TRNA_AMINOACYLATION	REACTOME_MITOCHONDRIAL_TRNA_AMINOACYLATION	1/282	21/13356	0.361404	0.591697	0.492465	IARS2	1
HPV PPIs	REACTOME_PCNA_DEPENDENT_LONG_PATCH_BASE_EXCISION_REPAIR	REACTOME_PCNA_DEPENDENT_LONG_PATCH_BASE_EXCISION_REPAIR	1/282	21/13356	0.361404	0.591697	0.492465	RPA1	1
HPV PPIs	REACTOME_SIGNAL_TRANSDUCTION_BY_L1	REACTOME_SIGNAL_TRANSDUCTION_BY_L1	1/282	21/13356	0.361404	0.591697	0.492465	CSNK2A1	1
HPV PPIs	REACTOME_TRANSPORT_OF_CONNEXONS_TO_THE_PLASMA_MEMBRANE	REACTOME_TRANSPORT_OF_CONNEXONS_TO_THE_PLASMA_MEMBRANE	1/282	21/13356	0.361404	0.591697	0.492465	TUBA4A	1
HPV PPIs	WP_EXTRACELLULAR_VESICLES_IN_THE_CROSSTALK_OF_CARDIAC_CELLS	WP_EXTRACELLULAR_VESICLES_IN_THE_CROSSTALK_OF_CARDIAC_CELLS	1/282	21/13356	0.361404	0.591697	0.492465	HSPB1	1
HPV PPIs	WP_UREA_CYCLE_AND_METABOLISM_OF_AMINO_GROUPS	WP_UREA_CYCLE_AND_METABOLISM_OF_AMINO_GROUPS	1/282	21/13356	0.361404	0.591697	0.492465	ALDH18A1	1
HPV PPIs	REACTOME_NEURONAL_SYSTEM	REACTOME_NEURONAL_SYSTEM	10/282	411/13356	0.369052	0.603307	0.502129	PPFIA1/PPFIA2/PRKACA/ARL6IP5/SHARPIN/AP2M1/AP2A1/AP2A2/AP2B1/TUBA4A	10
HPV PPIs	WP_NOTCH_SIGNALING_PATHWAY	WP_NOTCH_SIGNALING_PATHWAY	2/282	61/13356	0.370211	0.603307	0.502129	HDAC2/NCOR1	2
HPV PPIs	BIOCARTA_ATRBRCA_PATHWAY	BIOCARTA_ATRBRCA_PATHWAY	1/282	22/13356	0.374909	0.603307	0.502129	BRCA1	1
HPV PPIs	BIOCARTA_IL2_PATHWAY	BIOCARTA_IL2_PATHWAY	1/282	22/13356	0.374909	0.603307	0.502129	CSNK2A1	1
HPV PPIs	KEGG_BIOSYNTHESIS_OF_UNSATURATED_FATTY_ACIDS	KEGG_BIOSYNTHESIS_OF_UNSATURATED_FATTY_ACIDS	1/282	22/13356	0.374909	0.603307	0.502129	ELOVL5	1
HPV PPIs	PID_HEDGEHOG_2PATHWAY	PID_HEDGEHOG_2PATHWAY	1/282	22/13356	0.374909	0.603307	0.502129	LRP2	1
HPV PPIs	PID_PDGFRA_PATHWAY	PID_PDGFRA_PATHWAY	1/282	22/13356	0.374909	0.603307	0.502129	CSNK2A1	1
HPV PPIs	REACTOME_CITRIC_ACID_CYCLE_TCA_CYCLE	REACTOME_CITRIC_ACID_CYCLE_TCA_CYCLE	1/282	22/13356	0.374909	0.603307	0.502129	SDHB	1
HPV PPIs	REACTOME_COBALAMIN_CBL_VITAMIN_B12_TRANSPORT_AND_METABOLISM	REACTOME_COBALAMIN_CBL_VITAMIN_B12_TRANSPORT_AND_METABOLISM	1/282	22/13356	0.374909	0.603307	0.502129	LRP2	1
HPV PPIs	REACTOME_PINK1_PRKN_MEDIATED_MITOPHAGY	REACTOME_PINK1_PRKN_MEDIATED_MITOPHAGY	1/282	22/13356	0.374909	0.603307	0.502129	TOMM70	1
HPV PPIs	REACTOME_RA_BIOSYNTHESIS_PATHWAY	REACTOME_RA_BIOSYNTHESIS_PATHWAY	1/282	22/13356	0.374909	0.603307	0.502129	RDH11	1
HPV PPIs	WP_FAMILIAL_HYPERLIPIDEMIA_TYPE_4	WP_FAMILIAL_HYPERLIPIDEMIA_TYPE_4	1/282	22/13356	0.374909	0.603307	0.502129	LRP1	1
HPV PPIs	WP_PURINE_METABOLISM_AND_RELATED_DISORDERS	WP_PURINE_METABOLISM_AND_RELATED_DISORDERS	1/282	22/13356	0.374909	0.603307	0.502129	PAICS	1
HPV PPIs	KEGG_COLORECTAL_CANCER	KEGG_COLORECTAL_CANCER	2/282	62/13356	0.377789	0.606347	0.504658	APC/MSH3	2
HPV PPIs	KEGG_GLYCOLYSIS_GLUCONEOGENESIS	KEGG_GLYCOLYSIS_GLUCONEOGENESIS	2/282	62/13356	0.377789	0.606347	0.504658	PFKP/PFKM	2
HPV PPIs	KEGG_PATHWAYS_IN_CANCER	KEGG_PATHWAYS_IN_CANCER	8/282	325/13356	0.380216	0.609442	0.507235	HSP90B1/APC/HDAC2/RB1/E2F1/E2F3/CTBP2/MSH3	8
HPV PPIs	PID_ERBB1_DOWNSTREAM_PATHWAY	PID_ERBB1_DOWNSTREAM_PATHWAY	3/282	105/13356	0.382658	0.610539	0.508147	PPP2R2A/USP6NL/KSR1	3
HPV PPIs	REACTOME_SIGNALING_BY_FGFR_IN_DISEASE	REACTOME_SIGNALING_BY_FGFR_IN_DISEASE	2/282	63/13356	0.385329	0.610539	0.508147	POLR2E/POLR2H	2
HPV PPIs	WP_ENDOCHONDRAL_OSSIFICATION	WP_ENDOCHONDRAL_OSSIFICATION	2/282	63/13356	0.385329	0.610539	0.508147	PRKACA/CAB39	2
HPV PPIs	WP_ENDOCHONDRAL_OSSIFICATION_WITH_SKELETAL_DYSPLASIAS	WP_ENDOCHONDRAL_OSSIFICATION_WITH_SKELETAL_DYSPLASIAS	2/282	63/13356	0.385329	0.610539	0.508147	PRKACA/CAB39	2
HPV PPIs	REACTOME_HIV_LIFE_CYCLE	REACTOME_HIV_LIFE_CYCLE	4/282	149/13356	0.385939	0.610539	0.508147	RANGAP1/POLR2E/NUP88/POLR2H	4
HPV PPIs	REACTOME_NUCLEOTIDE_SALVAGE	REACTOME_NUCLEOTIDE_SALVAGE	1/282	23/13356	0.388129	0.610539	0.508147	AMPD2	1
HPV PPIs	REACTOME_POST_CHAPERONIN_TUBULIN_FOLDING_PATHWAY	REACTOME_POST_CHAPERONIN_TUBULIN_FOLDING_PATHWAY	1/282	23/13356	0.388129	0.610539	0.508147	TUBA4A	1
HPV PPIs	REACTOME_RHOBTB2_GTPASE_CYCLE	REACTOME_RHOBTB2_GTPASE_CYCLE	1/282	23/13356	0.388129	0.610539	0.508147	CUL3	1
HPV PPIs	REACTOME_TELOMERE_EXTENSION_BY_TELOMERASE	REACTOME_TELOMERE_EXTENSION_BY_TELOMERASE	1/282	23/13356	0.388129	0.610539	0.508147	PPP6R3	1
HPV PPIs	REACTOME_THE_CANONICAL_RETINOID_CYCLE_IN_RODS_TWILIGHT_VISION	REACTOME_THE_CANONICAL_RETINOID_CYCLE_IN_RODS_TWILIGHT_VISION	1/282	23/13356	0.388129	0.610539	0.508147	RDH11	1
HPV PPIs	WP_CANCER_IMMUNOTHERAPY_BY_PD1_BLOCKADE	WP_CANCER_IMMUNOTHERAPY_BY_PD1_BLOCKADE	1/282	23/13356	0.388129	0.610539	0.508147	HLA-A	1
HPV PPIs	WP_DNA_MISMATCH_REPAIR	WP_DNA_MISMATCH_REPAIR	1/282	23/13356	0.388129	0.610539	0.508147	RPA1	1
HPV PPIs	WP_NAD_METABOLISM_IN_ONCOGENEINDUCED_SENESCENCE_AND_MITOCHONDRIAL_DYSFUNCTIONASSOCIATED_SENESCENCE	WP_NAD_METABOLISM_IN_ONCOGENEINDUCED_SENESCENCE_AND_MITOCHONDRIAL_DYSFUNCTIONASSOCIATED_SENESCENCE	1/282	23/13356	0.388129	0.610539	0.508147	RB1	1
HPV PPIs	WP_NRF2ARE_REGULATION	WP_NRF2ARE_REGULATION	1/282	23/13356	0.388129	0.610539	0.508147	CUL3	1
HPV PPIs	REACTOME_SIGNALING_BY_VEGF	REACTOME_SIGNALING_BY_VEGF	3/282	106/13356	0.388388	0.610539	0.508147	PRKACA/AAMP/HSPB1	3
HPV PPIs	REACTOME_ESTROGEN_DEPENDENT_GENE_EXPRESSION	REACTOME_ESTROGEN_DEPENDENT_GENE_EXPRESSION	4/282	150/13356	0.390729	0.613429	0.510553	POLR2E/SP1/USF2/POLR2H	4
HPV PPIs	REACTOME_CYTOSOLIC_SENSORS_OF_PATHOGEN_ASSOCIATED_DNA	REACTOME_CYTOSOLIC_SENSORS_OF_PATHOGEN_ASSOCIATED_DNA	2/282	64/13356	0.392829	0.614361	0.511329	POLR2E/POLR2H	2
HPV PPIs	REACTOME_SEMAPHORIN_INTERACTIONS	REACTOME_SEMAPHORIN_INTERACTIONS	2/282	64/13356	0.392829	0.614361	0.511329	ARHGAP35/CDK5	2
HPV PPIs	WP_FERROPTOSIS	WP_FERROPTOSIS	2/282	64/13356	0.392829	0.614361	0.511329	SLC3A2/HSPB1	2
HPV PPIs	REACTOME_TRANSCRIPTIONAL_REGULATION_BY_SMALL_RNAS	REACTOME_TRANSCRIPTIONAL_REGULATION_BY_SMALL_RNAS	3/282	107/13356	0.394106	0.61557	0.512335	POLR2E/NUP88/POLR2H	3
HPV PPIs	REACTOME_SIGNALING_BY_BRAF_AND_RAF1_FUSIONS	REACTOME_SIGNALING_BY_BRAF_AND_RAF1_FUSIONS	2/282	65/13356	0.400288	0.620897	0.516769	KSR1/AP3B1	2
HPV PPIs	REACTOME_INTERLEUKIN_1_FAMILY_SIGNALING	REACTOME_INTERLEUKIN_1_FAMILY_SIGNALING	4/282	152/13356	0.400292	0.620897	0.516769	PSME2/PSME1/PTPN14/PSMA4	4
HPV PPIs	BIOCARTA_TPO_PATHWAY	BIOCARTA_TPO_PATHWAY	1/282	24/13356	0.40107	0.620897	0.516769	CSNK2A1	1
HPV PPIs	KEGG_PROTEIN_EXPORT	KEGG_PROTEIN_EXPORT	1/282	24/13356	0.40107	0.620897	0.516769	SEC63	1
HPV PPIs	REACTOME_SEMA4D_IN_SEMAPHORIN_SIGNALING	REACTOME_SEMA4D_IN_SEMAPHORIN_SIGNALING	1/282	24/13356	0.40107	0.620897	0.516769	ARHGAP35	1
HPV PPIs	REACTOME_SYNTHESIS_OF_VERY_LONG_CHAIN_FATTY_ACYL_COAS	REACTOME_SYNTHESIS_OF_VERY_LONG_CHAIN_FATTY_ACYL_COAS	1/282	24/13356	0.40107	0.620897	0.516769	ELOVL5	1
HPV PPIs	REACTOME_THROMBOXANE_SIGNALLING_THROUGH_TP_RECEPTOR	REACTOME_THROMBOXANE_SIGNALLING_THROUGH_TP_RECEPTOR	1/282	24/13356	0.40107	0.620897	0.516769	AAMP	1
HPV PPIs	WP_MESODERMAL_COMMITMENT_PATHWAY	WP_MESODERMAL_COMMITMENT_PATHWAY	4/282	153/13356	0.405065	0.626289	0.521256	PRKACA/CTBP2/ZIC3/GATA6	4
HPV PPIs	REACTOME_FOXO_MEDIATED_TRANSCRIPTION	REACTOME_FOXO_MEDIATED_TRANSCRIPTION	2/282	66/13356	0.407704	0.627987	0.52267	HDAC2/STK11	2
HPV PPIs	WP_AGERAGE_PATHWAY	WP_AGERAGE_PATHWAY	2/282	66/13356	0.407704	0.627987	0.52267	DDOST/SP1	2
HPV PPIs	WP_THYROID_STIMULATING_HORMONE_TSH_SIGNALING_PATHWAY	WP_THYROID_STIMULATING_HORMONE_TSH_SIGNALING_PATHWAY	2/282	66/13356	0.407704	0.627987	0.52267	RB1/E2F1	2
HPV PPIs	REACTOME_BASIGIN_INTERACTIONS	REACTOME_BASIGIN_INTERACTIONS	1/282	25/13356	0.413739	0.629357	0.523809	SLC3A2	1
HPV PPIs	REACTOME_DEADENYLATION_OF_MRNA	REACTOME_DEADENYLATION_OF_MRNA	1/282	25/13356	0.413739	0.629357	0.523809	TUT7	1
HPV PPIs	REACTOME_DEFECTIVE_INTRINSIC_PATHWAY_FOR_APOPTOSIS	REACTOME_DEFECTIVE_INTRINSIC_PATHWAY_FOR_APOPTOSIS	1/282	25/13356	0.413739	0.629357	0.523809	CDK5	1
HPV PPIs	REACTOME_GAP_FILLING_DNA_REPAIR_SYNTHESIS_AND_LIGATION_IN_GG_NER	REACTOME_GAP_FILLING_DNA_REPAIR_SYNTHESIS_AND_LIGATION_IN_GG_NER	1/282	25/13356	0.413739	0.629357	0.523809	RPA1	1
HPV PPIs	REACTOME_GLUCURONIDATION	REACTOME_GLUCURONIDATION	1/282	25/13356	0.413739	0.629357	0.523809	ABHD10	1
HPV PPIs	REACTOME_RESOLUTION_OF_AP_SITES_VIA_THE_MULTIPLE_NUCLEOTIDE_PATCH_REPLACEMENT_PATHWAY	REACTOME_RESOLUTION_OF_AP_SITES_VIA_THE_MULTIPLE_NUCLEOTIDE_PATCH_REPLACEMENT_PATHWAY	1/282	25/13356	0.413739	0.629357	0.523809	RPA1	1
HPV PPIs	REACTOME_SIGNALING_BY_NTRK2_TRKB	REACTOME_SIGNALING_BY_NTRK2_TRKB	1/282	25/13356	0.413739	0.629357	0.523809	CDK5	1
HPV PPIs	WP_HYPOTHESIZED_PATHWAYS_IN_PATHOGENESIS_OF_CARDIOVASCULAR_DISEASE	WP_HYPOTHESIZED_PATHWAYS_IN_PATHOGENESIS_OF_CARDIOVASCULAR_DISEASE	1/282	25/13356	0.413739	0.629357	0.523809	FLNA	1
HPV PPIs	WP_METASTATIC_BRAIN_TUMOR	WP_METASTATIC_BRAIN_TUMOR	1/282	25/13356	0.413739	0.629357	0.523809	E2F3	1
HPV PPIs	WP_S1P_RECEPTOR_SIGNAL_TRANSDUCTION	WP_S1P_RECEPTOR_SIGNAL_TRANSDUCTION	1/282	25/13356	0.413739	0.629357	0.523809	RACGAP1	1
[truncated: 934 more rows]

## Sheet: Table S2
group	ID	Description	GeneRatio	BgRatio	pvalue	p.adjust	qvalue	geneID	Count
13	WP_DNA_DAMAGE_RESPONSE_ONLY_ATM_DEPENDENT	WP_DNA_DAMAGE_RESPONSE_ONLY_ATM_DEPENDENT	2015-05-01	110/13356	9.72502e-08	2.18107e-05	8.54944e-06	AKT1/DVL2/DVL3/PTEN/DVL1	5
13	WP_EMBRYONIC_STEM_CELL_PLURIPOTENCY_PATHWAYS	WP_EMBRYONIC_STEM_CELL_PLURIPOTENCY_PATHWAYS	2015-05-01	116/13356	1.26964e-07	2.18107e-05	8.54944e-06	AKT1/DVL2/DVL3/PTEN/DVL1	5
13	REACTOME_ROLE_OF_SECOND_MESSENGERS_IN_NETRIN_1_SIGNALING	REACTOME_ROLE_OF_SECOND_MESSENGERS_IN_NETRIN_1_SIGNALING	2015-03-01	10/13356	1.36887e-07	2.18107e-05	8.54944e-06	TRPC1/TRPC5/TRPC4	3
13	WP_WNT_SIGNALING_PATHWAY	WP_WNT_SIGNALING_PATHWAY	2015-04-01	51/13356	2.49535e-07	2.39594e-05	9.39171e-06	AKT1/DVL2/DVL3/DVL1	4
13	REACTOME_KILLING_MECHANISMS	REACTOME_KILLING_MECHANISMS	2015-03-01	12/13356	2.50621e-07	2.39594e-05	9.39171e-06	DVL2/DVL3/DVL1	3
13	WP_BREAST_CANCER_PATHWAY	WP_BREAST_CANCER_PATHWAY	2015-05-01	154/13356	5.22494e-07	4.16253e-05	1.63165e-05	AKT1/DVL2/DVL3/PTEN/DVL1	5
13	PID_BETA_CATENIN_DEG_PATHWAY	PID_BETA_CATENIN_DEG_PATHWAY	2015-03-01	18/13356	9.25824e-07	6.32206e-05	2.47815e-05	DVL2/DVL3/DVL1	3
13	PID_WNT_CANONICAL_PATHWAY	PID_WNT_CANONICAL_PATHWAY	2015-03-01	20/13356	1.29169e-06	7.71783e-05	3.02527e-05	DVL2/DVL3/DVL1	3
13	REACTOME_TRP_CHANNELS	REACTOME_TRP_CHANNELS	2015-03-01	28/13356	3.69193e-06	0.000196082	7.68612e-05	TRPC1/TRPC5/TRPC4	3
13	REACTOME_DISASSEMBLY_OF_THE_DESTRUCTION_COMPLEX_AND_RECRUITMENT_OF_AXIN_TO_THE_MEMBRANE	REACTOME_DISASSEMBLY_OF_THE_DESTRUCTION_COMPLEX_AND_RECRUITMENT_OF_AXIN_TO_THE_MEMBRANE	2015-03-01	31/13356	5.05545e-06	0.000241651	9.47232e-05	DVL2/DVL3/DVL1	3
13	PID_WNT_NONCANONICAL_PATHWAY	PID_WNT_NONCANONICAL_PATHWAY	2015-03-01	32/13356	5.57467e-06	0.000242245	9.49561e-05	DVL2/DVL3/DVL1	3
13	WP_WNT_SIGNALING_IN_KIDNEY_DISEASE	WP_WNT_SIGNALING_IN_KIDNEY_DISEASE	2015-03-01	36/13356	8.00321e-06	0.000318794	0.000124962	DVL2/DVL3/DVL1	3
13	REACTOME_LEISHMANIA_INFECTION	REACTOME_LEISHMANIA_INFECTION	2015-05-01	308/13356	1.568e-05	0.000503788	0.000197477	DVL2/DVL3/BAIAP2/WASF1/DVL1	5
13	SIG_CHEMOTAXIS	SIG_CHEMOTAXIS	2015-03-01	45/13356	1.58093e-05	0.000503788	0.000197477	AKT1/PTEN/WASF1	3
13	WP_NOTCH_SIGNALING	WP_NOTCH_SIGNALING	2015-03-01	45/13356	1.58093e-05	0.000503788	0.000197477	DVL2/DVL3/DVL1	3
13	WP_MICROTUBULE_CYTOSKELETON_REGULATION	WP_MICROTUBULE_CYTOSKELETON_REGULATION	2015-03-01	46/13356	1.69008e-05	0.000504912	0.000197917	AKT1/PTEN/DVL1	3
13	KEGG_NOTCH_SIGNALING_PATHWAY	KEGG_NOTCH_SIGNALING_PATHWAY	2015-03-01	47/13356	1.8041e-05	0.00050727	0.000198842	DVL2/DVL3/DVL1	3
13	REACTOME_RHO_GTPASE_EFFECTORS	REACTOME_RHO_GTPASE_EFFECTORS	2015-05-01	324/13356	2.00272e-05	0.000511389	0.000200457	DVL2/DVL3/BAIAP2/WASF1/DVL1	5
13	KEGG_PATHWAYS_IN_CANCER	KEGG_PATHWAYS_IN_CANCER	2015-05-01	325/13356	2.03272e-05	0.000511389	0.000200457	AKT1/DVL2/DVL3/PTEN/DVL1	5
13	REACTOME_NETRIN_1_SIGNALING	REACTOME_NETRIN_1_SIGNALING	2015-03-01	50/13356	2.17631e-05	0.000520137	0.000203886	TRPC1/TRPC5/TRPC4	3
13	KEGG_BASAL_CELL_CARCINOMA	KEGG_BASAL_CELL_CARCINOMA	2015-03-01	55/13356	2.90322e-05	0.000660828	0.000259034	DVL2/DVL3/DVL1	3
13	REACTOME_DEGRADATION_OF_DVL	REACTOME_DEGRADATION_OF_DVL	2015-03-01	57/13356	3.23361e-05	0.000702574	0.000275398	DVL2/DVL3/DVL1	3
13	WP_MALIGNANT_PLEURAL_MESOTHELIOMA	WP_MALIGNANT_PLEURAL_MESOTHELIOMA	2015-05-01	439/13356	8.57097e-05	0.00178127	0.00069823	AKT1/DVL2/DVL3/PTEN/DVL1	5
13	REACTOME_TCF_DEPENDENT_SIGNALING_IN_RESPONSE_TO_WNT	REACTOME_TCF_DEPENDENT_SIGNALING_IN_RESPONSE_TO_WNT	2015-04-01	234/13356	0.000107691	0.00214484	0.000840742	AKT1/DVL2/DVL3/DVL1	4
13	BIOCARTA_RACC_PATHWAY	BIOCARTA_RACC_PATHWAY	2015-02-01	15/13356	0.000122581	0.00225802	0.000885109	TRPC5/TRPC4	2
13	WP_NCRNAS_INVOLVED_IN_WNT_SIGNALING_IN_HEPATOCELLULAR_CARCINOMA	WP_NCRNAS_INVOLVED_IN_WNT_SIGNALING_IN_HEPATOCELLULAR_CARCINOMA	2015-03-01	89/13356	0.000122821	0.00225802	0.000885109	DVL2/DVL3/DVL1	3
13	REACTOME_PCP_CE_PATHWAY	REACTOME_PCP_CE_PATHWAY	2015-03-01	92/13356	0.000135542	0.0023996	0.000940604	DVL2/DVL3/DVL1	3
13	SA_PTEN_PATHWAY	SA_PTEN_PATHWAY	2015-02-01	17/13356	0.000158566	0.00244163	0.000957081	AKT1/PTEN	2
13	WP_LNCRNA_IN_CANONICAL_WNT_SIGNALING_AND_COLORECTAL_CANCER	WP_LNCRNA_IN_CANONICAL_WNT_SIGNALING_AND_COLORECTAL_CANCER	2015-03-01	98/13356	0.000163498	0.00244163	0.000957081	DVL2/DVL3/DVL1	3
13	WP_ALZHEIMERS_DISEASE	WP_ALZHEIMERS_DISEASE	2015-04-01	262/13356	0.000166585	0.00244163	0.000957081	AKT1/DVL2/DVL3/DVL1	4
13	PID_CXCR4_PATHWAY	PID_CXCR4_PATHWAY	2015-03-01	100/13356	0.000173587	0.00244163	0.000957081	AKT1/GNA13/PTEN	3
13	BIOCARTA_PTEN_PATHWAY	BIOCARTA_PTEN_PATHWAY	2015-02-01	18/13356	0.000178271	0.00244163	0.000957081	AKT1/PTEN	2
13	KEGG_MELANOGENESIS	KEGG_MELANOGENESIS	2015-03-01	101/13356	0.00017878	0.00244163	0.000957081	DVL2/DVL3/DVL1	3
13	WP_NEURAL_CREST_DIFFERENTIATION	WP_NEURAL_CREST_DIFFERENTIATION	2015-03-01	101/13356	0.00017878	0.00244163	0.000957081	DVL2/DVL3/DVL1	3
13	WP_WNT_SIGNALING_PATHWAY_AND_PLURIPOTENCY	WP_WNT_SIGNALING_PATHWAY_AND_PLURIPOTENCY	2015-03-01	101/13356	0.00017878	0.00244163	0.000957081	DVL2/DVL3/DVL1	3
13	BIOCARTA_IGF1MTOR_PATHWAY	BIOCARTA_IGF1MTOR_PATHWAY	2015-02-01	19/13356	0.000199115	0.0025946	0.00101704	AKT1/PTEN	2
13	REACTOME_SIGNALING_BY_VEGF	REACTOME_SIGNALING_BY_VEGF	2015-03-01	106/13356	0.000206265	0.0025946	0.00101704	AKT1/BAIAP2/WASF1	3
13	REACTOME_STIMULI_SENSING_CHANNELS	REACTOME_STIMULI_SENSING_CHANNELS	2015-03-01	106/13356	0.000206265	0.0025946	0.00101704	TRPC1/TRPC5/TRPC4	3
13	BIOCARTA_GSK3_PATHWAY	BIOCARTA_GSK3_PATHWAY	2015-02-01	20/13356	0.000221095	0.00270983	0.00106221	AKT1/DVL1	2
13	REACTOME_NEGATIVE_REGULATION_OF_THE_PI3K_AKT_NETWORK	REACTOME_NEGATIVE_REGULATION_OF_THE_PI3K_AKT_NETWORK	2015-03-01	113/13356	0.000249152	0.00297736	0.00116708	AKT1/PTEN/IL33	3
13	WP_WNT_SIGNALING	WP_WNT_SIGNALING	2015-03-01	114/13356	0.000255713	0.00298124	0.0011686	DVL2/DVL3/DVL1	3
13	BIOCARTA_MTOR_PATHWAY	BIOCARTA_MTOR_PATHWAY	2015-02-01	22/13356	0.000268456	0.00305529	0.00119762	AKT1/PTEN	2
13	BIOCARTA_EIF4_PATHWAY	BIOCARTA_EIF4_PATHWAY	2015-02-01	24/13356	0.000320337	0.00356095	0.00139584	AKT1/PTEN	2
13	WP_ALZHEIMERS_DISEASE_AND_MIRNA_EFFECTS	WP_ALZHEIMERS_DISEASE_AND_MIRNA_EFFECTS	2015-04-01	327/13356	0.000388884	0.00422469	0.00165601	AKT1/DVL2/DVL3/DVL1	4
13	REACTOME_SIGNALING_BY_WNT	REACTOME_SIGNALING_BY_WNT	2015-04-01	331/13356	0.000407267	0.00432608	0.00169576	AKT1/DVL2/DVL3/DVL1	4
13	WP_T_CELL_RECEPTOR_AND_COSTIMULATORY_SIGNALING	WP_T_CELL_RECEPTOR_AND_COSTIMULATORY_SIGNALING	2015-02-01	28/13356	0.000437585	0.00454708	0.00178238	AKT1/PTEN	2
13	REACTOME_RHO_GTPASES_ACTIVATE_FORMINS	REACTOME_RHO_GTPASES_ACTIVATE_FORMINS	2015-03-01	140/13356	0.000467678	0.00467737	0.00183345	DVL2/DVL3/DVL1	3
13	PID_S1P_S1P3_PATHWAY	PID_S1P_S1P3_PATHWAY	2015-02-01	29/13356	0.000469694	0.00467737	0.00183345	AKT1/GNA13	2
13	WP_PI3KAKTMTOR_SIGNALING_PATHWAY_AND_THERAPEUTIC_OPPORTUNITIES	WP_PI3KAKTMTOR_SIGNALING_PATHWAY_AND_THERAPEUTIC_OPPORTUNITIES	2015-02-01	30/13356	0.000502917	0.00490601	0.00192308	AKT1/PTEN	2
13	REACTOME_BETA_CATENIN_INDEPENDENT_WNT_SIGNALING	REACTOME_BETA_CATENIN_INDEPENDENT_WNT_SIGNALING	2015-03-01	146/13356	0.000528747	0.00503542	0.00197381	DVL2/DVL3/DVL1	3
13	REACTOME_FGFR1_MUTANT_RECEPTOR_ACTIVATION	REACTOME_FGFR1_MUTANT_RECEPTOR_ACTIVATION	2015-02-01	31/13356	0.000537252	0.00503542	0.00197381	ERLIN2/ZMYM2	2
13	WP_REGULATION_OF_ACTIN_CYTOSKELETON	WP_REGULATION_OF_ACTIN_CYTOSKELETON	2015-03-01	150/13356	0.000572177	0.00525962	0.00206169	GNA13/BAIAP2/WASF1	3
13	KEGG_WNT_SIGNALING_PATHWAY	KEGG_WNT_SIGNALING_PATHWAY	2015-03-01	151/13356	0.00058338	0.00526143	0.0020624	DVL2/DVL3/DVL1	3
13	SIG_REGULATION_OF_THE_ACTIN_CYTOSKELETON_BY_RHO_GTPASES	SIG_REGULATION_OF_THE_ACTIN_CYTOSKELETON_BY_RHO_GTPASES	2015-02-01	35/13356	0.000685671	0.0059794	0.00234383	AKT1/WASF1	2
13	WP_EGFEGFR_SIGNALING_PATHWAY	WP_EGFEGFR_SIGNALING_PATHWAY	2015-03-01	162/13356	0.000716029	0.0059794	0.00234383	AKT1/SH3KBP1/PTEN	3
13	REACTOME_RHO_GTPASES_ACTIVATE_WASPS_AND_WAVES	REACTOME_RHO_GTPASES_ACTIVATE_WASPS_AND_WAVES	2015-02-01	36/13356	0.000725533	0.0059794	0.00234383	BAIAP2/WASF1	2
13	SIG_PIP3_SIGNALING_IN_B_LYMPHOCYTES	SIG_PIP3_SIGNALING_IN_B_LYMPHOCYTES	2015-02-01	36/13356	0.000725533	0.0059794	0.00234383	AKT1/PTEN	2
13	WP_FACTORS_AND_PATHWAYS_AFFECTING_INSULINLIKE_GROWTH_FACTOR_IGF1AKT_SIGNALING	WP_FACTORS_AND_PATHWAYS_AFFECTING_INSULINLIKE_GROWTH_FACTOR_IGF1AKT_SIGNALING	2015-02-01	36/13356	0.000725533	0.0059794	0.00234383	AKT1/PTEN	2
13	REACTOME_SIGNALING_BY_FGFR1_IN_DISEASE	REACTOME_SIGNALING_BY_FGFR1_IN_DISEASE	2015-02-01	38/13356	0.000808553	0.00655065	0.00256775	ERLIN2/ZMYM2	2
13	PID_ER_NONGENOMIC_PATHWAY	PID_ER_NONGENOMIC_PATHWAY	2015-02-01	40/13356	0.000895952	0.00713775	0.00279788	AKT1/GNA13	2
13	REACTOME_ION_CHANNEL_TRANSPORT	REACTOME_ION_CHANNEL_TRANSPORT	2015-03-01	183/13356	0.00101978	0.0079871	0.00313082	TRPC1/TRPC5/TRPC4	3
13	REACTOME_RAC1_GTPASE_CYCLE	REACTOME_RAC1_GTPASE_CYCLE	2015-03-01	184/13356	0.00103598	0.0079871	0.00313082	GNA13/BAIAP2/WASF1	3
13	REACTOME_DISEASES_OF_SIGNAL_TRANSDUCTION_BY_GROWTH_FACTOR_RECEPTORS_AND_SECOND_MESSENGERS	REACTOME_DISEASES_OF_SIGNAL_TRANSDUCTION_BY_GROWTH_FACTOR_RECEPTORS_AND_SECOND_MESSENGERS	2015-04-01	432/13356	0.00110934	0.00841691	0.0032993	AKT1/PTEN/ERLIN2/ZMYM2	4
13	WP_INTEGRATED_CANCER_PATHWAY	WP_INTEGRATED_CANCER_PATHWAY	2015-02-01	48/13356	0.00128898	0.00962707	0.00377366	AKT1/PTEN	2
13	SIG_INSULIN_RECEPTOR_PATHWAY_IN_CARDIAC_MYOCYTES	SIG_INSULIN_RECEPTOR_PATHWAY_IN_CARDIAC_MYOCYTES	2015-02-01	51/13356	0.00145413	0.0105314	0.00412814	AKT1/PTEN	2
13	WP_SYNAPTIC_SIGNALING_PATHWAYS_ASSOCIATED_WITH_AUTISM_SPECTRUM_DISORDER	WP_SYNAPTIC_SIGNALING_PATHWAYS_ASSOCIATED_WITH_AUTISM_SPECTRUM_DISORDER	2015-02-01	51/13356	0.00145413	0.0105314	0.00412814	AKT1/PTEN	2
13	KEGG_ENDOMETRIAL_CANCER	KEGG_ENDOMETRIAL_CANCER	2015-02-01	52/13356	0.00151131	0.0106236	0.0041643	AKT1/PTEN	2
13	PID_KIT_PATHWAY	PID_KIT_PATHWAY	2015-02-01	52/13356	0.00151131	0.0106236	0.0041643	AKT1/PTEN	2
13	WP_COPPER_HOMEOSTASIS	WP_COPPER_HOMEOSTASIS	2015-02-01	53/13356	0.00156956	0.0107851	0.00422761	AKT1/PTEN	2
13	KEGG_REGULATION_OF_ACTIN_CYTOSKELETON	KEGG_REGULATION_OF_ACTIN_CYTOSKELETON	2015-03-01	213/13356	0.00157941	0.0107851	0.00422761	GNA13/BAIAP2/WASF1	3
13	PID_RAC1_PATHWAY	PID_RAC1_PATHWAY	2015-02-01	54/13356	0.00162887	0.0109662	0.00429858	BAIAP2/WASF1	2
13	PID_TXA2PATHWAY	PID_TXA2PATHWAY	2015-02-01	56/13356	0.00175067	0.0116225	0.00455584	AKT1/GNA13	2
13	WP_MODULATORS_OF_TCR_SIGNALING_AND_T_CELL_ACTIVATION	WP_MODULATORS_OF_TCR_SIGNALING_AND_T_CELL_ACTIVATION	2015-02-01	61/13356	0.00207361	0.0135779	0.00532232	AKT1/GNA13	2
13	PID_BCR_5PATHWAY	PID_BCR_5PATHWAY	2015-02-01	63/13356	0.00221012	0.0139005	0.00544877	AKT1/PTEN	2
13	REACTOME_SIGNALING_BY_FGFR_IN_DISEASE	REACTOME_SIGNALING_BY_FGFR_IN_DISEASE	2015-02-01	63/13356	0.00221012	0.0139005	0.00544877	ERLIN2/ZMYM2	2
13	WP_ENDOMETRIAL_CANCER	WP_ENDOMETRIAL_CANCER	2015-02-01	63/13356	0.00221012	0.0139005	0.00544877	AKT1/PTEN	2
13	PID_TCR_PATHWAY	PID_TCR_PATHWAY	2015-02-01	64/13356	0.00227994	0.014046	0.0055058	AKT1/PTEN	2
13	KEGG_GLIOMA	KEGG_GLIOMA	2015-02-01	65/13356	0.00235079	0.014046	0.0055058	AKT1/PTEN	2
13	PID_LYSOPHOSPHOLIPID_PATHWAY	PID_LYSOPHOSPHOLIPID_PATHWAY	2015-02-01	65/13356	0.00235079	0.014046	0.0055058	AKT1/GNA13	2
13	WP_PATHWAYS_AFFECTED_IN_ADENOID_CYSTIC_CARCINOMA	WP_PATHWAYS_AFFECTED_IN_ADENOID_CYSTIC_CARCINOMA	2015-02-01	65/13356	0.00235079	0.014046	0.0055058	AKT1/PTEN	2
13	WP_PHYSICOCHEMICAL_FEATURES_AND_TOXICITYASSOCIATED_PATHWAYS	WP_PHYSICOCHEMICAL_FEATURES_AND_TOXICITYASSOCIATED_PATHWAYS	2015-02-01	66/13356	0.00242268	0.0141225	0.00553578	AKT1/DVL1	2
13	WP_THYROID_STIMULATING_HORMONE_TSH_SIGNALING_PATHWAY	WP_THYROID_STIMULATING_HORMONE_TSH_SIGNALING_PATHWAY	2015-02-01	66/13356	0.00242268	0.0141225	0.00553578	AKT1/GNA13	2
13	SIG_PIP3_SIGNALING_IN_CARDIAC_MYOCTES	SIG_PIP3_SIGNALING_IN_CARDIAC_MYOCTES	2015-02-01	67/13356	0.00249561	0.0143723	0.00563371	AKT1/PTEN	2
13	WP_MELANOMA	WP_MELANOMA	2015-02-01	68/13356	0.00256957	0.0146221	0.00573161	AKT1/PTEN	2
13	REACTOME_REGULATION_OF_PTEN_STABILITY_AND_ACTIVITY	REACTOME_REGULATION_OF_PTEN_STABILITY_AND_ACTIVITY	2015-02-01	69/13356	0.00264455	0.0148717	0.00582948	AKT1/PTEN	2
13	KEGG_MELANOMA	KEGG_MELANOMA	2015-02-01	71/13356	0.00279762	0.0155495	0.00609517	AKT1/PTEN	2
13	KEGG_ADHERENS_JUNCTION	KEGG_ADHERENS_JUNCTION	2015-02-01	73/13356	0.00295477	0.0160498	0.00629126	BAIAP2/WASF1	2
13	WP_MECP2_AND_ASSOCIATED_RETT_SYNDROME	WP_MECP2_AND_ASSOCIATED_RETT_SYNDROME	2015-02-01	73/13356	0.00295477	0.0160498	0.00629126	AKT1/PTEN	2
13	WP_HEAD_AND_NECK_SQUAMOUS_CELL_CARCINOMA	WP_HEAD_AND_NECK_SQUAMOUS_CELL_CARCINOMA	2015-02-01	74/13356	0.00303488	0.0162997	0.00638923	AKT1/PTEN	2
13	WP_JOUBERT_SYNDROME	WP_JOUBERT_SYNDROME	2015-02-01	76/13356	0.00319815	0.0167991	0.00658498	DVL3/DVL1	2
13	WP_LEPTIN_SIGNALING_PATHWAY	WP_LEPTIN_SIGNALING_PATHWAY	2015-02-01	76/13356	0.00319815	0.0167991	0.00658498	AKT1/PTEN	2
13	PID_MET_PATHWAY	PID_MET_PATHWAY	2015-02-01	79/13356	0.00345066	0.0179284	0.00702766	AKT1/SH3KBP1	2
13	WP_GLIOBLASTOMA_SIGNALING_PATHWAYS	WP_GLIOBLASTOMA_SIGNALING_PATHWAYS	2015-02-01	83/13356	0.00380143	0.0195385	0.00765879	AKT1/PTEN	2
13	KEGG_SMALL_CELL_LUNG_CANCER	KEGG_SMALL_CELL_LUNG_CANCER	2015-02-01	84/13356	0.00389162	0.019581	0.00767545	AKT1/PTEN	2
13	WP_EGFR_TYROSINE_KINASE_INHIBITOR_RESISTANCE	WP_EGFR_TYROSINE_KINASE_INHIBITOR_RESISTANCE	2015-02-01	84/13356	0.00389162	0.019581	0.00767545	AKT1/PTEN	2
13	REACTOME_ANTIGEN_ACTIVATES_B_CELL_RECEPTOR_BCR_LEADING_TO_GENERATION_OF_SECOND_MESSENGERS	REACTOME_ANTIGEN_ACTIVATES_B_CELL_RECEPTOR_BCR_LEADING_TO_GENERATION_OF_SECOND_MESSENGERS	2015-02-01	86/13356	0.00407501	0.020081	0.00787142	SH3KBP1/TRPC1	2
13	WP_CLEAR_CELL_RENAL_CELL_CARCINOMA_PATHWAYS	WP_CLEAR_CELL_RENAL_CELL_CARCINOMA_PATHWAYS	2015-02-01	86/13356	0.00407501	0.020081	0.00787142	AKT1/PTEN	2
13	REACTOME_TP53_REGULATES_METABOLIC_GENES	REACTOME_TP53_REGULATES_METABOLIC_GENES	2015-02-01	87/13356	0.00416819	0.0203305	0.00796925	AKT1/PTEN	2
13	WP_TCELL_ACTIVATION_SARSCOV2	WP_TCELL_ACTIVATION_SARSCOV2	2015-02-01	88/13356	0.00426236	0.0205799	0.00806699	AKT1/PTEN	2
13	KEGG_PROSTATE_CANCER	KEGG_PROSTATE_CANCER	2015-02-01	89/13356	0.00435752	0.0206227	0.00808378	AKT1/PTEN	2
13	WNT_SIGNALING	WNT_SIGNALING	2015-02-01	89/13356	0.00435752	0.0206227	0.00808378	DVL2/DVL1	2
13	REACTOME_INTRACELLULAR_SIGNALING_BY_SECOND_MESSENGERS	REACTOME_INTRACELLULAR_SIGNALING_BY_SECOND_MESSENGERS	2015-03-01	307/13356	0.00445697	0.0208866	0.00818721	AKT1/PTEN/IL33	3
13	WP_ANDROGEN_RECEPTOR_SIGNALING_PATHWAY	WP_ANDROGEN_RECEPTOR_SIGNALING_PATHWAY	2015-02-01	91/13356	0.0045508	0.0211193	0.00827842	AKT1/PTEN	2
13	REACTOME_RAC3_GTPASE_CYCLE	REACTOME_RAC3_GTPASE_CYCLE	2015-02-01	94/13356	0.0048481	0.0222826	0.00873442	BAIAP2/WASF1	2
13	KEGG_FC_GAMMA_R_MEDIATED_PHAGOCYTOSIS	KEGG_FC_GAMMA_R_MEDIATED_PHAGOCYTOSIS	2015-02-01	96/13356	0.00505118	0.022778	0.0089286	AKT1/WASF1	2
13	WP_SMALL_CELL_LUNG_CANCER	WP_SMALL_CELL_LUNG_CANCER	2015-02-01	96/13356	0.00505118	0.022778	0.0089286	AKT1/PTEN	2
13	WP_MICRORNAS_IN_CARDIOMYOCYTE_HYPERTROPHY	WP_MICRORNAS_IN_CARDIOMYOCYTE_HYPERTROPHY	2015-02-01	104/13356	0.00590226	0.0261291	0.0102422	AKT1/DVL1	2
13	PID_ERBB1_DOWNSTREAM_PATHWAY	PID_ERBB1_DOWNSTREAM_PATHWAY	2015-02-01	105/13356	0.00601298	0.0261291	0.0102422	AKT1/BAIAP2	2
13	REACTOME_CARGO_RECOGNITION_FOR_CLATHRIN_MEDIATED_ENDOCYTOSIS	REACTOME_CARGO_RECOGNITION_FOR_CLATHRIN_MEDIATED_ENDOCYTOSIS	2015-02-01	105/13356	0.00601298	0.0261291	0.0102422	SH3KBP1/DVL2	2
13	REACTOME_PI3K_AKT_SIGNALING_IN_CANCER	REACTOME_PI3K_AKT_SIGNALING_IN_CANCER	2015-02-01	105/13356	0.00601298	0.0261291	0.0102422	AKT1/PTEN	2
13	REACTOME_PARASITE_INFECTION	REACTOME_PARASITE_INFECTION	2015-02-01	116/13356	0.0072934	0.0314076	0.0123113	BAIAP2/WASF1	2
13	WP_FRAGILE_X_SYNDROME	WP_FRAGILE_X_SYNDROME	2015-02-01	120/13356	0.00778714	0.0332344	0.0130274	AKT1/PTEN	2
13	PID_PDGFRB_PATHWAY	PID_PDGFRB_PATHWAY	2015-02-01	129/13356	0.00895201	0.0378678	0.0148436	PTEN/BAIAP2	2
13	KEGG_TIGHT_JUNCTION	KEGG_TIGHT_JUNCTION	2015-02-01	132/13356	0.00935671	0.0392325	0.0153785	AKT1/PTEN	2
13	REACTOME_PTEN_REGULATION	REACTOME_PTEN_REGULATION	2015-02-01	139/13356	0.0103325	0.0429472	0.0168346	AKT1/PTEN	2
13	REACTOME_FCGAMMA_RECEPTOR_FCGR_DEPENDENT_PHAGOCYTOSIS	REACTOME_FCGAMMA_RECEPTOR_FCGR_DEPENDENT_PHAGOCYTOSIS	2015-02-01	143/13356	0.0109097	0.0449554	0.0176218	BAIAP2/WASF1	2
13	REACTOME_AKT_PHOSPHORYLATES_TARGETS_IN_THE_NUCLEUS	REACTOME_AKT_PHOSPHORYLATES_TARGETS_IN_THE_NUCLEUS	2015-01-01	10/13356	0.0111781	0.0450026	0.0176403	AKT1	1
13	REACTOME_TETRAHYDROBIOPTERIN_BH4_SYNTHESIS_RECYCLING_SALVAGE_AND_REGULATION	REACTOME_TETRAHYDROBIOPTERIN_BH4_SYNTHESIS_RECYCLING_SALVAGE_AND_REGULATION	2015-01-01	10/13356	0.0111781	0.0450026	0.0176403	AKT1	1
13	REACTOME_CLATHRIN_MEDIATED_ENDOCYTOSIS	REACTOME_CLATHRIN_MEDIATED_ENDOCYTOSIS	2015-02-01	145/13356	0.0112036	0.0450026	0.0176403	SH3KBP1/DVL2	2
13	WP_VEGFAVEGFR2_SIGNALING_PATHWAY	WP_VEGFAVEGFR2_SIGNALING_PATHWAY	2015-03-01	431/13356	0.0113713	0.0452955	0.0177551	AKT1/WASF1/TRPC1	3
13	BIOCARTA_IL4_PATHWAY	BIOCARTA_IL4_PATHWAY	2015-01-01	11/13356	0.0122894	0.0477589	0.0187207	AKT1	1
13	BIOCARTA_MYOSIN_PATHWAY	BIOCARTA_MYOSIN_PATHWAY	2015-01-01	11/13356	0.0122894	0.0477589	0.0187207	GNA13	1
13	REACTOME_ENOS_ACTIVATION	REACTOME_ENOS_ACTIVATION	2015-01-01	11/13356	0.0122894	0.0477589	0.0187207	AKT1	1
13	REACTOME_CDC42_GTPASE_CYCLE	REACTOME_CDC42_GTPASE_CYCLE	2015-02-01	155/13356	0.0127254	0.0488729	0.0191574	GNA13/BAIAP2	2
13	REACTOME_RHO_GTPASE_CYCLE	REACTOME_RHO_GTPASE_CYCLE	2015-03-01	450/13356	0.0127806	0.0488729	0.0191574	GNA13/BAIAP2/WASF1	3
13	BIOCARTA_ACTINY_PATHWAY	BIOCARTA_ACTINY_PATHWAY	2015-01-01	12/13356	0.0133996	0.0488933	0.0191654	WASF1	1
13	BIOCARTA_CBL_PATHWAY	BIOCARTA_CBL_PATHWAY	2015-01-01	12/13356	0.0133996	0.0488933	0.0191654	SH3KBP1	1
13	BIOCARTA_HES_PATHWAY	BIOCARTA_HES_PATHWAY	2015-01-01	12/13356	0.0133996	0.0488933	0.0191654	DVL1	1
13	REACTOME_REGULATION_OF_LOCALIZATION_OF_FOXO_TRANSCRIPTION_FACTORS	REACTOME_REGULATION_OF_LOCALIZATION_OF_FOXO_TRANSCRIPTION_FACTORS	2015-01-01	12/13356	0.0133996	0.0488933	0.0191654	AKT1	1
13	REACTOME_SARS_COV_2_TARGETS_HOST_INTRACELLULAR_SIGNALLING_AND_REGULATORY_PATHWAYS	REACTOME_SARS_COV_2_TARGETS_HOST_INTRACELLULAR_SIGNALLING_AND_REGULATORY_PATHWAYS	2015-01-01	12/13356	0.0133996	0.0488933	0.0191654	AKT1	1
13	WP_RESOLVIN_E1_AND_RESOLVIN_D1_SIGNALING_PATHWAYS_PROMOTING_INFLAMMATION_RESOLUTION	WP_RESOLVIN_E1_AND_RESOLVIN_D1_SIGNALING_PATHWAYS_PROMOTING_INFLAMMATION_RESOLUTION	2015-01-01	12/13356	0.0133996	0.0488933	0.0191654	AKT1	1
13	WP_INSULIN_SIGNALING	WP_INSULIN_SIGNALING	2015-02-01	160/13356	0.0135186	0.0489536	0.019189	AKT1/PTEN	2
13	REACTOME_SIGNALING_BY_THE_B_CELL_RECEPTOR_BCR	REACTOME_SIGNALING_BY_THE_B_CELL_RECEPTOR_BCR	2015-02-01	166/13356	0.0144984	0.0513715	0.0201368	SH3KBP1/TRPC1	2
13	REACTOME_DOWNREGULATION_OF_ERBB2_ERBB3_SIGNALING	REACTOME_DOWNREGULATION_OF_ERBB2_ERBB3_SIGNALING	2015-01-01	13/13356	0.0145087	0.0513715	0.0201368	AKT1	1
13	WP_CELLTYPE_DEPENDENT_SELECTIVITY_OF_CCK2R_SIGNALING	WP_CELLTYPE_DEPENDENT_SELECTIVITY_OF_CCK2R_SIGNALING	2015-01-01	13/13356	0.0145087	0.0513715	0.0201368	TRPC1	1
13	BIOCARTA_ACH_PATHWAY	BIOCARTA_ACH_PATHWAY	2015-01-01	14/13356	0.0156165	0.0522008	0.0204619	AKT1	1
13	BIOCARTA_ERK5_PATHWAY	BIOCARTA_ERK5_PATHWAY	2015-01-01	14/13356	0.0156165	0.0522008	0.0204619	AKT1	1
13	BIOCARTA_PS1_PATHWAY	BIOCARTA_PS1_PATHWAY	2015-01-01	14/13356	0.0156165	0.0522008	0.0204619	DVL1	1
13	BIOCARTA_TRKA_PATHWAY	BIOCARTA_TRKA_PATHWAY	2015-01-01	14/13356	0.0156165	0.0522008	0.0204619	AKT1	1
13	PID_S1P_S1P4_PATHWAY	PID_S1P_S1P4_PATHWAY	2015-01-01	14/13356	0.0156165	0.0522008	0.0204619	GNA13	1
13	REACTOME_AKT_PHOSPHORYLATES_TARGETS_IN_THE_CYTOSOL	REACTOME_AKT_PHOSPHORYLATES_TARGETS_IN_THE_CYTOSOL	2015-01-01	14/13356	0.0156165	0.0522008	0.0204619	AKT1	1
13	REACTOME_REGULATION_OF_TP53_ACTIVITY_THROUGH_ASSOCIATION_WITH_CO_FACTORS	REACTOME_REGULATION_OF_TP53_ACTIVITY_THROUGH_ASSOCIATION_WITH_CO_FACTORS	2015-01-01	14/13356	0.0156165	0.0522008	0.0204619	AKT1	1
13	WP_MODULATION_OF_PI3KAKTMTOR_SIGNALING_BY_BIOACTIVE_SPHINGOLIPIDS	WP_MODULATION_OF_PI3KAKTMTOR_SIGNALING_BY_BIOACTIVE_SPHINGOLIPIDS	2015-01-01	14/13356	0.0156165	0.0522008	0.0204619	AKT1	1
13	BIOCARTA_BCELLSURVIVAL_PATHWAY	BIOCARTA_BCELLSURVIVAL_PATHWAY	2015-01-01	15/13356	0.0167233	0.0529385	0.0207511	AKT1	1
13	BIOCARTA_LONGEVITY_PATHWAY	BIOCARTA_LONGEVITY_PATHWAY	2015-01-01	15/13356	0.0167233	0.0529385	0.0207511	AKT1	1
13	PID_THROMBIN_PAR4_PATHWAY	PID_THROMBIN_PAR4_PATHWAY	2015-01-01	15/13356	0.0167233	0.0529385	0.0207511	GNA13	1
13	REACTOME_ACTIVATION_OF_BAD_AND_TRANSLOCATION_TO_MITOCHONDRIA	REACTOME_ACTIVATION_OF_BAD_AND_TRANSLOCATION_TO_MITOCHONDRIA	2015-01-01	15/13356	0.0167233	0.0529385	0.0207511	AKT1	1
13	REACTOME_INLB_MEDIATED_ENTRY_OF_LISTERIA_MONOCYTOGENES_INTO_HOST_CELL	REACTOME_INLB_MEDIATED_ENTRY_OF_LISTERIA_MONOCYTOGENES_INTO_HOST_CELL	2015-01-01	15/13356	0.0167233	0.0529385	0.0207511	SH3KBP1	1
13	REACTOME_METABOLISM_OF_NITRIC_OXIDE_NOS3_ACTIVATION_AND_REGULATION	REACTOME_METABOLISM_OF_NITRIC_OXIDE_NOS3_ACTIVATION_AND_REGULATION	2015-01-01	15/13356	0.0167233	0.0529385	0.0207511	AKT1	1
13	REACTOME_WNT5A_DEPENDENT_INTERNALIZATION_OF_FZD4	REACTOME_WNT5A_DEPENDENT_INTERNALIZATION_OF_FZD4	2015-01-01	15/13356	0.0167233	0.0529385	0.0207511	DVL2	1
13	WP_TRANSCRIPTION_FACTORS_REGULATE_MIRNAS_RELATED_TO_CARDIAC_HYPERTROPHY	WP_TRANSCRIPTION_FACTORS_REGULATE_MIRNAS_RELATED_TO_CARDIAC_HYPERTROPHY	2015-01-01	15/13356	0.0167233	0.0529385	0.0207511	AKT1	1
13	BIOCARTA_PITX2_PATHWAY	BIOCARTA_PITX2_PATHWAY	2015-01-01	16/13356	0.0178288	0.0560669	0.0219773	DVL1	1
13	BIOCARTA_GCR_PATHWAY	BIOCARTA_GCR_PATHWAY	2015-01-01	17/13356	0.0189332	0.0562116	0.0220341	AKT1	1
13	BIOCARTA_HCMV_PATHWAY	BIOCARTA_HCMV_PATHWAY	2015-01-01	17/13356	0.0189332	0.0562116	0.0220341	AKT1	1
13	BIOCARTA_TEL_PATHWAY	BIOCARTA_TEL_PATHWAY	2015-01-01	17/13356	0.0189332	0.0562116	0.0220341	AKT1	1
13	REACTOME_BUTYRATE_RESPONSE_FACTOR_1_BRF1_BINDS_AND_DESTABILIZES_MRNA	REACTOME_BUTYRATE_RESPONSE_FACTOR_1_BRF1_BINDS_AND_DESTABILIZES_MRNA	2015-01-01	17/13356	0.0189332	0.0562116	0.0220341	AKT1	1
13	REACTOME_KSRP_KHSRP_BINDS_AND_DESTABILIZES_MRNA	REACTOME_KSRP_KHSRP_BINDS_AND_DESTABILIZES_MRNA	2015-01-01	17/13356	0.0189332	0.0562116	0.0220341	AKT1	1
13	SA_TRKA_RECEPTOR	SA_TRKA_RECEPTOR	2015-01-01	17/13356	0.0189332	0.0562116	0.0220341	AKT1	1
13	WP_LEPTININSULIN_SIGNALING_OVERLAP	WP_LEPTININSULIN_SIGNALING_OVERLAP	2015-01-01	17/13356	0.0189332	0.0562116	0.0220341	AKT1	1
13	WP_REGULATION_OF_WNT_BCATENIN_SIGNALING_BY_SMALL_MOLECULE_COMPOUNDS	WP_REGULATION_OF_WNT_BCATENIN_SIGNALING_BY_SMALL_MOLECULE_COMPOUNDS	2015-01-01	17/13356	0.0189332	0.0562116	0.0220341	DVL2	1
13	WP_TGFBETA_SIGNALING_IN_THYROID_CELLS_FOR_EPITHELIALMESENCHYMAL_TRANSITION	WP_TGFBETA_SIGNALING_IN_THYROID_CELLS_FOR_EPITHELIALMESENCHYMAL_TRANSITION	2015-01-01	17/13356	0.0189332	0.0562116	0.0220341	AKT1	1
13	BIOCARTA_CHEMICAL_PATHWAY	BIOCARTA_CHEMICAL_PATHWAY	2015-01-01	18/13356	0.0200364	0.0580449	0.0227527	AKT1	1
13	REACTOME_SIGNALING_BY_CYTOSOLIC_FGFR1_FUSION_MUTANTS	REACTOME_SIGNALING_BY_CYTOSOLIC_FGFR1_FUSION_MUTANTS	2015-01-01	18/13356	0.0200364	0.0580449	0.0227527	ZMYM2	1
13	WP_4HYDROXYTAMOXIFEN_DEXAMETHASONE_AND_RETINOIC_ACIDS_REGULATION_OF_P27_EXPRESSION	WP_4HYDROXYTAMOXIFEN_DEXAMETHASONE_AND_RETINOIC_ACIDS_REGULATION_OF_P27_EXPRESSION	2015-01-01	18/13356	0.0200364	0.0580449	0.0227527	AKT1	1
13	WP_MAMMARY_GLAND_DEVELOPMENT_PATHWAY_EMBRYONIC_DEVELOPMENT_STAGE_1_OF_4	WP_MAMMARY_GLAND_DEVELOPMENT_PATHWAY_EMBRYONIC_DEVELOPMENT_STAGE_1_OF_4	2015-01-01	18/13356	0.0200364	0.0580449	0.0227527	AKT1	1
13	WP_FOCAL_ADHESION	WP_FOCAL_ADHESION	2015-02-01	198/13356	0.0202247	0.0582375	0.0228282	AKT1/PTEN	2
13	KEGG_FOCAL_ADHESION	KEGG_FOCAL_ADHESION	2015-02-01	199/13356	0.0204169	0.0584387	0.0229071	AKT1/PTEN	2
13	BIOCARTA_PAR1_PATHWAY	BIOCARTA_PAR1_PATHWAY	2015-01-01	19/13356	0.0211385	0.0594365	0.0232982	GNA13	1
13	REACTOME_METABOLISM_OF_COFACTORS	REACTOME_METABOLISM_OF_COFACTORS	2015-01-01	19/13356	0.0211385	0.0594365	0.0232982	AKT1	1
13	REACTOME_SIGNALING_BY_FLT3_FUSION_PROTEINS	REACTOME_SIGNALING_BY_FLT3_FUSION_PROTEINS	2015-01-01	19/13356	0.0211385	0.0594365	0.0232982	ZMYM2	1
13	REACTOME_LISTERIA_MONOCYTOGENES_ENTRY_INTO_HOST_CELLS	REACTOME_LISTERIA_MONOCYTOGENES_ENTRY_INTO_HOST_CELLS	2015-01-01	20/13356	0.0222394	0.0611584	0.0239731	SH3KBP1	1
13	REACTOME_SIGNALING_BY_HIPPO	REACTOME_SIGNALING_BY_HIPPO	2015-01-01	20/13356	0.0222394	0.0611584	0.0239731	DVL2	1
13	BIOCARTA_P53HYPOXIA_PATHWAY	BIOCARTA_P53HYPOXIA_PATHWAY	2015-01-01	21/13356	0.0233392	0.0611584	0.0239731	AKT1	1
13	BIOCARTA_RAC1_PATHWAY	BIOCARTA_RAC1_PATHWAY	2015-01-01	21/13356	0.0233392	0.0611584	0.0239731	WASF1	1
13	BIOCARTA_RHO_PATHWAY	BIOCARTA_RHO_PATHWAY	2015-01-01	21/13356	0.0233392	0.0611584	0.0239731	BAIAP2	1
13	PID_ECADHERIN_KERATINOCYTE_PATHWAY	PID_ECADHERIN_KERATINOCYTE_PATHWAY	2015-01-01	21/13356	0.0233392	0.0611584	0.0239731	AKT1	1
13	PID_S1P_META_PATHWAY	PID_S1P_META_PATHWAY	2015-01-01	21/13356	0.0233392	0.0611584	0.0239731	GNA13	1
13	REACTOME_CTLA4_INHIBITORY_SIGNALING	REACTOME_CTLA4_INHIBITORY_SIGNALING	2015-01-01	21/13356	0.0233392	0.0611584	0.0239731	AKT1	1
13	REACTOME_NEGATIVE_REGULATION_OF_MET_ACTIVITY	REACTOME_NEGATIVE_REGULATION_OF_MET_ACTIVITY	2015-01-01	21/13356	0.0233392	0.0611584	0.0239731	SH3KBP1	1
13	REACTOME_REGULATION_OF_GENE_EXPRESSION_IN_BETA_CELLS	REACTOME_REGULATION_OF_GENE_EXPRESSION_IN_BETA_CELLS	2015-01-01	21/13356	0.0233392	0.0611584	0.0239731	AKT1	1
13	WP_EXTRACELLULAR_VESICLES_IN_THE_CROSSTALK_OF_CARDIAC_CELLS	WP_EXTRACELLULAR_VESICLES_IN_THE_CROSSTALK_OF_CARDIAC_CELLS	2015-01-01	21/13356	0.0233392	0.0611584	0.0239731	PTEN	1
13	WP_HEMATOPOIETIC_STEM_CELL_GENE_REGULATION_BY_GABP_ALPHABETA_COMPLEX	WP_HEMATOPOIETIC_STEM_CELL_GENE_REGULATION_BY_GABP_ALPHABETA_COMPLEX	2015-01-01	21/13356	0.0233392	0.0611584	0.0239731	PTEN	1
13	WP_NETWORK_MAP_OF_SARSCOV2_SIGNALING_PATHWAY	WP_NETWORK_MAP_OF_SARSCOV2_SIGNALING_PATHWAY	2015-02-01	218/13356	0.0242137	0.0611584	0.0239731	AKT1/IL33	2
13	BIOCARTA_AKT_PATHWAY	BIOCARTA_AKT_PATHWAY	2015-01-01	22/13356	0.0244378	0.0611584	0.0239731	AKT1	1
13	BIOCARTA_CREB_PATHWAY	BIOCARTA_CREB_PATHWAY	2015-01-01	22/13356	0.0244378	0.0611584	0.0239731	AKT1	1
13	BIOCARTA_EDG1_PATHWAY	BIOCARTA_EDG1_PATHWAY	2015-01-01	22/13356	0.0244378	0.0611584	0.0239731	AKT1	1
13	BIOCARTA_RAS_PATHWAY	BIOCARTA_RAS_PATHWAY	2015-01-01	22/13356	0.0244378	0.0611584	0.0239731	AKT1	1
13	PID_HEDGEHOG_2PATHWAY	PID_HEDGEHOG_2PATHWAY	2015-01-01	22/13356	0.0244378	0.0611584	0.0239731	AKT1	1
13	REACTOME_CD28_DEPENDENT_PI3K_AKT_SIGNALING	REACTOME_CD28_DEPENDENT_PI3K_AKT_SIGNALING	2015-01-01	22/13356	0.0244378	0.0611584	0.0239731	AKT1	1
13	WP_HOSTPATHOGEN_INTERACTION_OF_HUMAN_CORONAVIRUSES_APOPTOSIS	WP_HOSTPATHOGEN_INTERACTION_OF_HUMAN_CORONAVIRUSES_APOPTOSIS	2015-01-01	22/13356	0.0244378	0.0611584	0.0239731	AKT1	1
13	WP_PI3KAKTMTOR_VITAMIN_D3_SIGNALING	WP_PI3KAKTMTOR_VITAMIN_D3_SIGNALING	2015-01-01	22/13356	0.0244378	0.0611584	0.0239731	AKT1	1
13	REACTOME_UB_SPECIFIC_PROCESSING_PROTEASES	REACTOME_UB_SPECIFIC_PROCESSING_PROTEASES	2015-02-01	221/13356	0.0248381	0.0612013	0.02399	PTEN/IL33	2
13	BIOCARTA_GLEEVEC_PATHWAY	BIOCARTA_GLEEVEC_PATHWAY	2015-01-01	23/13356	0.0255352	0.0612013	0.02399	AKT1	1
13	BIOCARTA_IGF1R_PATHWAY	BIOCARTA_IGF1R_PATHWAY	2015-01-01	23/13356	0.0255352	0.0612013	0.02399	AKT1	1
13	BIOCARTA_PTDINS_PATHWAY	BIOCARTA_PTDINS_PATHWAY	2015-01-01	23/13356	0.0255352	0.0612013	0.02399	AKT1	1
13	WP_ESTROGEN_SIGNALING_PATHWAY	WP_ESTROGEN_SIGNALING_PATHWAY	2015-01-01	23/13356	0.0255352	0.0612013	0.02399	AKT1	1
13	WP_REGULATION_OF_APOPTOSIS_BY_PARATHYROID_HORMONERELATED_PROTEIN	WP_REGULATION_OF_APOPTOSIS_BY_PARATHYROID_HORMONERELATED_PROTEIN	2015-01-01	23/13356	0.0255352	0.0612013	0.02399	AKT1	1
13	WP_ROLES_OF_CERAMIDES_IN_THE_DEVELOPMENT_OF_INSULIN_RESISTANCE	WP_ROLES_OF_CERAMIDES_IN_THE_DEVELOPMENT_OF_INSULIN_RESISTANCE	2015-01-01	23/13356	0.0255352	0.0612013	0.02399	AKT1	1
13	BIOCARTA_CTCF_PATHWAY	BIOCARTA_CTCF_PATHWAY	2015-01-01	24/13356	0.0266315	0.0612013	0.02399	PTEN	1
13	BIOCARTA_TFF_PATHWAY	BIOCARTA_TFF_PATHWAY	2015-01-01	24/13356	0.0266315	0.0612013	0.02399	AKT1	1
13	BIOCARTA_WNT_PATHWAY	BIOCARTA_WNT_PATHWAY	2015-01-01	24/13356	0.0266315	0.0612013	0.02399	DVL1	1
13	PID_S1P_S1P2_PATHWAY	PID_S1P_S1P2_PATHWAY	2015-01-01	24/13356	0.0266315	0.0612013	0.02399	GNA13	1
13	REACTOME_ESTROGEN_DEPENDENT_NUCLEAR_EVENTS_DOWNSTREAM_OF_ESR_MEMBRANE_SIGNALING	REACTOME_ESTROGEN_DEPENDENT_NUCLEAR_EVENTS_DOWNSTREAM_OF_ESR_MEMBRANE_SIGNALING	2015-01-01	24/13356	0.0266315	0.0612013	0.02399	AKT1	1
13	REACTOME_THROMBOXANE_SIGNALLING_THROUGH_TP_RECEPTOR	REACTOME_THROMBOXANE_SIGNALLING_THROUGH_TP_RECEPTOR	2015-01-01	24/13356	0.0266315	0.0612013	0.02399	GNA13	1
13	WP_ANGIOGENESIS	WP_ANGIOGENESIS	2015-01-01	24/13356	0.0266315	0.0612013	0.02399	AKT1	1
13	WP_DRAVET_SYNDROME	WP_DRAVET_SYNDROME	2015-01-01	24/13356	0.0266315	0.0612013	0.02399	AKT1	1
13	WP_KALLMANN_SYNDROME	WP_KALLMANN_SYNDROME	2015-01-01	24/13356	0.0266315	0.0612013	0.02399	AKT1	1
13	WP_LDL_INFLUENCE_ON_CD14_AND_TLR4	WP_LDL_INFLUENCE_ON_CD14_AND_TLR4	2015-01-01	24/13356	0.0266315	0.0612013	0.02399	AKT1	1
13	BIOCARTA_BAD_PATHWAY	BIOCARTA_BAD_PATHWAY	2015-01-01	25/13356	0.0277267	0.0616435	0.0241633	AKT1	1
13	BIOCARTA_HDAC_PATHWAY	BIOCARTA_HDAC_PATHWAY	2015-01-01	25/13356	0.0277267	0.0616435	0.0241633	AKT1	1
13	PID_LYMPH_ANGIOGENESIS_PATHWAY	PID_LYMPH_ANGIOGENESIS_PATHWAY	2015-01-01	25/13356	0.0277267	0.0616435	0.0241633	AKT1	1
13	REACTOME_G_BETA_GAMMA_SIGNALLING_THROUGH_PI3KGAMMA	REACTOME_G_BETA_GAMMA_SIGNALLING_THROUGH_PI3KGAMMA	2015-01-01	25/13356	0.0277267	0.0616435	0.0241633	AKT1	1
13	WP_IL7_SIGNALING_PATHWAY	WP_IL7_SIGNALING_PATHWAY	2015-01-01	25/13356	0.0277267	0.0616435	0.0241633	AKT1	1
13	WP_RELATIONSHIP_BETWEEN_INFLAMMATION_COX2_AND_EGFR	WP_RELATIONSHIP_BETWEEN_INFLAMMATION_COX2_AND_EGFR	2015-01-01	25/13356	0.0277267	0.0616435	0.0241633	AKT1	1
13	WP_S1P_RECEPTOR_SIGNAL_TRANSDUCTION	WP_S1P_RECEPTOR_SIGNAL_TRANSDUCTION	2015-01-01	25/13356	0.0277267	0.0616435	0.0241633	AKT1	1
13	BIOCARTA_RACCYCD_PATHWAY	BIOCARTA_RACCYCD_PATHWAY	2015-01-01	26/13356	0.0288207	0.0620554	0.0243247	AKT1	1
13	PID_INSULIN_GLUCOSE_PATHWAY	PID_INSULIN_GLUCOSE_PATHWAY	2015-01-01	26/13356	0.0288207	0.0620554	0.0243247	AKT1	1
13	PID_VEGFR1_PATHWAY	PID_VEGFR1_PATHWAY	2015-01-01	26/13356	0.0288207	0.0620554	0.0243247	AKT1	1
13	REACTOME_CONSTITUTIVE_SIGNALING_BY_AKT1_E17K_IN_CANCER	REACTOME_CONSTITUTIVE_SIGNALING_BY_AKT1_E17K_IN_CANCER	2015-01-01	26/13356	0.0288207	0.0620554	0.0243247	AKT1	1
13	REACTOME_SYNTHESIS_OF_IP3_AND_IP4_IN_THE_CYTOSOL	REACTOME_SYNTHESIS_OF_IP3_AND_IP4_IN_THE_CYTOSOL	2015-01-01	26/13356	0.0288207	0.0620554	0.0243247	PTEN	1
13	WP_EPO_RECEPTOR_SIGNALING	WP_EPO_RECEPTOR_SIGNALING	2015-01-01	26/13356	0.0288207	0.0620554	0.0243247	AKT1	1
13	WP_WNTBETACATENIN_SIGNALING_PATHWAY_IN_LEUKEMIA	WP_WNTBETACATENIN_SIGNALING_PATHWAY_IN_LEUKEMIA	2015-01-01	26/13356	0.0288207	0.0620554	0.0243247	AKT1	1
13	REACTOME_INTEGRIN_SIGNALING	REACTOME_INTEGRIN_SIGNALING	2015-01-01	27/13356	0.0299135	0.0632685	0.0248002	AKT1	1
13	REACTOME_VEGFR2_MEDIATED_VASCULAR_PERMEABILITY	REACTOME_VEGFR2_MEDIATED_VASCULAR_PERMEABILITY	2015-01-01	27/13356	0.0299135	0.0632685	0.0248002	AKT1	1
13	SIG_IL4RECEPTOR_IN_B_LYPHOCYTES	SIG_IL4RECEPTOR_IN_B_LYPHOCYTES	2015-01-01	27/13356	0.0299135	0.0632685	0.0248002	AKT1	1
13	WP_FOLLICLE_STIMULATING_HORMONE_FSH_SIGNALING_PATHWAY	WP_FOLLICLE_STIMULATING_HORMONE_FSH_SIGNALING_PATHWAY	2015-01-01	27/13356	0.0299135	0.0632685	0.0248002	AKT1	1
13	BIOCARTA_NO1_PATHWAY	BIOCARTA_NO1_PATHWAY	2015-01-01	28/13356	0.0310052	0.064437	0.0252583	AKT1	1
13	PID_IL8_CXCR1_PATHWAY	PID_IL8_CXCR1_PATHWAY	2015-01-01	28/13356	0.0310052	0.064437	0.0252583	AKT1	1
13	PID_REELIN_PATHWAY	PID_REELIN_PATHWAY	2015-01-01	28/13356	0.0310052	0.064437	0.0252583	AKT1	1
13	REACTOME_FLT3_SIGNALING_IN_DISEASE	REACTOME_FLT3_SIGNALING_IN_DISEASE	2015-01-01	28/13356	0.0310052	0.064437	0.0252583	ZMYM2	1
13	PID_IGF1_PATHWAY	PID_IGF1_PATHWAY	2015-01-01	29/13356	0.0320958	0.0658446	0.02581	AKT1	1
13	REACTOME_DOWNREGULATION_OF_ERBB2_SIGNALING	REACTOME_DOWNREGULATION_OF_ERBB2_SIGNALING	2015-01-01	29/13356	0.0320958	0.0658446	0.02581	AKT1	1
13	WP_LIPID_METABOLISM_PATHWAY	WP_LIPID_METABOLISM_PATHWAY	2015-01-01	29/13356	0.0320958	0.0658446	0.02581	AKT1	1
13	PID_RETINOIC_ACID_PATHWAY	PID_RETINOIC_ACID_PATHWAY	2015-01-01	30/13356	0.0331852	0.0666493	0.0261255	AKT1	1
13	REACTOME_ACTIVATION_OF_BH3_ONLY_PROTEINS	REACTOME_ACTIVATION_OF_BH3_ONLY_PROTEINS	2015-01-01	30/13356	0.0331852	0.0666493	0.0261255	AKT1	1
13	REACTOME_REGULATION_OF_TP53_ACTIVITY_THROUGH_ACETYLATION	REACTOME_REGULATION_OF_TP53_ACTIVITY_THROUGH_ACETYLATION	2015-01-01	30/13356	0.0331852	0.0666493	0.0261255	AKT1	1
13	WP_CELL_MIGRATION_AND_INVASION_THROUGH_P75NTR	WP_CELL_MIGRATION_AND_INVASION_THROUGH_P75NTR	2015-01-01	30/13356	0.0331852	0.0666493	0.0261255	AKT1	1
13	WP_EXTRACELLULAR_VESICLEMEDIATED_SIGNALING_IN_RECIPIENT_CELLS	WP_EXTRACELLULAR_VESICLEMEDIATED_SIGNALING_IN_RECIPIENT_CELLS	2015-01-01	30/13356	0.0331852	0.0666493	0.0261255	AKT1	1
13	REACTOME_PLATELET_ACTIVATION_SIGNALING_AND_AGGREGATION	REACTOME_PLATELET_ACTIVATION_SIGNALING_AND_AGGREGATION	2015-02-01	261/13356	0.0337844	0.0668682	0.0262113	AKT1/GNA13	2
13	PID_AR_NONGENOMIC_PATHWAY	PID_AR_NONGENOMIC_PATHWAY	2015-01-01	31/13356	0.0342735	0.0668682	0.0262113	AKT1	1
13	PID_AURORA_A_PATHWAY	PID_AURORA_A_PATHWAY	2015-01-01	31/13356	0.0342735	0.0668682	0.0262113	AKT1	1
13	PID_CD40_PATHWAY	PID_CD40_PATHWAY	2015-01-01	31/13356	0.0342735	0.0668682	0.0262113	AKT1	1
13	PID_NEPHRIN_NEPH1_PATHWAY	PID_NEPHRIN_NEPH1_PATHWAY	2015-01-01	31/13356	0.0342735	0.0668682	0.0262113	AKT1	1
13	REACTOME_EGFR_DOWNREGULATION	REACTOME_EGFR_DOWNREGULATION	2015-01-01	31/13356	0.0342735	0.0668682	0.0262113	SH3KBP1	1
13	WP_MIRNA_REGULATION_OF_P53_PATHWAY_IN_PROSTATE_CANCER	WP_MIRNA_REGULATION_OF_P53_PATHWAY_IN_PROSTATE_CANCER	2015-01-01	31/13356	0.0342735	0.0668682	0.0262113	PTEN	1
13	REACTOME_G_PROTEIN_BETA_GAMMA_SIGNALLING	REACTOME_G_PROTEIN_BETA_GAMMA_SIGNALLING	2015-01-01	32/13356	0.0353606	0.0676095	0.0265018	AKT1	1
13	REACTOME_THROMBIN_SIGNALLING_THROUGH_PROTEINASE_ACTIVATED_RECEPTORS_PARS	REACTOME_THROMBIN_SIGNALLING_THROUGH_PROTEINASE_ACTIVATED_RECEPTORS_PARS	2015-01-01	32/13356	0.0353606	0.0676095	0.0265018	GNA13	1
13	WP_DEVELOPMENT_AND_HETEROGENEITY_OF_THE_ILC_FAMILY	WP_DEVELOPMENT_AND_HETEROGENEITY_OF_THE_ILC_FAMILY	2015-01-01	32/13356	0.0353606	0.0676095	0.0265018	IL33	1
13	WP_IL17_SIGNALING_PATHWAY	WP_IL17_SIGNALING_PATHWAY	2015-01-01	32/13356	0.0353606	0.0676095	0.0265018	AKT1	1
13	WP_REGUCALCIN_IN_PROXIMAL_TUBULE_EPITHELIAL_KIDNEY_CELLS	WP_REGUCALCIN_IN_PROXIMAL_TUBULE_EPITHELIAL_KIDNEY_CELLS	2015-01-01	32/13356	0.0353606	0.0676095	0.0265018	AKT1	1
13	BIOCARTA_AGR_PATHWAY	BIOCARTA_AGR_PATHWAY	2015-01-01	33/13356	0.0364466	0.0677878	0.0265717	DVL1	1
13	BIOCARTA_MET_PATHWAY	BIOCARTA_MET_PATHWAY	2015-01-01	33/13356	0.0364466	0.0677878	0.0265717	PTEN	1
13	REACTOME_CD28_CO_STIMULATION	REACTOME_CD28_CO_STIMULATION	2015-01-01	33/13356	0.0364466	0.0677878	0.0265717	AKT1	1
13	REACTOME_SIGNAL_AMPLIFICATION	REACTOME_SIGNAL_AMPLIFICATION	2015-01-01	33/13356	0.0364466	0.0677878	0.0265717	GNA13	1
13	WP_ALPHA_6_BETA_4_SIGNALING_PATHWAY	WP_ALPHA_6_BETA_4_SIGNALING_PATHWAY	2015-01-01	33/13356	0.0364466	0.0677878	0.0265717	AKT1	1
13	WP_BDNFTRKB_SIGNALING	WP_BDNFTRKB_SIGNALING	2015-01-01	33/13356	0.0364466	0.0677878	0.0265717	AKT1	1
13	WP_RESISTIN_AS_A_REGULATOR_OF_INFLAMMATION	WP_RESISTIN_AS_A_REGULATOR_OF_INFLAMMATION	2015-01-01	33/13356	0.0364466	0.0677878	0.0265717	AKT1	1
13	PID_IL2_PI3K_PATHWAY	PID_IL2_PI3K_PATHWAY	2015-01-01	34/13356	0.0375314	0.0687357	0.0269433	AKT1	1
13	PID_IL8_CXCR2_PATHWAY	PID_IL8_CXCR2_PATHWAY	2015-01-01	34/13356	0.0375314	0.0687357	0.0269433	AKT1	1
13	WP_HEPATOCYTE_GROWTH_FACTOR_RECEPTOR_SIGNALING	WP_HEPATOCYTE_GROWTH_FACTOR_RECEPTOR_SIGNALING	2015-01-01	34/13356	0.0375314	0.0687357	0.0269433	PTEN	1
13	WP_TYPE_2_PAPILLARY_RENAL_CELL_CARCINOMA	WP_TYPE_2_PAPILLARY_RENAL_CELL_CARCINOMA	2015-01-01	34/13356	0.0375314	0.0687357	0.0269433	DVL2	1
13	PID_PI3KCI_AKT_PATHWAY	PID_PI3KCI_AKT_PATHWAY	2015-01-01	35/13356	0.0386151	0.0704505	0.0276155	AKT1	1
13	PID_PI3K_PLC_TRK_PATHWAY	PID_PI3K_PLC_TRK_PATHWAY	2015-01-01	36/13356	0.0396977	0.0718768	0.0281746	AKT1	1
13	WP_TARGET_OF_RAPAMYCIN_SIGNALING	WP_TARGET_OF_RAPAMYCIN_SIGNALING	2015-01-01	36/13356	0.0396977	0.0718768	0.0281746	AKT1	1
13	BIOCARTA_ALK_PATHWAY	BIOCARTA_ALK_PATHWAY	2015-01-01	37/13356	0.0407791	0.0727329	0.0285101	DVL1	1
13	BIOCARTA_IL2RB_PATHWAY	BIOCARTA_IL2RB_PATHWAY	2015-01-01	37/13356	0.0407791	0.0727329	0.0285101	AKT1	1
13	REACTOME_REGULATION_OF_TP53_EXPRESSION_AND_DEGRADATION	REACTOME_REGULATION_OF_TP53_EXPRESSION_AND_DEGRADATION	2015-01-01	37/13356	0.0407791	0.0727329	0.0285101	AKT1	1
13	WP_NEOVASCULARISATION_PROCESSES	WP_NEOVASCULARISATION_PROCESSES	2015-01-01	37/13356	0.0407791	0.0727329	0.0285101	AKT1	1
13	PID_FAS_PATHWAY	PID_FAS_PATHWAY	2015-01-01	38/13356	0.0418594	0.0735617	0.028835	AKT1	1
13	REACTOME_FLT3_SIGNALING	REACTOME_FLT3_SIGNALING	2015-01-01	38/13356	0.0418594	0.0735617	0.028835	AKT1	1
13	WP_G13_SIGNALING_PATHWAY	WP_G13_SIGNALING_PATHWAY	2015-01-01	38/13356	0.0418594	0.0735617	0.028835	GNA13	1
13	WP_MBDNF_AND_PROBDNF_REGULATION_OF_GABA_NEUROTRANSMISSION	WP_MBDNF_AND_PROBDNF_REGULATION_OF_GABA_NEUROTRANSMISSION	2015-01-01	38/13356	0.0418594	0.0735617	0.028835	PTEN	1
13	PID_ECADHERIN_NASCENT_AJ_PATHWAY	PID_ECADHERIN_NASCENT_AJ_PATHWAY	2015-01-01	39/13356	0.0429385	0.0743645	0.0291497	AKT1	1
13	REACTOME_OVARIAN_TUMOR_DOMAIN_PROTEASES	REACTOME_OVARIAN_TUMOR_DOMAIN_PROTEASES	2015-01-01	39/13356	0.0429385	0.0743645	0.0291497	PTEN	1
13	REACTOME_PLATELET_AGGREGATION_PLUG_FORMATION	REACTOME_PLATELET_AGGREGATION_PLUG_FORMATION	2015-01-01	39/13356	0.0429385	0.0743645	0.0291497	AKT1	1
13	WP_KISSPEPTINKISSPEPTIN_RECEPTOR_SYSTEM_IN_THE_OVARY	WP_KISSPEPTINKISSPEPTIN_RECEPTOR_SYSTEM_IN_THE_OVARY	2015-01-01	39/13356	0.0429385	0.0743645	0.0291497	AKT1	1
13	REACTOME_DEUBIQUITINATION	REACTOME_DEUBIQUITINATION	2015-02-01	299/13356	0.0432873	0.074698	0.0292804	PTEN/IL33	2
13	PID_IFNG_PATHWAY	PID_IFNG_PATHWAY	2015-01-01	40/13356	0.0440165	0.0749773	0.0293899	AKT1	1
13	WP_IL5_SIGNALING_PATHWAY	WP_IL5_SIGNALING_PATHWAY	2015-01-01	40/13356	0.0440165	0.0749773	0.0293899	AKT1	1
13	WP_NEURAL_CREST_CELL_MIGRATION_DURING_DEVELOPMENT	WP_NEURAL_CREST_CELL_MIGRATION_DURING_DEVELOPMENT	2015-01-01	40/13356	0.0440165	0.0749773	0.0293899	AKT1	1
13	WP_FOCAL_ADHESION_PI3KAKTMTORSIGNALING_PATHWAY	WP_FOCAL_ADHESION_PI3KAKTMTORSIGNALING_PATHWAY	2015-02-01	302/13356	0.0440766	0.0749773	0.0293899	AKT1/PTEN	2
13	PID_AMB2_NEUTROPHILS_PATHWAY	PID_AMB2_NEUTROPHILS_PATHWAY	2015-01-01	41/13356	0.0450934	0.0758967	0.0297503	AKT1	1
13	PID_ERBB1_INTERNALIZATION_PATHWAY	PID_ERBB1_INTERNALIZATION_PATHWAY	2015-01-01	41/13356	0.0450934	0.0758967	0.0297503	SH3KBP1	1
13	REACTOME_MTOR_SIGNALLING	REACTOME_MTOR_SIGNALLING	2015-01-01	41/13356	0.0450934	0.0758967	0.0297503	AKT1	1
13	REACTOME_DEACTIVATION_OF_THE_BETA_CATENIN_TRANSACTIVATING_COMPLEX	REACTOME_DEACTIVATION_OF_THE_BETA_CATENIN_TRANSACTIVATING_COMPLEX	2015-01-01	42/13356	0.0461692	0.076628	0.030037	AKT1	1
13	REACTOME_REGULATION_OF_BETA_CELL_DEVELOPMENT	REACTOME_REGULATION_OF_BETA_CELL_DEVELOPMENT	2015-01-01	42/13356	0.0461692	0.076628	0.030037	AKT1	1
13	WP_IL2_SIGNALING_PATHWAY	WP_IL2_SIGNALING_PATHWAY	2015-01-01	42/13356	0.0461692	0.076628	0.030037	AKT1	1
13	WP_TNFRELATED_WEAK_INDUCER_OF_APOPTOSIS_TWEAK_SIGNALING_PATHWAY	WP_TNFRELATED_WEAK_INDUCER_OF_APOPTOSIS_TWEAK_SIGNALING_PATHWAY	2015-01-01	42/13356	0.0461692	0.076628	0.030037	AKT1	1
13	PID_CXCR3_PATHWAY	PID_CXCR3_PATHWAY	2015-01-01	43/13356	0.0472438	0.0770735	0.0302116	AKT1	1
13	PID_THROMBIN_PAR1_PATHWAY	PID_THROMBIN_PAR1_PATHWAY	2015-01-01	43/13356	0.0472438	0.0770735	0.0302116	GNA13	1
13	WP_FIBRIN_COMPLEMENT_RECEPTOR_3_SIGNALING_PATHWAY	WP_FIBRIN_COMPLEMENT_RECEPTOR_3_SIGNALING_PATHWAY	2015-01-01	43/13356	0.0472438	0.0770735	0.0302116	AKT1	1
13	WP_IL6_SIGNALING_PATHWAY	WP_IL6_SIGNALING_PATHWAY	2015-01-01	43/13356	0.0472438	0.0770735	0.0302116	AKT1	1
13	WP_NEURAL_CREST_CELL_MIGRATION_IN_CANCER	WP_NEURAL_CREST_CELL_MIGRATION_IN_CANCER	2015-01-01	43/13356	0.0472438	0.0770735	0.0302116	AKT1	1
13	PID_CERAMIDE_PATHWAY	PID_CERAMIDE_PATHWAY	2015-01-01	44/13356	0.0483173	0.0777632	0.0304819	AKT1	1
13	PID_ERBB2_ERBB3_PATHWAY	PID_ERBB2_ERBB3_PATHWAY	2015-01-01	44/13356	0.0483173	0.0777632	0.0304819	AKT1	1
13	PID_INSULIN_PATHWAY	PID_INSULIN_PATHWAY	2015-01-01	44/13356	0.0483173	0.0777632	0.0304819	AKT1	1
13	WP_INTERLEUKIN11_SIGNALING_PATHWAY	WP_INTERLEUKIN11_SIGNALING_PATHWAY	2015-01-01	44/13356	0.0483173	0.0777632	0.0304819	AKT1	1
13	PID_HNF3B_PATHWAY	PID_HNF3B_PATHWAY	2015-01-01	45/13356	0.0493896	0.0786942	0.0308469	AKT1	1
13	PID_ILK_PATHWAY	PID_ILK_PATHWAY	2015-01-01	45/13356	0.0493896	0.0786942	0.0308469	AKT1	1
13	PID_RHOA_PATHWAY	PID_RHOA_PATHWAY	2015-01-01	45/13356	0.0493896	0.0786942	0.0308469	PTEN	1
13	PID_A6B1_A6B4_INTEGRIN_PATHWAY	PID_A6B1_A6B4_INTEGRIN_PATHWAY	2015-01-01	46/13356	0.0504609	0.0793431	0.0311012	AKT1	1
13	PID_PS1_PATHWAY	PID_PS1_PATHWAY	2015-01-01	46/13356	0.0504609	0.0793431	0.0311012	DVL1	1
13	SIG_BCR_SIGNALING_PATHWAY	SIG_BCR_SIGNALING_PATHWAY	2015-01-01	46/13356	0.0504609	0.0793431	0.0311012	AKT1	1
13	WP_TRANSLATION_INHIBITORS_IN_CHRONICALLY_ACTIVATED_PDGFRA_CELLS	WP_TRANSLATION_INHIBITORS_IN_CHRONICALLY_ACTIVATED_PDGFRA_CELLS	2015-01-01	46/13356	0.0504609	0.0793431	0.0311012	AKT1	1
13	PID_IL6_7_PATHWAY	PID_IL6_7_PATHWAY	2015-01-01	47/13356	0.051531	0.0804961	0.0315532	AKT1	1
13	WP_THYMIC_STROMAL_LYMPHOPOIETIN_TSLP_SIGNALING_PATHWAY	WP_THYMIC_STROMAL_LYMPHOPOIETIN_TSLP_SIGNALING_PATHWAY	2015-01-01	47/13356	0.051531	0.0804961	0.0315532	AKT1	1
13	PID_AJDISS_2PATHWAY	PID_AJDISS_2PATHWAY	2015-01-01	48/13356	0.0525999	0.0811057	0.0317922	GNA13	1
13	PID_HEDGEHOG_GLI_PATHWAY	PID_HEDGEHOG_GLI_PATHWAY	2015-01-01	48/13356	0.0525999	0.0811057	0.0317922	AKT1	1
13	PID_PI3KCI_PATHWAY	PID_PI3KCI_PATHWAY	2015-01-01	48/13356	0.0525999	0.0811057	0.0317922	PTEN	1
13	REACTOME_INOSITOL_PHOSPHATE_METABOLISM	REACTOME_INOSITOL_PHOSPHATE_METABOLISM	2015-01-01	48/13356	0.0525999	0.0811057	0.0317922	PTEN	1
13	PID_ANGIOPOIETIN_RECEPTOR_PATHWAY	PID_ANGIOPOIETIN_RECEPTOR_PATHWAY	2015-01-01	49/13356	0.0536678	0.0816981	0.0320244	AKT1	1
13	PID_FOXO_PATHWAY	PID_FOXO_PATHWAY	2015-01-01	49/13356	0.0536678	0.0816981	0.0320244	AKT1	1
13	WP_IL3_SIGNALING_PATHWAY	WP_IL3_SIGNALING_PATHWAY	2015-01-01	49/13356	0.0536678	0.0816981	0.0320244	AKT1	1
13	WP_PHOSPHOINOSITIDES_METABOLISM	WP_PHOSPHOINOSITIDES_METABOLISM	2015-01-01	49/13356	0.0536678	0.0816981	0.0320244	PTEN	1
13	WP_PI3KAKT_SIGNALING_PATHWAY	WP_PI3KAKT_SIGNALING_PATHWAY	2015-02-01	339/13356	0.054252	0.0823253	0.0322702	AKT1/PTEN	2
13	REACTOME_SIGNALING_BY_EGFR	REACTOME_SIGNALING_BY_EGFR	2015-01-01	50/13356	0.0547345	0.0825335	0.0323518	SH3KBP1	1
13	REACTOME_SIGNALING_BY_ERBB2	REACTOME_SIGNALING_BY_ERBB2	2015-01-01	50/13356	0.0547345	0.0825335	0.0323518	AKT1	1
13	BIOCARTA_NFAT_PATHWAY	BIOCARTA_NFAT_PATHWAY	2015-01-01	51/13356	0.0558001	0.0838757	0.0328779	AKT1	1
13	KEGG_MTOR_SIGNALING_PATHWAY	KEGG_MTOR_SIGNALING_PATHWAY	2015-01-01	52/13356	0.0568646	0.0846769	0.033192	AKT1	1
13	PID_PTP1B_PATHWAY	PID_PTP1B_PATHWAY	2015-01-01	52/13356	0.0568646	0.0846769	0.033192	AKT1	1
13	WP_NETRINUNC5B_SIGNALING_PATHWAY	WP_NETRINUNC5B_SIGNALING_PATHWAY	2015-01-01	52/13356	0.0568646	0.0846769	0.033192	AKT1	1
13	PID_CD8_TCR_PATHWAY	PID_CD8_TCR_PATHWAY	2015-01-01	53/13356	0.057928	0.0849247	0.0332891	AKT1	1
13	REACTOME_SYNTHESIS_OF_PIPS_AT_THE_PLASMA_MEMBRANE	REACTOME_SYNTHESIS_OF_PIPS_AT_THE_PLASMA_MEMBRANE	2015-01-01	53/13356	0.057928	0.0849247	0.0332891	PTEN	1
13	WP_APOPTOSISRELATED_NETWORK_DUE_TO_ALTERED_NOTCH3_IN_OVARIAN_CANCER	WP_APOPTOSISRELATED_NETWORK_DUE_TO_ALTERED_NOTCH3_IN_OVARIAN_CANCER	2015-01-01	53/13356	0.057928	0.0849247	0.0332891	AKT1	1
13	WP_CCL18_SIGNALING_PATHWAY	WP_CCL18_SIGNALING_PATHWAY	2015-01-01	53/13356	0.057928	0.0849247	0.0332891	PTEN	1
13	KEGG_INOSITOL_PHOSPHATE_METABOLISM	KEGG_INOSITOL_PHOSPHATE_METABOLISM	2015-01-01	54/13356	0.0589902	0.0849247	0.0332891	PTEN	1
13	KEGG_NON_SMALL_CELL_LUNG_CANCER	KEGG_NON_SMALL_CELL_LUNG_CANCER	2015-01-01	54/13356	0.0589902	0.0849247	0.0332891	AKT1	1
13	REACTOME_ION_HOMEOSTASIS	REACTOME_ION_HOMEOSTASIS	2015-01-01	54/13356	0.0589902	0.0849247	0.0332891	TRPC1	1
13	REACTOME_NEGATIVE_REGULATION_OF_NOTCH4_SIGNALING	REACTOME_NEGATIVE_REGULATION_OF_NOTCH4_SIGNALING	2015-01-01	54/13356	0.0589902	0.0849247	0.0332891	AKT1	1
13	REACTOME_SIGNALING_BY_PTK6	REACTOME_SIGNALING_BY_PTK6	2015-01-01	54/13356	0.0589902	0.0849247	0.0332891	AKT1	1
13	WP_IL4_SIGNALING_PATHWAY	WP_IL4_SIGNALING_PATHWAY	2015-01-01	54/13356	0.0589902	0.0849247	0.0332891	AKT1	1
13	WP_NRP1TRIGGERED_SIGNALING_PATHWAYS_IN_PANCREATIC_CANCER	WP_NRP1TRIGGERED_SIGNALING_PATHWAYS_IN_PANCREATIC_CANCER	2015-01-01	54/13356	0.0589902	0.0849247	0.0332891	AKT1	1
13	KEGG_CYTOSOLIC_DNA_SENSING_PATHWAY	KEGG_CYTOSOLIC_DNA_SENSING_PATHWAY	2015-01-01	55/13356	0.0600514	0.0849247	0.0332891	IL33	1
13	PID_FGF_PATHWAY	PID_FGF_PATHWAY	2015-01-01	55/13356	0.0600514	0.0849247	0.0332891	AKT1	1
13	REACTOME_INTRINSIC_PATHWAY_FOR_APOPTOSIS	REACTOME_INTRINSIC_PATHWAY_FOR_APOPTOSIS	2015-01-01	55/13356	0.0600514	0.0849247	0.0332891	AKT1	1
13	WP_CARDIAC_HYPERTROPHIC_RESPONSE	WP_CARDIAC_HYPERTROPHIC_RESPONSE	2015-01-01	55/13356	0.0600514	0.0849247	0.0332891	AKT1	1
13	WP_IL1_SIGNALING_PATHWAY	WP_IL1_SIGNALING_PATHWAY	2015-01-01	55/13356	0.0600514	0.0849247	0.0332891	AKT1	1
13	WP_RANKLRANK_SIGNALING_PATHWAY	WP_RANKLRANK_SIGNALING_PATHWAY	2015-01-01	55/13356	0.0600514	0.0849247	0.0332891	AKT1	1
13	WP_HEPATITIS_C_AND_HEPATOCELLULAR_CARCINOMA	WP_HEPATITIS_C_AND_HEPATOCELLULAR_CARCINOMA	2015-01-01	56/13356	0.0611114	0.0861325	0.0337626	AKT1	1
13	REACTOME_TRANSCRIPTIONAL_REGULATION_BY_TP53	REACTOME_TRANSCRIPTIONAL_REGULATION_BY_TP53	2015-02-01	363/13356	0.0612658	0.0861325	0.0337626	AKT1/PTEN	2
13	KEGG_ACUTE_MYELOID_LEUKEMIA	KEGG_ACUTE_MYELOID_LEUKEMIA	2015-01-01	57/13356	0.0621703	0.0871478	0.0341606	AKT1	1
13	PID_P53_REGULATION_PATHWAY	PID_P53_REGULATION_PATHWAY	2015-01-01	59/13356	0.0642847	0.089067	0.0349128	AKT1	1
13	REACTOME_NRAGE_SIGNALS_DEATH_THROUGH_JNK	REACTOME_NRAGE_SIGNALS_DEATH_THROUGH_JNK	2015-01-01	59/13356	0.0642847	0.089067	0.0349128	GNA13	1
13	WP_KIT_RECEPTOR_SIGNALING_PATHWAY	WP_KIT_RECEPTOR_SIGNALING_PATHWAY	2015-01-01	59/13356	0.0642847	0.089067	0.0349128	AKT1	1
13	WP_MET_IN_TYPE_1_PAPILLARY_RENAL_CELL_CARCINOMA	WP_MET_IN_TYPE_1_PAPILLARY_RENAL_CELL_CARCINOMA	2015-01-01	59/13356	0.0642847	0.089067	0.0349128	AKT1	1
13	PID_FCER1_PATHWAY	PID_FCER1_PATHWAY	2015-01-01	60/13356	0.0653403	0.0902678	0.0353835	AKT1	1
13	PID_AR_PATHWAY	PID_AR_PATHWAY	2015-01-01	61/13356	0.0663947	0.0906762	0.0355436	AKT1	1
13	REACTOME_DEFECTIVE_CFTR_CAUSES_CYSTIC_FIBROSIS	REACTOME_DEFECTIVE_CFTR_CAUSES_CYSTIC_FIBROSIS	2015-01-01	61/13356	0.0663947	0.0906762	0.0355436	ERLIN2	1
13	REACTOME_REGULATION_OF_PTEN_GENE_TRANSCRIPTION	REACTOME_REGULATION_OF_PTEN_GENE_TRANSCRIPTION	2015-01-01	61/13356	0.0663947	0.0906762	0.0355436	PTEN	1
13	WP_NOTCH_SIGNALING_PATHWAY	WP_NOTCH_SIGNALING_PATHWAY	2015-01-01	61/13356	0.0663947	0.0906762	0.0355436	AKT1	1
13	KEGG_COLORECTAL_CANCER	KEGG_COLORECTAL_CANCER	2015-01-01	62/13356	0.0674481	0.0915914	0.0359024	AKT1	1
13	WP_TCELL_ANTIGEN_RECEPTOR_TCR_PATHWAY_DURING_STAPHYLOCOCCUS_AUREUS_INFECTION	WP_TCELL_ANTIGEN_RECEPTOR_TCR_PATHWAY_DURING_STAPHYLOCOCCUS_AUREUS_INFECTION	2015-01-01	62/13356	0.0674481	0.0915914	0.0359024	AKT1	1
13	PID_ENDOTHELIN_PATHWAY	PID_ENDOTHELIN_PATHWAY	2015-01-01	63/13356	0.0685003	0.0919751	0.0360528	AKT1	1
13	REACTOME_TRANSCRIPTIONAL_REGULATION_BY_MECP2	REACTOME_TRANSCRIPTIONAL_REGULATION_BY_MECP2	2015-01-01	63/13356	0.0685003	0.0919751	0.0360528	PTEN	1
13	WP_ENDOCHONDRAL_OSSIFICATION	WP_ENDOCHONDRAL_OSSIFICATION	2015-01-01	63/13356	0.0685003	0.0919751	0.0360528	AKT1	1
13	WP_ENDOCHONDRAL_OSSIFICATION_WITH_SKELETAL_DYSPLASIAS	WP_ENDOCHONDRAL_OSSIFICATION_WITH_SKELETAL_DYSPLASIAS	2015-01-01	63/13356	0.0685003	0.0919751	0.0360528	AKT1	1
13	PID_IL4_2PATHWAY	PID_IL4_2PATHWAY	2015-01-01	64/13356	0.0695514	0.0928647	0.0364015	AKT1	1
13	REACTOME_ASYMMETRIC_LOCALIZATION_OF_PCP_PROTEINS	REACTOME_ASYMMETRIC_LOCALIZATION_OF_PCP_PROTEINS	2015-01-01	64/13356	0.0695514	0.0928647	0.0364015	DVL2	1
13	WP_ONCOSTATIN_M_SIGNALING_PATHWAY	WP_ONCOSTATIN_M_SIGNALING_PATHWAY	2015-01-01	65/13356	0.0706014	0.0940041	0.0368481	AKT1	1
13	PID_HIF1_TFPATHWAY	PID_HIF1_TFPATHWAY	2015-01-01	66/13356	0.0716503	0.0946101	0.0370857	AKT1	1
13	REACTOME_FOXO_MEDIATED_TRANSCRIPTION	REACTOME_FOXO_MEDIATED_TRANSCRIPTION	2015-01-01	66/13356	0.0716503	0.0946101	0.0370857	AKT1	1
13	WP_AGERAGE_PATHWAY	WP_AGERAGE_PATHWAY	2015-01-01	66/13356	0.0716503	0.0946101	0.0370857	AKT1	1
13	KEGG_ADIPOCYTOKINE_SIGNALING_PATHWAY	KEGG_ADIPOCYTOKINE_SIGNALING_PATHWAY	2015-01-01	67/13356	0.0726981	0.0952047	0.0373187	AKT1	1
13	PID_TELOMERASE_PATHWAY	PID_TELOMERASE_PATHWAY	2015-01-01	67/13356	0.0726981	0.0952047	0.0373187	AKT1	1
13	WP_AMPACTIVATED_PROTEIN_KINASE_SIGNALING	WP_AMPACTIVATED_PROTEIN_KINASE_SIGNALING	2015-01-01	67/13356	0.0726981	0.0952047	0.0373187	AKT1	1
13	KEGG_P53_SIGNALING_PATHWAY	KEGG_P53_SIGNALING_PATHWAY	2015-01-01	68/13356	0.0737448	0.0957881	0.0375474	PTEN	1
13	PID_P75_NTR_PATHWAY	PID_P75_NTR_PATHWAY	2015-01-01	68/13356	0.0737448	0.0957881	0.0375474	AKT1	1
13	WP_RAC1PAK1P38MMP2_PATHWAY	WP_RAC1PAK1P38MMP2_PATHWAY	2015-01-01	68/13356	0.0737448	0.0957881	0.0375474	AKT1	1
13	PID_MTOR_4PATHWAY	PID_MTOR_4PATHWAY	2015-01-01	69/13356	0.0747904	0.0966211	0.0378739	AKT1	1
13	PID_VEGFR1_2_PATHWAY	PID_VEGFR1_2_PATHWAY	2015-01-01	69/13356	0.0747904	0.0966211	0.0378739	AKT1	1
13	KEGG_LONG_TERM_DEPRESSION	KEGG_LONG_TERM_DEPRESSION	2015-01-01	70/13356	0.0758349	0.0966642	0.0378908	GNA13	1
13	KEGG_PANCREATIC_CANCER	KEGG_PANCREATIC_CANCER	2015-01-01	70/13356	0.0758349	0.0966642	0.0378908	AKT1	1
13	KEGG_RENAL_CELL_CARCINOMA	KEGG_RENAL_CELL_CARCINOMA	2015-01-01	70/13356	0.0758349	0.0966642	0.0378908	AKT1	1
13	PID_AP1_PATHWAY	PID_AP1_PATHWAY	2015-01-01	70/13356	0.0758349	0.0966642	0.0378908	PTEN	1
13	PID_CDC42_PATHWAY	PID_CDC42_PATHWAY	2015-01-01	70/13356	0.0758349	0.0966642	0.0378908	BAIAP2	1
13	WP_3Q29_COPY_NUMBER_VARIATION_SYNDROME	WP_3Q29_COPY_NUMBER_VARIATION_SYNDROME	2015-01-01	71/13356	0.0768783	0.0974743	0.0382084	AKT1	1
13	WP_STEROL_REGULATORY_ELEMENTBINDING_PROTEINS_SREBP_SIGNALING	WP_STEROL_REGULATORY_ELEMENTBINDING_PROTEINS_SREBP_SIGNALING	2015-01-01	71/13356	0.0768783	0.0974743	0.0382084	AKT1	1
13	REACTOME_TRANSLOCATION_OF_SLC2A4_GLUT4_TO_THE_PLASMA_MEMBRANE	REACTOME_TRANSLOCATION_OF_SLC2A4_GLUT4_TO_THE_PLASMA_MEMBRANE	2015-01-01	72/13356	0.0779206	0.0980159	0.0384207	AKT1	1
13	WP_NONSMALL_CELL_LUNG_CANCER	WP_NONSMALL_CELL_LUNG_CANCER	2015-01-01	72/13356	0.0779206	0.0980159	0.0384207	AKT1	1
13	WP_PRIMARY_FOCAL_SEGMENTAL_GLOMERULOSCLEROSIS_FSGS	WP_PRIMARY_FOCAL_SEGMENTAL_GLOMERULOSCLEROSIS_FSGS	2015-01-01	72/13356	0.0779206	0.0980159	0.0384207	AKT1	1
13	KEGG_CHRONIC_MYELOID_LEUKEMIA	KEGG_CHRONIC_MYELOID_LEUKEMIA	2015-01-01	73/13356	0.0789618	0.098291	0.0385285	AKT1	1
13	PID_E2F_PATHWAY	PID_E2F_PATHWAY	2015-01-01	73/13356	0.0789618	0.098291	0.0385285	WASF1	1
13	WP_CHROMOSOMAL_AND_MICROSATELLITE_INSTABILITY_IN_COLORECTAL_CANCER	WP_CHROMOSOMAL_AND_MICROSATELLITE_INSTABILITY_IN_COLORECTAL_CANCER	2015-01-01	73/13356	0.0789618	0.098291	0.0385285	AKT1	1
13	WP_CYTOSOLIC_DNASENSING_PATHWAY	WP_CYTOSOLIC_DNASENSING_PATHWAY	2015-01-01	73/13356	0.0789618	0.098291	0.0385285	IL33	1
13	PID_AVB3_INTEGRIN_PATHWAY	PID_AVB3_INTEGRIN_PATHWAY	2015-01-01	74/13356	0.0800019	0.0990697	0.0388337	AKT1	1
13	REACTOME_COSTIMULATION_BY_THE_CD28_FAMILY	REACTOME_COSTIMULATION_BY_THE_CD28_FAMILY	2015-01-01	74/13356	0.0800019	0.0990697	0.0388337	AKT1	1
13	KEGG_B_CELL_RECEPTOR_SIGNALING_PATHWAY	KEGG_B_CELL_RECEPTOR_SIGNALING_PATHWAY	2015-01-01	75/13356	0.0810409	0.099839	0.0391353	AKT1	1
13	REACTOME_EXTRA_NUCLEAR_ESTROGEN_SIGNALING	REACTOME_EXTRA_NUCLEAR_ESTROGEN_SIGNALING	2015-01-01	75/13356	0.0810409	0.099839	0.0391353	AKT1	1
13	KEGG_PHOSPHATIDYLINOSITOL_SIGNALING_SYSTEM	KEGG_PHOSPHATIDYLINOSITOL_SIGNALING_SYSTEM	2015-01-01	76/13356	0.0820788	0.100086	0.0392321	PTEN	1
13	KEGG_VEGF_SIGNALING_PATHWAY	KEGG_VEGF_SIGNALING_PATHWAY	2015-01-01	76/13356	0.0820788	0.100086	0.0392321	AKT1	1
13	REACTOME_CELL_DEATH_SIGNALLING_VIA_NRAGE_NRIF_AND_NADE	REACTOME_CELL_DEATH_SIGNALLING_VIA_NRAGE_NRIF_AND_NADE	2015-01-01	76/13356	0.0820788	0.100086	0.0392321	GNA13	1
13	WP_PROLACTIN_SIGNALING_PATHWAY	WP_PROLACTIN_SIGNALING_PATHWAY	2015-01-01	76/13356	0.0820788	0.100086	0.0392321	AKT1	1
13	REACTOME_SARS_COV_INFECTIONS	REACTOME_SARS_COV_INFECTIONS	2015-02-01	432/13356	0.0830505	0.100836	0.039526	AKT1/SH3KBP1	2
13	WP_16P112_PROXIMAL_DELETION_SYNDROME	WP_16P112_PROXIMAL_DELETION_SYNDROME	2015-01-01	77/13356	0.0831156	0.100836	0.039526	PTEN	1
13	REACTOME_ABC_TRANSPORTER_DISORDERS	REACTOME_ABC_TRANSPORTER_DISORDERS	2015-01-01	78/13356	0.0841513	0.101834	0.0399172	ERLIN2	1
13	KEGG_FC_EPSILON_RI_SIGNALING_PATHWAY	KEGG_FC_EPSILON_RI_SIGNALING_PATHWAY	2015-01-01	79/13356	0.0851859	0.102566	0.0402044	AKT1	1
13	REACTOME_SIGNALING_BY_MET	REACTOME_SIGNALING_BY_MET	2015-01-01	79/13356	0.0851859	0.102566	0.0402044	SH3KBP1	1
13	PID_BETA_CATENIN_NUC_PATHWAY	PID_BETA_CATENIN_NUC_PATHWAY	2015-01-01	80/13356	0.0862194	0.103032	0.040387	DVL3	1
13	REACTOME_G_ALPHA_12_13_SIGNALLING_EVENTS	REACTOME_G_ALPHA_12_13_SIGNALLING_EVENTS	2015-01-01	80/13356	0.0862194	0.103032	0.040387	GNA13	1
13	WP_CLOCKCONTROLLED_AUTOPHAGY_IN_BONE_METABOLISM	WP_CLOCKCONTROLLED_AUTOPHAGY_IN_BONE_METABOLISM	2015-01-01	80/13356	0.0862194	0.103032	0.040387	AKT1	1
13	PID_REG_GR_PATHWAY	PID_REG_GR_PATHWAY	2015-01-01	82/13356	0.0882832	0.104713	0.0410459	AKT1	1
13	PID_SMAD2_3NUCLEAR_PATHWAY	PID_SMAD2_3NUCLEAR_PATHWAY	2015-01-01	82/13356	0.0882832	0.104713	0.0410459	AKT1	1
13	REACTOME_SIGNALING_BY_NOTCH4	REACTOME_SIGNALING_BY_NOTCH4	2015-01-01	82/13356	0.0882832	0.104713	0.0410459	AKT1	1
13	REACTOME_PI_METABOLISM	REACTOME_PI_METABOLISM	2015-01-01	84/13356	0.0903427	0.106891	0.0418994	PTEN	1
13	KEGG_PROGESTERONE_MEDIATED_OOCYTE_MATURATION	KEGG_PROGESTERONE_MEDIATED_OOCYTE_MATURATION	2015-01-01	85/13356	0.0913708	0.10731	0.0420639	AKT1	1
13	REACTOME_CYCLIN_A_CDK2_ASSOCIATED_EVENTS_AT_S_PHASE_ENTRY	REACTOME_CYCLIN_A_CDK2_ASSOCIATED_EVENTS_AT_S_PHASE_ENTRY	2015-01-01	85/13356	0.0913708	0.10731	0.0420639	AKT1	1
13	WP_ACUTE_VIRAL_MYOCARDITIS	WP_ACUTE_VIRAL_MYOCARDITIS	2015-01-01	85/13356	0.0913708	0.10731	0.0420639	AKT1	1
13	KEGG_APOPTOSIS	KEGG_APOPTOSIS	2015-01-01	87/13356	0.0934237	0.108918	0.0426943	AKT1	1
13	KEGG_ERBB_SIGNALING_PATHWAY	KEGG_ERBB_SIGNALING_PATHWAY	2015-01-01	87/13356	0.0934237	0.108918	0.0426943	AKT1	1
13	REACTOME_REGULATION_OF_MRNA_STABILITY_BY_PROTEINS_THAT_BIND_AU_RICH_ELEMENTS	REACTOME_REGULATION_OF_MRNA_STABILITY_BY_PROTEINS_THAT_BIND_AU_RICH_ELEMENTS	2015-01-01	87/13356	0.0934237	0.108918	0.0426943	AKT1	1
13	WP_APOPTOSIS	WP_APOPTOSIS	2015-01-01	88/13356	0.0944486	0.109845	0.0430576	AKT1	1
13	WP_PANCREATIC_ADENOCARCINOMA_PATHWAY	WP_PANCREATIC_ADENOCARCINOMA_PATHWAY	2015-01-01	89/13356	0.0954723	0.110766	0.0434187	AKT1	1
13	REACTOME_RAB_GEFS_EXCHANGE_GTP_FOR_GDP_ON_RABS	REACTOME_RAB_GEFS_EXCHANGE_GTP_FOR_GDP_ON_RABS	2015-01-01	90/13356	0.096495	0.111412	0.0436718	AKT1	1
13	WP_TCELL_RECEPTOR_SIGNALING_PATHWAY	WP_TCELL_RECEPTOR_SIGNALING_PATHWAY	2015-01-01	90/13356	0.096495	0.111412	0.0436718	AKT1	1
13	REACTOME_SIGNALING_BY_INTERLEUKINS	REACTOME_SIGNALING_BY_INTERLEUKINS	2015-02-01	474/13356	0.0973518	0.11205	0.043922	AKT1/IL33	2
13	WP_G_PROTEIN_SIGNALING_PATHWAYS	WP_G_PROTEIN_SIGNALING_PATHWAYS	2015-01-01	91/13356	0.0975166	0.11205	0.043922	GNA13	1
13	WP_CORTICOTROPINRELEASING_HORMONE_SIGNALING_PATHWAY	WP_CORTICOTROPINRELEASING_HORMONE_SIGNALING_PATHWAY	2015-01-01	92/13356	0.0985371	0.112412	0.0440638	AKT1	1
13	WP_ERBB_SIGNALING_PATHWAY	WP_ERBB_SIGNALING_PATHWAY	2015-01-01	92/13356	0.0985371	0.112412	0.0440638	AKT1	1
13	WP_TNFALPHA_SIGNALING_PATHWAY	WP_TNFALPHA_SIGNALING_PATHWAY	2015-01-01	92/13356	0.0985371	0.112412	0.0440638	AKT1	1
13	WP_P53_TRANSCRIPTIONAL_GENE_NETWORK	WP_P53_TRANSCRIPTIONAL_GENE_NETWORK	2015-01-01	96/13356	0.102608	0.116778	0.0457752	PTEN	1
13	REACTOME_P75_NTR_RECEPTOR_MEDIATED_SIGNALLING	REACTOME_P75_NTR_RECEPTOR_MEDIATED_SIGNALLING	2015-01-01	97/13356	0.103624	0.117375	0.046009	GNA13	1
13	WP_B_CELL_RECEPTOR_SIGNALING_PATHWAY	WP_B_CELL_RECEPTOR_SIGNALING_PATHWAY	2015-01-01	97/13356	0.103624	0.117375	0.046009	AKT1	1
13	KEGG_TOLL_LIKE_RECEPTOR_SIGNALING_PATHWAY	KEGG_TOLL_LIKE_RECEPTOR_SIGNALING_PATHWAY	2015-01-01	102/13356	0.108683	0.122237	0.0479149	AKT1	1
13	REACTOME_KEAP1_NFE2L2_PATHWAY	REACTOME_KEAP1_NFE2L2_PATHWAY	2015-01-01	102/13356	0.108683	0.122237	0.0479149	AKT1	1
13	WP_INTEGRINMEDIATED_CELL_ADHESION	WP_INTEGRINMEDIATED_CELL_ADHESION	2015-01-01	102/13356	0.108683	0.122237	0.0479149	AKT1	1
13	REACTOME_ABC_FAMILY_PROTEINS_MEDIATED_TRANSPORT	REACTOME_ABC_FAMILY_PROTEINS_MEDIATED_TRANSPORT	2015-01-01	103/13356	0.109692	0.122793	0.0481331	ERLIN2	1
13	WP_TOLLLIKE_RECEPTOR_SIGNALING_PATHWAY	WP_TOLLLIKE_RECEPTOR_SIGNALING_PATHWAY	2015-01-01	103/13356	0.109692	0.122793	0.0481331	AKT1	1
13	KEGG_T_CELL_RECEPTOR_SIGNALING_PATHWAY	KEGG_T_CELL_RECEPTOR_SIGNALING_PATHWAY	2015-01-01	108/13356	0.11472	0.128122	0.0502216	AKT1	1
13	REACTOME_INTERLEUKIN_4_AND_INTERLEUKIN_13_SIGNALING	REACTOME_INTERLEUKIN_4_AND_INTERLEUKIN_13_SIGNALING	2015-01-01	111/13356	0.117724	0.13117	0.0514165	AKT1	1
13	WP_BURN_WOUND_HEALING	WP_BURN_WOUND_HEALING	2015-01-01	113/13356	0.119721	0.133085	0.0521673	AKT1	1
13	KEGG_VASCULAR_SMOOTH_MUSCLE_CONTRACTION	KEGG_VASCULAR_SMOOTH_MUSCLE_CONTRACTION	2015-01-01	115/13356	0.121714	0.134674	0.0527902	GNA13	1
13	WP_GASTRIN_SIGNALING_PATHWAY	WP_GASTRIN_SIGNALING_PATHWAY	2015-01-01	115/13356	0.121714	0.134674	0.0527902	AKT1	1
13	REACTOME_TRANSCRIPTIONAL_REGULATION_BY_RUNX2	REACTOME_TRANSCRIPTIONAL_REGULATION_BY_RUNX2	2015-01-01	120/13356	0.126678	0.139843	0.0548164	AKT1	1
13	REACTOME_RAB_REGULATION_OF_TRAFFICKING	REACTOME_RAB_REGULATION_OF_TRAFFICKING	2015-01-01	122/13356	0.128657	0.1417	0.0555442	AKT1	1
13	REACTOME_TCR_SIGNALING	REACTOME_TCR_SIGNALING	2015-01-01	124/13356	0.130631	0.143544	0.0562669	PTEN	1
13	KEGG_NEUROTROPHIN_SIGNALING_PATHWAY	KEGG_NEUROTROPHIN_SIGNALING_PATHWAY	2015-01-01	126/13356	0.132601	0.145374	0.0569845	AKT1	1
13	WP_OVERVIEW_OF_PROINFLAMMATORY_AND_PROFIBROTIC_MEDIATORS	WP_OVERVIEW_OF_PROINFLAMMATORY_AND_PROFIBROTIC_MEDIATORS	2015-01-01	128/13356	0.134567	0.147192	0.0576969	IL33	1
13	WP_EBOLA_VIRUS_INFECTION_IN_HOST	WP_EBOLA_VIRUS_INFECTION_IN_HOST	2015-01-01	129/13356	0.135548	0.147927	0.057985	AKT1	1
13	REACTOME_CARDIAC_CONDUCTION	REACTOME_CARDIAC_CONDUCTION	2015-01-01	130/13356	0.136528	0.148657	0.0582713	TRPC1	1
13	WP_ADIPOGENESIS	WP_ADIPOGENESIS	2015-01-01	131/13356	0.137508	0.149383	0.0585559	DVL1	1
13	WP_ANGIOPOIETINLIKE_PROTEIN_8_REGULATORY_PATHWAY	WP_ANGIOPOIETINLIKE_PROTEIN_8_REGULATORY_PATHWAY	2015-01-01	132/13356	0.138486	0.149765	0.0587057	AKT1	1
13	WP_TGFBETA_SIGNALING_PATHWAY	WP_TGFBETA_SIGNALING_PATHWAY	2015-01-01	132/13356	0.138486	0.149765	0.0587057	AKT1	1
13	KEGG_INSULIN_SIGNALING_PATHWAY	KEGG_INSULIN_SIGNALING_PATHWAY	2015-01-01	137/13356	0.143362	0.15434	0.0604988	AKT1	1
13	PID_P53_DOWNSTREAM_PATHWAY	PID_P53_DOWNSTREAM_PATHWAY	2015-01-01	137/13356	0.143362	0.15434	0.0604988	PTEN	1
13	WP_NEUROINFLAMMATION_AND_GLUTAMATERGIC_SIGNALING	WP_NEUROINFLAMMATION_AND_GLUTAMATERGIC_SIGNALING	2015-01-01	140/13356	0.146275	0.157122	0.0615894	AKT1	1
13	REACTOME_DEATH_RECEPTOR_SIGNALLING	REACTOME_DEATH_RECEPTOR_SIGNALLING	2015-01-01	141/13356	0.147244	0.157808	0.0618584	GNA13	1
13	WP_BRAINDERIVED_NEUROTROPHIC_FACTOR_BDNF_SIGNALING_PATHWAY	WP_BRAINDERIVED_NEUROTROPHIC_FACTOR_BDNF_SIGNALING_PATHWAY	2015-01-01	144/13356	0.150145	0.160557	0.0629359	AKT1	1
13	REACTOME_MITOTIC_G1_PHASE_AND_G1_S_TRANSITION	REACTOME_MITOTIC_G1_PHASE_AND_G1_S_TRANSITION	2015-01-01	149/13356	0.154959	0.165335	0.0648088	AKT1	1
13	WP_HEPATITIS_B_INFECTION	WP_HEPATITIS_B_INFECTION	2015-01-01	151/13356	0.156877	0.16701	0.0654651	AKT1	1
13	REACTOME_INTERLEUKIN_1_FAMILY_SIGNALING	REACTOME_INTERLEUKIN_1_FAMILY_SIGNALING	2015-01-01	152/13356	0.157835	0.167656	0.0657184	IL33	1
13	REACTOME_POTENTIAL_THERAPEUTICS_FOR_SARS	REACTOME_POTENTIAL_THERAPEUTICS_FOR_SARS	2015-01-01	154/13356	0.159747	0.169311	0.0663672	SH3KBP1	1
13	KEGG_JAK_STAT_SIGNALING_PATHWAY	KEGG_JAK_STAT_SIGNALING_PATHWAY	2015-01-01	155/13356	0.160702	0.169571	0.066469	AKT1	1
13	WP_NONALCOHOLIC_FATTY_LIVER_DISEASE	WP_NONALCOHOLIC_FATTY_LIVER_DISEASE	2015-01-01	155/13356	0.160702	0.169571	0.066469	AKT1	1
13	REACTOME_REGULATION_OF_TP53_ACTIVITY	REACTOME_REGULATION_OF_TP53_ACTIVITY	2015-01-01	160/13356	0.16546	0.174207	0.0682864	AKT1	1
13	WP_EPITHELIAL_TO_MESENCHYMAL_TRANSITION_IN_COLORECTAL_CANCER	WP_EPITHELIAL_TO_MESENCHYMAL_TRANSITION_IN_COLORECTAL_CANCER	2015-01-01	161/13356	0.166409	0.174821	0.068527	AKT1	1
13	REACTOME_S_PHASE	REACTOME_S_PHASE	2015-01-01	163/13356	0.168303	0.176423	0.069155	AKT1	1
13	WP_CHEMOKINE_SIGNALING_PATHWAY	WP_CHEMOKINE_SIGNALING_PATHWAY	2015-01-01	165/13356	0.170193	0.178014	0.0697787	AKT1	1
13	REACTOME_DISORDERS_OF_TRANSMEMBRANE_TRANSPORTERS	REACTOME_DISORDERS_OF_TRANSMEMBRANE_TRANSPORTERS	2015-01-01	177/13356	0.181451	0.189374	0.0742317	ERLIN2	1
13	KEGG_CALCIUM_SIGNALING_PATHWAY	KEGG_CALCIUM_SIGNALING_PATHWAY	2015-01-01	178/13356	0.182382	0.189932	0.0744503	TRPC1	1
13	REACTOME_APOPTOSIS	REACTOME_APOPTOSIS	2015-01-01	179/13356	0.183313	0.190486	0.0746676	AKT1	1
13	KEGG_ENDOCYTOSIS	KEGG_ENDOCYTOSIS	2015-01-01	181/13356	0.185171	0.192	0.0752609	SH3KBP1	1
13	WP_RAS_SIGNALING	WP_RAS_SIGNALING	2015-01-01	184/13356	0.187952	0.194461	0.0762255	AKT1	1
13	KEGG_CHEMOKINE_SIGNALING_PATHWAY	KEGG_CHEMOKINE_SIGNALING_PATHWAY	2015-01-01	189/13356	0.192565	0.198376	0.0777601	AKT1	1
13	REACTOME_METABOLISM_OF_VITAMINS_AND_COFACTORS	REACTOME_METABOLISM_OF_VITAMINS_AND_COFACTORS	2015-01-01	189/13356	0.192565	0.198376	0.0777601	AKT1	1
13	REACTOME_CELLULAR_RESPONSE_TO_CHEMICAL_STRESS	REACTOME_CELLULAR_RESPONSE_TO_CHEMICAL_STRESS	2015-01-01	194/13356	0.197155	0.202667	0.0794421	AKT1	1
13	WP_CIRCADIAN_RHYTHM_GENES	WP_CIRCADIAN_RHYTHM_GENES	2015-01-01	201/13356	0.203539	0.208781	0.0818387	PTEN	1
13	REACTOME_MUSCLE_CONTRACTION	REACTOME_MUSCLE_CONTRACTION	2015-01-01	203/13356	0.205355	0.210192	0.0823918	TRPC1	1
13	REACTOME_SARS_COV_2_HOST_INTERACTIONS	REACTOME_SARS_COV_2_HOST_INTERACTIONS	2015-01-01	204/13356	0.206261	0.210668	0.0825785	AKT1	1
13	REACTOME_PROGRAMMED_CELL_DEATH	REACTOME_PROGRAMMED_CELL_DEATH	2015-01-01	208/13356	0.209876	0.213904	0.0838468	AKT1	1
13	REACTOME_PHOSPHOLIPID_METABOLISM	REACTOME_PHOSPHOLIPID_METABOLISM	2015-01-01	211/13356	0.212577	0.216196	0.0847453	PTEN	1
13	WP_CILIARY_LANDSCAPE	WP_CILIARY_LANDSCAPE	2015-01-01	215/13356	0.216166	0.219379	0.0859929	DVL3	1
13	REACTOME_ESR_MEDIATED_SIGNALING	REACTOME_ESR_MEDIATED_SIGNALING	2015-01-01	221/13356	0.22152	0.224336	0.0879361	AKT1	1
13	REACTOME_SIGNALING_BY_NOTCH	REACTOME_SIGNALING_BY_NOTCH	2015-01-01	247/13356	0.244329	0.246391	0.0965812	AKT1	1
13	WP_MAPK_SIGNALING_PATHWAY	WP_MAPK_SIGNALING_PATHWAY	2015-01-01	247/13356	0.244329	0.246391	0.0965812	AKT1	1
13	KEGG_MAPK_SIGNALING_PATHWAY	KEGG_MAPK_SIGNALING_PATHWAY	2015-01-01	267/13356	0.261448	0.263099	0.103131	AKT1	1
13	WP_IL18_SIGNALING_PATHWAY	WP_IL18_SIGNALING_PATHWAY	2015-01-01	273/13356	0.266513	0.267632	0.104908	PTEN	1
13	REACTOME_SARS_COV_2_INFECTION	REACTOME_SARS_COV_2_INFECTION	2015-01-01	289/13356	0.27986	0.280447	0.109931	AKT1	1
13	REACTOME_SIGNALING_BY_NUCLEAR_RECEPTORS	REACTOME_SIGNALING_BY_NUCLEAR_RECEPTORS	2015-01-01	297/13356	0.286449	0.286449	0.112284	AKT1	1
16	REACTOME_TOLL_LIKE_RECEPTOR_9_TLR9_CASCADE	REACTOME_TOLL_LIKE_RECEPTOR_9_TLR9_CASCADE	2023-07-06	106/13356	1.50667e-12	1.68747e-10	9.51579e-12	MYD88/PIK3C3/PIK3R4/TLR9/IRAK4/IRAK1	6
16	REACTOME_TRAF6_MEDIATED_IRF7_ACTIVATION_IN_TLR7_8_OR_9_SIGNALING	REACTOME_TRAF6_MEDIATED_IRF7_ACTIVATION_IN_TLR7_8_OR_9_SIGNALING	2023-07-04	13/13356	1.88526e-11	8.71172e-10	4.91263e-11	MYD88/TLR9/IRAK4/IRAK1	4
16	REACTOME_TOLL_LIKE_RECEPTOR_CASCADES	REACTOME_TOLL_LIKE_RECEPTOR_CASCADES	2023-07-06	166/13356	2.3335e-11	8.71172e-10	4.91263e-11	MYD88/PIK3C3/PIK3R4/TLR9/IRAK4/IRAK1	6
16	WP_TOLLLIKE_RECEPTOR_SIGNALING_RELATED_TO_MYD88	WP_TOLLLIKE_RECEPTOR_SIGNALING_RELATED_TO_MYD88	2023-07-04	31/13356	8.26965e-10	2.3155e-08	1.30573e-09	MYD88/TLR9/IRAK4/IRAK1	4
16	WP_MYD88_DISTINCT_INPUTOUTPUT_PATHWAY	WP_MYD88_DISTINCT_INPUTOUTPUT_PATHWAY	2023-07-03	18/13356	7.16991e-08	1.58897e-06	8.96037e-08	MYD88/TLR9/IRAK1	3
16	WP_LTF_DANGER_SIGNAL_RESPONSE_PATHWAY	WP_LTF_DANGER_SIGNAL_RESPONSE_PATHWAY	2023-07-03	19/13356	8.51235e-08	1.58897e-06	8.96037e-08	MYD88/IRAK4/IRAK1	3
16	KEGG_TOLL_LIKE_RECEPTOR_SIGNALING_PATHWAY	KEGG_TOLL_LIKE_RECEPTOR_SIGNALING_PATHWAY	2023-07-04	102/13356	1.10266e-07	1.60581e-06	9.05533e-08	MYD88/TLR9/IRAK4/IRAK1	4
16	WP_TOLLLIKE_RECEPTOR_SIGNALING_PATHWAY	WP_TOLLLIKE_RECEPTOR_SIGNALING_PATHWAY	2023-07-04	103/13356	1.14701e-07	1.60581e-06	9.05533e-08	MYD88/TLR9/IRAK4/IRAK1	4
16	REACTOME_NEGATIVE_REGULATION_OF_THE_PI3K_AKT_NETWORK	REACTOME_NEGATIVE_REGULATION_OF_THE_PI3K_AKT_NETWORK	2023-07-04	113/13356	1.66738e-07	1.98914e-06	1.1217e-07	MYD88/IRAK4/IRAK1/IL1RL1	4
16	PID_TOLL_ENDOGENOUS_PATHWAY	PID_TOLL_ENDOGENOUS_PATHWAY	2023-07-03	24/13356	1.77602e-07	1.98914e-06	1.1217e-07	MYD88/IRAK4/IRAK1	3
16	WP_TLR4_SIGNALING_AND_TOLERANCE	WP_TLR4_SIGNALING_AND_TOLERANCE	2023-07-03	28/13356	2.87204e-07	2.92426e-06	1.64902e-07	MYD88/IRAK4/IRAK1	3
16	WP_MEASLES_VIRUS_INFECTION	WP_MEASLES_VIRUS_INFECTION	2023-07-04	136/13356	3.51596e-07	3.28156e-06	1.85051e-07	MYD88/TLR9/IRAK4/IRAK1	4
16	WP_TYPE_I_INTERFERON_INDUCTION_AND_SIGNALING_DURING_SARSCOV2_INFECTION	WP_TYPE_I_INTERFERON_INDUCTION_AND_SIGNALING_DURING_SARSCOV2_INFECTION	2023-07-03	31/13356	3.93807e-07	3.3928e-06	1.91323e-07	MYD88/TLR9/IRAK4	3
16	PID_IL1_PATHWAY	PID_IL1_PATHWAY	2023-07-03	34/13356	5.23904e-07	4.10375e-06	2.31415e-07	MYD88/IRAK4/IRAK1	3
16	REACTOME_INTERLEUKIN_1_FAMILY_SIGNALING	REACTOME_INTERLEUKIN_1_FAMILY_SIGNALING	2023-07-04	152/13356	5.4961e-07	4.10375e-06	2.31415e-07	MYD88/IRAK4/IRAK1/IL1RL1	4
16	WP_FIBRIN_COMPLEMENT_RECEPTOR_3_SIGNALING_PATHWAY	WP_FIBRIN_COMPLEMENT_RECEPTOR_3_SIGNALING_PATHWAY	2023-07-03	43/13356	1.07828e-06	7.54795e-06	4.25637e-07	MYD88/IRAK4/IRAK1	3
16	REACTOME_IRS_MEDIATED_SIGNALLING	REACTOME_IRS_MEDIATED_SIGNALLING	2023-07-03	48/13356	1.50952e-06	9.94505e-06	5.60811e-07	PIK3C3/PIK3R4/TLR9	3
16	WP_INTERLEUKIN1_IL1_STRUCTURAL_PATHWAY	WP_INTERLEUKIN1_IL1_STRUCTURAL_PATHWAY	2023-07-03	49/13356	1.6076e-06	1.00028e-05	5.6407e-07	MYD88/IRAK4/IRAK1	3
16	REACTOME_INSULIN_RECEPTOR_SIGNALLING_CASCADE	REACTOME_INSULIN_RECEPTOR_SIGNALLING_CASCADE	2023-07-03	54/13356	2.16186e-06	1.21064e-05	6.82692e-07	PIK3C3/PIK3R4/TLR9	3
16	REACTOME_SIGNALING_BY_TYPE_1_INSULIN_LIKE_GROWTH_FACTOR_1_RECEPTOR_IGF1R	REACTOME_SIGNALING_BY_TYPE_1_INSULIN_LIKE_GROWTH_FACTOR_1_RECEPTOR_IGF1R	2023-07-03	54/13356	2.16186e-06	1.21064e-05	6.82692e-07	PIK3C3/PIK3R4/TLR9	3
16	WP_IL1_SIGNALING_PATHWAY	WP_IL1_SIGNALING_PATHWAY	2023-07-03	55/13356	2.28606e-06	1.21923e-05	6.87538e-07	MYD88/IRAK4/IRAK1	3
16	WP_MIRNAS_INVOLVEMENT_IN_THE_IMMUNE_RESPONSE_IN_SEPSIS	WP_MIRNAS_INVOLVEMENT_IN_THE_IMMUNE_RESPONSE_IN_SEPSIS	2023-07-03	65/13356	3.79762e-06	1.93334e-05	1.09023e-06	MYD88/IRAK4/IRAK1	3
16	KEGG_LEISHMANIA_INFECTION	KEGG_LEISHMANIA_INFECTION	2023-07-03	72/13356	5.17704e-06	2.52099e-05	1.42161e-06	MYD88/IRAK4/IRAK1	3
16	REACTOME_SIGNALING_BY_INSULIN_RECEPTOR	REACTOME_SIGNALING_BY_INSULIN_RECEPTOR	2023-07-03	78/13356	6.59484e-06	3.07759e-05	1.73548e-06	PIK3C3/PIK3R4/TLR9	3
16	REACTOME_INTRACELLULAR_SIGNALING_BY_SECOND_MESSENGERS	REACTOME_INTRACELLULAR_SIGNALING_BY_SECOND_MESSENGERS	2023-07-04	307/13356	9.07271e-06	3.95008e-05	2.22749e-06	MYD88/IRAK4/IRAK1/IL1RL1	4
16	KEGG_APOPTOSIS	KEGG_APOPTOSIS	2023-07-03	87/13356	9.16982e-06	3.95008e-05	2.22749e-06	MYD88/IRAK4/IRAK1	3
16	REACTOME_SYNTHESIS_OF_PIPS_AT_THE_LATE_ENDOSOME_MEMBRANE	REACTOME_SYNTHESIS_OF_PIPS_AT_THE_LATE_ENDOSOME_MEMBRANE	2023-07-02	11/13356	1.29216e-05	5.36007e-05	3.02259e-06	PIK3C3/PIK3R4	2
16	REACTOME_P75NTR_RECRUITS_SIGNALLING_COMPLEXES	REACTOME_P75NTR_RECRUITS_SIGNALLING_COMPLEXES	2023-07-02	13/13356	1.8316e-05	7.3264e-05	4.13143e-06	MYD88/IRAK1	2
16	REACTOME_INTERLEUKIN_1_SIGNALING	REACTOME_INTERLEUKIN_1_SIGNALING	2023-07-03	114/13356	2.06766e-05	7.71837e-05	4.35246e-06	MYD88/IRAK4/IRAK1	3
16	REACTOME_TOLL_LIKE_RECEPTOR_TLR1_TLR2_CASCADE	REACTOME_TOLL_LIKE_RECEPTOR_TLR1_TLR2_CASCADE	2023-07-03	115/13356	2.12256e-05	7.71837e-05	4.35246e-06	MYD88/IRAK4/IRAK1	3
16	REACTOME_TRANSLATION_OF_REPLICASE_AND_ASSEMBLY_OF_THE_REPLICATION_TRANSCRIPTION_COMPLEX	REACTOME_TRANSLATION_OF_REPLICASE_AND_ASSEMBLY_OF_THE_REPLICATION_TRANSCRIPTION_COMPLEX	2023-07-02	14/13356	2.13633e-05	7.71837e-05	4.35246e-06	PIK3C3/PIK3R4	2
16	REACTOME_SARS_COV_2_ACTIVATES_MODULATES_INNATE_AND_ADAPTIVE_IMMUNE_RESPONSES	REACTOME_SARS_COV_2_ACTIVATES_MODULATES_INNATE_AND_ADAPTIVE_IMMUNE_RESPONSES	2023-07-03	126/13356	2.79128e-05	9.27537e-05	5.23047e-06	PIK3C3/PIK3R4/IRAK1	3
16	REACTOME_P75NTR_SIGNALS_VIA_NF_KB	REACTOME_P75NTR_SIGNALS_VIA_NF_KB	2023-07-02	16/13356	2.81574e-05	9.27537e-05	5.23047e-06	MYD88/IRAK1	2
16	REACTOME_SYNTHESIS_OF_PIPS_AT_THE_EARLY_ENDOSOME_MEMBRANE	REACTOME_SYNTHESIS_OF_PIPS_AT_THE_EARLY_ENDOSOME_MEMBRANE	2023-07-02	16/13356	2.81574e-05	9.27537e-05	5.23047e-06	PIK3C3/PIK3R4	2
16	REACTOME_SARS_COV_INFECTIONS	REACTOME_SARS_COV_INFECTIONS	2023-07-04	432/13356	3.49649e-05	0.000108618	6.12507e-06	PIK3C3/PIK3R4/TLR9/IRAK1	4
16	REACTOME_IRAK4_DEFICIENCY_TLR2_4	REACTOME_IRAK4_DEFICIENCY_TLR2_4	2023-07-02	18/13356	3.58827e-05	0.000108618	6.12507e-06	MYD88/IRAK4	2
16	REACTOME_SYNTHESIS_OF_PIPS_AT_THE_GOLGI_MEMBRANE	REACTOME_SYNTHESIS_OF_PIPS_AT_THE_GOLGI_MEMBRANE	2023-07-02	18/13356	3.58827e-05	0.000108618	6.12507e-06	PIK3C3/PIK3R4	2
16	WP_HOSTPATHOGEN_INTERACTION_OF_HUMAN_CORONAVIRUSES_AUTOPHAGY	WP_HOSTPATHOGEN_INTERACTION_OF_HUMAN_CORONAVIRUSES_AUTOPHAGY	2023-07-02	19/13356	4.00942e-05	0.000118172	6.66386e-06	PIK3C3/PIK3R4	2
16	WP_HEPATITIS_B_INFECTION	WP_HEPATITIS_B_INFECTION	2023-07-03	151/13356	4.79624e-05	0.000137738	7.76719e-06	MYD88/IRAK4/IRAK1	3
16	REACTOME_SIGNALING_BY_INTERLEUKINS	REACTOME_SIGNALING_BY_INTERLEUKINS	2023-07-04	474/13356	5.03485e-05	0.000140976	7.94977e-06	MYD88/IRAK4/IRAK1/IL1RL1	4
16	REACTOME_RHO_GTPASES_ACTIVATE_NADPH_OXIDASES	REACTOME_RHO_GTPASES_ACTIVATE_NADPH_OXIDASES	2023-07-02	24/13356	6.46327e-05	0.000172354	9.7192e-06	PIK3C3/PIK3R4	2
16	WP_IL1_AND_MEGAKARYOCYTES_IN_OBESITY	WP_IL1_AND_MEGAKARYOCYTES_IN_OBESITY	2023-07-02	24/13356	6.46327e-05	0.000172354	9.7192e-06	MYD88/IRAK1	2
16	REACTOME_ANTIGEN_PRESENTATION_FOLDING_ASSEMBLY_AND_PEPTIDE_LOADING_OF_CLASS_I_MHC	REACTOME_ANTIGEN_PRESENTATION_FOLDING_ASSEMBLY_AND_PEPTIDE_LOADING_OF_CLASS_I_MHC	2023-07-02	29/13356	9.49569e-05	0.00024733	1.39472e-05	PIK3C3/PIK3R4	2
16	WP_AUTOPHAGY	WP_AUTOPHAGY	2023-07-02	30/13356	0.000101714	0.000258909	1.46001e-05	PIK3C3/PIK3R4	2
16	BIOCARTA_IL1R_PATHWAY	BIOCARTA_IL1R_PATHWAY	2023-07-02	31/13356	0.000108702	0.000264665	1.49247e-05	MYD88/IRAK1	2
16	REACTOME_DISEASES_OF_IMMUNE_SYSTEM	REACTOME_DISEASES_OF_IMMUNE_SYSTEM	2023-07-02	31/13356	0.000108702	0.000264665	1.49247e-05	MYD88/IRAK4	2
16	REACTOME_SARS_COV_2_HOST_INTERACTIONS	REACTOME_SARS_COV_2_HOST_INTERACTIONS	2023-07-03	204/13356	0.000117466	0.000279918	1.57849e-05	PIK3C3/PIK3R4/IRAK1	3
16	WP_SIGNAL_TRANSDUCTION_THROUGH_IL1R	WP_SIGNAL_TRANSDUCTION_THROUGH_IL1R	2023-07-02	33/13356	0.000123367	0.000287857	1.62326e-05	MYD88/IRAK1	2
16	KEGG_REGULATION_OF_AUTOPHAGY	KEGG_REGULATION_OF_AUTOPHAGY	2023-07-02	35/13356	0.000138953	0.000317606	1.79101e-05	PIK3C3/PIK3R4	2
16	REACTOME_EARLY_SARS_COV_2_INFECTION_EVENTS	REACTOME_EARLY_SARS_COV_2_INFECTION_EVENTS	2023-07-02	37/13356	0.000155456	0.000348221	1.96365e-05	PIK3C3/PIK3R4	2
16	WP_NEURODEGENERATION_WITH_BRAIN_IRON_ACCUMULATION_NBIA_SUBTYPES_PATHWAY	WP_NEURODEGENERATION_WITH_BRAIN_IRON_ACCUMULATION_NBIA_SUBTYPES_PATHWAY	2023-07-02	44/13356	0.000220427	0.000484074	2.72974e-05	PIK3C3/PIK3R4	2
16	WP_PHOSPHOINOSITIDES_METABOLISM	WP_PHOSPHOINOSITIDES_METABOLISM	2023-07-02	49/13356	0.000273677	0.000589457	3.32401e-05	PIK3C3/PIK3R4	2
16	REACTOME_SARS_COV_1_INFECTION	REACTOME_SARS_COV_1_INFECTION	2023-07-02	52/13356	0.000308353	0.000651614	3.67451e-05	PIK3C3/PIK3R4	2
16	REACTOME_SARS_COV_2_INFECTION	REACTOME_SARS_COV_2_INFECTION	2023-07-03	289/13356	0.000329018	0.000682409	3.84817e-05	PIK3C3/PIK3R4/IRAK1	3
16	WP_AGERAGE_PATHWAY	WP_AGERAGE_PATHWAY	2023-07-02	66/13356	0.000497064	0.0010122	5.70791e-05	MYD88/IRAK4	2
16	PID_P75_NTR_PATHWAY	PID_P75_NTR_PATHWAY	2023-07-02	68/13356	0.00052762	0.00105524	5.9506e-05	MYD88/IRAK1	2
16	REACTOME_CLASS_I_MHC_MEDIATED_ANTIGEN_PROCESSING_PRESENTATION	REACTOME_CLASS_I_MHC_MEDIATED_ANTIGEN_PROCESSING_PRESENTATION	2023-07-03	381/13356	0.000740088	0.00145421	8.20042e-05	MYD88/PIK3C3/PIK3R4	3
16	REACTOME_PI_METABOLISM	REACTOME_PI_METABOLISM	2023-07-02	84/13356	0.000804187	0.00155291	8.75703e-05	PIK3C3/PIK3R4	2
16	WP_APOPTOSIS_MODULATION_AND_SIGNALING	WP_APOPTOSIS_MODULATION_AND_SIGNALING	2023-07-02	92/13356	0.00096374	0.00182947	0.000103166	MYD88/IRAK1	2
16	REACTOME_P75_NTR_RECEPTOR_MEDIATED_SIGNALLING	REACTOME_P75_NTR_RECEPTOR_MEDIATED_SIGNALLING	2023-07-02	97/13356	0.00107061	0.00199847	0.000112695	MYD88/IRAK1	2
16	WP_DNA_DAMAGE_RESPONSE_ONLY_ATM_DEPENDENT	WP_DNA_DAMAGE_RESPONSE_ONLY_ATM_DEPENDENT	2023-07-02	110/13356	0.00137402	0.00252279	0.000142263	PIK3C3/PIK3R4	2
16	WP_BURN_WOUND_HEALING	WP_BURN_WOUND_HEALING	2023-07-02	113/13356	0.00144925	0.00261801	0.000147632	MYD88/TLR9	2
16	WP_OSTEOBLAST_DIFFERENTIATION_AND_RELATED_DISEASES	WP_OSTEOBLAST_DIFFERENTIATION_AND_RELATED_DISEASES	2023-07-02	118/13356	0.00157896	0.00280705	0.000158292	PIK3C3/PIK3R4	2
16	KEGG_NEUROTROPHIN_SIGNALING_PATHWAY	KEGG_NEUROTROPHIN_SIGNALING_PATHWAY	2023-07-02	126/13356	0.00179769	0.00314596	0.000177404	IRAK4/IRAK1	2
16	WP_ANGIOPOIETINLIKE_PROTEIN_8_REGULATORY_PATHWAY	WP_ANGIOPOIETINLIKE_PROTEIN_8_REGULATORY_PATHWAY	2023-07-02	132/13356	0.00197073	0.00339572	0.000191488	PIK3C3/PIK3R4	2
16	REACTOME_DEATH_RECEPTOR_SIGNALLING	REACTOME_DEATH_RECEPTOR_SIGNALLING	2023-07-02	141/13356	0.00224466	0.00380912	0.0002148	MYD88/IRAK1	2
16	WP_REGULATION_OF_ACTIN_CYTOSKELETON	WP_REGULATION_OF_ACTIN_CYTOSKELETON	2023-07-02	150/13356	0.00253572	0.00423148	0.000238617	PIK3C3/PIK3R4	2
16	REACTOME_AUTOPHAGY	REACTOME_AUTOPHAGY	2023-07-02	151/13356	0.00256911	0.00423148	0.000238617	PIK3C3/PIK3R4	2
16	WP_INSULIN_SIGNALING	WP_INSULIN_SIGNALING	2023-07-02	160/13356	0.00287907	0.00467328	0.000263531	PIK3C3/PIK3R4	2
16	REACTOME_PHOSPHOLIPID_METABOLISM	REACTOME_PHOSPHOLIPID_METABOLISM	2023-07-02	211/13356	0.00495089	0.00792142	0.000446696	PIK3C3/PIK3R4	2
16	WP_INTERLEUKIN1_INDUCED_ACTIVATION_OF_NFKB	WP_INTERLEUKIN1_INDUCED_ACTIVATION_OF_NFKB	2023-07-01	10/13356	0.0052305	0.00820767	0.000462839	IRAK1	1
16	WP_NETWORK_MAP_OF_SARSCOV2_SIGNALING_PATHWAY	WP_NETWORK_MAP_OF_SARSCOV2_SIGNALING_PATHWAY	2023-07-02	218/13356	0.00527636	0.00820767	0.000462839	MYD88/IRAK1	2
16	REACTOME_NF_KB_IS_ACTIVATED_AND_SIGNALS_SURVIVAL	REACTOME_NF_KB_IS_ACTIVATED_AND_SIGNALS_SURVIVAL	2023-07-01	13/13356	0.00679508	0.0102844	0.00057995	IRAK1	1
16	REACTOME_TRAFFICKING_AND_PROCESSING_OF_ENDOSOMAL_TLR	REACTOME_TRAFFICKING_AND_PROCESSING_OF_ENDOSOMAL_TLR	2023-07-01	13/13356	0.00679508	0.0102844	0.00057995	TLR9	1
16	REACTOME_IRAK1_RECRUITS_IKK_COMPLEX	REACTOME_IRAK1_RECRUITS_IKK_COMPLEX	2023-07-01	14/13356	0.00731613	0.0109254	0.000616095	IRAK1	1
16	WP_ALZHEIMERS_DISEASE	WP_ALZHEIMERS_DISEASE	2023-07-02	262/13356	0.00754331	0.0111165	0.000626868	PIK3C3/PIK3R4	2
16	WP_IL18_SIGNALING_PATHWAY	WP_IL18_SIGNALING_PATHWAY	2023-07-02	273/13356	0.00816867	0.0118817	0.000670021	MYD88/IRAK1	2
16	REACTOME_RIP_MEDIATED_NFKB_ACTIVATION_VIA_ZBP1	REACTOME_RIP_MEDIATED_NFKB_ACTIVATION_VIA_ZBP1	2023-07-01	17/13356	0.00887789	0.0127477	0.000718857	MYD88	1
16	BIOCARTA_GSK3_PATHWAY	BIOCARTA_GSK3_PATHWAY	2023-07-01	20/13356	0.0104375	0.0147975	0.000834447	MYD88	1
16	BIOCARTA_NFKB_PATHWAY	BIOCARTA_NFKB_PATHWAY	2023-07-01	21/13356	0.010957	0.0151504	0.000854344	MYD88	1
16	REACTOME_ZBP1_DAI_MEDIATED_INDUCTION_OF_TYPE_I_IFNS	REACTOME_ZBP1_DAI_MEDIATED_INDUCTION_OF_TYPE_I_IFNS	2023-07-01	21/13356	0.010957	0.0151504	0.000854344	MYD88	1
16	REACTOME_RHO_GTPASE_EFFECTORS	REACTOME_RHO_GTPASE_EFFECTORS	2023-07-02	324/13356	0.0113657	0.015425	0.000869833	PIK3C3/PIK3R4	2
16	REACTOME_JNK_C_JUN_KINASES_PHOSPHORYLATION_AND_ACTIVATION_MEDIATED_BY_ACTIVATED_HUMAN_TAK1	REACTOME_JNK_C_JUN_KINASES_PHOSPHORYLATION_AND_ACTIVATION_MEDIATED_BY_ACTIVATED_HUMAN_TAK1	2023-07-01	22/13356	0.0114761	0.015425	0.000869833	IRAK1	1
16	WP_ALZHEIMERS_DISEASE_AND_MIRNA_EFFECTS	WP_ALZHEIMERS_DISEASE_AND_MIRNA_EFFECTS	2023-07-02	327/13356	0.0115688	0.015425	0.000869833	PIK3C3/PIK3R4	2
16	BIOCARTA_NTHI_PATHWAY	BIOCARTA_NTHI_PATHWAY	2023-07-01	23/13356	0.0119951	0.015442	0.000870787	MYD88	1
16	REACTOME_ACTIVATED_TAK1_MEDIATES_P38_MAPK_ACTIVATION	REACTOME_ACTIVATED_TAK1_MEDIATES_P38_MAPK_ACTIVATION	2023-07-01	23/13356	0.0119951	0.015442	0.000870787	IRAK1	1
16	WP_EBSTEINBARR_VIRUS_LMP1_SIGNALING	WP_EBSTEINBARR_VIRUS_LMP1_SIGNALING	2023-07-01	23/13356	0.0119951	0.015442	0.000870787	IRAK1	1
16	BIOCARTA_TOLL_PATHWAY	BIOCARTA_TOLL_PATHWAY	2023-07-01	25/13356	0.0130323	0.0165865	0.000935332	MYD88	1
16	WP_HOSTPATHOGEN_INTERACTION_OF_HUMAN_CORONAVIRUSES_INTERFERON_INDUCTION	WP_HOSTPATHOGEN_INTERACTION_OF_HUMAN_CORONAVIRUSES_INTERFERON_INDUCTION	2023-07-01	33/13356	0.0171718	0.0216094	0.00121857	MYD88	1
16	REACTOME_NOD1_2_SIGNALING_PATHWAY	REACTOME_NOD1_2_SIGNALING_PATHWAY	2023-07-01	36/13356	0.0187202	0.0232963	0.0013137	IRAK1	1
16	WP_GENETIC_CAUSES_OF_PSVDINCPH	WP_GENETIC_CAUSES_OF_PSVDINCPH	2023-07-01	37/13356	0.0192359	0.0234176	0.00132054	TLR9	1
16	WP_MELATONIN_METABOLISM_AND_EFFECTS	WP_MELATONIN_METABOLISM_AND_EFFECTS	2023-07-01	37/13356	0.0192359	0.0234176	0.00132054	IRAK1	1
16	WP_MICROGLIA_PATHOGEN_PHAGOCYTOSIS_PATHWAY	WP_MICROGLIA_PATHOGEN_PHAGOCYTOSIS_PATHWAY	2023-07-01	40/13356	0.0207816	0.024761	0.0013963	PIK3C3	1
16	WP_NEURAL_CREST_CELL_MIGRATION_DURING_DEVELOPMENT	WP_NEURAL_CREST_CELL_MIGRATION_DURING_DEVELOPMENT	2023-07-01	40/13356	0.0207816	0.024761	0.0013963	PIK3R4	1
16	WP_NEURAL_CREST_CELL_MIGRATION_IN_CANCER	WP_NEURAL_CREST_CELL_MIGRATION_IN_CANCER	2023-07-01	43/13356	0.0223251	0.0263202	0.00148422	PIK3R4	1
16	REACTOME_TAK1_DEPENDENT_IKK_AND_NF_KAPPA_B_ACTIVATION	REACTOME_TAK1_DEPENDENT_IKK_AND_NF_KAPPA_B_ACTIVATION	2023-07-01	44/13356	0.0228392	0.0266457	0.00150258	IRAK1	1
16	WP_INTERACTIONS_BETWEEN_IMMUNE_CELLS_AND_MICRORNAS_IN_TUMOR_MICROENVIRONMENT	WP_INTERACTIONS_BETWEEN_IMMUNE_CELLS_AND_MICRORNAS_IN_TUMOR_MICROENVIRONMENT	2023-07-01	48/13356	0.0248931	0.0287426	0.00162082	IRAK4	1
16	KEGG_INOSITOL_PHOSPHATE_METABOLISM	KEGG_INOSITOL_PHOSPHATE_METABOLISM	2023-07-01	54/13356	0.0279671	0.0319624	0.00180239	PIK3C3	1
16	REACTOME_NUCLEOTIDE_BINDING_DOMAIN_LEUCINE_RICH_REPEAT_CONTAINING_RECEPTOR_NLR_SIGNALING_PATHWAYS	REACTOME_NUCLEOTIDE_BINDING_DOMAIN_LEUCINE_RICH_REPEAT_CONTAINING_RECEPTOR_NLR_SIGNALING_PATHWAYS	2023-07-01	56/13356	0.0289899	0.0327967	0.00184944	IRAK1	1
16	REACTOME_TRANSCRIPTIONAL_REGULATION_BY_MECP2	REACTOME_TRANSCRIPTIONAL_REGULATION_BY_MECP2	2023-07-01	63/13356	0.0325625	0.03647	0.00205658	IRAK1	1
16	REACTOME_CYTOSOLIC_SENSORS_OF_PATHOGEN_ASSOCIATED_DNA	REACTOME_CYTOSOLIC_SENSORS_OF_PATHOGEN_ASSOCIATED_DNA	2023-07-01	64/13356	0.0330719	0.0366738	0.00206807	MYD88	1
16	WP_AMPACTIVATED_PROTEIN_KINASE_SIGNALING	WP_AMPACTIVATED_PROTEIN_KINASE_SIGNALING	2023-07-01	67/13356	0.0345989	0.0379909	0.00214235	PIK3C3	1
16	REACTOME_INTERLEUKIN_17_SIGNALING	REACTOME_INTERLEUKIN_17_SIGNALING	2023-07-01	71/13356	0.0366316	0.0398324	0.00224619	IRAK1	1
16	KEGG_PHOSPHATIDYLINOSITOL_SIGNALING_SYSTEM	KEGG_PHOSPHATIDYLINOSITOL_SIGNALING_SYSTEM	2023-07-01	76/13356	0.0391674	0.0421802	0.00237859	PIK3C3	1
16	WP_CLOCKCONTROLLED_AUTOPHAGY_IN_BONE_METABOLISM	WP_CLOCKCONTROLLED_AUTOPHAGY_IN_BONE_METABOLISM	2023-07-01	80/13356	0.0411918	0.043938	0.00247771	PIK3C3	1
16	WP_TCELL_ACTIVATION_SARSCOV2	WP_TCELL_ACTIVATION_SARSCOV2	2023-07-01	88/13356	0.0452298	0.04779	0.00269493	MYD88	1
16	REACTOME_ANTIGEN_PROCESSING_CROSS_PRESENTATION	REACTOME_ANTIGEN_PROCESSING_CROSS_PRESENTATION	2023-07-01	106/13356	0.0542621	0.0567977	0.00320288	MYD88	1
16	REACTOME_MYD88_INDEPENDENT_TLR4_CASCADE	REACTOME_MYD88_INDEPENDENT_TLR4_CASCADE	2023-07-01	108/13356	0.0552611	0.0573078	0.00323164	IRAK1	1
16	REACTOME_POTENTIAL_THERAPEUTICS_FOR_SARS	REACTOME_POTENTIAL_THERAPEUTICS_FOR_SARS	2023-07-01	154/13356	0.0779908	0.0801373	0.00451902	TLR9	1
16	WP_CILIOPATHIES	WP_CILIOPATHIES	2023-07-01	184/13356	0.0925606	0.093881	0.00529404	PIK3R4	1
16	WP_VITAMIN_D_RECEPTOR_PATHWAY	WP_VITAMIN_D_RECEPTOR_PATHWAY	2023-07-01	185/13356	0.0930428	0.093881	0.00529404	IL1RL1	1
16	WP_FOCAL_ADHESION_PI3KAKTMTORSIGNALING_PATHWAY	WP_FOCAL_ADHESION_PI3KAKTMTORSIGNALING_PATHWAY	2023-07-01	302/13356	0.147971	0.147971	0.00834421	PIK3R4	1
6	KEGG_ERBB_SIGNALING_PATHWAY	KEGG_ERBB_SIGNALING_PATHWAY	14/22	87/13356	2.53536e-26	1.27782e-23	2.2151e-24	PIK3CA/PIK3R1/AREG/BTC/EGF/EREG/HBEGF/TGFA/PIK3R3/PIK3CB/PIK3R2/PIK3R5/PIK3CD/PIK3CG	14
6	REACTOME_CONSTITUTIVE_SIGNALING_BY_ABERRANT_PI3K_IN_CANCER	REACTOME_CONSTITUTIVE_SIGNALING_BY_ABERRANT_PI3K_IN_CANCER	13/22	78/13356	1.53258e-24	3.8621e-22	6.69496e-23	PIK3CA/PIK3R1/AREG/BTC/EGF/EPGN/EREG/HBEGF/TGFA/PIK3R3/PIK3CB/PIK3R2/PIK3CD	13
6	REACTOME_SYNTHESIS_OF_PIPS_AT_THE_PLASMA_MEMBRANE	REACTOME_SYNTHESIS_OF_PIPS_AT_THE_PLASMA_MEMBRANE	2022-12-01	53/13356	2.50527e-24	4.20885e-22	7.29604e-23	PIK3CA/PIK3R1/INPP5K/PIK3R3/PIK3CB/INPPL1/PIK3R2/PIK3R5/INPP5D/PIK3CD/PIK3CG/PIK3R6	12
6	REACTOME_PI3K_AKT_SIGNALING_IN_CANCER	REACTOME_PI3K_AKT_SIGNALING_IN_CANCER	13/22	105/13356	9.54065e-23	1.20212e-20	2.08388e-21	PIK3CA/PIK3R1/AREG/BTC/EGF/EPGN/EREG/HBEGF/TGFA/PIK3R3/PIK3CB/PIK3R2/PIK3CD	13
6	REACTOME_NEGATIVE_REGULATION_OF_THE_PI3K_AKT_NETWORK	REACTOME_NEGATIVE_REGULATION_OF_THE_PI3K_AKT_NETWORK	13/22	113/13356	2.61036e-22	2.63124e-20	4.56126e-21	PIK3CA/PIK3R1/AREG/BTC/EGF/EPGN/EREG/HBEGF/TGFA/PIK3R3/PIK3CB/PIK3R2/PIK3CD	13
6	REACTOME_GAB1_SIGNALOSOME	REACTOME_GAB1_SIGNALOSOME	2022-09-01	17/13356	3.23078e-22	2.71385e-20	4.70446e-21	PIK3CA/PIK3R1/AREG/BTC/EGF/EPGN/EREG/HBEGF/TGFA	9
6	REACTOME_PI_METABOLISM	REACTOME_PI_METABOLISM	2022-12-01	84/13356	1.03847e-21	7.47702e-20	1.29614e-20	PIK3CA/PIK3R1/INPP5K/PIK3R3/PIK3CB/INPPL1/PIK3R2/PIK3R5/INPP5D/PIK3CD/PIK3CG/PIK3R6	12
6	WP_ERBB_SIGNALING_PATHWAY	WP_ERBB_SIGNALING_PATHWAY	2022-12-01	92/13356	3.31611e-21	2.08915e-19	3.62154e-20	PIK3CA/PIK3R1/AREG/BTC/EGF/EREG/HBEGF/TGFA/PIK3R3/PIK3CB/PIK3R2/PIK3CD	12
6	REACTOME_SIGNALING_BY_EGFR_IN_CANCER	REACTOME_SIGNALING_BY_EGFR_IN_CANCER	2022-09-01	25/13356	2.6961e-20	1.50982e-18	2.61727e-19	PIK3CA/PIK3R1/AREG/BTC/EGF/EPGN/EREG/HBEGF/TGFA	9
6	REACTOME_EXTRA_NUCLEAR_ESTROGEN_SIGNALING	REACTOME_EXTRA_NUCLEAR_ESTROGEN_SIGNALING	2022-11-01	75/13356	5.46949e-20	2.75662e-18	4.7786e-19	PIK3CA/PIK3R1/AREG/BTC/EGF/EPGN/EREG/HBEGF/TGFA/PIK3R3/PIK3R2	11
6	KEGG_PHOSPHATIDYLINOSITOL_SIGNALING_SYSTEM	KEGG_PHOSPHATIDYLINOSITOL_SIGNALING_SYSTEM	2022-11-01	76/13356	6.39024e-20	2.92789e-18	5.0755e-19	PIK3CA/PIK3R1/INPP5K/PIK3R3/PIK3CB/INPPL1/PIK3R2/PIK3R5/INPP5D/PIK3CD/PIK3CG	11
6	PID_PI3KCI_PATHWAY	PID_PI3KCI_PATHWAY	2022-10-01	48/13356	8.26501e-20	3.47131e-18	6.01751e-19	PIK3CA/PIK3R1/PIK3R3/PIK3CB/INPPL1/PIK3R2/PIK3R5/PIK3CD/PIK3CG/PIK3R6	10
6	KEGG_NON_SMALL_CELL_LUNG_CANCER	KEGG_NON_SMALL_CELL_LUNG_CANCER	2022-10-01	54/13356	3.00911e-19	1.16661e-17	2.02232e-18	PIK3CA/PIK3R1/EGF/TGFA/PIK3R3/PIK3CB/PIK3R2/PIK3R5/PIK3CD/PIK3CG	10
6	PID_ERBB4_PATHWAY	PID_ERBB4_PATHWAY	2022-09-01	38/13356	2.12683e-18	7.49531e-17	1.29931e-17	PIK3CA/PIK3R1/BTC/EREG/HBEGF/PIK3R3/PIK3CB/PIK3R2/PIK3CD	9
6	KEGG_GLIOMA	KEGG_GLIOMA	2022-10-01	65/13356	2.23075e-18	7.49531e-17	1.29931e-17	PIK3CA/PIK3R1/EGF/TGFA/PIK3R3/PIK3CB/PIK3R2/PIK3R5/PIK3CD/PIK3CG	10
6	KEGG_PANCREATIC_CANCER	KEGG_PANCREATIC_CANCER	2022-10-01	70/13356	4.92322e-18	1.55081e-16	2.68834e-17	PIK3CA/PIK3R1/EGF/TGFA/PIK3R3/PIK3CB/PIK3R2/PIK3R5/PIK3CD/PIK3CG	10
6	KEGG_B_CELL_RECEPTOR_SIGNALING_PATHWAY	KEGG_B_CELL_RECEPTOR_SIGNALING_PATHWAY	2022-10-01	75/13356	1.02451e-17	3.03738e-16	5.2653e-17	PIK3CA/PIK3R1/PIK3R3/PIK3CB/PIK3R2/PIK3R5/INPP5D/PIK3CD/PIK3CG/CD22	10
6	REACTOME_INTERLEUKIN_RECEPTOR_SHC_SIGNALING	REACTOME_INTERLEUKIN_RECEPTOR_SHC_SIGNALING	2022-08-01	27/13356	2.78307e-17	7.79261e-16	1.35085e-16	PIK3CA/PIK3R1/PIK3R3/PIK3CB/INPPL1/PIK3R2/INPP5D/PIK3CD	8
6	REACTOME_SIGNALING_BY_EGFR	REACTOME_SIGNALING_BY_EGFR	2022-09-01	50/13356	3.23458e-17	8.58015e-16	1.48737e-16	PIK3CA/PIK3R1/AREG/BTC/EGF/EPGN/EREG/HBEGF/TGFA	9
6	REACTOME_SHC1_EVENTS_IN_EGFR_SIGNALING	REACTOME_SHC1_EVENTS_IN_EGFR_SIGNALING	2022-07-01	14/13356	3.87054e-17	9.75376e-16	1.69081e-16	AREG/BTC/EGF/EPGN/EREG/HBEGF/TGFA	7
6	KEGG_ENDOMETRIAL_CANCER	KEGG_ENDOMETRIAL_CANCER	2022-09-01	52/13356	4.74144e-17	1.13795e-15	1.97263e-16	PIK3CA/PIK3R1/EGF/PIK3R3/PIK3CB/PIK3R2/PIK3R5/PIK3CD/PIK3CG	9
6	KEGG_PROSTATE_CANCER	KEGG_PROSTATE_CANCER	2022-10-01	89/13356	6.21295e-17	1.42333e-15	2.46734e-16	PIK3CA/PIK3R1/EGF/TGFA/PIK3R3/PIK3CB/PIK3R2/PIK3R5/PIK3CD/PIK3CG	10
6	REACTOME_PHOSPHOLIPID_METABOLISM	REACTOME_PHOSPHOLIPID_METABOLISM	2022-12-01	211/13356	9.94276e-17	2.17876e-15	3.77688e-16	PIK3CA/PIK3R1/INPP5K/PIK3R3/PIK3CB/INPPL1/PIK3R2/PIK3R5/INPP5D/PIK3CD/PIK3CG/PIK3R6	12
6	REACTOME_INTRACELLULAR_SIGNALING_BY_SECOND_MESSENGERS	REACTOME_INTRACELLULAR_SIGNALING_BY_SECOND_MESSENGERS	13/22	307/13356	1.60549e-16	3.37152e-15	5.84453e-16	PIK3CA/PIK3R1/AREG/BTC/EGF/EPGN/EREG/HBEGF/TGFA/PIK3R3/PIK3CB/PIK3R2/PIK3CD	13
6	PID_CXCR4_PATHWAY	PID_CXCR4_PATHWAY	2022-10-01	100/13356	2.09596e-16	4.22546e-15	7.32483e-16	PIK3CA/PIK3R1/CD3G/PIK3R3/PIK3CB/PIK3R2/PIK3R5/PIK3CD/PIK3CG/PIK3R6	10
6	REACTOME_GPVI_MEDIATED_ACTIVATION_CASCADE	REACTOME_GPVI_MEDIATED_ACTIVATION_CASCADE	2022-08-01	35/13356	2.92848e-16	5.67674e-15	9.84063e-16	PIK3CA/PIK3R1/PIK3R3/PIK3CB/PIK3R2/PIK3R5/PIK3CG/PIK3R6	8
6	KEGG_RENAL_CELL_CARCINOMA	KEGG_RENAL_CELL_CARCINOMA	2022-09-01	70/13356	8.24959e-16	1.53992e-14	2.66946e-15	PIK3CA/PIK3R1/TGFA/PIK3R3/PIK3CB/PIK3R2/PIK3R5/PIK3CD/PIK3CG	9
6	KEGG_MELANOMA	KEGG_MELANOMA	2022-09-01	71/13356	9.4388e-16	1.65527e-14	2.86941e-15	PIK3CA/PIK3R1/EGF/PIK3R3/PIK3CB/PIK3R2/PIK3R5/PIK3CD/PIK3CG	9
6	WP_MICROGLIA_PATHOGEN_PHAGOCYTOSIS_PATHWAY	WP_MICROGLIA_PATHOGEN_PHAGOCYTOSIS_PATHWAY	2022-08-01	40/13356	9.52437e-16	1.65527e-14	2.86941e-15	PIK3CA/PIK3R1/PIK3R3/PIK3CB/PIK3R2/PIK3CD/PIK3CG/PIK3R6	8
6	KEGG_ALDOSTERONE_REGULATED_SODIUM_REABSORPTION	KEGG_ALDOSTERONE_REGULATED_SODIUM_REABSORPTION	2022-08-01	42/13356	1.45903e-15	2.45118e-14	4.24911e-15	PIK3CA/PIK3R1/PIK3R3/PIK3CB/PIK3R2/PIK3R5/PIK3CD/PIK3CG	8
6	REACTOME_INTERLEUKIN_2_FAMILY_SIGNALING	REACTOME_INTERLEUKIN_2_FAMILY_SIGNALING	2022-08-01	44/13356	2.18677e-15	3.55527e-14	6.16307e-15	PIK3CA/PIK3R1/PIK3R3/PIK3CB/INPPL1/PIK3R2/INPP5D/PIK3CD	8
6	KEGG_FC_EPSILON_RI_SIGNALING_PATHWAY	KEGG_FC_EPSILON_RI_SIGNALING_PATHWAY	2022-09-01	79/13356	2.59014e-15	4.07947e-14	7.07177e-15	PIK3CA/PIK3R1/PIK3R3/PIK3CB/PIK3R2/PIK3R5/INPP5D/PIK3CD/PIK3CG	9
6	REACTOME_ESTROGEN_DEPENDENT_NUCLEAR_EVENTS_DOWNSTREAM_OF_ESR_MEMBRANE_SIGNALING	REACTOME_ESTROGEN_DEPENDENT_NUCLEAR_EVENTS_DOWNSTREAM_OF_ESR_MEMBRANE_SIGNALING	2022-07-01	24/13356	3.86506e-15	5.7353e-14	9.94214e-15	AREG/BTC/EGF/EPGN/EREG/HBEGF/TGFA	7
6	KEGG_TYPE_II_DIABETES_MELLITUS	KEGG_TYPE_II_DIABETES_MELLITUS	2022-08-01	47/13356	3.86905e-15	5.7353e-14	9.94214e-15	PIK3CA/PIK3R1/PIK3R3/PIK3CB/PIK3R2/PIK3R5/PIK3CD/PIK3CG	8
6	REACTOME_INTERLEUKIN_3_INTERLEUKIN_5_AND_GM_CSF_SIGNALING	REACTOME_INTERLEUKIN_3_INTERLEUKIN_5_AND_GM_CSF_SIGNALING	2022-08-01	48/13356	4.63852e-15	6.67947e-14	1.15789e-14	PIK3CA/PIK3R1/PIK3R3/PIK3CB/INPPL1/PIK3R2/INPP5D/PIK3CD	8
6	KEGG_INSULIN_SIGNALING_PATHWAY	KEGG_INSULIN_SIGNALING_PATHWAY	2022-10-01	137/13356	5.38548e-15	7.53968e-14	1.307e-14	PIK3CA/PIK3R1/INPP5K/PIK3R3/PIK3CB/PIK3R2/PIK3R5/INPP5D/PIK3CD/PIK3CG	10
6	REACTOME_ERYTHROPOIETIN_ACTIVATES_PHOSPHOINOSITIDE_3_KINASE_PI3K	REACTOME_ERYTHROPOIETIN_ACTIVATES_PHOSPHOINOSITIDE_3_KINASE_PI3K	2022-06-01	12/13356	8.70101e-15	1.18522e-13	2.05458e-14	PIK3CA/PIK3R1/PIK3CB/PIK3R5/PIK3CD/PIK3CG	6
6	KEGG_MTOR_SIGNALING_PATHWAY	KEGG_MTOR_SIGNALING_PATHWAY	2022-08-01	52/13356	9.21597e-15	1.22233e-13	2.11891e-14	PIK3CA/PIK3R1/PIK3R3/PIK3CB/PIK3R2/PIK3R5/PIK3CD/PIK3CG	8
6	REACTOME_ESR_MEDIATED_SIGNALING	REACTOME_ESR_MEDIATED_SIGNALING	2022-11-01	221/13356	1.19366e-14	1.54258e-13	2.67406e-14	PIK3CA/PIK3R1/AREG/BTC/EGF/EPGN/EREG/HBEGF/TGFA/PIK3R3/PIK3R2	11
6	REACTOME_DISEASES_OF_SIGNAL_TRANSDUCTION_BY_GROWTH_FACTOR_RECEPTORS_AND_SECOND_MESSENGERS	REACTOME_DISEASES_OF_SIGNAL_TRANSDUCTION_BY_GROWTH_FACTOR_RECEPTORS_AND_SECOND_MESSENGERS	13/22	432/13356	1.35502e-14	1.70733e-13	2.95965e-14	PIK3CA/PIK3R1/AREG/BTC/EGF/EPGN/EREG/HBEGF/TGFA/PIK3R3/PIK3CB/PIK3R2/PIK3CD	13
6	KEGG_FC_GAMMA_R_MEDIATED_PHAGOCYTOSIS	KEGG_FC_GAMMA_R_MEDIATED_PHAGOCYTOSIS	2022-09-01	96/13356	1.60744e-14	1.97598e-13	3.42536e-14	PIK3CA/PIK3R1/PIK3R3/PIK3CB/PIK3R2/PIK3R5/INPP5D/PIK3CD/PIK3CG	9
6	KEGG_ACUTE_MYELOID_LEUKEMIA	KEGG_ACUTE_MYELOID_LEUKEMIA	2022-08-01	57/13356	2.01419e-14	2.41703e-13	4.18992e-14	PIK3CA/PIK3R1/PIK3R3/PIK3CB/PIK3R2/PIK3R5/PIK3CD/PIK3CG	8
6	WP_CANCER_IMMUNOTHERAPY_BY_CTLA4_BLOCKADE	WP_CANCER_IMMUNOTHERAPY_BY_CTLA4_BLOCKADE	2022-06-01	14/13356	2.82202e-14	3.30767e-13	5.73385e-14	PIK3CA/PIK3R1/PIK3R3/PIK3CB/PIK3R2/PIK3CD	6
6	REACTOME_EGFR_DOWNREGULATION	REACTOME_EGFR_DOWNREGULATION	2022-07-01	31/13356	2.91636e-14	3.34056e-13	5.79086e-14	AREG/BTC/EGF/EPGN/EREG/HBEGF/TGFA	7
6	KEGG_COLORECTAL_CANCER	KEGG_COLORECTAL_CANCER	2022-08-01	62/13356	4.10212e-14	4.59438e-13	7.96435e-14	PIK3CA/PIK3R1/PIK3R3/PIK3CB/PIK3R2/PIK3R5/PIK3CD/PIK3CG	8
6	PID_ERBB_NETWORK_PATHWAY	PID_ERBB_NETWORK_PATHWAY	2022-06-01	15/13356	4.69853e-14	5.14539e-13	8.91953e-14	AREG/BTC/EGF/EREG/HBEGF/TGFA	6
6	KEGG_T_CELL_RECEPTOR_SIGNALING_PATHWAY	KEGG_T_CELL_RECEPTOR_SIGNALING_PATHWAY	2022-09-01	108/13356	4.79828e-14	5.14539e-13	8.91953e-14	PIK3CA/PIK3R1/CD3G/PIK3R3/PIK3CB/PIK3R2/PIK3R5/PIK3CD/PIK3CG	9
6	PID_ERBB1_RECEPTOR_PROXIMAL_PATHWAY	PID_ERBB1_RECEPTOR_PROXIMAL_PATHWAY	2022-07-01	35/13356	7.42858e-14	7.7245e-13	1.33904e-13	PIK3CA/PIK3R1/EGF/PIK3R3/PIK3CB/PIK3R2/PIK3CD	7
6	REACTOME_PI3K_EVENTS_IN_ERBB2_SIGNALING	REACTOME_PI3K_EVENTS_IN_ERBB2_SIGNALING	2022-06-01	16/13356	7.50993e-14	7.7245e-13	1.33904e-13	PIK3CA/PIK3R1/BTC/EGF/EREG/HBEGF	6
6	WP_OSTEOBLAST_DIFFERENTIATION_AND_RELATED_DISEASES	WP_OSTEOBLAST_DIFFERENTIATION_AND_RELATED_DISEASES	2022-09-01	118/13356	1.08717e-13	1.09587e-12	1.89969e-13	PIK3CA/PIK3R1/PIK3R3/PIK3CB/PIK3R2/PIK3R5/PIK3CD/PIK3CG/PIK3R6	9
6	WP_NONSMALL_CELL_LUNG_CANCER	WP_NONSMALL_CELL_LUNG_CANCER	2022-08-01	72/13356	1.43862e-13	1.42169e-12	2.4645e-13	PIK3CA/PIK3R1/EGF/TGFA/PIK3R3/PIK3CB/PIK3R2/PIK3CD	8
6	KEGG_CHRONIC_MYELOID_LEUKEMIA	KEGG_CHRONIC_MYELOID_LEUKEMIA	2022-08-01	73/13356	1.61417e-13	1.5645e-12	2.71206e-13	PIK3CA/PIK3R1/PIK3R3/PIK3CB/PIK3R2/PIK3R5/PIK3CD/PIK3CG	8
6	WP_NEURAL_CREST_CELL_MIGRATION_DURING_DEVELOPMENT	WP_NEURAL_CREST_CELL_MIGRATION_DURING_DEVELOPMENT	2022-07-01	40/13356	2.04944e-13	1.9489e-12	3.37841e-13	PIK3CA/PIK3R3/PIK3CB/PIK3R5/PIK3CD/PIK3CG/PIK3R6	7
6	KEGG_VEGF_SIGNALING_PATHWAY	KEGG_VEGF_SIGNALING_PATHWAY	2022-08-01	76/13356	2.25791e-13	2.10739e-12	3.65315e-13	PIK3CA/PIK3R1/PIK3R3/PIK3CB/PIK3R2/PIK3R5/PIK3CD/PIK3CG	8
6	PID_PDGFRB_PATHWAY	PID_PDGFRB_PATHWAY	2022-09-01	129/13356	2.46772e-13	2.22205e-12	3.85192e-13	PIK3CA/PIK3R1/PIK3R3/PIK3CB/PIK3R2/PIK3R5/PIK3CD/PIK3CG/PIK3R6	9
6	PID_ERBB1_INTERNALIZATION_PATHWAY	PID_ERBB1_INTERNALIZATION_PATHWAY	2022-07-01	41/13356	2.46894e-13	2.22205e-12	3.85192e-13	PIK3CA/PIK3R1/EGF/PIK3R3/PIK3CB/PIK3R2/PIK3CD	7
6	PID_TCPTP_PATHWAY	PID_TCPTP_PATHWAY	2022-07-01	42/13356	2.95981e-13	2.6171e-12	4.53674e-13	PIK3CA/PIK3R1/EGF/PIK3R3/PIK3CB/PIK3R2/PIK3CD	7
6	REACTOME_SIGNALING_BY_NUCLEAR_RECEPTORS	REACTOME_SIGNALING_BY_NUCLEAR_RECEPTORS	2022-11-01	297/13356	3.10445e-13	2.69766e-12	4.6764e-13	PIK3CA/PIK3R1/AREG/BTC/EGF/EPGN/EREG/HBEGF/TGFA/PIK3R3/PIK3R2	11
6	WP_NEURAL_CREST_CELL_MIGRATION_IN_CANCER	WP_NEURAL_CREST_CELL_MIGRATION_IN_CANCER	2022-07-01	43/13356	3.53185e-13	3.01704e-12	5.23004e-13	PIK3CA/PIK3R3/PIK3CB/PIK3R5/PIK3CD/PIK3CG/PIK3R6	7
6	KEGG_SMALL_CELL_LUNG_CANCER	KEGG_SMALL_CELL_LUNG_CANCER	2022-08-01	84/13356	5.18137e-13	4.281e-12	7.42112e-13	PIK3CA/PIK3R1/PIK3R3/PIK3CB/PIK3R2/PIK3R5/PIK3CD/PIK3CG	8
6	WP_EGFR_TYROSINE_KINASE_INHIBITOR_RESISTANCE	WP_EGFR_TYROSINE_KINASE_INHIBITOR_RESISTANCE	2022-08-01	84/13356	5.18137e-13	4.281e-12	7.42112e-13	PIK3CA/PIK3R1/EGF/TGFA/PIK3R3/PIK3CB/PIK3R2/PIK3CD	8
6	KEGG_PROGESTERONE_MEDIATED_OOCYTE_MATURATION	KEGG_PROGESTERONE_MEDIATED_OOCYTE_MATURATION	2022-08-01	85/13356	5.71434e-13	4.64521e-12	8.05247e-13	PIK3CA/PIK3R1/PIK3R3/PIK3CB/PIK3R2/PIK3R5/PIK3CD/PIK3CG	8
6	KEGG_APOPTOSIS	KEGG_APOPTOSIS	2022-08-01	87/13356	6.92546e-13	5.47642e-12	9.49338e-13	PIK3CA/PIK3R1/PIK3R3/PIK3CB/PIK3R2/PIK3R5/PIK3CD/PIK3CG	8
6	REACTOME_REGULATION_OF_SIGNALING_BY_CBL	REACTOME_REGULATION_OF_SIGNALING_BY_CBL	2022-06-01	22/13356	6.95419e-13	5.47642e-12	9.49338e-13	PIK3CA/PIK3R1/PIK3R3/PIK3CB/PIK3R2/PIK3CD	6
6	WP_PANCREATIC_ADENOCARCINOMA_PATHWAY	WP_PANCREATIC_ADENOCARCINOMA_PATHWAY	2022-08-01	89/13356	8.35473e-13	6.47813e-12	1.12298e-12	PIK3CA/PIK3R1/EGF/TGFA/PIK3R3/PIK3CB/PIK3R2/PIK3CD	8
6	REACTOME_MAPK_FAMILY_SIGNALING_CASCADES	REACTOME_MAPK_FAMILY_SIGNALING_CASCADES	2022-11-01	327/13356	8.89605e-13	6.79335e-12	1.17763e-12	PIK3CA/PIK3R1/AREG/BTC/EGF/EPGN/EREG/HBEGF/TGFA/PIK3CB/PIK3R2	11
6	WP_REGULATION_OF_ACTIN_CYTOSKELETON	WP_REGULATION_OF_ACTIN_CYTOSKELETON	2022-09-01	150/13356	9.80493e-13	7.37565e-12	1.27857e-12	PIK3CA/PIK3R1/EGF/PIK3R3/PIK3CB/PIK3R2/PIK3R5/PIK3CD/PIK3CG	9
6	WP_PI3KAKT_SIGNALING_PATHWAY	WP_PI3KAKT_SIGNALING_PATHWAY	2022-11-01	339/13356	1.31822e-12	9.77035e-12	1.69369e-12	PIK3CA/PIK3R1/EGF/TGFA/PIK3R3/PIK3CB/PIK3R2/PIK3R5/PIK3CD/PIK3CG/PIK3R6	11
6	REACTOME_SIGNALING_BY_ERYTHROPOIETIN	REACTOME_SIGNALING_BY_ERYTHROPOIETIN	2022-06-01	25/13356	1.64555e-12	1.20197e-11	2.08361e-12	PIK3CA/PIK3R1/PIK3CB/PIK3R5/PIK3CD/PIK3CG	6
6	REACTOME_PI3K_EVENTS_IN_ERBB4_SIGNALING	REACTOME_PI3K_EVENTS_IN_ERBB4_SIGNALING	2022-05-01	10/13356	1.86525e-12	1.34298e-11	2.32805e-12	PIK3CA/PIK3R1/BTC/EREG/HBEGF	5
6	REACTOME_SIGNALING_BY_ERBB2_IN_CANCER	REACTOME_SIGNALING_BY_ERBB2_IN_CANCER	2022-06-01	26/13356	2.13701e-12	1.51698e-11	2.62968e-12	PIK3CA/PIK3R1/BTC/EGF/EREG/HBEGF	6
6	KEGG_TOLL_LIKE_RECEPTOR_SIGNALING_PATHWAY	KEGG_TOLL_LIKE_RECEPTOR_SIGNALING_PATHWAY	2022-08-01	102/13356	2.56277e-12	1.79394e-11	3.10979e-12	PIK3CA/PIK3R1/PIK3R3/PIK3CB/PIK3R2/PIK3R5/PIK3CD/PIK3CG	8
6	WP_TOLLLIKE_RECEPTOR_SIGNALING_PATHWAY	WP_TOLLLIKE_RECEPTOR_SIGNALING_PATHWAY	2022-08-01	103/13356	2.77598e-12	1.91657e-11	3.32237e-12	PIK3CA/PIK3R1/PIK3R3/PIK3CB/PIK3R2/PIK3R5/PIK3CD/PIK3CG	8
6	WP_MICRORNAS_IN_CARDIOMYOCYTE_HYPERTROPHY	WP_MICRORNAS_IN_CARDIOMYOCYTE_HYPERTROPHY	2022-08-01	104/13356	3.00449e-12	2.0463e-11	3.54726e-12	PIK3CA/PIK3R1/EGF/PIK3R3/PIK3CB/PIK3R2/PIK3CD/PIK3CG	8
[truncated: 4,630 more rows]

## Sheet: Table S3
group	ID	Description	GeneRatio	BgRatio	pvalue	p.adjust	qvalue	geneID	Count
[truncated: 3,055 more rows]

[truncated: 7 more sheets: Table S4, Table S5, Table S6, Table S7, Table S8, Table S9, Table S10]
